# Supplementary material for: Human Papillomavirus 16 Oncoproteins Downregulate the Expression of miR-148a-3p, miR-190a-5p, and miR-199b-5p in Cervical Cancer
Source: Biomed Res Int. 2018 Nov 29;2018:1942867. doi: 10.1155/2018/1942867 (PMC6304571; doi:10.1155/2018/1942867)
Supplement: Supplementary Materials — Table S1: Raw data_Human microRNA lists (800) and expression levels. Table S2: Raw data_qRT PCR for 8 selected human microRNAs. Table S3: Raw data_Human microRNA expression levels depend on stages. Table S4: Raw data_Relative expression of E5, E6, and E7 mRNA. Table S5: Raw data_E5, E6, E7 silencing effects on human microRNAs. [file 1942867.f1.xlsx]

## Sheet: S1. raw
Gene Name	Class Name	SS1673597	CT2	CT3	SS1701937	SS1700135	SS1675494	SS1702430	SS1701944	SS1673764	SS1700753	SS1675199	SS1674064
		HPV-C-	HPV-C-	HPV-C-	HPV-C+	HPV-C+	HPV-C+	HPV+C+	HPV+C+	HPV+C+	HPV+C-	HPV+C-	HPV+C-
		NN1	NN2	NN3	NC1	NC2	NC3	PC1	PC2	PC3	PN1	PN2	PN3
hsa-let-7a-5p	Endogenous1	669	9766	29269	3683	15	17454	14733	46626	20878	1	249	1
hsa-let-7b-5p	Endogenous1	437	8304	16192	1936	329	16487	9314	22276	8481	178	727	166
hsa-let-7c-5p	Endogenous1	55	939	3702	1239	56	3222	3279	7158	3638	25	62	34
hsa-let-7d-5p	Endogenous1	29	564	931	165	26	1127	795	1562	621	19	27	23
hsa-let-7e-5p	Endogenous1	17	356	490	68	14	328	218	695	300	20	21	10
hsa-let-7f-5p	Endogenous1	17	221	412	106	8	278	272	767	313	15	11	7
hsa-let-7g-5p	Endogenous1	62	1230	2940	414	18	1545	1595	4640	1966	13	16	9
hsa-let-7i-5p	Endogenous1	24	1515	745	535	19	1619	1520	2618	923	14	22	11
hsa-miR-1-3p	Endogenous1	9	28	17	45	9	28	66	256	64	22	21	19
hsa-miR-1-5p	Endogenous1	3	10	7	9	10	7	11	11	8	9	2	6
hsa-miR-100-5p	Endogenous1	6	283	1067	242	21	757	923	1909	846	16	17	16
hsa-miR-101-3p	Endogenous1	6	6	12	10	7	7	9	11	10	7	2	6
hsa-miR-103a-3p	Endogenous1	3	8	7	14	14	6	8	11	7	8	15	1
hsa-miR-105-5p	Endogenous1	14	18	30	32	12	24	27	28	13	21	10	16
hsa-miR-106a-5p+hsa-miR-17-5p	Endogenous1	16	84	116	31	5	113	103	188	78	6	6	2
hsa-miR-106b-5p	Endogenous1	11	66	106	25	13	119	72	107	51	16	13	4
hsa-miR-107	Endogenous1	23	95	174	36	22	226	119	224	93	25	20	19
hsa-miR-10a-5p	Endogenous1	10	642	982	44	11	1547	306	984	219	23	34	11
hsa-miR-10b-5p	Endogenous1	21	429	473	118	30	530	417	815	430	23	26	14
hsa-miR-1178-3p	Endogenous1	3	5	2	15	7	10	5	10	9	10	5	6
hsa-miR-1180-3p	Endogenous1	22	125	117	33	16	177	81	168	43	20	20	24
hsa-miR-1183	Endogenous1	8	11	28	24	13	29	26	34	23	8	10	17
hsa-miR-1185-1-3p	Endogenous1	2	4	8	6	5	9	9	4	8	9	6	4
hsa-miR-1185-2-3p	Endogenous1	17	23	18	23	22	17	23	28	10	24	19	7
hsa-miR-1185-5p	Endogenous1	11	22	23	25	19	18	24	29	13	22	12	12
hsa-miR-1193	Endogenous1	14	13	11	14	11	23	17	13	21	9	5	9
hsa-miR-1197	Endogenous1	24	17	24	39	35	18	26	29	19	31	32	26
hsa-miR-1200	Endogenous1	11	13	2	25	22	11	7	1	6	12	12	9
hsa-miR-1202	Endogenous1	4	11	8	6	9	14	7	11	17	9	5	6
hsa-miR-1203	Endogenous1	13	14	15	31	14	14	13	12	16	18	14	8
hsa-miR-1204	Endogenous1	14	13	8	21	12	21	16	18	20	12	11	19
hsa-miR-1205	Endogenous1	9	13	6	13	4	1	10	8	4	8	6	8
hsa-miR-1206	Endogenous1	11	17	17	12	8	14	17	18	10	11	9	4
hsa-miR-122-5p	Endogenous1	1	1	1	1	1	37	1	1	1	1	1	1
hsa-miR-1224-3p	Endogenous1	2	16	5	15	5	6	8	7	4	8	10	5
hsa-miR-1224-5p	Endogenous1	3	11	15	13	17	13	11	14	10	12	9	11
hsa-miR-1226-3p	Endogenous1	11	13	13	12	11	8	8	18	12	9	6	6
hsa-miR-1228-3p	Endogenous1	13	17	9	19	11	16	13	8	16	13	11	12
hsa-miR-1233-3p	Endogenous1	9	13	18	10	8	19	16	47	18	9	12	11
hsa-miR-1234-3p	Endogenous1	12	18	18	21	15	20	21	24	21	15	15	14
hsa-miR-1236-3p	Endogenous1	18	22	16	22	19	24	26	24	21	25	14	13
hsa-miR-124-3p	Endogenous1	12	9	12	32	10	10	12	15	9	18	9	11
hsa-miR-1244	Endogenous1	11	18	15	26	20	30	20	27	14	12	13	19
hsa-miR-1245a	Endogenous1	17	10	10	15	9	12	15	17	14	17	8	8
hsa-miR-1245b-3p	Endogenous1	11	10	10	24	19	19	16	13	12	13	9	16
hsa-miR-1245b-5p	Endogenous1	13	7	15	16	10	15	14	15	11	12	8	12
hsa-miR-1246	Endogenous1	1	1	1	1	1	1	1	132	1	1	1	1
hsa-miR-1247-5p	Endogenous1	5	12	77	7	6	55	82	159	23	10	9	6
hsa-miR-1248	Endogenous1	17	10	9	18	9	20	17	9	12	9	17	17
hsa-miR-1249-3p	Endogenous1	14	7	11	14	22	20	13	19	17	21	13	10
hsa-miR-1249-5p	Endogenous1	5	12	3	9	4	8	6	11	8	8	3	3
hsa-miR-1250-5p	Endogenous1	5	3	4	2	4	4	4	7	4	3	1	1
hsa-miR-1252-5p	Endogenous1	5	12	9	12	3	6	17	11	6	6	11	7
hsa-miR-1253	Endogenous1	1	1	1	1	1	1	1	1	1	1	1	1
hsa-miR-1254	Endogenous1	5	7	10	14	11	15	10	10	14	10	10	4
hsa-miR-1255a	Endogenous1	13	12	18	26	26	17	28	28	30	28	26	13
hsa-miR-1255b-5p	Endogenous1	14	6	8	19	9	14	9	14	12	8	8	7
hsa-miR-1257	Endogenous1	22	17	23	20	18	14	21	11	12	10	17	8
hsa-miR-1258	Endogenous1	13	25	19	16	12	20	20	18	27	22	15	20
hsa-miR-125a-3p	Endogenous1	10	18	16	16	15	28	19	26	9	11	21	10
hsa-miR-125a-5p	Endogenous1	14	845	1142	127	38	576	349	1149	448	24	45	13
hsa-miR-125b-5p	Endogenous1	39	2229	14365	2225	295	10574	6466	17357	6184	55	185	85
hsa-miR-126-3p	Endogenous1	181	5623	5912	976	31	4245	4961	9853	4182	28	57	28
hsa-miR-1260a	Endogenous1	11	173	140	25	46	328	183	204	65	10	28	12
hsa-miR-1260b	Endogenous1	9	25	16	16	8	16	12	23	25	9	10	15
hsa-miR-1261	Endogenous1	16	9	13	16	13	8	10	17	6	18	10	5
hsa-miR-1262	Endogenous1	13	12	7	17	15	11	11	23	18	19	17	11
hsa-miR-1264	Endogenous1	13	23	22	36	21	32	22	15	15	26	20	29
hsa-miR-1266-5p	Endogenous1	19	12	17	18	12	11	12	11	12	6	7	13
hsa-miR-1268a	Endogenous1	5	3	5	12	9	8	5	13	11	10	4	6
hsa-miR-1268b	Endogenous1	21	13	17	23	22	13	18	24	20	27	21	19
hsa-miR-1269a	Endogenous1	6	15	10	16	11	6	16	18	18	12	7	7
hsa-miR-1269b	Endogenous1	9	10	11	15	8	11	11	10	7	15	20	10
hsa-miR-127-3p	Endogenous1	19	194	256	106	25	554	482	1123	356	20	25	18
hsa-miR-127-5p	Endogenous1	14	14	9	26	6	21	20	13	14	19	14	20
hsa-miR-1270	Endogenous1	22	13	12	30	20	24	18	14	17	14	17	9
hsa-miR-1271-3p	Endogenous1	2	1	3	8	2	7	8	1	3	9	6	7
hsa-miR-1271-5p	Endogenous1	16	21	5	20	11	14	8	12	12	7	10	9
hsa-miR-1272	Endogenous1	17	13	6	10	9	6	23	13	11	17	11	10
hsa-miR-1273c	Endogenous1	10	9	15	18	10	11	7	21	1	15	15	8
hsa-miR-1275	Endogenous1	3	8	4	4	4	6	5	6	4	3	4	1
hsa-miR-1276	Endogenous1	14	18	11	26	5	28	20	12	16	17	10	16
hsa-miR-1277-3p	Endogenous1	9	24	20	15	10	17	22	23	8	12	14	13
hsa-miR-1278	Endogenous1	7	2	11	13	12	9	8	10	10	9	7	6
hsa-miR-1279	Endogenous1	8	12	12	9	14	13	9	19	12	12	10	9
hsa-miR-128-1-5p	Endogenous1	15	24	24	24	10	53	25	22	26	13	13	15
hsa-miR-128-2-5p	Endogenous1	6	11	6	11	6	15	7	4	13	5	14	7
hsa-miR-128-3p	Endogenous1	1	1	1	1	1	1	1	1	1	1	1	1
hsa-miR-1281	Endogenous1	17	13	18	31	6	27	23	25	15	13	17	12
hsa-miR-1283	Endogenous1	1	1	1	1	1	1	1	1	1	1	1	1
hsa-miR-1285-3p	Endogenous1	15	26	34	31	16	20	24	20	13	24	21	20
hsa-miR-1285-5p	Endogenous1	20	81	48	20	21	118	40	43	19	29	16	14
hsa-miR-1286	Endogenous1	11	5	14	13	10	5	11	16	12	10	6	11
hsa-miR-1287-3p	Endogenous1	6	5	17	22	11	15	12	17	12	12	6	5
hsa-miR-1287-5p	Endogenous1	14	18	19	18	11	29	20	19	21	9	14	17
hsa-miR-1288-3p	Endogenous1	4	10	3	14	6	12	6	8	4	8	9	5
hsa-miR-1289	Endogenous1	16	10	12	11	15	9	13	11	11	8	11	7
hsa-miR-129-2-3p	Endogenous1	11	10	15	16	13	11	19	33	10	20	11	12
hsa-miR-129-5p	Endogenous1	13	19	14	12	15	8	17	10	9	1	17	11
hsa-miR-1290	Endogenous1	24	31	23	38	13	30	30	33	19	38	17	19
hsa-miR-1291	Endogenous1	5	11	12	21	7	16	16	14	10	16	16	12
hsa-miR-1293	Endogenous1	7	6	13	16	8	14	6	6	8	12	10	11
hsa-miR-1295a	Endogenous1	17	20	19	24	18	22	22	26	20	23	18	7
hsa-miR-1296-3p	Endogenous1	18	22	16	24	23	24	20	12	20	21	30	11
hsa-miR-1296-5p	Endogenous1	10	4	6	12	11	13	13	11	9	4	11	12
hsa-miR-1297	Endogenous1	16	20	14	33	12	18	18	10	9	14	23	15
hsa-miR-1298-5p	Endogenous1	25	13	14	22	12	20	26	21	17	15	18	10
hsa-miR-1299	Endogenous1	13	19	25	44	21	31	27	46	22	28	14	30
hsa-miR-1301-3p	Endogenous1	5	6	8	8	7	9	4	3	4	8	5	5
hsa-miR-1302	Endogenous1	18	10	11	25	7	15	18	10	15	16	15	5
hsa-miR-1303	Endogenous1	9	15	15	15	8	15	13	17	15	13	14	17
hsa-miR-1304-3p	Endogenous1	9	12	6	13	9	11	12	14	9	11	15	7
hsa-miR-1304-5p	Endogenous1	16	13	12	23	23	13	19	10	15	20	17	14
hsa-miR-1305	Endogenous1	7	13	14	21	17	12	13	16	17	13	20	6
hsa-miR-1306-3p	Endogenous1	14	23	15	24	22	21	32	20	12	23	22	17
hsa-miR-1306-5p	Endogenous1	10	10	19	17	8	26	12	20	22	19	15	13
hsa-miR-1307-3p	Endogenous1	16	32	28	29	11	41	33	26	21	27	13	23
hsa-miR-1307-5p	Endogenous1	12	15	29	31	16	20	20	25	20	23	18	15
hsa-miR-130a-3p	Endogenous1	39	1920	5116	337	30	3420	2666	5970	2112	25	32	14
hsa-miR-130b-3p	Endogenous1	6	5	6	11	1	6	11	7	8	3	6	6
hsa-miR-132-3p	Endogenous1	9	190	150	33	13	162	83	162	120	13	19	4
hsa-miR-1322	Endogenous1	7	10	10	21	9	11	16	18	15	14	13	13
hsa-miR-1323	Endogenous1	16	32	21	13	35	38	15	21	20	22	14	14
hsa-miR-133a-3p	Endogenous1	12	21	20	22	19	12	38	118	45	10	15	10
hsa-miR-133a-5p	Endogenous1	14	22	15	26	22	14	17	13	21	17	16	19
hsa-miR-133b	Endogenous1	3	2	5	8	5	10	1	7	2	4	2	4
hsa-miR-134-3p	Endogenous1	13	7	12	17	18	16	15	24	18	18	18	9
hsa-miR-134-5p+hsa-miR-6728-5p	Endogenous1	10	7	8	14	14	16	9	5	8	11	10	4
hsa-miR-135a-5p	Endogenous1	6	201	358	14	6	970	193	349	29	5	4	1
hsa-miR-135b-5p	Endogenous1	14	521	470	39	14	1486	286	291	133	11	18	7
hsa-miR-136-5p	Endogenous1	15	159	520	83	4	181	383	866	357	9	8	9
hsa-miR-137	Endogenous1	18	9	14	25	18	18	16	22	21	16	20	14
hsa-miR-138-5p	Endogenous1	21	16	18	28	10	17	20	24	18	19	20	17
hsa-miR-139-3p	Endogenous1	20	14	19	22	20	25	16	25	12	12	16	12
hsa-miR-139-5p	Endogenous1	5	3	9	9	2	4	4	15	5	2	3	4
hsa-miR-140-3p	Endogenous1	8	15	21	16	8	20	26	31	18	16	18	8
hsa-miR-140-5p	Endogenous1	18	266	395	74	12	175	263	626	207	16	14	18
hsa-miR-141-3p	Endogenous1	20	1193	1605	23	18	2880	431	820	141	21	25	15
hsa-miR-142-3p	Endogenous1	34	8133	3098	825	15	6321	7812	3484	1263	5	29	11
hsa-miR-142-5p	Endogenous1	8	5	11	19	12	15	13	10	8	10	10	10
hsa-miR-143-3p	Endogenous1	1	1875	1109	1	1	691	1213	5284	1233	1	1	1
hsa-miR-144-3p	Endogenous1	19	362	2496	52	17	1164	735	1145	133	10	14	19
hsa-miR-145-5p	Endogenous1	22	1625	2868	493	45	875	1620	8891	2699	25	47	42
hsa-miR-1469	Endogenous1	12	13	11	20	11	18	13	14	9	9	7	13
hsa-miR-146a-5p	Endogenous1	20	260	103	72	27	343	331	186	83	21	18	13
hsa-miR-146b-3p	Endogenous1	4	5	2	2	3	10	8	7	3	3	10	5
hsa-miR-146b-5p	Endogenous1	15	64	58	29	17	140	65	58	28	16	23	14
hsa-miR-147a	Endogenous1	13	13	13	18	16	14	24	21	16	19	20	11
hsa-miR-147b	Endogenous1	11	25	17	24	12	22	15	25	15	22	26	12
hsa-miR-148a-3p	Endogenous1	27	1049	1712	117	13	2683	1486	2811	772	9	15	7
hsa-miR-148b-3p	Endogenous1	11	581	1000	75	14	481	507	796	391	13	24	14
hsa-miR-149-5p	Endogenous1	17	30	55	30	29	99	38	75	42	27	17	16
hsa-miR-150-5p	Endogenous1	109	3012	2436	1622	131	3247	4706	3559	2040	69	746	136
hsa-miR-151a-3p	Endogenous1	11	134	93	34	10	122	91	128	47	17	10	21
hsa-miR-151a-5p	Endogenous1	11	49	116	31	3	87	76	159	63	11	5	11
hsa-miR-151b	Endogenous1	11	20	13	18	8	28	25	14	18	15	11	11
hsa-miR-152-3p	Endogenous1	12	67	71	29	15	68	79	117	43	10	11	19
hsa-miR-152-5p	Endogenous1	4	3	2	6	1	12	8	6	4	7	6	5
hsa-miR-153-3p	Endogenous1	11	10	11	18	8	12	23	17	14	23	5	14
hsa-miR-1537-3p	Endogenous1	12	33	11	16	5	19	18	23	12	6	6	2
hsa-miR-154-5p	Endogenous1	10	82	138	36	14	122	135	366	99	15	16	8
hsa-miR-155-5p	Endogenous1	17	63	59	28	17	144	145	64	40	10	12	7
hsa-miR-15a-5p	Endogenous1	27	985	1270	129	8	1209	952	1432	440	5	15	9
hsa-miR-15b-5p	Endogenous1	18	359	835	57	22	1013	668	1008	290	14	23	16
hsa-miR-16-5p	Endogenous1	27	517	1016	141	26	1618	1013	987	304	26	30	16
hsa-miR-181a-2-3p	Endogenous1	12	15	19	18	20	24	12	17	14	25	21	7
hsa-miR-181a-3p	Endogenous1	20	22	19	37	21	33	34	38	22	32	31	21
hsa-miR-181a-5p	Endogenous1	53	2250	2052	309	24	1758	1799	2635	1138	19	52	28
hsa-miR-181b-2-3p	Endogenous1	31	15	16	24	22	20	21	26	13	18	11	11
hsa-miR-181b-5p+hsa-miR-181d-5p	Endogenous1	14	48	73	25	10	56	60	106	36	18	11	10
hsa-miR-181c-5p	Endogenous1	9	64	97	23	10	98	53	123	51	17	5	11
hsa-miR-181d-3p	Endogenous1	11	12	14	23	20	12	20	18	18	19	20	10
hsa-miR-182-3p	Endogenous1	10	9	7	18	10	9	11	13	12	7	16	7
hsa-miR-182-5p	Endogenous1	2	14	17	9	3	27	9	12	4	8	5	1
hsa-miR-1827	Endogenous1	19	18	19	14	15	23	18	22	13	14	15	12
hsa-miR-183-5p	Endogenous1	24	34	62	28	18	55	29	45	16	23	29	10
hsa-miR-184	Endogenous1	22	16	17	23	19	23	12	11	14	20	14	15
hsa-miR-185-5p	Endogenous1	16	41	33	23	24	46	35	25	23	24	14	13
hsa-miR-186-5p	Endogenous1	16	36	37	35	19	43	37	59	35	24	23	15
hsa-miR-187-3p	Endogenous1	18	30	32	20	23	35	23	49	26	29	14	8
hsa-miR-188-3p	Endogenous1	14	10	17	18	12	16	12	12	11	8	9	8
hsa-miR-188-5p	Endogenous1	36	51	59	44	30	60	58	57	42	27	16	30
hsa-miR-18a-5p	Endogenous1	14	36	32	24	18	53	55	32	24	20	18	11
hsa-miR-18b-5p	Endogenous1	16	25	23	18	18	21	16	24	6	30	20	18
hsa-miR-1908-3p	Endogenous1	6	15	22	35	10	22	14	17	12	14	12	17
hsa-miR-1908-5p	Endogenous1	22	18	21	25	9	26	25	16	22	19	16	10
hsa-miR-1909-3p	Endogenous1	15	8	4	16	12	13	14	6	12	6	11	5
hsa-miR-190a-3p	Endogenous1	12	13	7	12	12	11	16	20	17	10	14	2
hsa-miR-190a-5p	Endogenous1	8	29	96	57	3	81	187	537	224	6	6	5
hsa-miR-190b	Endogenous1	4	6	4	8	4	3	5	8	3	5	4	3
hsa-miR-191-5p	Endogenous1	60	2218	2915	401	121	3853	2094	3864	1612	36	209	56
hsa-miR-1910-3p	Endogenous1	8	7	8	23	11	13	12	11	5	18	7	16
hsa-miR-1910-5p	Endogenous1	7	11	42	21	10	36	25	43	20	13	13	8
hsa-miR-1915-3p	Endogenous1	3	13	18	7	7	11	12	17	8	7	5	4
hsa-miR-192-5p	Endogenous1	11	13	14	14	9	14	7	16	7	11	10	2
hsa-miR-193a-3p	Endogenous1	6	18	16	25	7	24	16	31	17	6	10	13
hsa-miR-193a-5p+hsa-miR-193b-5p	Endogenous1	12	31	18	35	8	29	30	30	19	15	9	9
hsa-miR-193b-3p	Endogenous1	14	36	28	28	7	79	41	83	26	10	13	17
hsa-miR-194-5p	Endogenous1	8	35	50	34	7	62	35	72	39	17	12	8
hsa-miR-195-5p	Endogenous1	16	47	162	68	11	213	364	585	220	14	18	12
hsa-miR-196a-3p	Endogenous1	16	11	11	14	9	17	13	12	12	13	17	6
hsa-miR-196a-5p	Endogenous1	28	36	44	60	25	53	135	77	40	24	21	24
hsa-miR-196b-5p	Endogenous1	15	164	378	35	7	191	238	572	175	14	10	10
hsa-miR-197-3p	Endogenous1	16	12	31	14	15	16	13	25	16	12	8	12
hsa-miR-197-5p	Endogenous1	24	14	26	26	21	12	17	20	16	25	12	11
hsa-miR-1972	Endogenous1	28	489	205	35	46	434	64	70	37	18	39	23
hsa-miR-1973	Endogenous1	17	19	16	11	17	22	25	23	20	31	27	12
hsa-miR-1976	Endogenous1	12	9	18	18	14	10	14	11	5	19	19	4
hsa-miR-198	Endogenous1	11	21	30	28	17	17	22	13	13	19	15	17
hsa-miR-199a-3p+hsa-miR-199b-3p	Endogenous1	262	6412	20736	5347	61	13868	19926	42701	19806	41	59	42
hsa-miR-199a-5p	Endogenous1	20	481	2073	174	25	774	1154	2024	576	25	22	15
hsa-miR-199b-5p	Endogenous1	64	930	5197	1034	28	5520	5374	10558	4291	25	42	23
hsa-miR-19a-3p	Endogenous1	2	37	50	16	5	56	52	59	15	4	3	3
hsa-miR-19b-3p	Endogenous1	19	167	327	44	21	409	271	344	124	20	16	20
hsa-miR-200a-3p	Endogenous1	32	1753	1813	28	18	2253	535	902	153	16	37	18
hsa-miR-200b-3p	Endogenous1	40	5899	4897	35	63	9791	2775	3155	933	21	97	5
hsa-miR-200c-3p	Endogenous1	17	839	1324	10	86	3226	510	775	188	11	93	15
hsa-miR-202-3p	Endogenous1	8	16	10	25	15	27	24	18	17	15	15	22
hsa-miR-203a-3p	Endogenous1	65	69	33	13	56	1003	110	78	247	20	23	14
hsa-miR-203a-5p	Endogenous1	18	15	14	22	28	21	27	22	22	25	24	16
hsa-miR-204-5p	Endogenous1	3	11	92	20	6	25	20	42	52	9	8	7
hsa-miR-205-5p	Endogenous1	183	1012	984	49	605	9091	2425	1106	1106	68	540	61
hsa-miR-2053	Endogenous1	21	26	18	32	26	30	36	25	25	34	19	23
hsa-miR-206	Endogenous1	14	15	15	18	8	16	21	16	12	16	8	12
hsa-miR-208a-3p	Endogenous1	20	31	26	26	17	21	17	39	23	17	24	7
hsa-miR-208b-3p	Endogenous1	12	11	25	37	24	20	20	27	18	30	25	18
hsa-miR-208b-5p	Endogenous1	10	5	15	18	8	19	13	18	10	16	8	15
hsa-miR-20a-5p+hsa-miR-20b-5p	Endogenous1	15	148	211	62	16	344	202	253	75	13	16	22
hsa-miR-21-5p	Endogenous1	43	6354	2349	431	16	3826	2788	3134	1044	13	19	5
hsa-miR-210-3p	Endogenous1	7	15	10	13	14	24	14	24	20	9	8	6
hsa-miR-210-5p	Endogenous1	27	24	20	25	19	38	22	27	20	22	36	9
hsa-miR-211-3p	Endogenous1	6	6	7	9	6	3	7	5	3	5	7	7
hsa-miR-211-5p	Endogenous1	18	11	11	17	22	18	13	26	14	23	22	12
hsa-miR-2110	Endogenous1	15	14	13	11	25	21	14	24	18	25	22	20
hsa-miR-2113	Endogenous1	15	13	11	11	10	14	9	11	9	13	11	9
hsa-miR-2116-5p	Endogenous1	8	7	6	9	7	9	11	16	12	6	3	9
hsa-miR-2117	Endogenous1	18	21	12	36	12	23	23	16	9	16	10	13
hsa-miR-212-3p	Endogenous1	26	30	21	29	26	15	31	27	18	23	24	18
hsa-miR-214-3p	Endogenous1	13	23	51	14	11	43	26	77	31	8	12	5
hsa-miR-215-5p	Endogenous1	11	8	6	14	5	10	8	15	12	9	8	9
hsa-miR-216a-5p	Endogenous1	10	14	15	19	7	10	20	22	17	19	14	9
hsa-miR-216b-5p	Endogenous1	15	23	34	23	21	35	26	39	21	9	9	11
hsa-miR-217	Endogenous1	14	21	21	26	11	22	21	28	13	11	13	17
hsa-miR-218-5p	Endogenous1	21	102	898	140	15	514	561	1115	462	12	9	14
hsa-miR-219a-1-3p	Endogenous1	8	10	10	24	8	25	18	18	10	19	5	11
hsa-miR-219a-2-3p	Endogenous1	11	16	18	36	10	13	17	26	22	14	11	14
hsa-miR-219a-5p	Endogenous1	12	8	14	25	8	22	19	17	21	10	13	11
hsa-miR-219b-3p	Endogenous1	14	12	21	30	11	8	13	14	12	16	15	14
hsa-miR-22-3p	Endogenous1	9	299	161	28	5	228	144	307	103	6	11	5
hsa-miR-221-3p	Endogenous1	23	97	139	48	20	219	90	112	45	25	27	22
hsa-miR-221-5p	Endogenous1	2	5	27	17	11	28	25	32	17	6	10	9
hsa-miR-222-3p	Endogenous1	10	1139	1639	188	17	1688	1671	996	478	14	31	12
hsa-miR-223-3p	Endogenous1	76	11222	3054	770	28	3636	4557	3416	675	12	305	22
hsa-miR-224-5p	Endogenous1	14	16	18	34	13	16	23	12	21	20	11	11
hsa-miR-2278	Endogenous1	6	7	9	15	5	13	11	7	6	8	5	8
hsa-miR-23a-3p	Endogenous1	500	10238	17491	2364	276	14458	10936	23386	10272	62	489	137
hsa-miR-23b-3p	Endogenous1	46	1616	5284	172	48	2237	1536	4361	1521	27	55	19
hsa-miR-23c	Endogenous1	12	11	17	14	12	20	22	21	13	21	21	11
hsa-miR-24-3p	Endogenous1	19	118	142	22	9	256	99	178	69	9	12	6
hsa-miR-25-3p	Endogenous1	15	540	850	233	16	1493	922	1249	433	16	18	13
hsa-miR-25-5p	Endogenous1	18	11	18	25	15	17	19	16	17	26	21	13
hsa-miR-2682-5p	Endogenous1	8	8	15	19	13	23	18	18	11	10	8	9
hsa-miR-26a-5p	Endogenous1	44	613	1897	358	22	683	760	2596	1054	24	32	20
hsa-miR-26b-5p	Endogenous1	37	832	1821	294	21	1050	968	2516	1015	20	21	18
hsa-miR-27a-3p	Endogenous1	12	15	15	26	10	18	21	37	15	14	12	11
hsa-miR-27b-3p	Endogenous1	17	978	2353	117	17	1385	889	2312	613	8	17	9
hsa-miR-28-3p	Endogenous1	31	46	50	29	20	37	58	89	40	17	24	10
hsa-miR-28-5p	Endogenous1	40	531	467	167	17	404	653	1333	561	26	30	27
hsa-miR-296-3p	Endogenous1	16	9	18	11	10	15	12	20	12	12	19	13
hsa-miR-296-5p	Endogenous1	11	39	56	29	16	85	53	143	64	15	10	11
hsa-miR-297	Endogenous1	4	11	7	14	5	10	6	16	3	11	11	6
hsa-miR-298	Endogenous1	14	7	13	18	16	22	21	10	11	13	19	10
hsa-miR-299-3p	Endogenous1	12	18	32	26	15	24	30	71	22	15	11	5
hsa-miR-299-5p	Endogenous1	18	61	195	35	21	79	108	250	94	36	18	16
hsa-miR-29a-3p	Endogenous1	26	646	1396	310	20	1236	745	1374	375	13	19	17
hsa-miR-29b-3p	Endogenous1	149	7214	12925	1108	19	6177	6487	14643	4577	21	48	23
hsa-miR-29c-3p	Endogenous1	17	554	1851	188	21	871	820	1490	607	21	13	15
hsa-miR-300	Endogenous1	11	5	3	6	6	5	11	8	6	17	6	7
hsa-miR-301a-3p	Endogenous1	27	85	163	28	20	148	121	222	80	25	17	9
hsa-miR-301a-5p	Endogenous1	18	9	19	26	22	21	19	14	21	22	30	23
hsa-miR-301b-3p	Endogenous1	13	16	23	26	20	19	16	20	14	13	18	11
hsa-miR-301b-5p	Endogenous1	20	19	16	31	20	22	21	30	19	28	22	12
hsa-miR-302a-3p	Endogenous1	6	7	18	18	8	15	15	8	10	10	9	8
hsa-miR-302a-5p	Endogenous1	3	11	13	14	10	7	15	11	9	11	5	9
hsa-miR-302b-3p	Endogenous1	12	11	24	22	10	13	22	18	8	10	6	13
hsa-miR-302c-3p	Endogenous1	17	22	18	16	10	13	12	17	19	19	15	15
hsa-miR-302d-3p	Endogenous1	1	1	1	1	1	1	1	1	1	1	1	1
hsa-miR-302e	Endogenous1	5	7	7	13	10	10	8	12	8	5	11	12
hsa-miR-302f	Endogenous1	8	5	8	11	10	17	10	20	8	11	4	8
hsa-miR-3065-3p	Endogenous1	14	23	20	16	13	38	20	23	10	12	13	12
hsa-miR-3065-5p	Endogenous1	1	1	1	1	1	52	1	1	1	1	1	1
hsa-miR-3074-3p	Endogenous1	16	11	11	24	10	31	20	18	12	10	13	12
hsa-miR-30a-3p	Endogenous1	13	51	68	21	25	97	50	79	23	21	31	7
hsa-miR-30a-5p	Endogenous1	8	306	426	21	10	394	110	224	74	14	9	12
hsa-miR-30b-5p	Endogenous1	11	80	192	35	5	90	89	312	114	10	16	10
hsa-miR-30c-5p	Endogenous1	4	27	76	17	9	69	48	100	34	16	10	6
hsa-miR-30d-5p	Endogenous1	15	356	511	51	18	726	322	648	186	5	20	9
hsa-miR-30e-3p	Endogenous1	18	49	100	17	23	52	52	104	55	20	9	9
hsa-miR-30e-5p	Endogenous1	18	202	275	42	19	326	207	317	118	32	23	12
hsa-miR-31-5p	Endogenous1	8	44	47	14	12	94	26	14	20	12	9	15
hsa-miR-3127-5p	Endogenous1	12	11	6	11	9	7	9	11	5	10	13	5
hsa-miR-3130-3p	Endogenous1	5	8	8	18	11	11	9	4	14	12	7	9
hsa-miR-3131	Endogenous1	20	12	11	18	15	16	14	11	9	23	16	17
hsa-miR-3136-5p	Endogenous1	9	16	20	22	11	25	17	20	15	13	15	18
hsa-miR-3140-3p	Endogenous1	2	3	2	7	3	6	4	4	5	1	1	12
hsa-miR-3140-5p	Endogenous1	7	7	3	12	3	7	7	6	5	5	7	9
hsa-miR-3144-3p	Endogenous1	1	1	1	1	1	30	1	16	4	23	1	1
hsa-miR-3144-5p	Endogenous1	13	15	18	16	9	21	18	12	13	10	6	13
hsa-miR-3147	Endogenous1	20	16	12	32	13	20	27	20	21	21	28	11
hsa-miR-3150b-3p	Endogenous1	4	16	6	17	6	21	6	13	8	11	5	9
hsa-miR-3151-5p	Endogenous1	8	18	23	26	7	21	12	17	12	19	9	13
hsa-miR-3158-3p	Endogenous1	3	8	10	5	4	6	6	10	7	6	4	3
hsa-miR-3161	Endogenous1	12	17	23	28	10	29	22	25	15	8	10	22
hsa-miR-3164	Endogenous1	18	10	14	40	8	20	13	7	12	17	16	19
hsa-miR-3168	Endogenous1	10	19	18	25	21	14	11	22	18	27	15	11
hsa-miR-3179	Endogenous1	10	18	13	30	11	23	15	14	8	12	14	22
hsa-miR-3180	Endogenous1	21	7	13	22	10	17	18	18	12	11	22	12
hsa-miR-3180-3p	Endogenous1	9	11	11	13	7	11	12	15	9	11	8	8
hsa-miR-3180-5p	Endogenous1	5	9	11	14	13	9	10	11	4	4	9	11
hsa-miR-3182	Endogenous1	9	14	15	19	12	11	16	14	7	9	9	8
hsa-miR-3185	Endogenous1	9	6	8	14	12	10	13	16	9	15	6	11
hsa-miR-3190-3p	Endogenous1	3	6	10	10	9	11	8	10	8	6	7	3
hsa-miR-3192-5p	Endogenous1	7	10	8	13	8	13	16	14	9	15	10	14
hsa-miR-3195	Endogenous1	2	10	17	18	7	25	15	33	12	7	10	13
hsa-miR-3196	Endogenous1	8	16	8	18	15	18	15	9	15	10	9	12
hsa-miR-32-5p	Endogenous1	12	376	528	65	8	409	356	455	191	20	13	21
hsa-miR-3202	Endogenous1	12	9	10	27	6	20	11	12	9	13	11	14
hsa-miR-320a	Endogenous1	13	16	16	22	9	18	14	20	14	16	7	13
hsa-miR-320b	Endogenous1	5	9	7	17	4	15	16	17	14	11	5	12
hsa-miR-320c	Endogenous1	19	17	19	29	20	39	9	15	20	15	18	21
hsa-miR-320d	Endogenous1	3	6	11	17	5	19	12	18	13	9	6	8
hsa-miR-320e	Endogenous1	14	37	29	34	14	43	42	48	21	16	16	12
hsa-miR-323a-3p	Endogenous1	15	32	27	21	8	27	37	34	26	17	8	12
hsa-miR-323a-5p	Endogenous1	4	5	4	9	4	2	6	6	4	6	3	8
hsa-miR-323b-3p	Endogenous1	16	26	19	42	15	31	32	21	18	20	22	27
hsa-miR-323b-5p	Endogenous1	5	10	10	10	8	9	6	10	7	15	8	8
hsa-miR-324-3p	Endogenous1	24	21	22	24	15	16	22	28	17	23	19	16
hsa-miR-324-5p	Endogenous1	7	29	22	6	2	42	20	44	16	3	1	7
hsa-miR-325	Endogenous1	11	21	12	24	15	21	19	21	16	16	9	12
hsa-miR-326	Endogenous1	15	12	12	24	8	16	12	15	10	10	11	18
hsa-miR-328-3p	Endogenous1	17	11	12	17	5	22	18	20	9	13	7	13
hsa-miR-328-5p	Endogenous1	11	8	13	14	13	11	13	14	11	9	15	8
hsa-miR-329-3p	Endogenous1	9	14	15	24	16	22	11	20	14	20	8	12
hsa-miR-329-5p	Endogenous1	15	20	21	24	19	16	22	23	17	17	20	9
hsa-miR-330-3p	Endogenous1	5	10	13	25	6	13	12	10	10	12	8	12
hsa-miR-330-5p	Endogenous1	9	12	13	15	9	12	12	9	11	12	11	12
hsa-miR-331-3p	Endogenous1	9	48	39	13	7	53	26	32	24	15	13	11
hsa-miR-331-5p	Endogenous1	3	11	7	5	7	7	5	7	8	4	4	8
hsa-miR-335-5p	Endogenous1	18	16	42	23	20	26	43	107	57	17	16	10
hsa-miR-337-3p	Endogenous1	24	35	86	40	20	52	83	157	43	24	20	12
hsa-miR-337-5p	Endogenous1	22	57	78	28	24	75	106	200	84	26	26	3
hsa-miR-338-5p	Endogenous1	13	9	11	16	9	7	20	15	16	22	18	4
hsa-miR-339-3p	Endogenous1	9	15	15	10	7	11	12	14	11	16	8	7
hsa-miR-339-5p	Endogenous1	9	15	17	16	9	10	9	9	12	10	15	6
hsa-miR-33a-5p	Endogenous1	11	25	31	13	13	32	26	38	24	11	7	9
hsa-miR-33b-5p	Endogenous1	29	17	22	21	21	17	24	31	24	29	29	15
hsa-miR-340-5p	Endogenous1	11	152	167	48	20	106	167	297	116	13	17	5
hsa-miR-342-3p	Endogenous1	22	360	640	174	28	656	519	913	502	27	50	32
hsa-miR-342-5p	Endogenous1	12	28	12	23	12	19	16	27	16	9	15	10
hsa-miR-345-3p	Endogenous1	9	10	20	13	9	11	13	15	11	14	7	5
hsa-miR-345-5p	Endogenous1	12	21	19	28	6	25	23	34	14	15	9	11
hsa-miR-346	Endogenous1	10	26	16	25	10	16	19	17	18	18	32	22
hsa-miR-34a-5p	Endogenous1	22	586	677	63	24	975	367	504	156	28	14	19
hsa-miR-34b-3p	Endogenous1	19	12	20	22	9	14	23	10	16	13	19	8
hsa-miR-34c-3p	Endogenous1	12	20	49	16	7	32	16	27	19	13	7	8
hsa-miR-34c-5p	Endogenous1	19	44	626	37	9	422	66	83	18	9	15	21
hsa-miR-3605-3p	Endogenous1	10	3	9	10	5	3	4	6	6	5	4	4
hsa-miR-3605-5p	Endogenous1	19	12	13	20	19	16	21	23	14	17	23	12
hsa-miR-361-3p	Endogenous1	15	102	126	22	5	155	93	149	88	12	12	7
hsa-miR-361-5p	Endogenous1	11	229	434	74	11	305	244	545	216	7	15	10
hsa-miR-3613-3p	Endogenous1	8	7	4	15	14	10	13	1	9	13	12	7
hsa-miR-3613-5p	Endogenous1	9	8	8	9	10	10	9	5	8	10	5	2
hsa-miR-3614-3p	Endogenous1	7	8	8	23	11	15	11	11	9	9	10	16
hsa-miR-3614-5p	Endogenous1	16	23	22	14	21	21	16	17	17	26	23	15
hsa-miR-3615	Endogenous1	8	14	20	16	18	16	21	17	15	13	20	19
hsa-miR-362-3p	Endogenous1	5	11	33	16	5	35	32	40	23	8	8	10
hsa-miR-362-5p	Endogenous1	14	45	33	23	19	70	59	80	44	20	22	14
hsa-miR-363-3p	Endogenous1	20	57	189	37	29	106	73	114	60	28	28	16
hsa-miR-363-5p	Endogenous1	11	11	9	24	16	26	20	15	15	18	13	25
hsa-miR-365a-3p+hsa-miR-365b-3p	Endogenous1	17	104	194	39	30	113	136	295	124	26	12	10
hsa-miR-365b-5p	Endogenous1	16	20	12	39	17	29	25	21	19	14	15	20
hsa-miR-367-3p	Endogenous1	13	11	17	31	9	21	17	19	17	17	15	13
hsa-miR-369-3p	Endogenous1	21	16	19	28	19	16	30	29	19	34	22	13
hsa-miR-369-5p	Endogenous1	12	7	9	16	8	6	3	9	7	14	12	9
hsa-miR-3690	Endogenous1	19	18	21	36	14	32	26	22	23	18	20	25
hsa-miR-370-3p	Endogenous1	19	18	33	39	19	25	26	33	19	20	24	15
hsa-miR-370-5p	Endogenous1	14	13	19	33	14	21	17	20	12	21	20	18
hsa-miR-371a-5p	Endogenous1	16	22	17	13	20	15	13	22	22	12	12	8
hsa-miR-371b-5p	Endogenous1	16	18	15	14	9	20	16	15	12	16	14	15
hsa-miR-372-3p	Endogenous1	8	6	10	7	11	8	5	13	12	10	5	6
hsa-miR-373-3p	Endogenous1	7	14	13	10	7	6	16	14	15	8	13	4
hsa-miR-374a-3p	Endogenous1	10	13	9	15	11	12	9	16	8	14	6	19
hsa-miR-374a-5p	Endogenous1	58	2279	3072	596	18	1648	2843	4288	2071	19	29	21
hsa-miR-374b-5p	Endogenous1	16	126	182	55	18	127	132	224	91	23	18	18
hsa-miR-374c-5p	Endogenous1	10	17	15	26	18	17	17	22	13	10	13	5
hsa-miR-375	Endogenous1	11	27	24	30	11	32	19	23	16	20	13	17
hsa-miR-376a-2-5p	Endogenous1	12	11	10	15	11	16	11	18	12	10	18	6
hsa-miR-376a-3p	Endogenous1	37	179	581	104	28	376	673	1112	382	35	31	29
hsa-miR-376b-3p	Endogenous1	5	8	8	4	4	5	5	11	9	8	5	6
hsa-miR-376c-3p	Endogenous1	7	57	208	33	7	117	158	378	120	12	11	14
hsa-miR-376c-5p	Endogenous1	12	7	13	10	3	13	5	11	8	11	7	2
hsa-miR-377-3p	Endogenous1	13	56	108	28	10	91	134	261	70	13	12	18
hsa-miR-378b	Endogenous1	7	14	8	13	13	20	7	8	13	12	10	10
hsa-miR-378c	Endogenous1	11	15	12	16	13	6	15	10	4	15	6	11
hsa-miR-378d	Endogenous1	11	14	30	32	17	27	42	49	21	28	24	9
hsa-miR-378e	Endogenous1	1	1	1	1	1	1	1	1	1	1	1	1
hsa-miR-378f	Endogenous1	12	13	21	23	15	17	12	25	15	26	17	18
hsa-miR-378g	Endogenous1	15	120	86	33	17	138	115	130	66	28	16	17
hsa-miR-378h	Endogenous1	18	17	13	29	13	18	19	21	8	12	16	6
hsa-miR-378i	Endogenous1	22	109	117	39	30	514	214	277	87	20	15	15
hsa-miR-379-5p	Endogenous1	13	82	137	36	12	118	174	300	98	13	15	14
hsa-miR-380-3p	Endogenous1	12	7	9	16	9	9	8	13	11	11	7	7
hsa-miR-381-3p	Endogenous1	8	22	41	13	14	30	44	97	30	12	16	10
hsa-miR-381-5p	Endogenous1	6	7	9	17	7	12	13	10	6	11	7	13
hsa-miR-382-3p	Endogenous1	5	6	14	15	16	10	14	8	18	19	11	14
hsa-miR-382-5p	Endogenous1	13	69	60	41	12	83	122	225	95	15	9	7
hsa-miR-383-5p	Endogenous1	7	12	16	13	10	20	13	14	7	6	7	7
hsa-miR-384	Endogenous1	10	7	15	21	9	21	4	16	11	13	13	9
hsa-miR-3916	Endogenous1	8	7	8	9	6	21	9	10	10	11	7	10
hsa-miR-3918	Endogenous1	14	17	10	28	9	22	12	18	8	15	8	9
hsa-miR-3928-3p	Endogenous1	14	24	22	22	15	27	18	27	17	16	9	15
hsa-miR-3934-5p	Endogenous1	13	9	13	22	10	12	13	17	15	7	13	14
hsa-miR-409-3p	Endogenous1	12	27	22	17	7	25	24	53	16	8	9	13
hsa-miR-409-5p	Endogenous1	4	6	9	4	5	8	12	3	5	7	7	5
hsa-miR-410-3p	Endogenous1	12	10	6	24	12	10	9	26	12	14	9	12
hsa-miR-411-5p	Endogenous1	5	50	89	20	5	56	82	134	57	8	1	10
hsa-miR-412-3p	Endogenous1	14	10	8	14	14	8	10	24	10	14	9	9
hsa-miR-421	Endogenous1	14	35	22	21	20	29	32	38	21	22	28	16
hsa-miR-422a	Endogenous1	1	1	1	1	1	1	1	1	1	1	1	1
hsa-miR-423-3p	Endogenous1	4	39	40	18	13	42	19	39	25	11	19	13
hsa-miR-423-5p	Endogenous1	9	68	126	23	21	68	43	99	34	12	19	8
hsa-miR-424-5p	Endogenous1	226	1557	9989	2094	20	5847	7527	22160	13016	12	28	24
hsa-miR-425-5p	Endogenous1	6	35	53	21	13	78	34	32	14	8	7	15
hsa-miR-4284	Endogenous1	13	13	11	16	15	11	9	17	10	24	16	8
hsa-miR-4286	Endogenous1	24	49	66	24	20	97	92	114	35	27	23	12
hsa-miR-429	Endogenous1	12	90	64	24	15	85	28	42	28	13	16	11
hsa-miR-431-5p	Endogenous1	13	18	19	21	12	19	12	15	7	15	12	17
hsa-miR-432-5p	Endogenous1	8	25	13	12	16	24	15	35	12	7	11	11
hsa-miR-433-3p	Endogenous1	8	10	8	8	9	19	16	23	6	8	5	9
hsa-miR-433-5p	Endogenous1	11	12	12	19	17	19	18	16	13	11	13	10
hsa-miR-4421	Endogenous1	11	15	17	19	13	15	19	12	10	9	13	12
hsa-miR-4425	Endogenous1	8	16	7	20	17	18	7	19	14	8	7	10
hsa-miR-4431	Endogenous1	6	8	6	11	15	16	7	7	13	9	12	7
hsa-miR-4435	Endogenous1	8	10	7	19	8	15	15	16	13	12	9	12
hsa-miR-4443	Endogenous1	17	61	61	22	24	42	37	55	23	20	7	8
hsa-miR-4448	Endogenous1	9	10	7	17	4	5	9	6	23	11	11	6
hsa-miR-4451	Endogenous1	15	10	15	23	9	15	13	17	10	19	10	8
hsa-miR-4454+hsa-miR-7975	Endogenous1	663	48175	24975	6459	2510	16492	21434	34976	16846	376	1921	3653
hsa-miR-4455	Endogenous1	9	17	15	9	9	12	16	17	14	12	12	9
hsa-miR-4458	Endogenous1	17	5	13	31	11	19	19	7	14	12	15	5
hsa-miR-4461	Endogenous1	16	11	12	20	13	17	10	16	15	12	13	10
hsa-miR-448	Endogenous1	13	12	14	17	12	17	16	27	16	26	20	11
hsa-miR-4485-3p	Endogenous1	8	7	14	17	16	8	10	18	21	8	12	6
hsa-miR-4488	Endogenous1	7	28	28	35	17	25	21	32	12	20	18	15
hsa-miR-449a	Endogenous1	13	16	9	9	7	27	17	14	7	10	7	6
hsa-miR-449b-5p	Endogenous1	21	14	15	15	25	18	19	28	17	17	10	14
hsa-miR-449c-5p	Endogenous1	9	7	10	21	10	19	18	10	5	13	16	13
hsa-miR-450a-1-3p	Endogenous1	10	13	13	27	12	28	24	28	14	13	11	18
hsa-miR-450a-2-3p	Endogenous1	15	8	24	21	19	23	28	23	11	25	17	15
hsa-miR-450a-5p	Endogenous1	28	770	1616	127	11	489	730	2926	910	9	9	7
hsa-miR-450b-3p	Endogenous1	7	14	19	25	11	15	24	17	14	11	15	8
hsa-miR-450b-5p	Endogenous1	14	50	81	26	8	33	45	77	42	13	14	7
hsa-miR-4516	Endogenous1	9	39	28	14	19	17	23	23	16	10	17	9
hsa-miR-451a	Endogenous1	651	4422	54270	2161	120	17755	11029	28918	7498	21	163	76
hsa-miR-452-5p	Endogenous1	5	8	7	15	9	6	10	12	3	6	3	9
hsa-miR-4521	Endogenous1	13	23	19	29	12	32	23	20	18	16	14	23
hsa-miR-4524a-5p	Endogenous1	4	7	3	11	4	6	11	7	5	15	3	7
hsa-miR-4531	Endogenous1	17	15	14	9	8	21	10	16	17	14	10	7
hsa-miR-4532	Endogenous1	10	10	21	14	12	11	9	18	14	17	17	5
hsa-miR-4536-3p	Endogenous1	13	11	10	22	23	17	15	17	17	16	13	9
hsa-miR-4536-5p	Endogenous1	11	18	25	23	20	16	13	18	17	14	12	13
hsa-miR-454-3p	Endogenous1	7	47	64	18	13	43	49	68	33	22	6	9
hsa-miR-455-3p	Endogenous1	3	8	13	7	5	16	10	48	5	3	4	4
hsa-miR-455-5p	Endogenous1	13	210	799	46	13	353	347	1425	489	22	20	19
hsa-miR-4647	Endogenous1	18	15	8	27	23	14	14	19	17	16	18	14
hsa-miR-4707-3p	Endogenous1	12	10	16	26	7	4	19	7	12	18	7	12
hsa-miR-4707-5p	Endogenous1	24	10	19	28	21	27	24	19	28	20	12	23
hsa-miR-4741	Endogenous1	13	14	7	20	8	14	15	20	13	13	7	14
hsa-miR-4755-5p	Endogenous1	16	12	14	28	15	20	18	19	14	10	12	6
hsa-miR-4787-3p	Endogenous1	5	10	1	21	10	7	9	5	13	18	13	11
hsa-miR-4787-5p	Endogenous1	16	22	29	23	17	19	15	23	16	23	14	16
hsa-miR-4792	Endogenous1	9	8	12	16	12	15	15	14	13	15	18	3
hsa-miR-483-3p	Endogenous1	17	20	24	15	6	14	13	22	14	7	13	15
hsa-miR-483-5p	Endogenous1	10	7	7	13	4	15	12	10	10	8	11	7
hsa-miR-484	Endogenous1	5	21	17	30	13	19	15	21	14	11	15	8
hsa-miR-485-3p	Endogenous1	13	10	31	21	11	24	23	33	17	10	18	19
hsa-miR-485-5p	Endogenous1	4	9	10	16	10	10	18	13	10	14	15	11
hsa-miR-486-3p	Endogenous1	4	11	10	11	7	22	12	19	13	15	10	11
hsa-miR-487a-3p	Endogenous1	11	10	22	17	13	17	20	42	18	7	23	12
hsa-miR-487b-3p	Endogenous1	4	6	11	3	4	13	10	28	10	5	4	3
hsa-miR-487b-5p	Endogenous1	18	8	19	19	19	15	16	16	14	17	13	10
hsa-miR-488-3p	Endogenous1	8	30	12	25	9	15	9	19	11	9	14	8
hsa-miR-489-3p	Endogenous1	10	12	28	9	9	14	10	22	15	8	9	6
hsa-miR-490-3p	Endogenous1	10	5	17	12	9	7	11	17	10	7	7	9
hsa-miR-490-5p	Endogenous1	9	10	15	23	8	21	16	15	14	19	18	17
hsa-miR-491-3p	Endogenous1	12	13	9	30	20	10	20	12	25	16	16	16
hsa-miR-491-5p	Endogenous1	19	41	58	32	17	48	24	46	29	14	15	31
hsa-miR-492	Endogenous1	14	12	12	27	10	20	14	17	7	9	13	15
hsa-miR-493-3p	Endogenous1	12	34	34	28	25	42	41	27	35	18	16	25
hsa-miR-494-3p	Endogenous1	1	1	1	1	1	1	1	1	1	1	1	1
hsa-miR-494-5p	Endogenous1	3	1	4	8	4	5	5	3	11	7	3	7
hsa-miR-495-3p	Endogenous1	24	189	211	105	31	237	405	845	310	22	19	17
hsa-miR-495-5p	Endogenous1	11	12	15	21	15	19	16	31	18	17	19	12
hsa-miR-496	Endogenous1	2	5	5	8	2	7	4	6	3	6	6	3
hsa-miR-497-5p	Endogenous1	24	59	166	121	25	606	412	567	191	24	27	20
hsa-miR-498	Endogenous1	6	3	8	7	5	6	8	8	4	10	10	2
hsa-miR-499a-3p	Endogenous1	13	18	17	17	18	26	15	25	21	20	20	17
hsa-miR-499a-5p	Endogenous1	11	23	23	42	14	23	23	35	19	18	18	26
hsa-miR-499b-3p	Endogenous1	11	11	11	18	8	15	10	13	10	17	12	8
hsa-miR-499b-5p	Endogenous1	10	10	20	14	16	18	12	15	15	18	6	9
hsa-miR-5001-3p	Endogenous1	8	8	7	3	7	3	5	4	3	8	6	2
hsa-miR-5001-5p	Endogenous1	14	6	13	12	12	16	20	19	14	18	12	6
hsa-miR-500a-5p+hsa-miR-501-5p	Endogenous1	6	45	34	26	12	44	48	59	32	16	10	12
hsa-miR-501-3p	Endogenous1	1	6	5	8	10	9	4	9	9	4	6	8
hsa-miR-5010-3p	Endogenous1	16	13	19	22	13	17	20	17	18	22	11	19
hsa-miR-5010-5p	Endogenous1	12	16	10	27	10	17	13	7	9	21	19	21
hsa-miR-502-3p	Endogenous1	11	17	12	24	12	14	25	13	14	13	23	19
hsa-miR-502-5p	Endogenous1	1	1	1	1	1	1	1	1	1	1	1	1
hsa-miR-503-3p	Endogenous1	14	13	19	8	11	12	16	10	10	15	8	11
hsa-miR-503-5p	Endogenous1	19	257	317	45	23	153	165	376	205	11	18	11
hsa-miR-504-3p	Endogenous1	2	5	12	20	14	16	14	12	12	10	16	16
hsa-miR-504-5p	Endogenous1	16	19	36	34	11	30	28	31	21	23	13	12
hsa-miR-505-3p	Endogenous1	11	68	74	39	10	56	59	92	47	11	9	17
hsa-miR-506-3p	Endogenous1	18	30	55	44	23	42	30	41	23	29	16	18
hsa-miR-506-5p	Endogenous1	11	13	10	14	18	12	21	18	16	16	13	14
hsa-miR-507	Endogenous1	4	10	19	15	13	10	12	12	6	13	18	15
hsa-miR-508-3p	Endogenous1	6	4	10	12	11	12	12	8	7	8	11	9
hsa-miR-508-5p	Endogenous1	10	12	9	10	13	8	13	12	6	14	13	6
hsa-miR-509-3-5p	Endogenous1	9	10	14	12	8	13	14	12	9	12	17	10
hsa-miR-509-3p	Endogenous1	7	5	20	11	4	8	13	16	12	9	7	4
hsa-miR-509-5p	Endogenous1	19	22	18	43	19	30	29	19	10	32	20	18
hsa-miR-510-3p	Endogenous1	22	10	9	30	12	16	23	15	12	22	23	10
hsa-miR-510-5p	Endogenous1	9	6	12	16	6	16	11	12	9	9	4	6
hsa-miR-511-5p	Endogenous1	7	15	15	18	11	17	16	12	11	17	10	12
hsa-miR-512-3p	Endogenous1	2	6	8	8	7	6	10	3	5	4	5	4
hsa-miR-512-5p	Endogenous1	20	25	13	15	14	16	17	22	16	23	14	16
hsa-miR-513a-3p	Endogenous1	11	14	9	16	10	6	9	12	15	20	11	6
hsa-miR-513a-5p	Endogenous1	6	14	13	13	13	16	10	12	13	6	11	10
hsa-miR-513b-5p	Endogenous1	13	11	35	22	22	16	19	35	19	15	18	16
hsa-miR-513c-3p	Endogenous1	4	10	10	11	3	3	6	13	6	12	10	10
hsa-miR-513c-5p	Endogenous1	10	11	11	26	19	13	12	14	18	16	16	12
hsa-miR-514a-3p	Endogenous1	30	29	28	31	44	20	29	27	28	32	22	21
hsa-miR-514a-5p	Endogenous1	15	19	43	33	17	34	23	40	16	14	10	17
hsa-miR-514b-3p	Endogenous1	16	9	13	15	10	17	11	10	9	12	13	18
hsa-miR-514b-5p	Endogenous1	14	15	38	20	22	29	33	63	32	25	25	17
hsa-miR-515-3p	Endogenous1	6	16	12	19	12	14	10	9	23	12	7	7
hsa-miR-515-5p	Endogenous1	9	15	16	45	10	34	24	23	20	20	11	18
hsa-miR-516a-3p+hsa-miR-516b-3p	Endogenous1	10	19	14	10	12	19	17	16	13	17	21	7
hsa-miR-516a-5p	Endogenous1	9	14	11	18	11	18	4	6	13	7	13	9
hsa-miR-516b-5p	Endogenous1	24	20	15	42	15	37	14	20	24	19	21	20
hsa-miR-517a-3p	Endogenous1	11	20	23	29	12	17	16	20	19	18	8	15
hsa-miR-517b-3p	Endogenous1	9	7	8	16	17	12	7	11	6	6	6	7
hsa-miR-517c-3p+hsa-miR-519a-3p	Endogenous1	16	17	18	23	25	25	20	22	13	27	21	19
hsa-miR-518b	Endogenous1	15	53	62	47	13	78	64	132	46	12	15	13
hsa-miR-518c-3p	Endogenous1	11	11	15	23	11	21	16	13	11	10	11	14
hsa-miR-518d-3p	Endogenous1	19	16	15	21	16	27	13	14	18	13	13	16
hsa-miR-518e-3p	Endogenous1	8	13	4	7	15	7	12	8	5	14	12	11
hsa-miR-518f-3p	Endogenous1	14	29	26	17	23	20	25	15	22	13	13	20
hsa-miR-5196-3p+hsa-miR-6732-3p	Endogenous1	14	33	37	17	14	25	41	39	14	15	9	10
hsa-miR-5196-5p	Endogenous1	8	11	9	22	17	16	21	14	14	15	14	9
hsa-miR-519b-3p	Endogenous1	19	16	23	48	22	33	20	20	19	19	23	26
hsa-miR-519b-5p+hsa-miR-519c-5p+hsa-miR-523-5p+hsa-miR-518e-5p+hsa-miR-522-5p+hsa-miR-519a-5p	Endogenous1	12	14	7	21	3	13	7	14	9	14	8	12
hsa-miR-519c-3p	Endogenous1	9	9	10	14	12	19	15	16	15	22	17	9
hsa-miR-519d-3p	Endogenous1	12	12	13	9	13	11	10	9	7	18	9	10
hsa-miR-519e-3p	Endogenous1	17	13	14	28	11	22	20	24	19	20	15	27
hsa-miR-520a-3p	Endogenous1	7	4	4	5	1	9	8	8	4	9	8	15
hsa-miR-520a-5p	Endogenous1	12	19	20	19	17	18	20	24	18	21	14	12
hsa-miR-520b	Endogenous1	3	4	5	16	6	6	2	8	4	3	2	1
hsa-miR-520c-3p	Endogenous1	11	22	18	15	8	25	6	17	16	11	9	14
hsa-miR-520d-3p	Endogenous1	11	21	10	18	13	19	15	23	13	14	11	8
hsa-miR-520d-5p+hsa-miR-527+hsa-miR-518a-5p	Endogenous1	7	15	12	17	12	17	27	13	10	11	10	11
hsa-miR-520e	Endogenous1	9	12	7	14	10	11	14	4	6	6	11	4
hsa-miR-520f-3p	Endogenous1	4	8	6	22	2	10	2	1	2	1	1	8
hsa-miR-520g-3p	Endogenous1	18	8	13	15	9	7	14	14	7	12	11	16
hsa-miR-520h	Endogenous1	13	14	6	18	14	17	17	24	4	17	10	19
hsa-miR-521	Endogenous1	10	12	5	16	12	5	12	14	3	13	15	9
hsa-miR-522-3p	Endogenous1	14	31	26	22	21	17	7	17	14	13	9	12
hsa-miR-523-3p	Endogenous1	11	12	5	23	10	16	13	13	15	15	10	19
hsa-miR-524-3p	Endogenous1	17	11	14	30	12	17	14	20	14	18	14	18
hsa-miR-525-3p	Endogenous1	15	18	15	36	9	10	17	28	24	22	13	26
hsa-miR-525-5p	Endogenous1	19	15	20	37	26	16	22	25	23	22	16	20
hsa-miR-526a+hsa-miR-518c-5p+hsa-miR-518d-5p	Endogenous1	27	28	30	46	19	38	37	36	22	31	25	32
hsa-miR-526b-5p	Endogenous1	11	26	10	28	21	17	18	14	11	18	12	12
hsa-miR-532-3p	Endogenous1	21	9	17	35	29	19	24	24	22	25	25	12
hsa-miR-532-5p	Endogenous1	16	24	18	36	14	50	34	45	23	16	22	18
hsa-miR-539-3p	Endogenous1	9	6	5	18	11	14	10	20	10	15	12	6
hsa-miR-539-5p	Endogenous1	13	48	28	37	17	40	26	31	12	13	18	25
hsa-miR-541-3p	Endogenous1	3	8	5	13	10	3	13	12	9	12	9	6
hsa-miR-542-3p	Endogenous1	11	35	40	29	21	31	27	56	21	26	15	13
hsa-miR-542-5p	Endogenous1	15	12	22	18	9	19	24	33	23	15	10	9
hsa-miR-543	Endogenous1	26	95	85	37	22	103	134	345	80	23	25	19
hsa-miR-544a	Endogenous1	13	9	12	20	13	16	16	14	12	5	9	11
hsa-miR-545-3p	Endogenous1	8	18	22	29	12	31	33	37	16	14	6	16
hsa-miR-548a-3p	Endogenous1	8	3	11	13	9	10	10	7	4	3	5	3
hsa-miR-548a-5p	Endogenous1	15	14	22	20	28	16	22	22	21	19	21	18
hsa-miR-548aa+hsa-miR-548t-3p	Endogenous1	1	1	1	1	1	1	1	1	1	1	1	1
hsa-miR-548ad-3p	Endogenous1	11	6	9	17	14	18	11	12	11	17	8	11
hsa-miR-548ah-5p	Endogenous1	23	23	18	18	18	33	17	26	21	22	18	12
hsa-miR-548ai+hsa-miR-570-5p	Endogenous1	7	6	2	10	5	3	14	7	8	7	5	4
hsa-miR-548ak	Endogenous1	9	13	8	19	16	14	13	16	12	13	19	10
hsa-miR-548al	Endogenous1	8	17	21	25	16	30	20	25	20	17	19	20
hsa-miR-548ar-3p	Endogenous1	22	13	19	26	22	15	19	14	14	22	22	10
hsa-miR-548ar-5p	Endogenous1	1	1	1	1	1	17	1	1	1	1	1	1
hsa-miR-548b-3p	Endogenous1	3	1	3	4	4	4	3	14	6	4	1	7
hsa-miR-548c-5p+hsa-miR-548o-5p+hsa-miR-548am-5p	Endogenous1	5	4	4	11	6	7	6	11	5	7	6	6
hsa-miR-548d-3p	Endogenous1	7	7	11	14	10	8	10	11	6	7	7	9
hsa-miR-548d-5p	Endogenous1	14	25	27	24	19	21	25	50	23	18	19	16
hsa-miR-548e-3p	Endogenous1	5	4	1	16	2	5	1	1	1	8	7	5
hsa-miR-548e-5p	Endogenous1	38	27	29	41	40	27	27	34	18	42	29	25
hsa-miR-548g-3p	Endogenous1	13	6	21	23	29	22	20	16	14	29	20	13
hsa-miR-548h-5p	Endogenous1	10	6	1	10	8	8	5	8	6	7	12	10
hsa-miR-548i	Endogenous1	9	12	12	10	6	17	7	13	16	15	9	6
hsa-miR-548j-3p	Endogenous1	20	21	16	28	23	35	30	22	12	22	19	25
hsa-miR-548j-5p	Endogenous1	11	14	9	18	12	17	8	10	8	11	7	11
hsa-miR-548k	Endogenous1	17	32	20	22	24	28	15	31	17	18	26	16
hsa-miR-548l	Endogenous1	10	13	7	21	13	19	15	17	6	10	15	7
hsa-miR-548m	Endogenous1	18	34	40	39	19	33	32	39	23	23	27	14
hsa-miR-548n	Endogenous1	10	9	14	24	17	33	31	28	17	11	19	19
hsa-miR-548o-3p+hsa-miR-548ah-3p+hsa-miR-548av-3p	Endogenous1	20	13	7	36	18	34	18	28	8	18	14	21
hsa-miR-548q	Endogenous1	11	8	3	7	9	12	4	8	3	6	4	5
hsa-miR-548v	Endogenous1	12	10	13	19	15	17	16	17	14	17	8	13
hsa-miR-548y	Endogenous1	19	25	16	31	28	19	18	31	21	25	22	13
hsa-miR-548z+hsa-miR-548h-3p	Endogenous1	9	24	20	27	16	59	15	15	12	14	18	13
hsa-miR-549a	Endogenous1	12	9	11	17	9	14	9	14	10	14	11	10
hsa-miR-550a-5p	Endogenous1	2	7	3	14	9	9	3	3	3	3	3	6
hsa-miR-551a	Endogenous1	20	22	3	42	20	15	18	11	19	15	12	9
hsa-miR-551b-3p	Endogenous1	20	33	24	30	28	37	38	25	14	18	15	19
hsa-miR-552-3p	Endogenous1	29	16	17	15	16	17	15	11	16	19	17	13
hsa-miR-553	Endogenous1	10	7	7	19	14	20	13	11	12	15	9	15
hsa-miR-554	Endogenous1	10	7	5	7	10	6	8	11	13	11	10	5
hsa-miR-555	Endogenous1	10	17	12	22	7	14	13	15	11	16	12	4
hsa-miR-556-3p	Endogenous1	6	5	7	28	9	12	17	10	10	23	14	19
hsa-miR-556-5p	Endogenous1	8	7	8	12	9	6	7	9	12	12	5	9
hsa-miR-561-3p	Endogenous1	14	15	4	26	6	14	14	11	17	12	12	18
hsa-miR-561-5p	Endogenous1	12	12	17	28	20	10	20	20	11	17	12	9
hsa-miR-562	Endogenous1	9	12	11	17	11	5	9	3	7	12	3	16
hsa-miR-563	Endogenous1	20	18	20	27	19	15	23	24	15	29	24	13
hsa-miR-564	Endogenous1	16	15	17	19	14	18	23	24	13	13	18	7
hsa-miR-566	Endogenous1	19	13	5	23	21	14	15	22	12	12	13	12
hsa-miR-567	Endogenous1	7	10	10	24	10	31	20	16	10	19	17	18
hsa-miR-568	Endogenous1	16	14	16	36	10	24	18	14	11	13	14	17
hsa-miR-570-3p	Endogenous1	1	1	1	1	1	1	1	1	1	1	1	1
hsa-miR-571	Endogenous1	6	7	8	11	6	8	11	6	13	12	9	10
hsa-miR-572	Endogenous1	10	9	13	21	12	11	20	19	15	16	16	10
hsa-miR-573	Endogenous1	6	6	9	19	7	7	7	16	12	10	6	8
hsa-miR-574-3p	Endogenous1	15	57	125	24	19	85	99	239	90	21	19	9
hsa-miR-574-5p	Endogenous1	14	79	73	22	19	141	93	112	58	12	18	16
hsa-miR-575	Endogenous1	17	23	22	34	23	47	26	27	22	20	28	16
hsa-miR-576-3p	Endogenous1	7	12	13	13	13	17	9	13	12	14	9	12
hsa-miR-576-5p	Endogenous1	16	12	19	27	8	27	20	16	18	12	17	14
hsa-miR-577	Endogenous1	14	24	24	18	6	21	17	38	13	11	13	8
hsa-miR-578	Endogenous1	19	14	14	28	12	26	18	22	18	16	11	19
hsa-miR-579-3p	Endogenous1	1	1	1	1	1	1	1	1	1	1	1	1
hsa-miR-579-5p	Endogenous1	12	10	14	15	15	15	21	19	16	15	19	11
hsa-miR-580-3p	Endogenous1	8	9	9	25	5	21	9	7	14	12	9	12
hsa-miR-582-3p	Endogenous1	19	13	23	9	20	15	23	21	8	19	12	8
hsa-miR-582-5p	Endogenous1	19	61	49	25	30	57	34	62	24	40	28	15
hsa-miR-584-3p	Endogenous1	29	17	22	40	27	24	42	27	25	24	31	20
hsa-miR-584-5p	Endogenous1	22	10	12	25	18	13	14	20	15	19	17	13
hsa-miR-585-3p	Endogenous1	16	12	20	22	16	17	21	34	13	27	18	14
hsa-miR-587	Endogenous1	12	11	17	22	5	15	19	21	17	15	6	7
hsa-miR-589-5p	Endogenous1	8	12	13	10	4	10	21	17	16	12	16	9
hsa-miR-590-3p	Endogenous1	2	14	7	9	8	4	4	8	11	11	6	7
hsa-miR-590-5p	Endogenous1	15	27	46	15	8	33	40	49	12	8	7	11
hsa-miR-591	Endogenous1	15	13	13	20	8	14	17	23	12	16	16	13
hsa-miR-592	Endogenous1	9	22	28	21	16	26	22	32	19	10	16	10
hsa-miR-593-3p	Endogenous1	30	28	27	29	16	23	34	35	22	17	18	7
hsa-miR-595	Endogenous1	11	14	11	21	18	11	14	16	12	10	10	23
hsa-miR-596	Endogenous1	19	13	19	39	7	27	27	15	15	16	12	26
hsa-miR-597-5p	Endogenous1	14	21	31	22	9	20	12	18	17	21	23	16
hsa-miR-598-3p	Endogenous1	12	23	35	23	15	44	33	45	36	29	14	14
hsa-miR-599	Endogenous1	5	10	14	10	6	9	4	2	13	7	12	9
hsa-miR-600	Endogenous1	11	10	13	14	16	9	9	14	9	17	11	6
hsa-miR-601	Endogenous1	8	6	5	19	6	15	4	10	11	14	9	9
hsa-miR-603	Endogenous1	1	1	1	1	1	1	1	1	1	1	1	1
hsa-miR-604	Endogenous1	2	5	5	4	2	2	2	5	3	4	5	5
hsa-miR-605-5p	Endogenous1	10	12	10	19	12	10	12	9	15	13	15	11
hsa-miR-606	Endogenous1	10	11	10	23	10	19	13	14	14	9	14	12
hsa-miR-607	Endogenous1	22	20	27	29	30	21	23	32	19	22	25	17
hsa-miR-608	Endogenous1	10	23	17	39	20	37	38	31	25	21	26	22
hsa-miR-610	Endogenous1	17	16	10	19	7	23	17	23	10	13	10	19
hsa-miR-612	Endogenous1	44	49	35	48	36	57	52	36	33	57	35	31
hsa-miR-613	Endogenous1	10	9	12	16	8	14	17	14	9	18	12	18
hsa-miR-614	Endogenous1	7	12	11	15	16	9	7	12	9	12	9	11
hsa-miR-615-3p	Endogenous1	15	10	9	18	13	12	7	15	13	13	20	10
hsa-miR-615-5p	Endogenous1	7	10	3	30	5	14	26	5	3	13	14	13
hsa-miR-616-3p	Endogenous1	13	10	21	15	12	16	14	16	8	15	11	9
hsa-miR-617	Endogenous1	5	5	18	20	7	19	19	13	10	16	6	6
hsa-miR-619-3p	Endogenous1	12	8	6	16	11	17	14	21	9	13	7	16
hsa-miR-620	Endogenous1	13	10	14	13	9	8	8	12	9	20	7	7
hsa-miR-624-3p	Endogenous1	10	14	9	15	8	10	10	12	16	6	13	11
hsa-miR-625-5p	Endogenous1	9	13	16	19	8	24	18	24	12	15	10	13
hsa-miR-626	Endogenous1	20	14	16	25	24	19	21	22	22	16	9	13
hsa-miR-627-3p	Endogenous1	21	17	17	33	20	22	25	29	20	26	32	18
hsa-miR-627-5p	Endogenous1	1	1	1	1	1	1	1	1	1	1	1	1
hsa-miR-628-3p	Endogenous1	12	14	19	20	8	22	16	19	7	15	11	13
hsa-miR-628-5p	Endogenous1	15	39	33	13	7	42	33	50	27	9	15	4
hsa-miR-629-5p	Endogenous1	13	21	21	26	22	23	18	11	9	18	21	18
hsa-miR-630	Endogenous1	12	16	6	16	10	18	10	8	9	17	16	8
hsa-miR-631	Endogenous1	10	9	15	18	10	18	8	14	10	14	12	15
hsa-miR-637	Endogenous1	4	6	5	5	2	4	6	2	7	4	12	3
hsa-miR-638	Endogenous1	7	3	8	20	6	16	5	11	4	11	9	6
hsa-miR-639	Endogenous1	21	17	17	16	13	19	15	14	12	12	17	16
hsa-miR-640	Endogenous1	7	6	21	13	16	25	23	21	14	17	17	8
hsa-miR-641	Endogenous1	3	3	7	5	5	6	4	8	7	4	5	4
hsa-miR-642a-3p	Endogenous1	8	15	4	9	10	14	10	6	7	10	11	7
hsa-miR-642a-5p	Endogenous1	8	44	29	18	15	83	36	44	22	24	22	9
hsa-miR-643	Endogenous1	10	11	15	14	10	15	12	8	10	17	9	6
hsa-miR-644a	Endogenous1	11	12	14	14	11	27	20	12	15	19	12	15
hsa-miR-648	Endogenous1	16	9	7	25	5	7	11	12	7	14	12	12
hsa-miR-649	Endogenous1	12	6	11	26	14	14	16	12	9	13	7	17
hsa-miR-650	Endogenous1	11	18	7	22	19	16	17	21	12	9	19	12
hsa-miR-6503-3p	Endogenous1	14	9	15	22	14	19	17	23	10	17	18	11
hsa-miR-6503-5p	Endogenous1	14	15	17	36	24	24	25	24	13	23	18	13
hsa-miR-651-3p	Endogenous1	4	9	6	14	2	9	11	8	6	13	13	7
hsa-miR-651-5p	Endogenous1	9	14	24	20	9	26	25	25	25	24	20	11
hsa-miR-6511a-3p	Endogenous1	12	8	8	12	11	10	18	17	17	12	14	8
hsa-miR-6511a-5p	Endogenous1	7	9	5	16	11	7	5	6	9	11	9	9
hsa-miR-652-3p	Endogenous1	5	13	11	7	3	17	12	12	3	2	4	6
hsa-miR-652-5p	Endogenous1	5	4	5	7	3	8	7	5	5	9	5	5
hsa-miR-654-3p	Endogenous1	8	12	11	16	7	26	14	23	7	17	9	17
hsa-miR-654-5p	Endogenous1	11	12	14	16	10	4	10	22	8	14	9	10
hsa-miR-655-3p	Endogenous1	4	16	16	21	7	12	7	16	14	17	14	8
hsa-miR-656-3p	Endogenous1	15	21	26	35	12	24	26	50	26	23	11	11
hsa-miR-660-3p	Endogenous1	15	22	11	28	15	21	26	19	19	18	17	9
hsa-miR-660-5p	Endogenous1	12	61	76	20	12	80	82	84	44	13	8	12
hsa-miR-661	Endogenous1	11	14	18	23	12	15	24	15	12	22	15	15
hsa-miR-663a	Endogenous1	11	9	10	12	9	8	13	10	6	23	13	9
hsa-miR-664a-3p	Endogenous1	18	50	156	42	21	84	51	115	60	29	20	15
hsa-miR-664b-3p	Endogenous1	11	17	18	15	10	43	16	15	6	9	17	10
hsa-miR-664b-5p	Endogenous1	3	4	6	10	6	10	10	11	4	2	8	9
hsa-miR-665	Endogenous1	14	8	10	20	12	5	15	21	7	11	17	15
hsa-miR-671-3p	Endogenous1	4	12	7	13	7	20	14	6	8	13	2	11
hsa-miR-671-5p	Endogenous1	12	14	16	19	16	13	19	18	10	22	21	19
hsa-miR-6720-3p	Endogenous1	8	11	9	18	13	17	11	11	10	5	9	12
hsa-miR-6721-5p	Endogenous1	18	23	27	33	27	20	23	32	19	18	22	19
hsa-miR-6724-5p	Endogenous1	17	26	25	33	15	21	24	19	18	21	22	14
hsa-miR-675-5p	Endogenous1	6	12	4	5	6	6	10	8	6	4	9	5
hsa-miR-7-5p	Endogenous1	8	32	22	21	5	61	75	35	19	12	11	8
hsa-miR-708-5p	Endogenous1	1	3	5	5	3	13	7	5	7	10	3	6
hsa-miR-744-5p	Endogenous1	9	7	12	20	11	11	17	10	13	6	11	21
hsa-miR-758-3p+hsa-miR-411-3p	Endogenous1	11	19	19	18	14	18	15	33	15	5	7	7
hsa-miR-758-5p	Endogenous1	14	16	13	18	8	13	13	11	9	8	9	11
hsa-miR-760	Endogenous1	12	10	19	22	16	14	9	8	8	14	16	6
hsa-miR-761	Endogenous1	12	14	19	14	12	14	17	9	11	16	15	12
hsa-miR-764	Endogenous1	19	12	27	30	23	22	14	16	21	22	31	17
hsa-miR-765	Endogenous1	10	12	8	23	12	11	21	21	16	12	15	20
hsa-miR-766-3p	Endogenous1	1	6	4	6	6	1	6	7	6	4	4	4
hsa-miR-766-5p	Endogenous1	6	3	5	5	3	5	2	7	4	4	6	9
hsa-miR-767-3p	Endogenous1	10	9	6	26	11	15	15	12	14	8	12	11
hsa-miR-767-5p	Endogenous1	16	14	13	16	17	11	23	13	14	19	19	15
hsa-miR-769-3p	Endogenous1	14	10	14	20	9	15	5	3	15	17	20	8
hsa-miR-769-5p	Endogenous1	15	49	46	28	17	57	44	62	24	20	17	12
hsa-miR-770-5p	Endogenous1	8	5	13	10	13	8	4	9	8	13	20	6
hsa-miR-802	Endogenous1	15	16	17	20	20	24	21	22	20	32	14	15
hsa-miR-873-3p	Endogenous1	13	13	29	50	28	31	31	31	28	25	10	17
hsa-miR-873-5p	Endogenous1	6	5	12	14	5	17	14	13	5	6	5	11
hsa-miR-874-3p	Endogenous1	4	8	4	9	1	8	9	4	4	4	3	8
hsa-miR-874-5p	Endogenous1	19	30	20	23	6	34	34	32	24	18	15	22
hsa-miR-875-3p	Endogenous1	7	7	12	13	8	14	13	10	11	10	5	12
hsa-miR-876-3p	Endogenous1	17	7	15	21	13	13	20	16	14	16	12	19
hsa-miR-876-5p	Endogenous1	7	8	4	6	8	5	6	5	8	10	8	5
hsa-miR-877-5p	Endogenous1	5	12	19	17	6	13	15	19	20	9	12	4
hsa-miR-885-3p	Endogenous1	10	16	17	17	9	13	12	14	11	11	10	12
hsa-miR-885-5p	Endogenous1	5	6	7	9	3	9	5	8	4	6	3	2
hsa-miR-887-3p	Endogenous1	11	14	13	28	5	16	13	17	20	12	25	16
hsa-miR-887-5p	Endogenous1	21	12	9	21	13	19	12	17	18	16	21	11
hsa-miR-888-5p	Endogenous1	19	37	48	29	39	39	35	37	22	31	28	17
hsa-miR-889-3p	Endogenous1	13	27	36	24	12	12	24	38	25	18	8	11
hsa-miR-890	Endogenous1	12	14	13	36	13	38	23	16	16	17	18	25
hsa-miR-891a-5p	Endogenous1	21	19	33	27	22	18	28	27	22	24	22	22
hsa-miR-891b	Endogenous1	15	30	31	18	20	14	19	24	14	17	12	13
hsa-miR-892a	Endogenous1	18	14	16	33	19	25	26	16	16	17	14	25
hsa-miR-892b	Endogenous1	7	11	6	9	7	7	11	9	12	10	2	3
hsa-miR-9-5p	Endogenous1	11	82	143	80	5	254	243	506	202	8	5	6
hsa-miR-922	Endogenous1	21	8	15	27	18	19	16	17	19	30	21	17
hsa-miR-924	Endogenous1	5	4	5	12	3	5	2	6	5	3	5	6
hsa-miR-92a-1-5p	Endogenous1	7	6	14	11	11	12	15	5	12	9	4	6
hsa-miR-92a-3p	Endogenous1	13	22	43	36	17	36	35	53	23	10	18	10
hsa-miR-92b-3p	Endogenous1	9	7	18	13	21	13	18	24	15	16	17	7
hsa-miR-93-5p	Endogenous1	32	360	374	74	20	969	397	464	153	28	18	16
hsa-miR-933	Endogenous1	13	10	14	31	16	22	31	15	18	16	18	16
hsa-miR-934	Endogenous1	10	21	5	23	6	13	13	7	13	19	9	10
hsa-miR-935	Endogenous1	14	6	9	27	7	15	24	19	12	10	13	19
hsa-miR-936	Endogenous1	14	27	20	27	17	23	27	19	19	24	22	22
hsa-miR-937-3p	Endogenous1	18	7	14	9	14	23	18	10	17	23	13	7
hsa-miR-939-5p	Endogenous1	17	14	15	22	9	15	23	13	10	16	20	12
hsa-miR-940	Endogenous1	11	11	10	17	9	15	12	13	12	14	6	9
hsa-miR-941	Endogenous1	12	9	10	10	15	14	8	23	9	9	11	10
hsa-miR-942-3p	Endogenous1	5	8	13	25	7	15	10	7	11	7	13	14
hsa-miR-942-5p	Endogenous1	13	15	17	17	15	10	24	15	11	17	13	13
hsa-miR-944	Endogenous1	6	8	7	11	8	14	17	14	9	14	7	7
hsa-miR-95-3p	Endogenous1	18	62	43	30	33	77	58	55	41	33	17	7
hsa-miR-96-5p	Endogenous1	20	23	55	25	11	38	30	37	23	26	15	15
hsa-miR-98-3p	Endogenous1	10	7	11	29	14	21	12	14	13	20	14	17
hsa-miR-98-5p	Endogenous1	30	307	523	206	8	730	532	1336	609	9	13	8
hsa-miR-99a-5p	Endogenous1	41	1118	5951	1232	47	3769	3742	8668	4220	18	102	58
hsa-miR-99b-5p	Endogenous1	20	369	476	87	33	376	214	627	271	24	44	26
ACTB	Housekeeping	6034	531	1277	2060	2650	3471	2719	3229	5659	4649	3302	1370
B2M	Housekeeping	8148	6572	7882	15022	4266	17142	18921	11000	19223	10638	9489	4164
GAPDH	Housekeeping	6363	798	1095	1227	4524	4941	2341	2631	4140	4668	2968	826
RPL19	Housekeeping	5179	1553	2071	7719	2255	5430	4369	7291	7063	4894	4009	3893
RPLP0	Housekeeping	5709	746	1640	2589	3354	5000	2308	4001	4716	5782	3175	1466
LIG_NEG_A	Ligation	19	13	17	17	12	30	23	13	12	22	14	16
LIG_NEG_B	Ligation	16	20	13	32	15	25	25	18	12	36	15	25
LIG_NEG_C	Ligation	6	9	6	9	8	5	5	2	5	4	8	5
LIG_POS_A	Ligation	175	12638	16795	776	7697	38499	11403	12611	3589	1047	3152	1027
LIG_POS_B	Ligation	45	2595	3554	199	1579	7843	2240	2695	833	284	719	236
LIG_POS_C	Ligation	15	568	762	59	455	1705	510	532	150	43	145	63
NEG_A	Negative	10	18	19	19	9	15	15	10	15	14	9	17
NEG_B	Negative	14	5	14	6	18	7	13	12	13	12	10	11
NEG_C	Negative	23	16	32	22	18	32	33	29	17	23	18	16
NEG_D	Negative	10	12	8	13	14	12	11	13	14	11	9	6
NEG_E	Negative	16	18	21	17	13	22	18	27	15	16	17	22
NEG_F	Negative	23	16	20	33	19	16	24	28	16	30	15	16
NEG_G	Negative	3	4	11	4	5	6	2	6	2	10	5	2
NEG_H	Negative	14	7	9	15	9	20	11	16	13	15	16	6
POS_A	Positive	31577	28882	28104	33856	27871	17508	26509	18888	24282	24644	26336	25118
POS_B	Positive	10834	10045	9880	11923	10247	7149	9533	7034	9330	8926	9365	8963
POS_C	Positive	2653	2567	2373	2958	2542	1771	2359	1792	2414	2244	2365	2154
POS_D	Positive	514	490	445	522	414	273	432	343	403	373	435	406
POS_E	Positive	88	93	73	114	99	58	86	62	93	90	92	79
POS_F	Positive	77	97	69	97	59	58	56	52	47	65	77	68
ath-miR159a	SpikeIn	9	13	9	19	11	19	9	12	8	17	15	7
cel-miR-248	SpikeIn	9	10	5	9	9	4	10	11	13	13	17	13
cel-miR-254	SpikeIn	9	19	21	25	29	18	17	29	19	22	19	17
osa-miR414	SpikeIn	17	19	16	16	31	23	24	22	23	26	21	20
osa-miR442	SpikeIn	13	36	58	24	15	54	43	48	30	19	21	12

## Sheet: S1. normalization
Gene Name	Class Name	SS1673597	CT2	CT3	SS1701937	SS1700135	SS1675494	SS1700753	SS1675199	SS1674064	SS1702430	SS1701944	SS1673764
		HPV-C-	HPV-C-	HPV-C-	HPV-C+	HPV-C+	HPV-C+	HPV+C-	HPV+C-	HPV+C-	HPV+C+	HPV+C+	HPV+C+
		NN1	NN2	NN3	NC1	NC2	NC3	PN1	PN2	PN3	PC1	PC2	PC3
hsa-let-7a-5p	Endogenous1	442.67	32609.6	59761.5	4090.92	3.72	12114.4	1	241.78	2.18	14918.9	40176.7	12766.4
hsa-let-7b-5p	Endogenous1	286.3	27722.6	33047	2143.29	403.76	11442.7	117.62	728.31	340.25	9426.76	19187.8	5181.79
hsa-let-7c-5p	Endogenous1	28.83	3103.92	7531.65	1366.25	55.95	2228.24	6.99	51.44	52.97	3310.36	6156.62	2218.78
hsa-let-7d-5p	Endogenous1	11.31	1850.42	1870.88	168.91	17.73	772.96	2.65	15.82	29.03	792.86	1333.05	372.95
hsa-let-7e-5p	Endogenous1	3.22	1155.15	969.98	60.77	2.44	217.94	3.37	9.71	2.18	208.08	585.73	176.56
hsa-let-7f-5p	Endogenous1	3.22	703.89	810.63	103.13	1.27	183.21	1	1.02	2.18	262.81	647.79	184.51
hsa-let-7g-5p	Endogenous1	33.55	4076.63	5974.99	446.5	7.54	1063.32	1	4.62	2.18	1603.65	3986.19	1195.83
hsa-let-7i-5p	Endogenous1	7.94	5029.29	1490.91	581.4	8.82	1114.73	1	10.73	2.92	1527.64	2243.29	557.71
hsa-miR-1-3p	Endogenous1	1	58.75	3.7	35.13	1.27	9.55	4.82	9.71	20.33	54.03	207.33	32.17
hsa-miR-1-5p	Endogenous1	1	3.34	2.04	1.11	1.27	1	1	1.02	2.18	1.01	1	1
hsa-miR-100-5p	Endogenous1	1	911.13	2148.71	254.75	11.36	515.94	1	5.64	13.8	922.59	1632.16	510.61
hsa-miR-101-3p	Endogenous1	1	3.34	2.04	1.11	1.27	1	1	1.02	2.18	1.01	1	1
hsa-miR-103a-3p	Endogenous1	1	3.34	2.04	1.11	2.44	1	1	3.6	2.18	1.01	1	1
hsa-miR-105-5p	Endogenous1	1.2	25.33	30.26	20.63	1.27	6.77	4.1	1.02	13.8	14.5	10.8	1
hsa-miR-106a-5p+hsa-miR-17-5p	Endogenous1	2.55	245.94	205.95	19.52	1.27	68.59	1	1.02	2.18	91.53	148.71	40.73
hsa-miR-106b-5p	Endogenous1	1	185.77	185.52	12.83	1.27	72.76	1	1.57	2.18	60.11	78.89	24.21
hsa-miR-107	Endogenous1	7.26	282.71	324.43	25.09	12.64	147.09	6.99	8.69	20.33	107.74	179.74	49.91
hsa-miR-10a-5p	Endogenous1	1	2111.15	1975.06	34.01	1.27	1064.71	5.54	22.94	2.92	297.27	834.84	127
hsa-miR-10b-5p	Endogenous1	5.92	1399.16	935.25	116.51	22.83	358.26	5.54	14.8	9.45	409.76	689.17	256.09
hsa-miR-1178-3p	Endogenous1	1	3.34	2.04	1.68	1.27	1	1	1.02	2.18	1.01	1	1
hsa-miR-1180-3p	Endogenous1	6.59	382.99	207.99	21.75	4.99	113.05	3.37	8.69	31.21	69.23	131.47	19.32
hsa-miR-1183	Endogenous1	1	3.34	26.17	11.72	1.27	10.24	1	1.02	15.97	13.49	15.97	7.08
hsa-miR-1185-1-3p	Endogenous1	1	3.34	2.04	1.11	1.27	1	1	1.02	2.18	1.01	1	1
hsa-miR-1185-2-3p	Endogenous1	3.22	42.04	5.74	10.6	12.64	1.91	6.26	7.67	2.18	10.45	10.8	1
hsa-miR-1185-5p	Endogenous1	1	38.7	15.96	12.83	8.82	2.6	4.82	1.02	5.09	11.46	11.66	1
hsa-miR-1193	Endogenous1	1.2	8.61	2.04	1.11	1.27	6.08	1	1.02	2.18	4.37	1	5.86
hsa-miR-1197	Endogenous1	7.94	21.98	18	28.44	29.2	2.6	11.33	20.91	35.56	13.49	11.66	4.64
hsa-miR-1200	Endogenous1	1	8.61	2.04	12.83	12.64	1	1	1.02	2.18	1.01	1	1
hsa-miR-1202	Endogenous1	1	3.34	2.04	1.11	1.27	1	1	1.02	2.18	1.01	1	3.41
hsa-miR-1203	Endogenous1	1	11.96	2.04	19.52	2.44	1	1.93	2.59	2.18	1.01	1	2.8
hsa-miR-1204	Endogenous1	1.2	8.61	2.04	8.37	1.27	4.69	1	1.02	20.33	3.35	2.18	5.25
hsa-miR-1205	Endogenous1	1	8.61	2.04	1.11	1.27	1	1	1.02	2.18	1.01	1	1
hsa-miR-1206	Endogenous1	1	21.98	3.7	1.11	1.27	1	1	1.02	2.18	4.37	2.18	1
hsa-miR-122-5p	Endogenous1	1	3.34	2.04	1.11	1.27	15.8	1	1.02	2.18	1.01	1	1
hsa-miR-1224-3p	Endogenous1	1	18.64	2.04	1.68	1.27	1	1	1.02	2.18	1.01	1	1
hsa-miR-1224-5p	Endogenous1	1	3.34	2.04	1.11	6.27	1	1	1.02	2.92	1.01	1	1
hsa-miR-1226-3p	Endogenous1	1	8.61	2.04	1.11	1.27	1	1	1.02	2.18	1.01	2.18	1
hsa-miR-1228-3p	Endogenous1	1	21.98	2.04	6.14	1.27	1.21	1	1.02	5.09	1.01	1	2.8
hsa-miR-1233-3p	Endogenous1	1	8.61	5.74	1.11	1.27	3.3	1	1.02	2.92	3.35	27.18	4.02
hsa-miR-1234-3p	Endogenous1	1	25.33	5.74	8.37	3.72	3.99	1	3.6	9.45	8.42	7.35	5.86
hsa-miR-1236-3p	Endogenous1	3.89	38.7	2.04	9.49	8.82	6.77	6.99	2.59	7.27	13.49	7.35	5.86
hsa-miR-124-3p	Endogenous1	1	3.34	2.04	20.63	1.27	1	1.93	1.02	2.92	1.01	1	1
hsa-miR-1244	Endogenous1	1	25.33	2.04	13.95	10.09	10.94	1	1.57	20.33	7.41	9.94	1.58
hsa-miR-1245a	Endogenous1	3.22	3.34	2.04	1.68	1.27	1	1.2	1.02	2.18	2.34	1.32	1.58
hsa-miR-1245b-3p	Endogenous1	1	3.34	2.04	11.72	8.82	3.3	1	1.02	13.8	3.35	1	1
hsa-miR-1245b-5p	Endogenous1	1	3.34	2.04	2.8	1.27	1	1	1.02	5.09	1.33	1	1
hsa-miR-1246	Endogenous1	1	3.34	2.04	1.11	1.27	1	1	1.02	2.18	1.01	100.44	1
hsa-miR-1247-5p	Endogenous1	1	5.27	126.27	1.11	1.27	28.3	1	1.02	2.18	70.24	123.72	7.08
hsa-miR-1248	Endogenous1	3.22	3.34	2.04	5.03	1.27	3.99	1	5.64	15.97	4.37	1	1
hsa-miR-1249-3p	Endogenous1	1.2	3.34	2.04	1.11	12.64	3.99	4.1	1.57	2.18	1.01	3.04	3.41
hsa-miR-1249-5p	Endogenous1	1	5.27	2.04	1.11	1.27	1	1	1.02	2.18	1.01	1	1
hsa-miR-1250-5p	Endogenous1	1	3.34	2.04	1.11	1.27	1	1	1.02	2.18	1.01	1	1
hsa-miR-1252-5p	Endogenous1	1	5.27	2.04	1.11	1.27	1	1	1.02	2.18	4.37	1	1
hsa-miR-1253	Endogenous1	1	3.34	2.04	1.11	1.27	1	1	1.02	2.18	1.01	1	1
hsa-miR-1254	Endogenous1	1	3.34	2.04	1.11	1.27	1	1	1.02	2.18	1.01	1	1.58
hsa-miR-1255a	Endogenous1	1	5.27	5.74	13.95	17.73	1.91	9.16	14.8	7.27	15.52	10.8	11.37
hsa-miR-1255b-5p	Endogenous1	1.2	3.34	2.04	6.14	1.27	1	1	1.02	2.18	1.01	1	1
hsa-miR-1257	Endogenous1	6.59	21.98	15.96	7.26	7.54	1	1	5.64	2.18	8.42	1	1
hsa-miR-1258	Endogenous1	1	48.72	7.79	2.8	1.27	3.99	4.82	3.6	22.5	7.41	2.18	9.53
hsa-miR-125a-3p	Endogenous1	1	25.33	2.04	2.8	3.72	9.55	1	9.71	2.18	6.39	9.07	1
hsa-miR-125a-5p	Endogenous1	1.2	2789.71	2301.92	126.54	33.02	390.21	6.26	34.14	7.27	340.85	977.06	267.1
hsa-miR-125b-5p	Endogenous1	18.05	7415.96	29314.7	2465.48	360.45	7335.25	28.68	176.64	163.97	6540.35	14947.8	3776.46
hsa-miR-126-3p	Endogenous1	113.76	18761	12046.4	1073.04	24.1	2938.86	9.16	46.35	39.91	5015.05	8479.61	2551.61
hsa-miR-1260a	Endogenous1	1	543.44	254.97	12.83	43.21	217.94	1	16.84	5.09	172.61	162.5	32.78
hsa-miR-1260b	Endogenous1	1	48.72	2.04	2.8	1.27	1.21	1	1.02	11.62	1.01	6.49	8.31
hsa-miR-1261	Endogenous1	2.55	3.34	2.04	2.8	1.27	1	1.93	1.02	2.18	1.01	1.32	1
hsa-miR-1262	Endogenous1	1	5.27	2.04	3.91	3.72	1	2.65	5.64	2.92	1.01	6.49	4.02
hsa-miR-1264	Endogenous1	1	42.04	13.92	25.09	11.36	12.33	7.71	8.69	42.09	9.44	1	2.19
hsa-miR-1266-5p	Endogenous1	4.57	5.27	3.7	5.03	1.27	1	1	1.02	7.27	1.01	1	1
hsa-miR-1268a	Endogenous1	1	3.34	2.04	1.11	1.27	1	1	1.02	2.18	1.01	1	1
hsa-miR-1268b	Endogenous1	5.92	8.61	3.7	10.6	12.64	1	8.43	9.71	20.33	5.38	7.35	5.25
hsa-miR-1269a	Endogenous1	1	15.3	2.04	2.8	1.27	1	1	1.02	2.18	3.35	2.18	4.02
hsa-miR-1269b	Endogenous1	1	3.34	2.04	1.68	1.27	1	1	8.69	2.18	1.01	1	1
hsa-miR-127-3p	Endogenous1	4.57	613.63	491.95	103.13	16.46	374.93	3.37	13.78	18.15	475.64	954.65	210.82
hsa-miR-127-5p	Endogenous1	1.2	11.96	2.04	13.95	1.27	4.69	2.65	2.59	22.5	7.41	1	1.58
hsa-miR-1270	Endogenous1	6.59	8.61	2.04	18.4	10.09	6.77	1	5.64	2.18	5.38	1	3.41
hsa-miR-1271-3p	Endogenous1	1	3.34	2.04	1.11	1.27	1	1	1.02	2.18	1.01	1	1
hsa-miR-1271-5p	Endogenous1	2.55	35.35	2.04	7.26	1.27	1	1	1.02	2.18	1.01	1	1
hsa-miR-1272	Endogenous1	3.22	8.61	2.04	1.11	1.27	1	1.2	1.02	2.18	10.45	1	1
hsa-miR-1273c	Endogenous1	1	3.34	2.04	5.03	1.27	1	1	3.6	2.18	1.01	4.77	1
hsa-miR-1275	Endogenous1	1	3.34	2.04	1.11	1.27	1	1	1.02	2.18	1.01	1	1
hsa-miR-1276	Endogenous1	1.2	25.33	2.04	13.95	1.27	9.55	1.2	1.02	13.8	7.41	1	2.8
hsa-miR-1277-3p	Endogenous1	1	45.38	9.83	1.68	1.27	1.91	1	2.59	7.27	9.44	6.49	1
hsa-miR-1278	Endogenous1	1	3.34	2.04	1.11	1.27	1	1	1.02	2.18	1.01	1	1
hsa-miR-1279	Endogenous1	1	5.27	2.04	1.11	2.44	1	1	1.02	2.18	1.01	3.04	1
hsa-miR-128-1-5p	Endogenous1	1.87	45.38	18	11.72	1.27	26.92	1	1.57	11.62	12.48	5.63	8.92
hsa-miR-128-2-5p	Endogenous1	1	3.34	2.04	1.11	1.27	1	1	2.59	2.18	1.01	1	1
hsa-miR-128-3p	Endogenous1	1	3.34	2.04	1.11	1.27	1	1	1.02	2.18	1.01	1	1
hsa-miR-1281	Endogenous1	3.22	8.61	5.74	19.52	1.27	8.85	1	5.64	5.09	10.45	8.21	2.19
hsa-miR-1283	Endogenous1	1	3.34	2.04	1.11	1.27	1	1	1.02	2.18	1.01	1	1
hsa-miR-1285-3p	Endogenous1	1.87	52.07	38.43	19.52	4.99	3.99	6.26	9.71	22.5	11.46	3.9	1
hsa-miR-1285-5p	Endogenous1	5.24	235.91	67.03	7.26	11.36	72.07	9.88	4.62	9.45	27.68	23.73	4.64
hsa-miR-1286	Endogenous1	1	3.34	2.04	1.11	1.27	1	1	1.02	2.92	1.01	1	1
hsa-miR-1287-3p	Endogenous1	1	3.34	3.7	9.49	1.27	1	1	1.02	2.18	1.01	1.32	1
hsa-miR-1287-5p	Endogenous1	1.2	25.33	7.79	5.03	1.27	10.24	1	2.59	15.97	7.41	3.04	5.86
hsa-miR-1288-3p	Endogenous1	1	3.34	2.04	1.11	1.27	1	1	1.02	2.18	1.01	1	1
hsa-miR-1289	Endogenous1	2.55	3.34	2.04	1.11	3.72	1	1	1.02	2.18	1.01	1	1
hsa-miR-129-2-3p	Endogenous1	1	3.34	2.04	2.8	1.27	1	3.37	1.02	5.09	6.39	15.11	1
hsa-miR-129-5p	Endogenous1	1	28.67	2.04	1.11	3.72	1	1	5.64	2.92	4.37	1	1
hsa-miR-1290	Endogenous1	7.94	68.78	15.96	27.32	1.27	10.94	16.39	5.64	20.33	17.54	15.11	4.64
hsa-miR-1291	Endogenous1	1	3.34	2.04	8.37	1.27	1.21	1	4.62	5.09	3.35	1	1
hsa-miR-1293	Endogenous1	1	3.34	2.04	2.8	1.27	1	1	1.02	2.92	1.01	1	1
hsa-miR-1295a	Endogenous1	3.22	32.01	7.79	11.72	7.54	5.38	5.54	6.66	2.18	9.44	9.07	5.25
hsa-miR-1296-3p	Endogenous1	3.89	38.7	2.04	11.72	13.91	6.77	4.1	18.87	2.92	7.41	1	5.25
hsa-miR-1296-5p	Endogenous1	1	3.34	2.04	1.11	1.27	1	1	1.02	5.09	1.01	1	1
hsa-miR-1297	Endogenous1	2.55	32.01	2.04	21.75	1.27	2.6	1	11.75	11.62	5.38	1	1
hsa-miR-1298-5p	Endogenous1	8.61	8.61	2.04	9.49	1.27	3.99	1	6.66	2.18	13.49	4.77	3.41
hsa-miR-1299	Endogenous1	1	28.67	20.04	34.01	11.36	11.63	9.16	2.59	44.27	14.5	26.31	6.47
hsa-miR-1301-3p	Endogenous1	1	3.34	2.04	1.11	1.27	1	1	1.02	2.18	1.01	1	1
hsa-miR-1302	Endogenous1	3.89	3.34	2.04	12.83	1.27	1	1	3.6	2.18	5.38	1	2.19
hsa-miR-1303	Endogenous1	1	15.3	2.04	1.68	1.27	1	1	2.59	15.97	1.01	1.32	2.19
hsa-miR-1304-3p	Endogenous1	1	5.27	2.04	1.11	1.27	1	1	3.6	2.18	1.01	1	1
hsa-miR-1304-5p	Endogenous1	2.55	8.61	2.04	10.6	13.91	1	3.37	5.64	9.45	6.39	1	2.19
hsa-miR-1305	Endogenous1	1	8.61	2.04	8.37	6.27	1	1	8.69	2.18	1.01	1	3.41
hsa-miR-1306-3p	Endogenous1	1.2	42.04	2.04	11.72	12.64	4.69	5.54	10.73	15.97	19.57	3.9	1
hsa-miR-1306-5p	Endogenous1	1	3.34	7.79	3.91	1.27	8.16	2.65	3.6	7.27	1.01	3.9	6.47
hsa-miR-1307-3p	Endogenous1	2.55	72.12	26.17	17.29	1.27	18.58	8.43	1.57	29.03	20.58	9.07	5.86
hsa-miR-1307-5p	Endogenous1	1	15.3	28.22	19.52	4.99	3.99	5.54	6.66	11.62	7.41	8.21	5.25
hsa-miR-130a-3p	Endogenous1	18.05	6383.07	10420.3	360.66	22.83	2365.78	6.99	20.91	9.45	2689.1	5132.6	1285.16
hsa-miR-130b-3p	Endogenous1	1	3.34	2.04	1.11	1.27	1	1	1.02	2.18	1.01	1	1
hsa-miR-132-3p	Endogenous1	1	600.26	275.4	21.75	1.27	102.63	1	7.67	2.18	71.26	126.3	66.43
hsa-miR-1322	Endogenous1	1	3.34	2.04	8.37	1.27	1	1	1.57	7.27	3.35	2.18	2.19
hsa-miR-1323	Endogenous1	2.55	72.12	11.87	1.11	29.2	16.5	4.82	2.59	9.45	2.34	4.77	5.25
hsa-miR-133a-3p	Endogenous1	1	35.35	9.83	9.49	8.82	1	1	3.6	2.18	25.65	88.38	20.54
hsa-miR-133a-5p	Endogenous1	1.2	38.7	2.04	13.95	12.64	1	1.2	4.62	20.33	4.37	1	5.86
hsa-miR-133b	Endogenous1	1	3.34	2.04	1.11	1.27	1	1	1.02	2.18	1.01	1	1
hsa-miR-134-3p	Endogenous1	1	3.34	2.04	3.91	7.54	1.21	1.93	6.66	2.18	2.34	7.35	4.02
hsa-miR-134-5p+hsa-miR-6728-5p	Endogenous1	1	3.34	2.04	1.11	2.44	1.21	1	1.02	2.18	1.01	1	1
hsa-miR-135a-5p	Endogenous1	1	637.03	700.32	1.11	1.27	663.9	1	1.02	2.18	182.74	287.49	10.75
hsa-miR-135b-5p	Endogenous1	1.2	1706.69	929.12	28.44	2.44	1022.34	1	6.66	2.18	277	237.5	74.38
hsa-miR-136-5p	Endogenous1	1.87	496.64	1031.26	77.49	1.27	115.83	1	1.02	2.18	375.3	733.13	211.43
hsa-miR-137	Endogenous1	3.89	3.34	2.04	12.83	7.54	2.6	1	8.69	9.45	3.35	5.63	5.86
hsa-miR-138-5p	Endogenous1	5.92	18.64	5.74	16.18	1.27	1.91	2.65	8.69	15.97	7.41	7.35	4.02
hsa-miR-139-3p	Endogenous1	5.24	11.96	7.79	9.49	10.09	7.47	1	4.62	5.09	3.35	8.21	1
hsa-miR-139-5p	Endogenous1	1	3.34	2.04	1.11	1.27	1	1	1.02	2.18	1.01	1	1
hsa-miR-140-3p	Endogenous1	1	15.3	11.87	2.8	1.27	3.99	1	6.66	2.18	13.49	13.38	4.02
hsa-miR-140-5p	Endogenous1	3.89	854.31	775.9	67.46	1.27	111.66	1	2.59	18.15	253.69	526.25	119.66
hsa-miR-141-3p	Endogenous1	5.24	3952.96	3247.77	10.6	7.54	1990.67	4.1	13.78	11.62	423.95	693.48	79.28
hsa-miR-142-3p	Endogenous1	14.68	27151	6297.76	904.7	3.72	4380.93	1	17.85	2.92	7904.51	2989.75	765.73
hsa-miR-142-5p	Endogenous1	1	3.34	2.04	6.14	1.27	1	1	1.02	2.18	1.01	1	1
hsa-miR-143-3p	Endogenous1	1	6232.65	2234.51	1.11	1.27	470.1	1	1.02	2.18	1216.5	4541.29	747.38
hsa-miR-144-3p	Endogenous1	4.57	1175.2	5067.96	42.93	6.27	798.66	1	2.59	20.33	732.05	973.61	74.38
hsa-miR-145-5p	Endogenous1	6.59	5396.99	5827.9	534.58	41.94	597.91	6.99	36.17	70.38	1628.99	7650.4	1644.29
hsa-miR-1469	Endogenous1	1	8.61	2.04	7.26	1.27	2.6	1	1.02	7.27	1.01	1	1
hsa-miR-146a-5p	Endogenous1	5.24	834.25	179.39	65.23	19.01	228.36	4.1	6.66	7.27	322.6	146.99	43.79
hsa-miR-146b-3p	Endogenous1	1	3.34	2.04	1.11	1.27	1	1	1.02	2.18	1.01	1	1
hsa-miR-146b-5p	Endogenous1	1.87	179.09	87.46	17.29	6.27	87.35	1	11.75	9.45	53.01	36.66	10.14
hsa-miR-147a	Endogenous1	1	8.61	2.04	5.03	4.99	1	2.65	8.69	2.92	11.46	4.77	2.8
hsa-miR-147b	Endogenous1	1	48.72	3.7	11.72	1.27	5.38	4.82	14.8	5.09	2.34	8.21	2.19
hsa-miR-148a-3p	Endogenous1	9.96	3471.61	3466.35	115.4	1.27	1853.83	1	3.6	2.18	1493.18	2409.65	465.33
hsa-miR-148b-3p	Endogenous1	1	1907.25	2011.84	68.57	2.44	324.22	1	12.76	9.45	500.98	672.79	232.23
hsa-miR-149-5p	Endogenous1	3.22	65.44	81.33	18.4	21.56	58.87	8.43	5.64	13.8	25.65	51.31	18.71
hsa-miR-150-5p	Endogenous1	65.23	10033.3	4945.39	1793.23	151.51	2245.6	38.81	747.65	274.96	4756.61	3054.4	1241.11
hsa-miR-151a-3p	Endogenous1	1	413.07	158.96	22.86	1.27	74.85	1.2	1.02	24.68	79.37	97	21.77
hsa-miR-151a-5p	Endogenous1	1	128.95	205.95	19.52	1.27	50.53	1	1.02	2.92	64.16	123.72	31.56
hsa-miR-151b	Endogenous1	1	32.01	2.04	5.03	1.27	9.55	1	1.02	2.92	12.48	1	4.02
hsa-miR-152-3p	Endogenous1	1	189.12	114.02	17.29	3.72	37.33	1	1.02	20.33	67.2	87.51	19.32
hsa-miR-152-5p	Endogenous1	1	3.34	2.04	1.11	1.27	1	1	1.02	2.18	1.01	1	1
hsa-miR-153-3p	Endogenous1	1	3.34	2.04	5.03	1.27	1	5.54	1.02	9.45	10.45	1.32	1.58
hsa-miR-1537-3p	Endogenous1	1	75.47	2.04	2.8	1.27	3.3	1	1.02	2.18	5.38	6.49	1
hsa-miR-154-5p	Endogenous1	1	239.26	250.89	25.09	2.44	74.85	1	4.62	2.18	123.96	302.14	53.58
hsa-miR-155-5p	Endogenous1	3.22	175.75	89.5	16.18	6.27	90.13	1	1.02	2.18	134.09	41.83	17.48
hsa-miR-15a-5p	Endogenous1	9.96	3257.68	2563.41	128.77	1.27	829.92	1	3.6	2.18	951.98	1221	262.21
hsa-miR-15b-5p	Endogenous1	3.89	1165.17	1674.76	48.51	12.64	693.77	1	11.75	13.8	664.15	855.53	170.44
hsa-miR-16-5p	Endogenous1	9.96	1693.32	2044.52	142.15	17.73	1114.03	7.71	18.87	13.8	1013.8	837.42	179
hsa-miR-181a-2-3p	Endogenous1	1	15.3	7.79	5.03	10.09	6.77	6.99	9.71	2.18	1.01	1.32	1.58
hsa-miR-181a-3p	Endogenous1	5.24	38.7	7.79	26.21	11.36	13.02	12.05	19.89	24.68	21.6	19.42	6.47
hsa-miR-181a-5p	Endogenous1	27.49	7486.15	4160.93	329.45	15.19	1211.28	2.65	41.26	39.91	1810.4	2257.94	689.25
hsa-miR-181b-2-3p	Endogenous1	12.66	15.3	2.04	11.72	12.64	3.99	1.93	1.02	2.92	8.42	9.07	1
hsa-miR-181b-5p+hsa-miR-181d-5p	Endogenous1	1.2	125.61	118.1	12.83	1.27	29	1.93	1.02	2.18	47.95	78.03	15.04
hsa-miR-181c-5p	Endogenous1	1	179.09	167.13	10.6	1.27	58.17	1.2	1.02	2.92	40.85	92.69	24.21
hsa-miR-181d-3p	Endogenous1	1	5.27	2.04	10.6	10.09	1	2.65	8.69	2.18	7.41	2.18	4.02
hsa-miR-182-3p	Endogenous1	1	3.34	2.04	5.03	1.27	1	1	4.62	2.18	1.01	1	1
hsa-miR-182-5p	Endogenous1	1	11.96	3.7	1.11	1.27	8.85	1	1.02	2.18	1.01	1	1
hsa-miR-1827	Endogenous1	4.57	25.33	7.79	1.11	3.72	6.08	1	3.6	5.09	5.38	5.63	1
hsa-miR-183-5p	Endogenous1	7.94	78.81	95.63	16.18	7.54	28.3	5.54	17.85	2.18	16.53	25.45	2.8
hsa-miR-184	Endogenous1	6.59	18.64	3.7	10.6	8.82	6.08	3.37	2.59	11.62	1.01	1	1.58
hsa-miR-185-5p	Endogenous1	2.55	102.21	36.39	10.6	15.19	22.05	6.26	2.59	7.27	22.61	8.21	7.08
hsa-miR-186-5p	Endogenous1	2.55	85.49	44.56	23.98	8.82	19.97	6.26	11.75	11.62	24.64	37.52	14.43
hsa-miR-187-3p	Endogenous1	3.89	65.44	34.34	7.26	13.91	14.41	9.88	2.59	2.18	10.45	28.9	8.92
hsa-miR-188-3p	Endogenous1	1.2	3.34	3.7	5.03	1.27	1.21	1	1.02	2.18	1.01	1	1
hsa-miR-188-5p	Endogenous1	16.03	135.63	89.5	34.01	22.83	31.78	8.43	4.62	44.27	45.92	35.8	18.71
hsa-miR-18a-5p	Endogenous1	1.2	85.49	34.34	11.72	7.54	26.92	3.37	6.66	2.92	42.88	14.25	7.7
hsa-miR-18b-5p	Endogenous1	2.55	48.72	15.96	5.03	7.54	4.69	10.6	8.69	18.15	3.35	7.35	1
hsa-miR-1908-3p	Endogenous1	1	15.3	13.92	23.98	1.27	5.38	1	1.02	15.97	1.33	1.32	1
hsa-miR-1908-5p	Endogenous1	6.59	25.33	11.87	12.83	1.27	8.16	2.65	4.62	2.18	12.48	1	6.47
hsa-miR-1909-3p	Endogenous1	1.87	3.34	2.04	2.8	1.27	1	1	1.02	2.18	1.33	1	1
hsa-miR-190a-3p	Endogenous1	1	8.61	2.04	1.11	1.27	1	1	2.59	2.18	3.35	3.9	3.41
hsa-miR-190a-5p	Endogenous1	1	62.1	165.09	48.51	1.27	46.37	1	1.02	2.18	176.66	449.54	130.06
hsa-miR-190b	Endogenous1	1	3.34	2.04	1.11	1.27	1	1	1.02	2.18	1.01	1	1
hsa-miR-191-5p	Endogenous1	32.2	7379.19	5923.92	432.01	138.77	2666.56	14.94	201.07	100.85	2109.38	3317.3	979.25
hsa-miR-1910-3p	Endogenous1	1	3.34	2.04	10.6	1.27	1	1.93	1.02	13.8	1.01	1	1
hsa-miR-1910-5p	Endogenous1	1	3.34	54.77	8.37	1.27	15.11	1	1.57	2.18	12.48	23.73	5.25
hsa-miR-1915-3p	Endogenous1	1	8.61	5.74	1.11	1.27	1	1	1.02	2.18	1.01	1.32	1
hsa-miR-192-5p	Endogenous1	1	8.61	2.04	1.11	1.27	1	1	1.02	2.18	1.01	1	1
hsa-miR-193a-3p	Endogenous1	1	25.33	2.04	12.83	1.27	6.77	1	1.02	7.27	3.35	13.38	3.41
hsa-miR-193a-5p+hsa-miR-193b-5p	Endogenous1	1	68.78	5.74	23.98	1.27	10.24	1	1.02	2.18	17.54	12.52	4.64
hsa-miR-193b-3p	Endogenous1	1.2	85.49	26.17	16.18	1.27	44.98	1	1.57	15.97	28.69	58.21	8.92
hsa-miR-194-5p	Endogenous1	1	82.15	71.12	22.86	1.27	33.17	1.2	1.02	2.18	22.61	48.73	16.87
hsa-miR-195-5p	Endogenous1	2.55	122.26	299.92	60.77	1.27	138.06	1	6.66	5.09	356.05	490.91	127.61
hsa-miR-196a-3p	Endogenous1	2.55	3.34	2.04	1.11	1.27	1.91	1	5.64	2.18	1.01	1	1
hsa-miR-196a-5p	Endogenous1	10.63	85.49	58.86	51.85	16.46	26.92	6.26	9.71	31.21	123.96	53.04	17.48
hsa-miR-196b-5p	Endogenous1	1.87	513.35	741.17	23.98	1.27	122.78	1	1.02	2.18	228.35	479.71	100.08
hsa-miR-197-3p	Endogenous1	2.55	5.27	32.3	1.11	3.72	1.21	1	1.02	5.09	1.01	8.21	2.8
hsa-miR-197-5p	Endogenous1	7.94	11.96	22.09	13.95	11.36	1	6.99	1.02	2.92	4.37	3.9	2.8
hsa-miR-1972	Endogenous1	10.63	1599.72	387.76	23.98	43.21	291.57	1.93	28.03	29.03	52	47	15.65
hsa-miR-1973	Endogenous1	3.22	28.67	2.04	1.11	6.27	5.38	11.33	15.82	5.09	12.48	6.49	5.25
hsa-miR-1976	Endogenous1	1	3.34	5.74	5.03	2.44	1	2.65	7.67	2.18	1.33	1	1
hsa-miR-198	Endogenous1	1	35.35	30.26	16.18	6.27	1.91	2.65	3.6	15.97	9.44	1	1
hsa-miR-199a-3p+hsa-miR-199b-3p	Endogenous1	168.35	21398.3	42329.8	5946.02	62.32	9623.4	18.56	48.39	70.38	20181.9	36793.5	12110.6
hsa-miR-199a-5p	Endogenous1	5.24	1572.98	4203.83	178.94	16.46	527.75	6.99	10.73	11.62	1156.7	1731.28	345.42
hsa-miR-199b-5p	Endogenous1	34.9	3073.84	10585.7	1137.71	20.28	3824.53	6.99	31.09	29.03	5433.62	9087.3	2618.3
hsa-miR-19a-3p	Endogenous1	1	88.84	71.12	2.8	1.27	29	1	1.02	2.18	39.84	37.52	2.19
hsa-miR-19b-3p	Endogenous1	4.57	523.38	636.99	34.01	11.36	274.21	3.37	4.62	22.5	261.79	283.18	68.88
hsa-miR-200a-3p	Endogenous1	13.33	5824.85	3672.68	16.18	7.54	1555.13	1	26	18.15	529.35	764.16	86.62
hsa-miR-200b-3p	Endogenous1	18.72	19683.5	9972.87	23.98	64.87	6791.34	4.1	87.07	2.18	2799.57	2706.17	563.83
hsa-miR-200c-3p	Endogenous1	3.22	2769.65	2673.72	1.11	94.18	2231.02	1	83	11.62	504.02	654.69	108.03
hsa-miR-202-3p	Endogenous1	1	18.64	2.04	12.83	3.72	8.85	1	3.6	26.86	11.46	2.18	3.41
hsa-miR-203a-3p	Endogenous1	35.57	195.8	36.39	1.11	55.95	686.83	3.37	11.75	9.45	98.62	53.9	144.13
hsa-miR-203a-5p	Endogenous1	3.89	15.3	2.04	9.49	20.28	4.69	6.99	12.76	13.8	14.5	5.63	6.47
hsa-miR-204-5p	Endogenous1	1	3.34	156.92	7.26	1.27	7.47	1	1.02	2.18	7.41	22.87	24.83
hsa-miR-205-5p	Endogenous1	115.11	3347.93	1979.15	39.59	755.4	6305.09	38.08	537.97	111.73	2444.85	940	669.68
hsa-miR-2053	Endogenous1	5.92	52.07	5.74	20.63	17.73	10.94	13.5	7.67	29.03	23.62	8.21	8.31
hsa-miR-206	Endogenous1	1.2	15.3	2.04	5.03	1.27	1.21	1	1.02	5.09	8.42	1	1
hsa-miR-208a-3p	Endogenous1	5.24	68.78	22.09	13.95	6.27	4.69	1.2	12.76	2.18	4.37	20.28	7.08
hsa-miR-208b-3p	Endogenous1	1	3.34	20.04	26.21	15.19	3.99	10.6	13.78	18.15	7.41	9.94	4.02
hsa-miR-208b-5p	Endogenous1	1	3.34	2.04	5.03	1.27	3.3	1	1.02	11.62	1.01	2.18	1
hsa-miR-20a-5p+hsa-miR-20b-5p	Endogenous1	1.87	459.87	400.02	54.08	4.99	229.06	1	4.62	26.86	191.86	204.74	38.9
hsa-miR-21-5p	Endogenous1	20.75	21204.5	4767.66	465.46	4.99	2647.8	1	7.67	2.18	2812.74	2688.06	631.74
hsa-miR-210-3p	Endogenous1	1	15.3	2.04	1.11	2.44	6.77	1	1.02	2.18	1.33	7.35	5.25
hsa-miR-210-5p	Endogenous1	9.96	45.38	9.83	12.83	8.82	16.5	4.82	24.98	2.18	9.44	9.94	5.25
hsa-miR-211-3p	Endogenous1	1	3.34	2.04	1.11	1.27	1	1	1.02	2.18	1.01	1	1
hsa-miR-211-5p	Endogenous1	3.89	3.34	2.04	3.91	12.64	2.6	5.54	10.73	5.09	1.01	9.07	1.58
hsa-miR-2110	Endogenous1	1.87	11.96	2.04	1.11	16.46	4.69	6.99	10.73	22.5	1.33	7.35	4.02
hsa-miR-2113	Endogenous1	1.87	8.61	2.04	1.11	1.27	1	1	1.02	2.18	1.01	1	1
hsa-miR-2116-5p	Endogenous1	1	3.34	2.04	1.11	1.27	1	1	1.02	2.18	1.01	1	1
hsa-miR-2117	Endogenous1	3.89	35.35	2.04	25.09	1.27	6.08	1	1.02	7.27	10.45	1	1
hsa-miR-212-3p	Endogenous1	9.29	65.44	11.87	17.29	17.73	1	5.54	12.76	18.15	18.56	9.94	4.02
hsa-miR-214-3p	Endogenous1	1	42.04	73.16	1.11	1.27	19.97	1	1.02	2.18	13.49	53.04	11.98
hsa-miR-215-5p	Endogenous1	1	3.34	2.04	1.11	1.27	1	1	1.02	2.18	1.01	1	1
hsa-miR-216a-5p	Endogenous1	1	11.96	2.04	6.14	1.27	1	2.65	2.59	2.18	7.41	5.63	3.41
hsa-miR-216b-5p	Endogenous1	1.87	42.04	38.43	10.6	11.36	14.41	1	1.02	2.92	13.49	20.28	5.86
hsa-miR-217	Endogenous1	1.2	35.35	11.87	13.95	1.27	5.38	1	1.57	15.97	8.42	10.8	1
hsa-miR-218-5p	Endogenous1	5.92	306.11	1803.46	141.04	3.72	347.15	1	1.02	9.45	555.71	947.76	275.67
hsa-miR-219a-1-3p	Endogenous1	1	3.34	2.04	11.72	1.27	7.47	2.65	1.02	2.92	5.38	2.18	1
hsa-miR-219a-2-3p	Endogenous1	1	18.64	5.74	25.09	1.27	1	1	1.02	9.45	4.37	9.07	6.47
hsa-miR-219a-5p	Endogenous1	1	3.34	2.04	12.83	1.27	5.38	1	1.57	2.92	6.39	1.32	5.86
hsa-miR-219b-3p	Endogenous1	1.2	5.27	11.87	18.4	1.27	1	1	3.6	9.45	1.01	1	1
hsa-miR-22-3p	Endogenous1	1	964.61	297.87	16.18	1.27	148.48	1	1.02	2.18	133.08	251.29	56.03
hsa-miR-221-3p	Endogenous1	7.26	289.4	252.93	38.47	10.09	142.23	6.99	15.82	26.86	78.35	83.2	20.54
hsa-miR-221-5p	Endogenous1	1	3.34	24.13	3.91	1.27	9.55	1	1.02	2.18	12.48	14.25	3.41
hsa-miR-222-3p	Endogenous1	1	3772.45	3317.22	194.55	6.27	1162.66	1	19.89	5.09	1680.68	845.18	285.46
hsa-miR-223-3p	Endogenous1	42.99	37476.5	6207.88	843.39	20.28	2515.82	1	298.78	26.86	4605.6	2931.14	405.99
hsa-miR-224-5p	Endogenous1	1.2	18.64	5.74	22.86	1.27	1.21	3.37	1.02	2.92	10.45	1	5.86
hsa-miR-2278	Endogenous1	1	3.34	2.04	1.68	1.27	1	1	1.02	2.18	1.01	1	1
hsa-miR-23a-3p	Endogenous1	328.77	34187.3	35700.7	2620.44	336.24	10033.2	33.74	486.06	277.14	11070.6	20144.6	6277.55
hsa-miR-23b-3p	Endogenous1	22.77	5366.9	10763.5	176.71	45.76	1544.01	8.43	44.32	20.33	1543.86	3745.7	923.58
hsa-miR-23c	Endogenous1	1	3.34	3.7	1.11	1.27	3.99	4.1	9.71	2.92	9.44	4.77	1
hsa-miR-24-3p	Endogenous1	4.57	359.59	259.06	9.49	1.27	167.93	1	1.02	2.18	87.47	140.09	35.23
hsa-miR-25-3p	Endogenous1	1.87	1770.2	1705.41	244.72	4.99	1027.2	1	6.66	7.27	921.57	1063.26	257.93
hsa-miR-25-5p	Endogenous1	3.89	3.34	5.74	12.83	3.72	1.91	7.71	9.71	7.27	6.39	1	3.41
hsa-miR-2682-5p	Endogenous1	1	3.34	2.04	6.14	1.27	6.08	1	1.02	2.18	5.38	2.18	1
hsa-miR-26a-5p	Endogenous1	21.42	2014.21	3844.28	384.07	12.64	464.54	6.26	20.91	22.5	757.39	2224.33	637.86
hsa-miR-26b-5p	Endogenous1	16.7	2746.25	3689.03	312.72	11.36	719.47	3.37	9.71	18.15	968.19	2155.37	614
hsa-miR-27a-3p	Endogenous1	1	15.3	2.04	13.95	1.27	2.6	1	1.02	2.92	8.42	18.56	2.19
hsa-miR-27b-3p	Endogenous1	3.22	3234.28	4775.83	115.4	6.27	952.18	1	5.64	2.18	888.13	1979.53	368.05
hsa-miR-28-3p	Endogenous1	12.66	118.92	71.12	17.29	10.09	15.8	1.2	12.76	2.18	45.92	63.38	17.48
hsa-miR-28-5p	Endogenous1	18.72	1740.11	922.99	171.14	6.27	270.73	7.71	18.87	37.74	648.95	1135.66	336.24
hsa-miR-296-3p	Endogenous1	2.55	3.34	5.74	1.11	1.27	1	1	7.67	7.27	1.01	3.9	1
hsa-miR-296-5p	Endogenous1	1	95.52	83.37	17.29	4.99	49.14	1	1.02	2.92	40.85	109.92	32.17
hsa-miR-297	Endogenous1	1	3.34	2.04	1.11	1.27	1	1	1.02	2.18	1.01	1	1
hsa-miR-298	Endogenous1	1.2	3.34	2.04	5.03	4.99	5.38	1	7.67	2.18	8.42	1	1
hsa-miR-299-3p	Endogenous1	1	25.33	34.34	13.95	3.72	6.77	1	1.02	2.18	17.54	47.86	6.47
hsa-miR-299-5p	Endogenous1	3.89	169.06	367.33	23.98	11.36	44.98	14.94	6.66	13.8	96.59	202.16	50.52
hsa-miR-29a-3p	Endogenous1	9.29	2124.52	2820.81	330.56	10.09	848.68	1	7.67	15.97	742.19	1171	222.44
hsa-miR-29b-3p	Endogenous1	92.19	24079.1	26373	1220.2	8.82	4280.91	4.1	37.19	29.03	6561.63	12608.4	2793.28
hsa-miR-29c-3p	Endogenous1	3.22	1816.99	3750.31	194.55	11.36	595.13	4.1	1.57	11.62	818.2	1270.99	364.38
hsa-miR-300	Endogenous1	1	3.34	2.04	1.11	1.27	1	1.2	1.02	2.18	1.01	1	1
hsa-miR-301a-3p	Endogenous1	9.96	249.28	301.96	16.18	10.09	92.91	6.99	5.64	2.18	109.77	178.02	41.96
hsa-miR-301a-5p	Endogenous1	3.89	3.34	7.79	13.95	12.64	4.69	4.82	18.87	29.03	6.39	1	5.86
hsa-miR-301b-3p	Endogenous1	1	18.64	15.96	13.95	10.09	3.3	1	6.66	2.92	3.35	3.9	1.58
hsa-miR-301b-5p	Endogenous1	5.24	28.67	2.04	19.52	10.09	5.38	9.16	10.73	5.09	8.42	12.52	4.64
hsa-miR-302a-3p	Endogenous1	1	3.34	5.74	5.03	1.27	1	1	1.02	2.18	2.34	1	1
hsa-miR-302a-5p	Endogenous1	1	3.34	2.04	1.11	1.27	1	1	1.02	2.18	2.34	1	1
hsa-miR-302b-3p	Endogenous1	1	3.34	18	9.49	1.27	1	1	1.02	7.27	9.44	2.18	1
hsa-miR-302c-3p	Endogenous1	3.22	38.7	5.74	2.8	1.27	1	2.65	3.6	11.62	1.01	1.32	4.64
hsa-miR-302d-3p	Endogenous1	1	3.34	2.04	1.11	1.27	1	1	1.02	2.18	1.01	1	1
hsa-miR-302e	Endogenous1	1	3.34	2.04	1.11	1.27	1	1	1.02	5.09	1.01	1	1
hsa-miR-302f	Endogenous1	1	3.34	2.04	1.11	1.27	1.91	1	1.02	2.18	1.01	3.9	1
hsa-miR-3065-3p	Endogenous1	1.2	42.04	9.83	2.8	1.27	16.5	1	1.57	5.09	7.41	6.49	1
hsa-miR-3065-5p	Endogenous1	1	3.34	2.04	1.11	1.27	26.22	1	1.02	2.18	1.01	1	1
hsa-miR-3074-3p	Endogenous1	2.55	3.34	2.04	11.72	1.27	11.63	1	1.57	5.09	7.41	2.18	1
hsa-miR-30a-3p	Endogenous1	1	135.63	107.89	8.37	16.46	57.48	4.1	19.89	2.18	37.81	54.76	7.08
hsa-miR-30a-5p	Endogenous1	1	988.01	839.23	8.37	1.27	263.79	1	1.02	5.09	98.62	179.74	38.29
hsa-miR-30b-5p	Endogenous1	1	232.57	361.2	23.98	1.27	52.62	1	4.62	2.18	77.34	255.6	62.76
hsa-miR-30c-5p	Endogenous1	1	55.41	124.23	3.91	1.27	38.03	1	1.02	2.18	35.79	72.86	13.81
hsa-miR-30d-5p	Endogenous1	1.87	1155.15	1012.88	41.82	7.54	494.41	1	8.69	2.18	313.48	545.22	106.81
hsa-miR-30e-3p	Endogenous1	3.89	128.95	173.26	3.91	13.91	26.22	3.37	1.02	2.18	39.84	76.31	26.66
hsa-miR-30e-5p	Endogenous1	3.89	640.38	530.76	31.78	8.82	216.55	12.05	11.75	5.09	196.93	259.91	65.21
hsa-miR-31-5p	Endogenous1	1	112.24	64.99	1.11	1.27	55.4	1	1.02	11.62	13.49	1	5.25
hsa-miR-3127-5p	Endogenous1	1	3.34	2.04	1.11	1.27	1	1	1.57	2.18	1.01	1	1
hsa-miR-3130-3p	Endogenous1	1	3.34	2.04	5.03	1.27	1	1	1.02	2.18	1.01	1	1.58
hsa-miR-3131	Endogenous1	5.24	5.27	2.04	5.03	3.72	1.21	5.54	4.62	15.97	1.33	1	1
hsa-miR-3136-5p	Endogenous1	1	18.64	9.83	9.49	1.27	7.47	1	3.6	18.15	4.37	3.9	2.19
hsa-miR-3140-3p	Endogenous1	1	3.34	2.04	1.11	1.27	1	1	1.02	5.09	1.01	1	1
hsa-miR-3140-5p	Endogenous1	1	3.34	2.04	1.11	1.27	1	1	1.02	2.18	1.01	1	1
hsa-miR-3144-3p	Endogenous1	1	3.34	2.04	1.11	1.27	10.94	5.54	1.02	2.18	1.01	1	1
hsa-miR-3144-5p	Endogenous1	1	15.3	5.74	2.8	1.27	4.69	1	1.02	7.27	5.38	1	1
hsa-miR-3147	Endogenous1	5.24	18.64	2.04	20.63	1.27	3.99	4.1	16.84	2.92	14.5	3.9	5.86
hsa-miR-3150b-3p	Endogenous1	1	18.64	2.04	3.91	1.27	4.69	1	1.02	2.18	1.01	1	1
hsa-miR-3151-5p	Endogenous1	1	25.33	15.96	13.95	1.27	4.69	2.65	1.02	7.27	1.01	1.32	1
hsa-miR-3158-3p	Endogenous1	1	3.34	2.04	1.11	1.27	1	1	1.02	2.18	1.01	1	1
hsa-miR-3161	Endogenous1	1	21.98	15.96	16.18	1.27	10.24	1	1.02	26.86	9.44	8.21	2.19
hsa-miR-3164	Endogenous1	3.89	3.34	2.04	29.55	1.27	3.99	1.2	4.62	20.33	1.01	1	1
hsa-miR-3168	Endogenous1	1	28.67	5.74	12.83	11.36	1	8.43	3.6	2.92	1.01	5.63	4.02
hsa-miR-3179	Endogenous1	1	25.33	2.04	18.4	1.27	6.08	1	2.59	26.86	2.34	1	1
hsa-miR-3180	Endogenous1	5.92	3.34	2.04	9.49	1.27	1.91	1	10.73	5.09	5.38	2.18	1
hsa-miR-3180-3p	Endogenous1	1	3.34	2.04	1.11	1.27	1	1	1.02	2.18	1.01	1	1
hsa-miR-3180-5p	Endogenous1	1	3.34	2.04	1.11	1.27	1	1	1.02	2.92	1.01	1	1
hsa-miR-3182	Endogenous1	1	11.96	2.04	6.14	1.27	1	1	1.02	2.18	3.35	1	1
hsa-miR-3185	Endogenous1	1	3.34	2.04	1.11	1.27	1	1	1.02	2.92	1.01	1	1
hsa-miR-3190-3p	Endogenous1	1	3.34	2.04	1.11	1.27	1	1	1.02	2.18	1.01	1	1
hsa-miR-3192-5p	Endogenous1	1	3.34	2.04	1.11	1.27	1	1	1.02	9.45	3.35	1	1
hsa-miR-3195	Endogenous1	1	3.34	3.7	5.03	1.27	7.47	1	1.02	7.27	2.34	15.11	1
hsa-miR-3196	Endogenous1	1	18.64	2.04	5.03	3.72	2.6	1	1.02	5.09	2.34	1	2.19
hsa-miR-32-5p	Endogenous1	1	1222	1047.6	57.42	1.27	274.21	3.37	1.57	24.68	347.94	378.86	109.87
hsa-miR-3202	Endogenous1	1	3.34	2.04	15.06	1.27	3.99	1	1.02	9.45	1.01	1	1
hsa-miR-320a	Endogenous1	1	18.64	2.04	9.49	1.27	2.6	1	1.02	7.27	1.33	3.9	1.58
hsa-miR-320b	Endogenous1	1	3.34	2.04	3.91	1.27	1	1	1.02	5.09	3.35	1.32	1.58
hsa-miR-320c	Endogenous1	4.57	21.98	7.79	17.29	10.09	17.19	1	6.66	24.68	1.01	1	5.25
hsa-miR-320d	Endogenous1	1	3.34	2.04	3.91	1.27	3.3	1	1.02	2.18	1.01	2.18	1
hsa-miR-320e	Endogenous1	1.2	88.84	28.22	22.86	2.44	19.97	1	4.62	5.09	29.7	28.04	5.86
hsa-miR-323a-3p	Endogenous1	1.87	72.12	24.13	8.37	1.27	8.85	1.2	1.02	5.09	24.64	15.97	8.92
hsa-miR-323a-5p	Endogenous1	1	3.34	2.04	1.11	1.27	1	1	1.02	2.18	1.01	1	1
hsa-miR-323b-3p	Endogenous1	2.55	52.07	7.79	31.78	3.72	11.63	3.37	10.73	37.74	19.57	4.77	4.02
hsa-miR-323b-5p	Endogenous1	1	3.34	2.04	1.11	1.27	1	1	1.02	2.18	1.01	1	1
hsa-miR-324-3p	Endogenous1	7.94	35.35	13.92	11.72	3.72	1.21	5.54	7.67	13.8	9.44	10.8	3.41
hsa-miR-324-5p	Endogenous1	1	62.1	13.92	1.11	1.27	19.27	1	1.02	2.18	7.41	24.59	2.8
hsa-miR-325	Endogenous1	1	35.35	2.04	11.72	3.72	4.69	1	1.02	5.09	6.39	4.77	2.8
hsa-miR-326	Endogenous1	1.87	5.27	2.04	11.72	1.27	1.21	1	1.02	18.15	1.01	1	1
hsa-miR-328-3p	Endogenous1	3.22	3.34	2.04	3.91	1.27	5.38	1	1.02	7.27	5.38	3.9	1
hsa-miR-328-5p	Endogenous1	1	3.34	2.04	1.11	1.27	1	1	3.6	2.18	1.01	1	1
hsa-miR-329-3p	Endogenous1	1	11.96	2.04	11.72	4.99	5.38	3.37	1.02	5.09	1.01	3.9	1.58
hsa-miR-329-5p	Endogenous1	1.87	32.01	11.87	11.72	8.82	1.21	1.2	8.69	2.18	9.44	6.49	3.41
hsa-miR-330-3p	Endogenous1	1	3.34	2.04	12.83	1.27	1	1	1.02	5.09	1.01	1	1
hsa-miR-330-5p	Endogenous1	1	5.27	2.04	1.68	1.27	1	1	1.02	5.09	1.01	1	1
hsa-miR-331-3p	Endogenous1	1	125.61	48.64	1.11	1.27	26.92	1	1.57	2.92	13.49	14.25	7.7
hsa-miR-331-5p	Endogenous1	1	3.34	2.04	1.11	1.27	1	1	1.02	2.18	1.01	1	1
hsa-miR-335-5p	Endogenous1	3.89	18.64	54.77	10.6	10.09	8.16	1.2	4.62	2.18	30.72	78.89	27.89
hsa-miR-337-3p	Endogenous1	7.94	82.15	144.66	29.55	10.09	26.22	6.26	8.69	5.09	71.26	121.99	19.32
hsa-miR-337-5p	Endogenous1	6.59	155.69	128.32	16.18	15.19	42.2	7.71	14.8	2.18	94.57	159.06	44.4
hsa-miR-338-5p	Endogenous1	1	3.34	2.04	2.8	1.27	1	4.82	6.66	2.18	7.41	1	2.8
hsa-miR-339-3p	Endogenous1	1	15.3	2.04	1.11	1.27	1	1	1.02	2.18	1.01	1	1
hsa-miR-339-5p	Endogenous1	1	15.3	3.7	2.8	1.27	1	1	3.6	2.18	1.01	1	1
hsa-miR-33a-5p	Endogenous1	1	48.72	32.3	1.11	1.27	12.33	1	1.02	2.18	13.49	19.42	7.7
hsa-miR-33b-5p	Endogenous1	11.31	21.98	13.92	8.37	11.36	1.91	9.88	17.85	11.62	11.46	13.38	7.7
hsa-miR-340-5p	Endogenous1	1	473.24	310.13	38.47	10.09	63.73	1	5.64	2.18	156.39	242.67	63.98
hsa-miR-342-3p	Endogenous1	6.59	1168.52	1276.41	178.94	20.28	445.78	8.43	39.23	48.62	513.14	773.64	300.14
hsa-miR-342-5p	Endogenous1	1	58.75	2.04	10.6	1.27	3.3	1	3.6	2.18	3.35	9.94	2.8
hsa-miR-345-3p	Endogenous1	1	3.34	9.83	1.11	1.27	1	1	1.02	2.18	1.01	1	1
hsa-miR-345-5p	Endogenous1	1	35.35	7.79	16.18	1.27	7.47	1	1.02	2.92	10.45	15.97	1.58
hsa-miR-346	Endogenous1	1	52.07	2.04	12.83	1.27	1.21	1.93	20.91	26.86	6.39	1.32	4.02
hsa-miR-34a-5p	Endogenous1	6.59	1923.96	1351.99	55.19	15.19	667.38	9.16	2.59	20.33	359.09	421.09	88.45
hsa-miR-34b-3p	Endogenous1	4.57	5.27	9.83	9.49	1.27	1	1	7.67	2.18	10.45	1	2.8
hsa-miR-34c-3p	Endogenous1	1	32.01	69.07	2.8	1.27	12.33	1	1.02	2.18	3.35	9.94	4.64
hsa-miR-34c-5p	Endogenous1	4.57	112.24	1247.8	26.21	1.27	283.24	1	3.6	24.68	54.03	58.21	4.02
hsa-miR-3605-3p	Endogenous1	1	3.34	2.04	1.11	1.27	1	1	1.02	2.18	1.01	1	1
hsa-miR-3605-5p	Endogenous1	4.57	5.27	2.04	7.26	8.82	1.21	1.2	11.75	5.09	8.42	6.49	1.58
hsa-miR-361-3p	Endogenous1	1.87	306.11	226.37	9.49	1.27	97.77	1	1.02	2.18	81.39	115.1	46.85
hsa-miR-361-5p	Endogenous1	1	730.63	855.58	67.46	1.27	201.97	1	3.6	2.18	234.43	456.44	125.16
hsa-miR-3613-3p	Endogenous1	1	3.34	2.04	1.68	2.44	1	1	1.02	2.18	1.01	1	1
hsa-miR-3613-5p	Endogenous1	1	3.34	2.04	1.11	1.27	1	1	1.02	2.18	1.01	1	1
hsa-miR-3614-3p	Endogenous1	1	3.34	2.04	10.6	1.27	1	1	1.02	13.8	1.01	1	1
hsa-miR-3614-5p	Endogenous1	2.55	42.04	13.92	1.11	11.36	4.69	7.71	11.75	11.62	3.35	1.32	3.41
hsa-miR-3615	Endogenous1	1	11.96	9.83	2.8	7.54	1.21	1	8.69	20.33	8.42	1.32	2.19
hsa-miR-362-3p	Endogenous1	1	3.34	36.39	2.8	1.27	14.41	1	1.02	2.18	19.57	21.14	7.08
hsa-miR-362-5p	Endogenous1	1.2	115.58	36.39	10.6	8.82	38.72	3.37	10.73	9.45	46.93	55.62	19.93
hsa-miR-363-3p	Endogenous1	5.24	155.69	355.07	26.21	21.56	63.73	9.16	16.84	13.8	61.12	84.93	29.72
hsa-miR-363-5p	Endogenous1	1	3.34	2.04	11.72	4.99	8.16	1.93	1.57	33.38	7.41	1	2.19
hsa-miR-365a-3p+hsa-miR-365b-3p	Endogenous1	3.22	312.79	365.29	28.44	22.83	68.59	7.71	1.02	2.18	124.97	240.94	68.88
hsa-miR-365b-5p	Endogenous1	2.55	32.01	2.04	28.44	6.27	10.24	1	3.6	22.5	12.48	4.77	4.64
hsa-miR-367-3p	Endogenous1	1	3.34	3.7	19.52	1.27	4.69	1.2	3.6	7.27	4.37	3.04	3.41
hsa-miR-369-3p	Endogenous1	5.92	18.64	7.79	16.18	8.82	1.21	13.5	10.73	7.27	17.54	11.66	4.64
hsa-miR-369-5p	Endogenous1	1	3.34	2.04	2.8	1.27	1	1	1.02	2.18	1.01	1	1
hsa-miR-3690	Endogenous1	4.57	25.33	11.87	25.09	2.44	12.33	1.93	8.69	33.38	13.49	5.63	7.08
hsa-miR-370-3p	Endogenous1	4.57	25.33	36.39	28.44	8.82	7.47	3.37	12.76	11.62	13.49	15.11	4.64
hsa-miR-370-5p	Endogenous1	1.2	8.61	7.79	21.75	2.44	4.69	4.1	8.69	18.15	4.37	3.9	1
hsa-miR-371a-5p	Endogenous1	2.55	38.7	3.7	1.11	10.09	1	1	1.02	2.18	1.01	5.63	6.47
hsa-miR-371b-5p	Endogenous1	2.55	25.33	2.04	1.11	1.27	3.99	1	2.59	11.62	3.35	1	1
hsa-miR-372-3p	Endogenous1	1	3.34	2.04	1.11	1.27	1	1	1.02	2.18	1.01	1	1
hsa-miR-373-3p	Endogenous1	1	11.96	2.04	1.11	1.27	1	1	1.57	2.18	3.35	1	2.19
hsa-miR-374a-3p	Endogenous1	1	8.61	2.04	1.68	1.27	1	1	1.02	20.33	1.01	1	1
hsa-miR-374a-5p	Endogenous1	30.86	7583.09	6244.65	649.4	7.54	1134.87	2.65	17.85	24.68	2868.48	3682.77	1260.07
hsa-miR-374b-5p	Endogenous1	2.55	386.33	340.77	46.28	7.54	78.32	5.54	6.66	18.15	120.92	179.74	48.69
hsa-miR-374c-5p	Endogenous1	1	21.98	2.04	13.95	7.54	1.91	1	1.57	2.18	4.37	5.63	1
hsa-miR-375	Endogenous1	1	55.41	18	18.4	1.27	12.33	3.37	1.57	15.97	6.39	6.49	2.8
hsa-miR-376a-2-5p	Endogenous1	1	3.34	2.04	1.68	1.27	1.21	1	6.66	2.18	1.01	2.18	1
hsa-miR-376a-3p	Endogenous1	16.7	563.49	1155.88	100.9	20.28	251.28	14.22	19.89	42.09	669.22	945.17	226.72
hsa-miR-376b-3p	Endogenous1	1	3.34	2.04	1.11	1.27	1	1	1.02	2.18	1.01	1	1
hsa-miR-376c-3p	Endogenous1	1	155.69	393.89	21.75	1.27	71.37	1	1.02	9.45	147.27	312.49	66.43
hsa-miR-376c-5p	Endogenous1	1	3.34	2.04	1.11	1.27	1	1	1.02	2.18	1.01	1	1
hsa-miR-377-3p	Endogenous1	1	152.35	189.6	16.18	1.27	53.31	1	1.02	18.15	122.95	211.64	35.84
hsa-miR-378b	Endogenous1	1	11.96	2.04	1.11	1.27	3.99	1	1.02	2.18	1.01	1	1
hsa-miR-378c	Endogenous1	1	15.3	2.04	2.8	1.27	1	1	1.02	2.92	2.34	1	1
hsa-miR-378d	Endogenous1	1	11.96	30.26	20.63	6.27	8.85	9.16	12.76	2.18	29.7	28.9	5.86
hsa-miR-378e	Endogenous1	1	3.34	2.04	1.11	1.27	1	1	1.02	2.18	1.01	1	1
hsa-miR-378f	Endogenous1	1	8.61	11.87	10.6	3.72	1.91	7.71	5.64	18.15	1.01	8.21	2.19
hsa-miR-378g	Endogenous1	1.87	366.28	144.66	21.75	6.27	85.96	9.16	4.62	15.97	103.69	98.72	33.39
hsa-miR-378h	Endogenous1	3.89	21.98	2.04	17.29	1.27	2.6	1	4.62	2.18	6.39	4.77	1
hsa-miR-378i	Endogenous1	6.59	329.51	207.99	28.44	22.83	347.15	3.37	3.6	11.62	204.02	225.43	46.24
hsa-miR-379-5p	Endogenous1	1	239.26	248.85	25.09	1.27	72.07	1	3.6	9.45	163.49	245.25	52.97
hsa-miR-380-3p	Endogenous1	1	3.34	2.04	2.8	1.27	1	1	1.02	2.18	1.01	1	1
hsa-miR-381-3p	Endogenous1	1	38.7	52.73	1.11	2.44	10.94	1	4.62	2.18	31.73	70.27	11.37
hsa-miR-381-5p	Endogenous1	1	3.34	2.04	3.91	1.27	1	1	1.02	7.27	1.01	1	1
hsa-miR-382-3p	Endogenous1	1	3.34	2.04	1.68	4.99	1	2.65	1.02	9.45	1.33	1	4.02
hsa-miR-382-5p	Endogenous1	1	195.8	91.54	30.67	1.27	47.75	1	1.02	2.18	110.78	180.61	51.13
hsa-miR-383-5p	Endogenous1	1	5.27	2.04	1.11	1.27	3.99	1	1.02	2.18	1.01	1	1
hsa-miR-384	Endogenous1	1	3.34	2.04	8.37	1.27	4.69	1	1.57	2.18	1.01	1	1
hsa-miR-3916	Endogenous1	1	3.34	2.04	1.11	1.27	4.69	1	1.02	2.18	1.01	1	1
hsa-miR-3918	Endogenous1	1.2	21.98	2.04	16.18	1.27	5.38	1	1.02	2.18	1.01	2.18	1
hsa-miR-3928-3p	Endogenous1	1.2	45.38	13.92	9.49	3.72	8.85	1	1.02	11.62	5.38	9.94	3.41
hsa-miR-3934-5p	Endogenous1	1	3.34	2.04	9.49	1.27	1	1	1.57	9.45	1.01	1.32	2.19
hsa-miR-409-3p	Endogenous1	1	55.41	13.92	3.91	1.27	7.47	1	1.02	7.27	11.46	32.35	2.8
hsa-miR-409-5p	Endogenous1	1	3.34	2.04	1.11	1.27	1	1	1.02	2.18	1.01	1	1
hsa-miR-410-3p	Endogenous1	1	3.34	2.04	11.72	1.27	1	1	1.02	5.09	1.01	9.07	1
hsa-miR-411-5p	Endogenous1	1	132.29	150.79	7.26	1.27	29	1	1.02	2.18	70.24	102.17	27.89
hsa-miR-412-3p	Endogenous1	1.2	3.34	2.04	1.11	2.44	1	1	1.02	2.18	1.01	7.35	1
hsa-miR-421	Endogenous1	1.2	82.15	13.92	8.37	10.09	10.24	4.82	16.84	13.8	19.57	19.42	5.86
hsa-miR-422a	Endogenous1	1	3.34	2.04	1.11	1.27	1	1	1.02	2.18	1.01	1	1
hsa-miR-423-3p	Endogenous1	1	95.52	50.69	5.03	1.27	19.27	1	7.67	7.27	6.39	20.28	8.31
hsa-miR-423-5p	Endogenous1	1	192.46	226.37	10.6	11.36	37.33	1	7.67	2.18	30.72	72	13.81
hsa-miR-424-5p	Endogenous1	144.09	5169.69	20375.1	2319.44	10.09	4051.67	1	16.84	31.21	7615.66	19087.8	7956.36
hsa-miR-425-5p	Endogenous1	1	82.15	77.24	8.37	1.27	44.28	1	1.02	11.62	21.6	14.25	1.58
hsa-miR-4284	Endogenous1	1	8.61	2.04	2.8	3.72	1	6.26	4.62	2.18	1.01	1.32	1
hsa-miR-4286	Endogenous1	7.94	128.95	103.8	11.72	10.09	57.48	8.43	11.75	5.09	80.38	84.93	14.43
hsa-miR-429	Endogenous1	1	266	99.72	11.72	3.72	49.14	1	4.62	2.92	15.52	22.87	10.14
hsa-miR-431-5p	Endogenous1	1	25.33	7.79	8.37	1.27	3.3	1	1.02	15.97	1.01	1	1
hsa-miR-432-5p	Endogenous1	1	48.72	2.04	1.11	4.99	6.77	1	1.02	2.92	2.34	16.83	1
hsa-miR-433-3p	Endogenous1	1	3.34	2.04	1.11	1.27	3.3	1	1.02	2.18	3.35	6.49	1
hsa-miR-433-5p	Endogenous1	1	5.27	2.04	6.14	6.27	3.3	1	1.57	2.18	5.38	1	1
hsa-miR-4421	Endogenous1	1	15.3	3.7	6.14	1.27	1	1	1.57	5.09	6.39	1	1
hsa-miR-4425	Endogenous1	1	18.64	2.04	7.26	6.27	2.6	1	1.02	2.18	1.01	3.04	1.58
hsa-miR-4431	Endogenous1	1	3.34	2.04	1.11	3.72	1.21	1	1.02	2.18	1.01	1	1
hsa-miR-4435	Endogenous1	1	3.34	2.04	6.14	1.27	1	1	1.02	5.09	2.34	1	1
hsa-miR-4443	Endogenous1	3.22	169.06	93.59	9.49	15.19	19.27	3.37	1.02	2.18	24.64	34.07	7.08
hsa-miR-4448	Endogenous1	1	3.34	2.04	3.91	1.27	1	1	1.02	2.18	1.01	1	7.08
hsa-miR-4451	Endogenous1	1.87	3.34	2.04	10.6	1.27	1	2.65	1.02	2.18	1.01	1.32	1
hsa-miR-4454+hsa-miR-7975	Endogenous1	438.63	160998	50989.5	7185.72	3182.43	11446.1	260.8	1943.62	7929.15	21710.2	30134.8	10299.6
hsa-miR-4455	Endogenous1	1	21.98	2.04	1.11	1.27	1	1	1.02	2.18	3.35	1.32	1.58
hsa-miR-4458	Endogenous1	3.22	3.34	2.04	19.52	1.27	3.3	1	3.6	2.18	6.39	1	1.58
hsa-miR-4461	Endogenous1	2.55	3.34	2.04	7.26	1.27	1.91	1	1.57	2.18	1.01	1	2.19
hsa-miR-448	Endogenous1	1	5.27	2.04	3.91	1.27	1.91	7.71	8.69	2.92	3.35	9.94	2.8
hsa-miR-4485-3p	Endogenous1	1	3.34	2.04	3.91	4.99	1	1	1.02	2.18	1.01	2.18	5.86
hsa-miR-4488	Endogenous1	1	58.75	26.17	23.98	6.27	7.47	3.37	6.66	11.62	8.42	14.25	1
hsa-miR-449a	Endogenous1	1	18.64	2.04	1.11	1.27	8.85	1	1.02	2.18	4.37	1	1
hsa-miR-449b-5p	Endogenous1	5.92	11.96	2.04	1.68	16.46	2.6	1.2	1.02	9.45	6.39	10.8	3.41
hsa-miR-449c-5p	Endogenous1	1	3.34	2.04	8.37	1.27	3.3	1	4.62	7.27	5.38	1	1
hsa-miR-450a-1-3p	Endogenous1	1	8.61	2.04	15.06	1.27	9.55	1	1.02	18.15	11.46	10.8	1.58
hsa-miR-450a-2-3p	Endogenous1	1.87	3.34	18	8.37	8.82	6.08	6.99	5.64	11.62	15.52	6.49	1
hsa-miR-450a-5p	Endogenous1	10.63	2539.01	3270.24	126.54	1.27	329.78	1	1.02	2.18	726.98	2508.78	549.76
hsa-miR-450b-3p	Endogenous1	1	11.96	7.79	12.83	1.27	1	1	3.6	2.18	11.46	1.32	1.58
hsa-miR-450b-5p	Endogenous1	1.2	132.29	134.44	13.95	1.27	13.02	1	2.59	2.18	32.75	53.04	18.71
hsa-miR-4516	Endogenous1	1	95.52	26.17	1.11	8.82	1.91	1	5.64	2.18	10.45	6.49	2.8
hsa-miR-451a	Endogenous1	430.54	14746.4	110835	2394.13	137.49	12323.5	4.1	154.24	144.38	11164.9	24913	4580.38
hsa-miR-452-5p	Endogenous1	1	3.34	2.04	1.68	1.27	1	1	1.02	2.18	1.01	1	1
hsa-miR-4521	Endogenous1	1	42.04	7.79	17.29	1.27	12.33	1	2.59	29.03	10.45	3.9	4.02
hsa-miR-4524a-5p	Endogenous1	1	3.34	2.04	1.11	1.27	1	1	1.02	2.18	1.01	1	1
hsa-miR-4531	Endogenous1	3.22	15.3	2.04	1.11	1.27	4.69	1	1.02	2.18	1.01	1	3.41
hsa-miR-4532	Endogenous1	1	3.34	11.87	1.11	1.27	1	1.2	5.64	2.18	1.01	2.18	1.58
hsa-miR-4536-3p	Endogenous1	1	3.34	2.04	9.49	13.91	1.91	1	1.57	2.18	2.34	1.32	3.41
hsa-miR-4536-5p	Endogenous1	1	25.33	20.04	10.6	10.09	1.21	1	1.02	7.27	1.01	2.18	3.41
hsa-miR-454-3p	Endogenous1	1	122.26	99.72	5.03	1.27	19.97	4.82	1.02	2.18	36.8	45.28	13.2
hsa-miR-455-3p	Endogenous1	1	3.34	2.04	1.11	1.27	1.21	1	1.02	2.18	1.01	28.04	1
hsa-miR-455-5p	Endogenous1	1	667.12	1601.22	36.24	1.27	235.31	4.82	8.69	20.33	338.82	1214.97	292.19
hsa-miR-4647	Endogenous1	3.89	15.3	2.04	15.06	13.91	1	1	6.66	9.45	1.33	3.04	3.41
hsa-miR-4707-3p	Endogenous1	1	3.34	2.04	13.95	1.27	1	1.93	1.02	5.09	6.39	1	1
hsa-miR-4707-5p	Endogenous1	7.94	3.34	7.79	16.18	11.36	8.85	3.37	1.02	29.03	11.46	3.04	10.14
hsa-miR-4741	Endogenous1	1	11.96	2.04	7.26	1.27	1	1	1.02	9.45	2.34	3.9	1
hsa-miR-4755-5p	Endogenous1	2.55	5.27	2.04	16.18	3.72	3.99	1	1.02	2.18	5.38	3.04	1.58
hsa-miR-4787-3p	Endogenous1	1	3.34	2.04	8.37	1.27	1	1.93	1.57	2.92	1.01	1	1
hsa-miR-4787-5p	Endogenous1	2.55	38.7	28.22	10.6	6.27	3.3	5.54	2.59	13.8	2.34	6.49	2.8
hsa-miR-4792	Endogenous1	1	3.34	2.04	2.8	1.27	1	1	6.66	2.18	2.34	1	1
hsa-miR-483-3p	Endogenous1	3.22	32.01	18	1.68	1.27	1	1	1.57	11.62	1.01	5.63	1.58
hsa-miR-483-5p	Endogenous1	1	3.34	2.04	1.11	1.27	1	1	1.02	2.18	1.01	1	1
hsa-miR-484	Endogenous1	1	35.35	3.7	18.4	1.27	3.3	1	3.6	2.18	2.34	4.77	1.58
hsa-miR-485-3p	Endogenous1	1	3.34	32.3	8.37	1.27	6.77	1	6.66	20.33	10.45	15.11	3.41
hsa-miR-485-5p	Endogenous1	1	3.34	2.04	2.8	1.27	1	1	3.6	2.92	5.38	1	1
hsa-miR-486-3p	Endogenous1	1	3.34	2.04	1.11	1.27	5.38	1	1.02	2.92	1.01	3.04	1
hsa-miR-487a-3p	Endogenous1	1	3.34	13.92	3.91	1.27	1.91	1	11.75	5.09	7.41	22.87	4.02
hsa-miR-487b-3p	Endogenous1	1	3.34	2.04	1.11	1.27	1	1	1.02	2.18	1.01	10.8	1
hsa-miR-487b-5p	Endogenous1	3.89	3.34	7.79	6.14	8.82	1	1.2	1.57	2.18	3.35	1	1.58
hsa-miR-488-3p	Endogenous1	1	65.44	2.04	12.83	1.27	1	1	2.59	2.18	1.01	3.04	1
hsa-miR-489-3p	Endogenous1	1	5.27	26.17	1.11	1.27	1	1	1.02	2.18	1.01	5.63	2.19
hsa-miR-490-3p	Endogenous1	1	3.34	3.7	1.11	1.27	1	1	1.02	2.18	1.01	1.32	1
hsa-miR-490-5p	Endogenous1	1	3.34	2.04	10.6	1.27	4.69	2.65	6.66	15.97	3.35	1	1.58
hsa-miR-491-3p	Endogenous1	1	8.61	2.04	18.4	10.09	1	1	4.62	13.8	7.41	1	8.31
hsa-miR-491-5p	Endogenous1	4.57	102.21	87.46	20.63	6.27	23.44	1	3.6	46.44	11.46	26.31	10.75
hsa-miR-492	Endogenous1	1.2	5.27	2.04	15.06	1.27	3.99	1	1.57	11.62	1.33	1.32	1
hsa-miR-493-3p	Endogenous1	1	78.81	38.43	16.18	16.46	19.27	1.93	4.62	33.38	28.69	9.94	14.43
hsa-miR-494-3p	Endogenous1	1	3.34	2.04	1.11	1.27	1	1	1.02	2.18	1.01	1	1
hsa-miR-494-5p	Endogenous1	1	3.34	2.04	1.11	1.27	1	1	1.02	2.18	1.01	1	1
hsa-miR-495-3p	Endogenous1	7.94	596.92	400.02	102.02	24.1	154.73	4.82	7.67	15.97	397.6	715.03	182.67
hsa-miR-495-5p	Endogenous1	1	5.27	2.04	8.37	3.72	3.3	1.2	7.67	5.09	3.35	13.38	4.02
hsa-miR-496	Endogenous1	1	3.34	2.04	1.11	1.27	1	1	1.02	2.18	1.01	1	1
hsa-miR-497-5p	Endogenous1	7.94	162.38	308.09	119.86	16.46	411.05	6.26	15.82	22.5	404.7	475.4	109.87
hsa-miR-498	Endogenous1	1	3.34	2.04	1.11	1.27	1	1	1.02	2.18	1.01	1	1
hsa-miR-499a-3p	Endogenous1	1	25.33	3.7	3.91	7.54	8.16	3.37	8.69	15.97	2.34	8.21	5.86
hsa-miR-499a-5p	Endogenous1	1	42.04	15.96	31.78	2.44	6.08	1.93	6.66	35.56	10.45	16.83	4.64
hsa-miR-499b-3p	Endogenous1	1	3.34	2.04	5.03	1.27	1	1.2	1.02	2.18	1.01	1	1
hsa-miR-499b-5p	Endogenous1	1	3.34	9.83	1.11	4.99	2.6	1.93	1.02	2.18	1.01	1	2.19
hsa-miR-5001-3p	Endogenous1	1	3.34	2.04	1.11	1.27	1	1	1.02	2.18	1.01	1	1
hsa-miR-5001-5p	Endogenous1	1.2	3.34	2.04	1.11	1.27	1.21	1.93	1.02	2.18	7.41	3.04	1.58
hsa-miR-500a-5p+hsa-miR-501-5p	Endogenous1	1	115.58	38.43	13.95	1.27	20.66	1	1.02	5.09	35.79	37.52	12.59
hsa-miR-501-3p	Endogenous1	1	3.34	2.04	1.11	1.27	1	1	1.02	2.18	1.01	1	1
hsa-miR-5010-3p	Endogenous1	2.55	8.61	7.79	9.49	1.27	1.91	4.82	1.02	20.33	7.41	1.32	4.02
hsa-miR-5010-5p	Endogenous1	1	18.64	2.04	15.06	1.27	1.91	4.1	7.67	24.68	1.01	1	1
hsa-miR-502-3p	Endogenous1	1	21.98	2.04	11.72	1.27	1	1	11.75	20.33	12.48	1	1.58
hsa-miR-502-5p	Endogenous1	1	3.34	2.04	1.11	1.27	1	1	1.02	2.18	1.01	1	1
hsa-miR-503-3p	Endogenous1	1.2	8.61	7.79	1.11	1.27	1	1	1.02	2.92	3.35	1	1
hsa-miR-503-5p	Endogenous1	4.57	824.22	616.56	35.13	13.91	96.38	1	6.66	2.92	154.36	310.76	118.43
hsa-miR-504-3p	Endogenous1	1	3.34	2.04	7.26	2.44	1.21	1	4.62	13.8	1.33	1	1
hsa-miR-504-5p	Endogenous1	2.55	28.67	42.52	22.86	1.27	10.94	5.54	1.57	5.09	15.52	13.38	5.86
hsa-miR-505-3p	Endogenous1	1	192.46	120.14	28.44	1.27	29	1	1.02	15.97	46.93	65.96	21.77
hsa-miR-506-3p	Endogenous1	3.89	65.44	81.33	34.01	13.91	19.27	9.88	4.62	18.15	17.54	22	7.08
hsa-miR-506-5p	Endogenous1	1	8.61	2.04	1.11	7.54	1	1	1.57	9.45	8.42	2.18	2.8
hsa-miR-507	Endogenous1	1	3.34	7.79	1.68	1.27	1	1	6.66	11.62	1.01	1	1
hsa-miR-508-3p	Endogenous1	1	3.34	2.04	1.11	1.27	1	1	1.02	2.18	1.01	1	1
hsa-miR-508-5p	Endogenous1	1	5.27	2.04	1.11	1.27	1	1	1.57	2.18	1.01	1	1
hsa-miR-509-3-5p	Endogenous1	1	3.34	2.04	1.11	1.27	1	1	5.64	2.18	1.33	1	1
hsa-miR-509-3p	Endogenous1	1	3.34	9.83	1.11	1.27	1	1	1.02	2.18	1.01	1	1
hsa-miR-509-5p	Endogenous1	4.57	38.7	5.74	32.9	8.82	10.94	12.05	8.69	18.15	16.53	3.04	1
hsa-miR-510-3p	Endogenous1	6.59	3.34	2.04	18.4	1.27	1.21	4.82	11.75	2.18	10.45	1	1
hsa-miR-510-5p	Endogenous1	1	3.34	2.04	2.8	1.27	1.21	1	1.02	2.18	1.01	1	1
hsa-miR-511-5p	Endogenous1	1	15.3	2.04	5.03	1.27	1.91	1.2	1.02	5.09	3.35	1	1
hsa-miR-512-3p	Endogenous1	1	3.34	2.04	1.11	1.27	1	1	1.02	2.18	1.01	1	1
hsa-miR-512-5p	Endogenous1	5.24	48.72	2.04	1.68	2.44	1.21	5.54	2.59	13.8	4.37	5.63	2.8
hsa-miR-513a-3p	Endogenous1	1	11.96	2.04	2.8	1.27	1	3.37	1.02	2.18	1.01	1	2.19
hsa-miR-513a-5p	Endogenous1	1	11.96	2.04	1.11	1.27	1.21	1	1.02	2.18	1.01	1	1
hsa-miR-513b-5p	Endogenous1	1	3.34	40.47	9.49	12.64	1.21	1	6.66	13.8	6.39	16.83	4.64
hsa-miR-513c-3p	Endogenous1	1	3.34	2.04	1.11	1.27	1	1	1.02	2.18	1.01	1	1
hsa-miR-513c-5p	Endogenous1	1	3.34	2.04	13.95	8.82	1	1	4.62	5.09	1.01	1	4.02
hsa-miR-514a-3p	Endogenous1	11.98	62.1	26.17	19.52	40.67	3.99	12.05	10.73	24.68	16.53	9.94	10.14
hsa-miR-514a-5p	Endogenous1	1.87	28.67	56.82	21.75	6.27	13.72	1	1.02	15.97	10.45	21.14	2.8
hsa-miR-514b-3p	Endogenous1	2.55	3.34	2.04	1.68	1.27	1.91	1	1.57	18.15	1.01	1	1
hsa-miR-514b-5p	Endogenous1	1.2	15.3	46.6	7.26	12.64	10.24	6.99	13.78	15.97	20.58	40.97	12.59
hsa-miR-515-3p	Endogenous1	1	18.64	2.04	6.14	1.27	1	1	1.02	2.18	1.01	1	7.08
hsa-miR-515-5p	Endogenous1	1	15.3	2.04	35.13	1.27	13.72	3.37	1.02	18.15	11.46	6.49	5.25
hsa-miR-516a-3p+hsa-miR-516b-3p	Endogenous1	1	28.67	2.04	1.11	1.27	3.3	1.2	9.71	2.18	4.37	1	1
hsa-miR-516a-5p	Endogenous1	1	11.96	2.04	5.03	1.27	2.6	1	1.57	2.18	1.01	1	1
hsa-miR-516b-5p	Endogenous1	7.94	32.01	2.04	31.78	3.72	15.8	2.65	9.71	22.5	1.33	3.9	7.7
hsa-miR-517a-3p	Endogenous1	1	32.01	15.96	17.29	1.27	1.91	1.93	1.02	11.62	3.35	3.9	4.64
hsa-miR-517b-3p	Endogenous1	1	3.34	2.04	2.8	6.27	1	1	1.02	2.18	1.01	1	1
hsa-miR-517c-3p+hsa-miR-519a-3p	Endogenous1	2.55	21.98	5.74	10.6	16.46	7.47	8.43	9.71	20.33	7.41	5.63	1
hsa-miR-518b	Endogenous1	1.87	142.32	95.63	37.36	1.27	44.28	1	3.6	7.27	52	100.44	21.16
hsa-miR-518c-3p	Endogenous1	1	3.34	2.04	10.6	1.27	4.69	1	1.02	9.45	3.35	1	1
hsa-miR-518d-3p	Endogenous1	4.57	18.64	2.04	8.37	4.99	8.85	1	1.57	13.8	1.01	1	4.02
hsa-miR-518e-3p	Endogenous1	1	8.61	2.04	1.11	3.72	1	1	1.02	2.92	1.01	1	1
hsa-miR-518f-3p	Endogenous1	1.2	62.1	22.09	3.91	13.91	3.99	1	1.57	22.5	12.48	1	6.47
hsa-miR-5196-3p+hsa-miR-6732-3p	Endogenous1	1.2	75.47	44.56	3.91	2.44	7.47	1	1.02	2.18	28.69	20.28	1.58
hsa-miR-5196-5p	Endogenous1	1	3.34	2.04	9.49	6.27	1.21	1	2.59	2.18	8.42	1	1.58
hsa-miR-519b-3p	Endogenous1	4.57	18.64	15.96	38.47	12.64	13.02	2.65	11.75	35.56	7.41	3.9	4.64
hsa-miR-519b-5p+hsa-miR-519c-5p+hsa-miR-523-5p+hsa-miR-518e-5p+hsa-miR-522-5p+hsa-miR-519a-5p	Endogenous1	1	11.96	2.04	8.37	1.27	1	1	1.02	5.09	1.01	1	1
hsa-miR-519c-3p	Endogenous1	1	3.34	2.04	1.11	1.27	3.3	4.82	5.64	2.18	2.34	1	2.19
hsa-miR-519d-3p	Endogenous1	1	5.27	2.04	1.11	1.27	1	1.93	1.02	2.18	1.01	1	1
hsa-miR-519e-3p	Endogenous1	3.22	8.61	2.04	16.18	1.27	5.38	3.37	3.6	37.74	7.41	7.35	4.64
hsa-miR-520a-3p	Endogenous1	1	3.34	2.04	1.11	1.27	1	1	1.02	11.62	1.01	1	1
hsa-miR-520a-5p	Endogenous1	1	28.67	9.83	6.14	6.27	2.6	4.1	2.59	5.09	7.41	7.35	4.02
hsa-miR-520b	Endogenous1	1	3.34	2.04	2.8	1.27	1	1	1.02	2.18	1.01	1	1
hsa-miR-520c-3p	Endogenous1	1	38.7	5.74	1.68	1.27	7.47	1	1.02	9.45	1.01	1.32	2.8
hsa-miR-520d-3p	Endogenous1	1	35.35	2.04	5.03	1.27	3.3	1	1.02	2.18	2.34	6.49	1
hsa-miR-520d-5p+hsa-miR-527+hsa-miR-518a-5p	Endogenous1	1	15.3	2.04	3.91	1.27	1.91	1	1.02	2.92	14.5	1	1
hsa-miR-520e	Endogenous1	1	5.27	2.04	1.11	1.27	1	1	1.02	2.18	1.33	1	1
hsa-miR-520f-3p	Endogenous1	1	3.34	2.04	9.49	1.27	1	1	1.02	2.18	1.01	1	1
hsa-miR-520g-3p	Endogenous1	3.89	3.34	2.04	1.68	1.27	1	1	1.02	13.8	1.33	1	1
hsa-miR-520h	Endogenous1	1	11.96	2.04	5.03	2.44	1.91	1.2	1.02	20.33	4.37	7.35	1
hsa-miR-521	Endogenous1	1	5.27	2.04	2.8	1.27	1	1	3.6	2.18	1.01	1	1
hsa-miR-522-3p	Endogenous1	1.2	68.78	22.09	9.49	11.36	1.91	1	1.02	5.09	1.01	1.32	1.58
hsa-miR-523-3p	Endogenous1	1	5.27	2.04	10.6	1.27	1.21	1	1.02	20.33	1.01	1	2.19
hsa-miR-524-3p	Endogenous1	3.22	3.34	2.04	18.4	1.27	1.91	1.93	2.59	18.15	1.33	3.9	1.58
hsa-miR-525-3p	Endogenous1	1.87	25.33	2.04	25.09	1.27	1	4.82	1.57	35.56	4.37	10.8	7.7
hsa-miR-525-5p	Endogenous1	4.57	15.3	9.83	26.21	17.73	1.21	4.82	4.62	22.5	9.44	8.21	7.08
hsa-miR-526a+hsa-miR-518c-5p+hsa-miR-518d-5p	Endogenous1	9.96	58.75	30.26	36.24	8.82	16.5	11.33	13.78	48.62	24.64	17.69	6.47
hsa-miR-526b-5p	Endogenous1	1	52.07	2.04	16.18	11.36	1.91	1.93	1.02	5.09	5.38	1	1
hsa-miR-532-3p	Endogenous1	5.92	3.34	3.7	23.98	21.56	3.3	6.99	13.78	5.09	11.46	7.35	6.47
hsa-miR-532-5p	Endogenous1	2.55	45.38	5.74	25.09	2.44	24.83	1	10.73	18.15	21.6	25.45	7.08
hsa-miR-539-3p	Endogenous1	1	3.34	2.04	5.03	1.27	1	1	1.02	2.18	1.01	3.9	1
hsa-miR-539-5p	Endogenous1	1	125.61	26.17	26.21	6.27	17.88	1	6.66	33.38	13.49	13.38	1
hsa-miR-541-3p	Endogenous1	1	3.34	2.04	1.11	1.27	1	1	1.02	2.18	1.01	1	1
hsa-miR-542-3p	Endogenous1	1	82.15	50.69	17.29	11.36	11.63	7.71	3.6	7.27	14.5	34.93	5.86
hsa-miR-542-5p	Endogenous1	1.87	5.27	13.92	5.03	1.27	3.3	1	1.02	2.18	11.46	15.11	7.08
hsa-miR-543	Endogenous1	9.29	282.71	142.62	26.21	12.64	61.65	5.54	13.78	20.33	122.95	284.04	41.96
hsa-miR-544a	Endogenous1	1	3.34	2.04	7.26	1.27	1.21	1	1.02	2.92	3.35	1	1
hsa-miR-545-3p	Endogenous1	1	25.33	13.92	17.29	1.27	11.63	1	1.02	13.8	20.58	18.56	2.8
hsa-miR-548a-3p	Endogenous1	1	3.34	2.04	1.11	1.27	1	1	1.02	2.18	1.01	1	1
hsa-miR-548a-5p	Endogenous1	1.87	11.96	13.92	7.26	20.28	1.21	2.65	9.71	18.15	9.44	5.63	5.86
hsa-miR-548aa+hsa-miR-548t-3p	Endogenous1	1	3.34	2.04	1.11	1.27	1	1	1.02	2.18	1.01	1	1
hsa-miR-548ad-3p	Endogenous1	1	3.34	2.04	3.91	2.44	2.6	1.2	1.02	2.92	1.01	1	1
hsa-miR-548ah-5p	Endogenous1	7.26	42.04	5.74	5.03	7.54	13.02	4.82	6.66	5.09	4.37	9.07	5.86
hsa-miR-548ai+hsa-miR-570-5p	Endogenous1	1	3.34	2.04	1.11	1.27	1	1	1.02	2.18	1.33	1	1
hsa-miR-548ak	Endogenous1	1	8.61	2.04	6.14	4.99	1	1	7.67	2.18	1.01	1	1
hsa-miR-548al	Endogenous1	1	21.98	11.87	12.83	4.99	10.94	1.2	7.67	22.5	7.41	8.21	5.25
hsa-miR-548ar-3p	Endogenous1	6.59	8.61	7.79	13.95	12.64	1	4.82	10.73	2.18	6.39	1	1.58
hsa-miR-548ar-5p	Endogenous1	1	3.34	2.04	1.11	1.27	1.91	1	1.02	2.18	1.01	1	1
hsa-miR-548b-3p	Endogenous1	1	3.34	2.04	1.11	1.27	1	1	1.02	2.18	1.01	1	1
hsa-miR-548c-5p+hsa-miR-548o-5p+hsa-miR-548am-5p	Endogenous1	1	3.34	2.04	1.11	1.27	1	1	1.02	2.18	1.01	1	1
hsa-miR-548d-3p	Endogenous1	1	3.34	2.04	1.11	1.27	1	1	1.02	2.18	1.01	1	1
hsa-miR-548d-5p	Endogenous1	1.2	48.72	24.13	11.72	8.82	4.69	1.93	7.67	13.8	12.48	29.76	7.08
hsa-miR-548e-3p	Endogenous1	1	3.34	2.04	2.8	1.27	1	1	1.02	2.18	1.01	1	1
hsa-miR-548e-5p	Endogenous1	17.38	55.41	28.22	30.67	35.57	8.85	19.28	17.85	33.38	14.5	15.97	4.02
hsa-miR-548g-3p	Endogenous1	1	3.34	11.87	10.6	21.56	5.38	9.88	8.69	7.27	7.41	1	1.58
hsa-miR-548h-5p	Endogenous1	1	3.34	2.04	1.11	1.27	1	1	1.02	2.18	1.01	1	1
hsa-miR-548i	Endogenous1	1	5.27	2.04	1.11	1.27	1.91	1	1.02	2.18	1.01	1	2.8
hsa-miR-548j-3p	Endogenous1	5.24	35.35	2.04	16.18	13.91	14.41	4.82	7.67	33.38	17.54	5.63	1
hsa-miR-548j-5p	Endogenous1	1	11.96	2.04	5.03	1.27	1.91	1	1.02	2.92	1.01	1	1
hsa-miR-548k	Endogenous1	3.22	72.12	9.83	9.49	15.19	9.55	1.93	14.8	13.8	2.34	13.38	3.41
hsa-miR-548l	Endogenous1	1	8.61	2.04	8.37	1.27	3.3	1	3.6	2.18	2.34	1.32	1
hsa-miR-548m	Endogenous1	3.89	78.81	50.69	28.44	8.82	13.02	5.54	15.82	9.45	19.57	20.28	7.08
hsa-miR-548n	Endogenous1	1	3.34	2.04	11.72	6.27	13.02	1	7.67	20.33	18.56	10.8	3.41
hsa-miR-548o-3p+hsa-miR-548ah-3p+hsa-miR-548av-3p	Endogenous1	5.24	8.61	2.04	25.09	7.54	13.72	1.93	2.59	24.68	5.38	10.8	1
hsa-miR-548q	Endogenous1	1	3.34	2.04	1.11	1.27	1	1	1.02	2.18	1.01	1	1
hsa-miR-548v	Endogenous1	1	3.34	2.04	6.14	3.72	1.91	1.2	1.02	7.27	3.35	1.32	1.58
hsa-miR-548y	Endogenous1	4.57	48.72	2.04	19.52	20.28	3.3	6.99	10.73	7.27	5.38	13.38	5.86
hsa-miR-548z+hsa-miR-548h-3p	Endogenous1	1	45.38	9.83	15.06	4.99	31.08	1	6.66	7.27	2.34	1	1
hsa-miR-549a	Endogenous1	1	3.34	2.04	3.91	1.27	1	1	1.02	2.18	1.01	1	1
hsa-miR-550a-5p	Endogenous1	1	3.34	2.04	1.11	1.27	1	1	1.02	2.18	1.01	1	1
hsa-miR-551a	Endogenous1	5.24	38.7	2.04	31.78	10.09	1	1	1.02	2.18	5.38	1	4.64
hsa-miR-551b-3p	Endogenous1	5.24	75.47	18	18.4	20.28	15.8	1.93	3.6	20.33	25.65	8.21	1.58
hsa-miR-552-3p	Endogenous1	11.31	18.64	3.7	1.68	4.99	1.91	2.65	5.64	7.27	2.34	1	2.8
hsa-miR-553	Endogenous1	1	3.34	2.04	6.14	2.44	3.99	1	1.02	11.62	1.01	1	1
hsa-miR-554	Endogenous1	1	3.34	2.04	1.11	1.27	1	1	1.02	2.18	1.01	1	1
hsa-miR-555	Endogenous1	1	21.98	2.04	9.49	1.27	1	1	1.02	2.18	1.01	1	1
hsa-miR-556-3p	Endogenous1	1	3.34	2.04	16.18	1.27	1	5.54	2.59	20.33	4.37	1	1
hsa-miR-556-5p	Endogenous1	1	3.34	2.04	1.11	1.27	1	1	1.02	2.18	1.01	1	1
hsa-miR-561-3p	Endogenous1	1.2	15.3	2.04	13.95	1.27	1	1	1.02	18.15	1.33	1	3.41
hsa-miR-561-5p	Endogenous1	1	5.27	3.7	16.18	10.09	1	1.2	1.02	2.18	7.41	3.9	1
hsa-miR-562	Endogenous1	1	5.27	2.04	3.91	1.27	1	1	1.02	13.8	1.01	1	1
hsa-miR-563	Endogenous1	5.24	25.33	9.83	15.06	8.82	1	9.88	12.76	7.27	10.45	7.35	2.19
hsa-miR-564	Endogenous1	2.55	15.3	3.7	6.14	2.44	2.6	1	6.66	2.18	10.45	7.35	1
hsa-miR-566	Endogenous1	4.57	8.61	2.04	10.6	11.36	1	1	1.57	5.09	2.34	5.63	1
hsa-miR-567	Endogenous1	1	3.34	2.04	11.72	1.27	11.63	2.65	5.64	18.15	7.41	1	1
hsa-miR-568	Endogenous1	2.55	11.96	2.04	25.09	1.27	6.77	1	2.59	15.97	5.38	1	1
hsa-miR-570-3p	Endogenous1	1	3.34	2.04	1.11	1.27	1	1	1.02	2.18	1.01	1	1
hsa-miR-571	Endogenous1	1	3.34	2.04	1.11	1.27	1	1	1.02	2.18	1.01	1	1
hsa-miR-572	Endogenous1	1	3.34	2.04	8.37	1.27	1	1	4.62	2.18	7.41	3.04	2.19
hsa-miR-573	Endogenous1	1	3.34	2.04	6.14	1.27	1	1	1.02	2.18	1.01	1	1
hsa-miR-574-3p	Endogenous1	1.87	155.69	224.33	11.72	8.82	49.14	4.1	7.67	2.18	87.47	192.67	48.08
hsa-miR-574-5p	Endogenous1	1.2	229.23	118.1	9.49	8.82	88.04	1	6.66	13.8	81.39	83.2	28.5
hsa-miR-575	Endogenous1	3.22	42.04	13.92	22.86	13.91	22.75	3.37	16.84	13.8	13.49	9.94	6.47
hsa-miR-576-3p	Endogenous1	1	5.27	2.04	1.11	1.27	1.91	1	1.02	5.09	1.01	1	1
hsa-miR-576-5p	Endogenous1	2.55	5.27	7.79	15.06	1.27	8.85	1	5.64	9.45	7.41	1	4.02
hsa-miR-577	Endogenous1	1.2	45.38	18	5.03	1.27	4.69	1	1.57	2.18	4.37	19.42	1
hsa-miR-578	Endogenous1	4.57	11.96	2.04	16.18	1.27	8.16	1	1.02	20.33	5.38	5.63	4.02
hsa-miR-579-3p	Endogenous1	1	3.34	2.04	1.11	1.27	1	1	1.02	2.18	1.01	1	1
hsa-miR-579-5p	Endogenous1	1	3.34	2.04	1.68	3.72	1	1	7.67	2.92	8.42	3.04	2.8
hsa-miR-580-3p	Endogenous1	1	3.34	2.04	12.83	1.27	4.69	1	1.02	5.09	1.01	1	1.58
hsa-miR-582-3p	Endogenous1	4.57	8.61	15.96	1.11	10.09	1	2.65	1.02	2.18	10.45	4.77	1
hsa-miR-582-5p	Endogenous1	4.57	169.06	69.07	12.83	22.83	29.69	17.83	16.84	11.62	21.6	40.11	7.7
hsa-miR-584-3p	Endogenous1	11.31	21.98	13.92	29.55	19.01	6.77	6.26	19.89	22.5	29.7	9.94	8.31
hsa-miR-584-5p	Endogenous1	6.59	3.34	2.04	12.83	7.54	1	2.65	5.64	7.27	1.33	3.9	2.19
hsa-miR-585-3p	Endogenous1	2.55	5.27	9.83	9.49	4.99	1.91	8.43	6.66	9.45	8.42	15.97	1
hsa-miR-587	Endogenous1	1	3.34	3.7	9.49	1.27	1	1	1.02	2.18	6.39	4.77	3.41
hsa-miR-589-5p	Endogenous1	1	5.27	2.04	1.11	1.27	1	1	4.62	2.18	8.42	1.32	2.8
hsa-miR-590-3p	Endogenous1	1	11.96	2.04	1.11	1.27	1	1	1.02	2.18	1.01	1	1
hsa-miR-590-5p	Endogenous1	1.87	55.41	62.94	1.68	1.27	13.02	1	1.02	2.92	27.68	28.9	1
hsa-miR-591	Endogenous1	1.87	8.61	2.04	7.26	1.27	1	1	4.62	7.27	4.37	6.49	1
hsa-miR-592	Endogenous1	1	38.7	26.17	8.37	4.99	8.16	1	4.62	2.18	9.44	14.25	4.64
hsa-miR-593-3p	Endogenous1	11.98	58.75	24.13	17.29	4.99	6.08	1.2	6.66	2.18	21.6	16.83	6.47
hsa-miR-595	Endogenous1	1	11.96	2.04	8.37	7.54	1	1	1.02	29.03	1.33	1	1
hsa-miR-596	Endogenous1	4.57	8.61	7.79	28.44	1.27	8.85	1	1.02	35.56	14.5	1	2.19
hsa-miR-597-5p	Endogenous1	1.2	35.35	32.3	9.49	1.27	3.99	4.1	11.75	13.8	1.01	2.18	3.41
hsa-miR-598-3p	Endogenous1	1	42.04	40.47	10.6	3.72	20.66	9.88	2.59	9.45	20.58	25.45	15.04
hsa-miR-599	Endogenous1	1	3.34	2.04	1.11	1.27	1	1	1.02	2.18	1.01	1	1
hsa-miR-600	Endogenous1	1	3.34	2.04	1.11	4.99	1	1.2	1.02	2.18	1.01	1	1
hsa-miR-601	Endogenous1	1	3.34	2.04	6.14	1.27	1	1	1.02	2.18	1.01	1	1
hsa-miR-603	Endogenous1	1	3.34	2.04	1.11	1.27	1	1	1.02	2.18	1.01	1	1
hsa-miR-604	Endogenous1	1	3.34	2.04	1.11	1.27	1	1	1.02	2.18	1.01	1	1
hsa-miR-605-5p	Endogenous1	1	5.27	2.04	6.14	1.27	1	1	3.6	2.92	1.01	1	2.19
hsa-miR-606	Endogenous1	1	3.34	2.04	10.6	1.27	3.3	1	2.59	5.09	1.01	1	1.58
hsa-miR-607	Endogenous1	6.59	32.01	24.13	17.29	22.83	4.69	4.82	13.78	15.97	10.45	14.25	4.64
hsa-miR-608	Endogenous1	1	42.04	3.7	28.44	10.09	15.8	4.1	14.8	26.86	25.65	13.38	8.31
hsa-miR-610	Endogenous1	3.22	18.64	2.04	6.14	1.27	6.08	1	1.02	20.33	4.37	6.49	1
hsa-miR-612	Endogenous1	21.42	128.95	40.47	38.47	30.47	29.69	30.13	23.96	46.44	39.84	17.69	13.2
hsa-miR-613	Endogenous1	1	3.34	2.04	2.8	1.27	1	1.93	1.02	18.15	4.37	1	1
hsa-miR-614	Endogenous1	1	5.27	2.04	1.68	4.99	1	1	1.02	2.92	1.01	1	1
hsa-miR-615-3p	Endogenous1	1.87	3.34	2.04	5.03	1.27	1	1	8.69	2.18	1.01	1	1
hsa-miR-615-5p	Endogenous1	1	3.34	2.04	18.4	1.27	1	1	2.59	7.27	13.49	1	1
hsa-miR-616-3p	Endogenous1	1	3.34	11.87	1.68	1.27	1.21	1	1.02	2.18	1.33	1	1
hsa-miR-617	Endogenous1	1	3.34	5.74	7.26	1.27	3.3	1	1.02	2.18	6.39	1	1
hsa-miR-619-3p	Endogenous1	1	3.34	2.04	2.8	1.27	1.91	1	1.02	13.8	1.33	4.77	1
hsa-miR-620	Endogenous1	1	3.34	2.04	1.11	1.27	1	3.37	1.02	2.18	1.01	1	1
hsa-miR-624-3p	Endogenous1	1	11.96	2.04	1.68	1.27	1	1	1.57	2.92	1.01	1	2.8
hsa-miR-625-5p	Endogenous1	1	8.61	2.04	6.14	1.27	6.77	1	1.02	7.27	5.38	7.35	1
hsa-miR-626	Endogenous1	5.24	11.96	2.04	12.83	15.19	3.3	1	1.02	7.27	8.42	5.63	6.47
hsa-miR-627-3p	Endogenous1	5.92	21.98	3.7	21.75	10.09	5.38	7.71	20.91	18.15	12.48	11.66	5.25
hsa-miR-627-5p	Endogenous1	1	3.34	2.04	1.11	1.27	1	1	1.02	2.18	1.01	1	1
hsa-miR-628-3p	Endogenous1	1	11.96	7.79	7.26	1.27	5.38	1	1.02	7.27	3.35	3.04	1
hsa-miR-628-5p	Endogenous1	1.87	95.52	36.39	1.11	1.27	19.27	1	3.6	2.18	20.58	29.76	9.53
hsa-miR-629-5p	Endogenous1	1	35.35	11.87	13.95	12.64	6.08	1.93	9.71	18.15	5.38	1	1
hsa-miR-630	Endogenous1	1	18.64	2.04	2.8	1.27	2.6	1.2	4.62	2.18	1.01	1	1
hsa-miR-631	Endogenous1	1	3.34	2.04	5.03	1.27	2.6	1	1.02	11.62	1.01	1	1
hsa-miR-637	Endogenous1	1	3.34	2.04	1.11	1.27	1	1	1.02	2.18	1.01	1	1
hsa-miR-638	Endogenous1	1	3.34	2.04	7.26	1.27	1.21	1	1.02	2.18	1.01	1	1
hsa-miR-639	Endogenous1	5.92	21.98	3.7	2.8	1.27	3.3	1	5.64	13.8	2.34	1	1
hsa-miR-640	Endogenous1	1	3.34	11.87	1.11	4.99	7.47	1.2	5.64	2.18	10.45	4.77	1.58
hsa-miR-641	Endogenous1	1	3.34	2.04	1.11	1.27	1	1	1.02	2.18	1.01	1	1
hsa-miR-642a-3p	Endogenous1	1	15.3	2.04	1.11	1.27	1	1	1.02	2.18	1.01	1	1
hsa-miR-642a-5p	Endogenous1	1	112.24	28.22	5.03	3.72	47.75	6.26	10.73	2.18	23.62	24.59	6.47
hsa-miR-643	Endogenous1	1	3.34	2.04	1.11	1.27	1	1.2	1.02	2.18	1.01	1	1
hsa-miR-644a	Endogenous1	1	5.27	2.04	1.11	1.27	8.85	2.65	1.02	11.62	7.41	1	2.19
hsa-miR-648	Endogenous1	2.55	3.34	2.04	12.83	1.27	1	1	1.02	5.09	1.01	1	1
hsa-miR-649	Endogenous1	1	3.34	2.04	13.95	2.44	1	1	1.02	15.97	3.35	1	1
hsa-miR-650	Endogenous1	1	25.33	2.04	9.49	8.82	1.21	1	7.67	5.09	4.37	4.77	1
hsa-miR-6503-3p	Endogenous1	1.2	3.34	2.04	9.49	2.44	3.3	1.2	6.66	2.92	4.37	6.49	1
hsa-miR-6503-5p	Endogenous1	1.2	15.3	3.7	25.09	15.19	6.77	5.54	6.66	7.27	12.48	7.35	1
hsa-miR-651-3p	Endogenous1	1	3.34	2.04	1.11	1.27	1	1	1.57	2.18	1.01	1	1
hsa-miR-651-5p	Endogenous1	1	11.96	18	7.26	1.27	8.16	6.26	8.69	2.92	12.48	8.21	8.31
hsa-miR-6511a-3p	Endogenous1	1	3.34	2.04	1.11	1.27	1	1	2.59	2.18	5.38	1.32	3.41
hsa-miR-6511a-5p	Endogenous1	1	3.34	2.04	2.8	1.27	1	1	1.02	2.18	1.01	1	1
hsa-miR-652-3p	Endogenous1	1	8.61	2.04	1.11	1.27	1.91	1	1.02	2.18	1.01	1	1
hsa-miR-652-5p	Endogenous1	1	3.34	2.04	1.11	1.27	1	1	1.02	2.18	1.01	1	1
hsa-miR-654-3p	Endogenous1	1	5.27	2.04	2.8	1.27	8.16	1.2	1.02	15.97	1.33	6.49	1
hsa-miR-654-5p	Endogenous1	1	5.27	2.04	2.8	1.27	1	1	1.02	2.18	1.01	5.63	1
hsa-miR-655-3p	Endogenous1	1	18.64	2.04	8.37	1.27	1	1.2	2.59	2.18	1.01	1	1.58
hsa-miR-656-3p	Endogenous1	1.87	35.35	22.09	23.98	1.27	6.77	5.54	1.02	2.92	13.49	29.76	8.92
hsa-miR-660-3p	Endogenous1	1.87	38.7	2.04	16.18	3.72	4.69	1.93	5.64	2.18	13.49	3.04	4.64
hsa-miR-660-5p	Endogenous1	1	169.06	124.23	7.26	1.27	45.67	1	1.02	5.09	70.24	59.07	19.93
hsa-miR-661	Endogenous1	1	11.96	5.74	10.6	1.27	1	4.82	3.6	11.62	11.46	1	1
hsa-miR-663a	Endogenous1	1	3.34	2.04	1.11	1.27	1	5.54	1.57	2.18	1.01	1	1
hsa-miR-664a-3p	Endogenous1	3.89	132.29	287.66	31.78	11.36	48.45	9.88	8.69	11.62	38.83	85.79	29.72
hsa-miR-664b-3p	Endogenous1	1	21.98	5.74	1.68	1.27	19.97	1	5.64	2.18	3.35	1	1
hsa-miR-664b-5p	Endogenous1	1	3.34	2.04	1.11	1.27	1	1	1.02	2.18	1.01	1	1
hsa-miR-665	Endogenous1	1.2	3.34	2.04	7.26	1.27	1	1	5.64	11.62	2.34	4.77	1
hsa-miR-671-3p	Endogenous1	1	5.27	2.04	1.11	1.27	3.99	1	1.02	2.92	1.33	1	1
hsa-miR-671-5p	Endogenous1	1	11.96	2.04	6.14	4.99	1	4.82	9.71	20.33	6.39	2.18	1
hsa-miR-6720-3p	Endogenous1	1	3.34	2.04	5.03	1.27	1.91	1	1.02	5.09	1.01	1	1
hsa-miR-6721-5p	Endogenous1	3.89	42.04	24.13	21.75	19.01	3.99	1.93	10.73	20.33	10.45	14.25	4.64
hsa-miR-6724-5p	Endogenous1	3.22	52.07	20.04	21.75	3.72	4.69	4.1	10.73	9.45	11.46	3.04	4.02
hsa-miR-675-5p	Endogenous1	1	5.27	2.04	1.11	1.27	1	1	1.02	2.18	1.01	1	1
hsa-miR-7-5p	Endogenous1	1	72.12	13.92	8.37	1.27	32.47	1	1.02	2.18	63.15	16.83	4.64
hsa-miR-708-5p	Endogenous1	1	3.34	2.04	1.11	1.27	1	1	1.02	2.18	1.01	1	1
hsa-miR-744-5p	Endogenous1	1	3.34	2.04	7.26	1.27	1	1	1.02	24.68	4.37	1	1
hsa-miR-758-3p+hsa-miR-411-3p	Endogenous1	1	28.67	7.79	5.03	2.44	2.6	1	1.02	2.18	2.34	15.11	2.19
hsa-miR-758-5p	Endogenous1	1.2	18.64	2.04	5.03	1.27	1	1	1.02	2.92	1.01	1	1
hsa-miR-760	Endogenous1	1	3.34	7.79	9.49	4.99	1	1	4.62	2.18	1.01	1	1
hsa-miR-761	Endogenous1	1	11.96	7.79	1.11	1.27	1	1	3.6	5.09	4.37	1	1
hsa-miR-764	Endogenous1	4.57	5.27	24.13	18.4	13.91	5.38	4.82	19.89	15.97	1.33	1	5.86
hsa-miR-765	Endogenous1	1	5.27	2.04	10.6	1.27	1	1	3.6	22.5	8.42	4.77	2.8
hsa-miR-766-3p	Endogenous1	1	3.34	2.04	1.11	1.27	1	1	1.02	2.18	1.01	1	1
hsa-miR-766-5p	Endogenous1	1	3.34	2.04	1.11	1.27	1	1	1.02	2.18	1.01	1	1
hsa-miR-767-3p	Endogenous1	1	3.34	2.04	13.95	1.27	1	1	1.02	2.92	2.34	1	1.58
hsa-miR-767-5p	Endogenous1	2.55	11.96	2.04	2.8	6.27	1	2.65	7.67	11.62	10.45	1	1.58
hsa-miR-769-3p	Endogenous1	1.2	3.34	2.04	7.26	1.27	1	1.2	8.69	2.18	1.01	1	2.19
hsa-miR-769-5p	Endogenous1	1.87	128.95	62.94	16.18	6.27	29.69	3.37	5.64	5.09	31.73	40.11	7.7
hsa-miR-770-5p	Endogenous1	1	3.34	2.04	1.11	1.27	1	1	8.69	2.18	1.01	1	1
hsa-miR-802	Endogenous1	1.87	18.64	3.7	7.26	10.09	6.77	12.05	2.59	11.62	8.42	5.63	5.25
hsa-miR-873-3p	Endogenous1	1	8.61	28.22	40.7	20.28	11.63	6.99	1.02	15.97	18.56	13.38	10.14
hsa-miR-873-5p	Endogenous1	1	3.34	2.04	1.11	1.27	1.91	1	1.02	2.92	1.33	1	1
hsa-miR-874-3p	Endogenous1	1	3.34	2.04	1.11	1.27	1	1	1.02	2.18	1.01	1	1
hsa-miR-874-5p	Endogenous1	4.57	65.44	9.83	10.6	1.27	13.72	1.93	3.6	26.86	21.6	14.25	7.7
hsa-miR-875-3p	Endogenous1	1	3.34	2.04	1.11	1.27	1	1	1.02	5.09	1.01	1	1
hsa-miR-876-3p	Endogenous1	3.22	3.34	2.04	8.37	1.27	1	1	1.02	20.33	7.41	1	1.58
hsa-miR-876-5p	Endogenous1	1	3.34	2.04	1.11	1.27	1	1	1.02	2.18	1.01	1	1
hsa-miR-877-5p	Endogenous1	1	5.27	7.79	3.91	1.27	1	1	1.02	2.18	2.34	3.04	5.25
hsa-miR-885-3p	Endogenous1	1	18.64	3.7	3.91	1.27	1	1	1.02	5.09	1.01	1	1
hsa-miR-885-5p	Endogenous1	1	3.34	2.04	1.11	1.27	1	1	1.02	2.18	1.01	1	1
hsa-miR-887-3p	Endogenous1	1	11.96	2.04	16.18	1.27	1.21	1	13.78	13.8	1.01	1.32	5.25
hsa-miR-887-5p	Endogenous1	5.92	5.27	2.04	8.37	1.27	3.3	1	9.71	2.92	1.01	1.32	4.02
hsa-miR-888-5p	Endogenous1	4.57	88.84	67.03	17.29	34.3	17.19	11.33	16.84	15.97	22.61	18.56	6.47
hsa-miR-889-3p	Endogenous1	1	55.41	42.52	11.72	1.27	1	1.93	1.02	2.92	11.46	19.42	8.31
hsa-miR-890	Endogenous1	1	11.96	2.04	25.09	1.27	16.5	1.2	6.66	33.38	10.45	1	2.8
hsa-miR-891a-5p	Endogenous1	5.92	28.67	36.39	15.06	12.64	2.6	6.26	10.73	26.86	15.52	9.94	6.47
hsa-miR-891b	Endogenous1	1.87	65.44	32.3	5.03	10.09	1	1.2	1.02	7.27	6.39	7.35	1.58
hsa-miR-892a	Endogenous1	3.89	11.96	2.04	21.75	8.82	7.47	1.2	2.59	33.38	13.49	1	2.8
hsa-miR-892b	Endogenous1	1	3.34	2.04	1.11	1.27	1	1	1.02	2.18	1.01	1	1
hsa-miR-9-5p	Endogenous1	1	239.26	261.1	74.15	1.27	166.54	1	1.02	2.18	233.42	422.82	116.6
hsa-miR-922	Endogenous1	5.92	3.34	2.04	15.06	7.54	3.3	10.6	9.71	15.97	3.35	1.32	4.64
hsa-miR-924	Endogenous1	1	3.34	2.04	1.11	1.27	1	1	1.02	2.18	1.01	1	1
hsa-miR-92a-1-5p	Endogenous1	1	3.34	2.04	1.11	1.27	1	1	1.02	2.18	2.34	1	1
hsa-miR-92a-3p	Endogenous1	1	38.7	56.82	25.09	6.27	15.11	1	6.66	2.18	22.61	32.35	7.08
hsa-miR-92b-3p	Endogenous1	1	3.34	5.74	1.11	11.36	1	1	5.64	2.18	5.38	7.35	2.19
hsa-miR-93-5p	Endogenous1	13.33	1168.52	733	67.46	10.09	663.21	9.16	6.66	13.8	389.49	386.62	86.62
hsa-miR-933	Endogenous1	1	3.34	2.04	19.52	4.99	5.38	1	6.66	13.8	18.56	1	4.02
hsa-miR-934	Endogenous1	1	35.35	2.04	10.6	1.27	1	2.65	1.02	2.18	1.01	1	1
hsa-miR-935	Endogenous1	1.2	3.34	2.04	15.06	1.27	1	1	1.57	20.33	11.46	3.04	1
hsa-miR-936	Endogenous1	1.2	55.41	9.83	15.06	6.27	6.08	6.26	10.73	26.86	14.5	3.04	4.64
hsa-miR-937-3p	Endogenous1	3.89	3.34	2.04	1.11	2.44	6.08	5.54	1.57	2.18	5.38	1	3.41
hsa-miR-939-5p	Endogenous1	3.22	11.96	2.04	9.49	1.27	1	1	8.69	5.09	10.45	1	1
hsa-miR-940	Endogenous1	1	3.34	2.04	3.91	1.27	1	1	1.02	2.18	1.01	1	1
hsa-miR-941	Endogenous1	1	3.34	2.04	1.11	3.72	1	1	1.02	2.18	1.01	6.49	1
hsa-miR-942-3p	Endogenous1	1	3.34	2.04	12.83	1.27	1	1	1.57	9.45	1.01	1	1
hsa-miR-942-5p	Endogenous1	1	15.3	3.7	3.91	3.72	1	1.2	1.57	7.27	11.46	1	1
hsa-miR-944	Endogenous1	1	3.34	2.04	1.11	1.27	1	1	1.02	2.18	4.37	1	1
hsa-miR-95-3p	Endogenous1	3.89	172.4	56.82	18.4	26.65	43.59	12.77	5.64	2.18	45.92	34.07	18.1
hsa-miR-96-5p	Endogenous1	5.24	42.04	81.33	12.83	1.27	16.5	7.71	3.6	11.62	17.54	18.56	7.08
hsa-miR-98-3p	Endogenous1	1	3.34	2.04	17.29	2.44	4.69	3.37	2.59	15.97	1.01	1	1
hsa-miR-98-5p	Endogenous1	11.98	991.36	1037.39	214.62	1.27	497.19	1	1.57	2.18	526.31	1138.25	365.61
hsa-miR-99a-5p	Endogenous1	19.4	3702.26	12126	1358.44	44.49	2608.21	1.93	92.16	105.2	3779.61	7458.18	2574.86
hsa-miR-99b-5p	Endogenous1	5.24	1198.6	941.38	81.95	26.65	251.28	6.26	33.12	35.56	204.02	527.12	158.81
ACTB	Housekeeping	4058.72	1740.11	2577.71	2281.53	3360.79	2401.2	3350.67	3349.26	2960.56	2742.81	2769.95	3455.26
B2M	Housekeeping	5483.58	21933.2	16070.8	16732.1	5419.63	11897.7	7681.41	9646.68	9041.26	19163.3	9468.29	11753.9
GAPDH	Housekeeping	4280.47	2632.6	2205.91	1352.87	5748.33	3422.33	3364.41	3009.3	1776.63	2359.71	2254.5	2525.91
RPL19	Housekeeping	3482.45	5156.31	4199.74	8590.42	2857.55	3762.01	3527.84	4068.88	8451.47	4415.07	6271.26	4314.24
RPLP0	Housekeeping	3839.67	2458.79	3319.27	2871.28	4257.71	3463.31	4169.96	3220	3169.49	2326.27	3435.39	2878.32
LIG_NEG_A	Ligation	4.57	8.61	3.7	3.91	1.27	10.94	4.82	2.59	13.8	10.45	1	1
LIG_NEG_B	Ligation	2.55	32.01	2.04	20.63	3.72	7.47	14.94	3.6	33.38	12.48	2.18	1
LIG_NEG_C	Ligation	1	3.34	2.04	1.11	1.27	1	1	1.02	2.18	1.01	1	1
LIG_POS_A	Ligation	109.71	42209.8	34278.8	850.08	9790.83	26733.1	746.01	3196.59	2214.08	11543.9	10856.9	2188.81
LIG_POS_B	Ligation	22.09	8639.37	7229.31	206.81	1996.31	5438.18	194.27	720.17	492.59	2257.35	2309.66	502.65
LIG_POS_C	Ligation	1.87	1863.79	1525.63	50.74	564.29	1174.46	20	135.92	116.09	504.02	445.23	84.78
NEG_A	Negative	1	7.58	3.81	5.51	1	1	1	1	7.34	2.31	1	3.58
NEG_B	Negative	1.78	1	1	1	5.92	1	1	1	1.34	1	1	1.58
NEG_C	Negative	10.78	5.58	16.81	8.51	5.92	17.75	7.66	6.54	6.34	20.31	13.53	5.58
NEG_D	Negative	1	1.58	1	1	1.92	1	1	1	1	1	1	2.58
NEG_E	Negative	3.78	7.58	5.81	3.51	1	7.75	1	5.54	12.34	5.31	11.53	3.58
NEG_F	Negative	10.78	5.58	4.81	19.51	6.92	1.75	14.66	3.54	6.34	11.31	12.53	4.58
NEG_G	Negative	1	1	1	1	1	1	1	1	1	1	1	1
NEG_H	Negative	1.78	1	1	1.51	1	5.75	1	4.54	1	1	1	1.58
POS_A	Positive	31564.8	28871.6	28088.8	33842.5	27858.9	17493.8	24628.7	26324.5	25108.3	26496.3	18872.5	24270.6
POS_B	Positive	10821.8	10034.6	9864.81	11909.5	10234.9	7134.75	8910.66	9353.54	8953.34	9520.31	7018.53	9318.58
POS_C	Positive	2640.78	2556.58	2357.81	2944.51	2529.92	1756.75	2228.66	2353.54	2144.34	2346.31	1776.53	2402.58
POS_D	Positive	501.78	479.58	429.81	508.51	401.92	258.75	357.66	423.54	396.34	419.31	327.53	391.58
POS_E	Positive	75.78	82.58	57.81	100.51	86.92	43.75	74.66	80.54	69.34	73.31	46.53	81.58
POS_F	Positive	64.78	86.58	53.81	83.51	46.92	43.75	49.66	65.54	58.34	43.31	36.53	35.58
ath-miR159a	SpikeIn	1	8.61	2.04	6.14	1.27	3.3	1.2	3.6	2.18	1.01	1	1
cel-miR-248	SpikeIn	1	3.34	2.04	1.11	1.27	1	1	5.64	7.27	1.01	1	1
cel-miR-254	SpikeIn	1	28.67	11.87	12.83	21.56	2.6	4.82	7.67	15.97	4.37	11.66	4.64
osa-miR414	SpikeIn	3.22	28.67	2.04	2.8	24.1	6.08	7.71	9.71	22.5	11.46	5.63	7.08
osa-miR442	SpikeIn	1	85.49	87.46	11.72	3.72	27.61	2.65	9.71	5.09	30.72	28.04	11.37

## Sheet: S1. group
Gene Name	Accession #	Class Name	HPV+C+	HPV+C-	HPV-C+	HPV-C-
hsa-let-7a-5p	MIMAT0000062	Endogenous1	19705.8	8.07	569.09	9519.56
hsa-let-7b-5p	MIMAT0000063	Endogenous1	9786.39	307.75	2147.4	6401.25
hsa-let-7c-5p	MIMAT0000064	Endogenous1	3562.69	26.7	554.34	876.79
hsa-let-7d-5p	MIMAT0000065	Endogenous1	733.21	10.68	132.29	339.56
hsa-let-7e-5p	MIMAT0000066	Endogenous1	278.14	4.15	31.87	153.39
hsa-let-7f-5p	MIMAT0000067	Endogenous1	315.52	1.3	28.87	122.49
hsa-let-7g-5p	MIMAT0000414	Endogenous1	1969.91	2.16	152.98	934.94
hsa-let-7i-5p	MIMAT0000415	Endogenous1	1241	3.15	178.77	390.46
hsa-miR-1-3p	MIMAT0000416	Endogenous1	71.16	9.83	7.53	6.01
hsa-miR-1-5p	MIMAT0031892	Endogenous1	1	1.3	1.12	1.9
hsa-miR-100-5p	MIMAT0000098	Endogenous1	916.12	4.27	114.31	125.1
hsa-miR-101-3p	MIMAT0000099	Endogenous1	1	1.3	1.12	1.9
hsa-miR-103a-3p	MIMAT0000101	Endogenous1	1	1.99	1.4	1.9
hsa-miR-105-5p	MIMAT0000102	Endogenous1	5.39	3.86	5.63	9.72
hsa-miR-106a-5p+hsa-miR-17-5p	MIMAT0000103	Endogenous1	82.15	1.3	11.95	50.53
hsa-miR-106b-5p	MIMAT0000680	Endogenous1	48.61	1.51	10.6	32.54
hsa-miR-107	MIMAT0000104	Endogenous1	98.87	10.73	36	87.34
hsa-miR-10a-5p	MIMAT0000253	Endogenous1	315.88	7.18	35.87	160.95
hsa-miR-10b-5p	MIMAT0000254	Endogenous1	416.63	9.18	98.41	197.83
hsa-miR-1178-3p	MIMAT0005823	Endogenous1	1	1.3	1.29	1.9
hsa-miR-1180-3p	MIMAT0005825	Endogenous1	56.03	9.71	23.07	80.67
hsa-miR-1183	MIMAT0005828	Endogenous1	11.51	2.53	5.35	4.44
hsa-miR-1185-1-3p	MIMAT0022838	Endogenous1	1	1.3	1.12	1.9
hsa-miR-1185-2-3p	MIMAT0022713	Endogenous1	4.83	4.71	6.35	9.2
hsa-miR-1185-5p	MIMAT0005798	Endogenous1	5.11	2.92	6.65	8.52
hsa-miR-1193	MIMAT0015049	Endogenous1	2.95	1.3	2.05	2.76
hsa-miR-1197	MIMAT0005955	Endogenous1	9	20.34	12.93	14.65
hsa-miR-1200	MIMAT0005863	Endogenous1	1	1.3	5.45	2.6
hsa-miR-1202	MIMAT0005865	Endogenous1	1.51	1.3	1.12	1.9
hsa-miR-1203	MIMAT0005866	Endogenous1	1.42	2.21	3.63	2.9
hsa-miR-1204	MIMAT0005868	Endogenous1	3.37	2.75	3.68	2.76
hsa-miR-1205	MIMAT0005869	Endogenous1	1	1.3	1.12	2.6
hsa-miR-1206	MIMAT0005870	Endogenous1	2.12	1.3	1.12	4.33
hsa-miR-122-5p	MIMAT0000421	Endogenous1	1	1.3	2.82	1.9
hsa-miR-1224-3p	MIMAT0005459	Endogenous1	1	1.3	1.29	3.36
hsa-miR-1224-5p	MIMAT0005458	Endogenous1	1	1.44	1.91	1.9
hsa-miR-1226-3p	MIMAT0005577	Endogenous1	1.3	1.3	1.12	2.6
hsa-miR-1228-3p	MIMAT0005583	Endogenous1	1.42	1.73	2.12	3.55
hsa-miR-1233-3p	MIMAT0005588	Endogenous1	7.16	1.44	1.67	3.67
hsa-miR-1234-3p	MIMAT0005589	Endogenous1	7.13	3.24	4.99	5.26
hsa-miR-1236-3p	MIMAT0005591	Endogenous1	8.34	5.08	8.27	6.75
hsa-miR-124-3p	MIMAT0000422	Endogenous1	1	1.79	2.97	1.9
hsa-miR-1244	MIMAT0005896	Endogenous1	4.88	3.17	11.55	3.73
hsa-miR-1245a	MIMAT0005897	Endogenous1	1.69	1.39	1.29	2.8
hsa-miR-1245b-3p	MIMAT0019951	Endogenous1	1.5	2.41	6.98	1.9
hsa-miR-1245b-5p	MIMAT0019950	Endogenous1	1.1	1.73	1.53	1.9
hsa-miR-1246	MIMAT0005898	Endogenous1	4.67	1.3	1.12	1.9
hsa-miR-1247-5p	MIMAT0005899	Endogenous1	39.49	1.3	3.43	8.73
hsa-miR-1248	MIMAT0005900	Endogenous1	1.63	4.48	2.95	2.8
hsa-miR-1249-3p	MIMAT0005901	Endogenous1	2.19	2.41	3.83	2.02
hsa-miR-1249-5p	MIMAT0032029	Endogenous1	1	1.3	1.12	2.21
hsa-miR-1250-5p	MIMAT0005902	Endogenous1	1	1.3	1.12	1.9
hsa-miR-1252-5p	MIMAT0005944	Endogenous1	1.63	1.3	1.12	2.21
hsa-miR-1253	MIMAT0005904	Endogenous1	1	1.3	1.12	1.9
hsa-miR-1254	MIMAT0005905	Endogenous1	1.17	1.3	1.12	1.9
hsa-miR-1255a	MIMAT0005906	Endogenous1	12.4	9.95	7.79	3.12
hsa-miR-1255b-5p	MIMAT0005945	Endogenous1	1	1.3	1.99	2.02
hsa-miR-1257	MIMAT0005908	Endogenous1	2.03	2.31	3.8	13.22
hsa-miR-1258	MIMAT0005909	Endogenous1	5.36	7.31	2.42	7.24
hsa-miR-125a-3p	MIMAT0004602	Endogenous1	3.87	2.76	4.63	3.73
hsa-miR-125a-5p	MIMAT0000443	Endogenous1	446.4	11.58	117.7	197.46
hsa-miR-125b-5p	MIMAT0000423	Endogenous1	7173.88	94	1868.04	1577.26
hsa-miR-126-3p	MIMAT0000445	Endogenous1	4769.67	25.68	423.6	2951.42
hsa-miR-1260a	MIMAT0005911	Endogenous1	97.24	4.41	49.44	51.75
hsa-miR-1260b	MIMAT0015041	Endogenous1	3.79	2.28	1.63	4.63
hsa-miR-1261	MIMAT0005913	Endogenous1	1.1	1.62	1.53	2.59
hsa-miR-1262	MIMAT0005914	Endogenous1	2.98	3.52	2.44	2.21
hsa-miR-1264	MIMAT0005791	Endogenous1	2.74	14.13	15.2	8.36
hsa-miR-1266-5p	MIMAT0005920	Endogenous1	1	1.95	1.86	4.47
hsa-miR-1268a	MIMAT0005922	Endogenous1	1	1.3	1.12	1.9
hsa-miR-1268b	MIMAT0018925	Endogenous1	5.92	11.85	5.12	5.74
hsa-miR-1269a	MIMAT0005923	Endogenous1	3.09	1.3	1.53	3.15
hsa-miR-1269b	MIMAT0019059	Endogenous1	1	2.66	1.29	1.9
hsa-miR-127-3p	MIMAT0000446	Endogenous1	457.45	9.45	86.02	111.31
hsa-miR-127-5p	MIMAT0004604	Endogenous1	2.27	5.36	4.37	3.08
hsa-miR-1270	MIMAT0005924	Endogenous1	2.64	2.31	10.79	4.88
hsa-miR-1271-3p	MIMAT0022712	Endogenous1	1	1.3	1.12	1.9
hsa-miR-1271-5p	MIMAT0005796	Endogenous1	1	1.3	2.1	5.69
hsa-miR-1272	MIMAT0005925	Endogenous1	2.19	1.39	1.12	3.84
hsa-miR-1273c	MIMAT0015017	Endogenous1	1.69	1.99	1.86	1.9
hsa-miR-1275	MIMAT0005929	Endogenous1	1	1.3	1.12	1.9
hsa-miR-1276	MIMAT0005930	Endogenous1	2.75	2.57	5.54	3.96
hsa-miR-1277-3p	MIMAT0005933	Endogenous1	3.94	2.66	1.6	7.64
hsa-miR-1278	MIMAT0005936	Endogenous1	1	1.3	1.12	1.9
hsa-miR-1279	MIMAT0005937	Endogenous1	1.46	1.3	1.4	2.21
hsa-miR-128-1-5p	MIMAT0026477	Endogenous1	8.56	2.63	7.38	11.52
hsa-miR-128-2-5p	MIMAT0031095	Endogenous1	1	1.78	1.12	1.9
hsa-miR-128-3p	MIMAT0000424	Endogenous1	1	1.3	1.12	1.9
hsa-miR-1281	MIMAT0005939	Endogenous1	5.73	3.06	6.04	5.42
hsa-miR-1283	MIMAT0005799	Endogenous1	1	1.3	1.12	1.9
hsa-miR-1285-3p	MIMAT0005876	Endogenous1	3.55	11.1	7.3	15.53
hsa-miR-1285-5p	MIMAT0022719	Endogenous1	14.49	7.56	18.11	43.6
hsa-miR-1286	MIMAT0005877	Endogenous1	1	1.44	1.12	1.9
hsa-miR-1287-3p	MIMAT0026738	Endogenous1	1.1	1.3	2.29	2.31
hsa-miR-1287-5p	MIMAT0005878	Endogenous1	5.09	3.46	4.03	6.18
hsa-miR-1288-3p	MIMAT0005942	Endogenous1	1	1.3	1.12	1.9
hsa-miR-1289	MIMAT0005879	Endogenous1	1	1.3	1.61	2.59
hsa-miR-129-2-3p	MIMAT0004605	Endogenous1	4.59	2.6	1.53	1.9
hsa-miR-129-5p	MIMAT0000242	Endogenous1	1.63	2.54	1.61	3.88
hsa-miR-1290	MIMAT0005880	Endogenous1	10.71	12.34	7.25	20.58
hsa-miR-1291	MIMAT0005881	Endogenous1	1.5	2.87	2.35	1.9
hsa-miR-1293	MIMAT0005883	Endogenous1	1	1.44	1.53	1.9
hsa-miR-1295a	MIMAT0005885	Endogenous1	7.66	4.31	7.8	9.29
hsa-miR-1296-3p	MIMAT0026637	Endogenous1	3.39	6.09	10.33	6.75
hsa-miR-1296-5p	MIMAT0005794	Endogenous1	1	1.73	1.12	1.9
hsa-miR-1297	MIMAT0005886	Endogenous1	1.75	5.15	4.16	5.5
hsa-miR-1298-5p	MIMAT0005800	Endogenous1	6.03	2.44	3.64	5.33
hsa-miR-1299	MIMAT0005887	Endogenous1	13.52	10.16	16.5	8.31
hsa-miR-1301-3p	MIMAT0005797	Endogenous1	1	1.3	1.12	1.9
hsa-miR-1302	MIMAT0005890	Endogenous1	2.28	1.99	2.54	2.98
hsa-miR-1303	MIMAT0005891	Endogenous1	1.43	3.46	1.29	3.15
hsa-miR-1304-3p	MIMAT0022720	Endogenous1	1	1.99	1.12	2.21
hsa-miR-1304-5p	MIMAT0005892	Endogenous1	2.41	5.64	5.28	3.55
hsa-miR-1305	MIMAT0005893	Endogenous1	1.51	2.66	3.74	2.6
hsa-miR-1306-3p	MIMAT0005950	Endogenous1	4.24	9.83	8.85	4.69
hsa-miR-1306-5p	MIMAT0022726	Endogenous1	2.95	4.11	3.44	2.96
hsa-miR-1307-3p	MIMAT0005951	Endogenous1	10.31	7.27	7.42	16.88
hsa-miR-1307-5p	MIMAT0022727	Endogenous1	6.84	7.54	7.3	7.56
hsa-miR-130a-3p	MIMAT0000425	Endogenous1	2607.96	11.13	269.06	1062.81
hsa-miR-130b-3p	MIMAT0000691	Endogenous1	1	1.3	1.12	1.9
hsa-miR-132-3p	MIMAT0000426	Endogenous1	84.24	2.56	14.17	54.88
hsa-miR-1322	MIMAT0005953	Endogenous1	2.52	2.25	2.2	1.9
hsa-miR-1323	MIMAT0005795	Endogenous1	3.88	4.9	8.13	12.97
hsa-miR-133a-3p	MIMAT0000427	Endogenous1	35.98	1.99	4.37	7.03
hsa-miR-133a-5p	MIMAT0026478	Endogenous1	2.95	4.83	5.61	4.56
hsa-miR-133b	MIMAT0000770	Endogenous1	1	1.3	1.12	1.9
hsa-miR-134-3p	MIMAT0026481	Endogenous1	4.11	3.03	3.3	1.9
hsa-miR-134-5p+hsa-miR-6728-5p	MIMAT0000447	Endogenous1	1	1.3	1.49	1.9
hsa-miR-135a-5p	MIMAT0000428	Endogenous1	82.67	1.3	9.81	76.41
hsa-miR-135b-5p	MIMAT0000758	Endogenous1	169.77	2.44	41.42	123.88
hsa-miR-136-5p	MIMAT0000448	Endogenous1	387.47	1.3	22.53	98.62
hsa-miR-137	MIMAT0000429	Endogenous1	4.8	4.35	6.32	2.98
hsa-miR-138-5p	MIMAT0000430	Endogenous1	6.03	7.17	3.4	8.59
hsa-miR-139-3p	MIMAT0004552	Endogenous1	3.02	2.87	8.94	7.87
hsa-miR-139-5p	MIMAT0000250	Endogenous1	1	1.3	1.12	1.9
hsa-miR-140-3p	MIMAT0004597	Endogenous1	8.99	2.44	2.42	5.66
hsa-miR-140-5p	MIMAT0000431	Endogenous1	251.85	3.61	21.25	137.18
hsa-miR-141-3p	MIMAT0000432	Endogenous1	285.65	8.69	54.19	406.78
hsa-miR-142-3p	MIMAT0000434	Endogenous1	2625.4	3.73	245.19	1359.01
hsa-miR-142-5p	MIMAT0000433	Endogenous1	1	1.3	1.99	1.9
hsa-miR-143-3p	MIMAT0000435	Endogenous1	1604.27	1.3	8.74	240.59
hsa-miR-144-3p	MIMAT0000436	Endogenous1	375.67	3.75	59.9	300.78
hsa-miR-145-5p	MIMAT0000437	Endogenous1	2736.49	26.11	237.55	591.84
hsa-miR-1469	MIMAT0007347	Endogenous1	1	1.95	2.89	2.6
hsa-miR-146a-5p	MIMAT0000449	Endogenous1	127.58	5.83	65.66	92.23
hsa-miR-146b-3p	MIMAT0004766	Endogenous1	1	1.3	1.12	1.9
hsa-miR-146b-5p	MIMAT0002809	Endogenous1	27.01	4.81	21.15	30.84
hsa-miR-147a	MIMAT0000251	Endogenous1	5.35	4.06	2.93	2.6
hsa-miR-147b	MIMAT0004928	Endogenous1	3.48	7.13	4.31	5.65
hsa-miR-148a-3p	MIMAT0000243	Endogenous1	1187.43	1.99	64.84	493.06
hsa-miR-148b-3p	MIMAT0000759	Endogenous1	427.77	4.94	37.88	156.55
hsa-miR-149-5p	MIMAT0000450	Endogenous1	29.09	8.69	28.58	25.78
hsa-miR-150-5p	MIMAT0000451	Endogenous1	2622.27	199.81	848.14	1479.21
hsa-miR-151a-3p	MIMAT0000757	Endogenous1	55.13	3.11	12.97	40.34
hsa-miR-151a-5p	MIMAT0004697	Endogenous1	63.04	1.44	10.79	29.83
hsa-miR-151b	MIMAT0010214	Endogenous1	3.69	1.44	3.94	4.03
hsa-miR-152-3p	MIMAT0000438	Endogenous1	48.44	2.75	13.39	27.83
hsa-miR-152-5p	MIMAT0026479	Endogenous1	1	1.3	1.12	1.9
hsa-miR-153-3p	MIMAT0000439	Endogenous1	2.79	3.76	1.86	1.9
hsa-miR-1537-3p	MIMAT0007399	Endogenous1	3.27	1.3	2.27	5.36
hsa-miR-154-5p	MIMAT0000452	Endogenous1	126.14	2.16	16.62	39.15
hsa-miR-155-5p	MIMAT0000646	Endogenous1	46.12	1.3	20.91	37
hsa-miR-15a-5p	MIMAT0000068	Endogenous1	672.97	1.99	51.45	436.52
hsa-miR-15b-5p	MIMAT0000417	Endogenous1	459.22	5.45	75.2	196.61
hsa-miR-16-5p	MIMAT0000069	Endogenous1	533.65	12.62	141.08	325.49
hsa-miR-181a-2-3p	MIMAT0004558	Endogenous1	1.28	5.29	7	4.92
hsa-miR-181a-3p	MIMAT0000270	Endogenous1	13.95	18.08	15.71	11.65
hsa-miR-181a-5p	MIMAT0000256	Endogenous1	1412.39	16.34	182.31	949.54
hsa-miR-181b-2-3p	MIMAT0031893	Endogenous1	4.24	1.79	8.39	7.34
hsa-miR-181b-5p+hsa-miR-181d-5p	MIMAT0000257	Endogenous1	38.32	1.62	7.8	26.1
hsa-miR-181c-5p	MIMAT0000258	Endogenous1	45.09	1.53	9.23	31.05
hsa-miR-181d-3p	MIMAT0026608	Endogenous1	4.02	3.69	4.75	2.21
hsa-miR-182-3p	MIMAT0000260	Endogenous1	1	2.16	1.86	1.9
hsa-miR-182-5p	MIMAT0000259	Endogenous1	1	1.3	2.33	3.54
hsa-miR-1827	MIMAT0006767	Endogenous1	3.12	2.64	2.93	9.66
hsa-miR-183-5p	MIMAT0000261	Endogenous1	10.56	5.99	15.11	39.11
hsa-miR-184	MIMAT0000454	Endogenous1	1.17	4.66	8.28	7.69
hsa-miR-185-5p	MIMAT0000455	Endogenous1	10.96	4.9	15.25	21.16
hsa-miR-186-5p	MIMAT0000456	Endogenous1	23.71	9.49	16.16	21.33
hsa-miR-187-3p	MIMAT0000262	Endogenous1	13.91	3.82	11.33	20.61
hsa-miR-188-3p	MIMAT0004613	Endogenous1	1	1.3	1.98	2.46
hsa-miR-188-5p	MIMAT0000457	Endogenous1	31.33	11.99	29.11	57.95
hsa-miR-18a-5p	MIMAT0000072	Endogenous1	16.75	4.03	13.35	15.21
hsa-miR-18b-5p	MIMAT0001412	Endogenous1	2.91	11.87	5.62	12.56
hsa-miR-1908-3p	MIMAT0026916	Endogenous1	1.2	2.53	5.48	5.97
hsa-miR-1908-5p	MIMAT0007881	Endogenous1	4.32	2.99	5.11	12.56
hsa-miR-1909-3p	MIMAT0007883	Endogenous1	1.1	1.3	1.53	2.34
hsa-miR-190a-3p	MIMAT0026482	Endogenous1	3.55	1.78	1.12	2.6
hsa-miR-190a-5p	MIMAT0000458	Endogenous1	217.78	1.3	14.2	21.72
hsa-miR-190b	MIMAT0004929	Endogenous1	1	1.3	1.12	1.9
hsa-miR-191-5p	MIMAT0000440	Endogenous1	1899.38	67.17	542.72	1120.74
hsa-miR-1910-3p	MIMAT0026917	Endogenous1	1	3	2.38	1.9
hsa-miR-1910-5p	MIMAT0007884	Endogenous1	11.58	1.51	5.44	5.68
hsa-miR-1915-3p	MIMAT0007892	Endogenous1	1.1	1.3	1.12	3.67
hsa-miR-192-5p	MIMAT0000222	Endogenous1	1	1.3	1.12	2.6
hsa-miR-193a-3p	MIMAT0000459	Endogenous1	5.35	1.95	4.8	3.73
hsa-miR-193a-5p+hsa-miR-193b-5p	MIMAT0004614	Endogenous1	10.06	1.3	6.79	7.34
hsa-miR-193b-3p	MIMAT0002819	Endogenous1	24.6	2.93	9.75	13.89
hsa-miR-194-5p	MIMAT0000460	Endogenous1	26.49	1.39	9.89	18.01
hsa-miR-195-5p	MIMAT0000461	Endogenous1	281.49	3.24	22.03	45.37
hsa-miR-196a-3p	MIMAT0004562	Endogenous1	1	2.31	1.39	2.59
hsa-miR-196a-5p	MIMAT0000226	Endogenous1	48.62	12.38	28.43	37.68
hsa-miR-196b-5p	MIMAT0001080	Endogenous1	222.15	1.3	15.54	89.32
hsa-miR-197-3p	MIMAT0000227	Endogenous1	2.86	1.73	1.71	7.57
hsa-miR-197-5p	MIMAT0022691	Endogenous1	3.63	2.75	5.41	12.8
hsa-miR-1972	MIMAT0009447	Endogenous1	33.69	11.62	67.1	187.55
hsa-miR-1973	MIMAT0009448	Endogenous1	7.52	9.7	3.35	5.74
hsa-miR-1976	MIMAT0009451	Endogenous1	1.1	3.54	2.31	2.68
hsa-miR-198	MIMAT0000228	Endogenous1	2.11	5.34	5.78	10.23
hsa-miR-199a-3p+hsa-miR-199b-3p	MIMAT0000232	Endogenous1	20795.3	39.83	1527.82	5342.55
hsa-miR-199a-5p	MIMAT0000231	Endogenous1	884.39	9.55	115.84	326.07
hsa-miR-199b-5p	MIMAT0000263	Endogenous1	5056.47	18.48	445.21	1043.29
hsa-miR-19a-3p	MIMAT0000073	Endogenous1	14.85	1.3	4.69	18.49
hsa-miR-19b-3p	MIMAT0000074	Endogenous1	172.2	7.05	47.32	115.06
hsa-miR-200a-3p	MIMAT0000682	Endogenous1	327.23	7.79	57.46	658.23
hsa-miR-200b-3p	MIMAT0000318	Endogenous1	1622.55	9.19	219.42	1543.24
hsa-miR-200c-3p	MIMAT0000617	Endogenous1	329.11	9.88	61.64	287.85
hsa-miR-202-3p	MIMAT0002811	Endogenous1	4.4	4.59	7.5	3.36
hsa-miR-203a-3p	MIMAT0000264	Endogenous1	91.5	7.21	34.99	63.28
hsa-miR-203a-5p	MIMAT0031890	Endogenous1	8.08	10.72	9.66	4.96
hsa-miR-204-5p	MIMAT0000265	Endogenous1	16.14	1.3	4.1	8.06
hsa-miR-205-5p	MIMAT0000266	Endogenous1	1154.55	131.79	573.42	913.66
hsa-miR-2053	MIMAT0009978	Endogenous1	11.72	14.43	15.88	12.1
hsa-miR-206	MIMAT0000462	Endogenous1	2.03	1.73	1.98	3.35
hsa-miR-208a-3p	MIMAT0000241	Endogenous1	8.56	3.22	7.43	19.97
hsa-miR-208b-3p	MIMAT0004960	Endogenous1	6.67	13.84	11.67	4.06
hsa-miR-208b-5p	MIMAT0026722	Endogenous1	1.3	2.28	2.76	1.9
hsa-miR-20a-5p+hsa-miR-20b-5p	MIMAT0000075	Endogenous1	115.18	4.99	39.55	70.1
hsa-miR-21-5p	MIMAT0000076	Endogenous1	1684.11	2.56	183.25	1280.02
hsa-miR-210-3p	MIMAT0000267	Endogenous1	3.71	1.3	2.64	3.15
hsa-miR-210-5p	MIMAT0026475	Endogenous1	7.89	6.4	12.31	16.44
hsa-miR-211-3p	MIMAT0022694	Endogenous1	1	1.3	1.12	1.9
hsa-miR-211-5p	MIMAT0000268	Endogenous1	2.44	6.71	5.05	2.98
hsa-miR-2110	MIMAT0010133	Endogenous1	3.4	11.9	4.41	3.58
hsa-miR-2113	MIMAT0009206	Endogenous1	1	1.3	1.12	3.21
hsa-miR-2116-5p	MIMAT0011160	Endogenous1	1	1.3	1.12	1.9
hsa-miR-2117	MIMAT0011162	Endogenous1	2.19	1.95	5.79	6.55
hsa-miR-212-3p	MIMAT0000269	Endogenous1	9.05	10.87	6.74	19.32
hsa-miR-214-3p	MIMAT0000271	Endogenous1	20.46	1.3	3.05	14.54
hsa-miR-215-5p	MIMAT0000272	Endogenous1	1	1.3	1.12	1.9
hsa-miR-216a-5p	MIMAT0000273	Endogenous1	5.22	2.46	1.99	2.9
hsa-miR-216b-5p	MIMAT0004959	Endogenous1	11.7	1.44	12.02	14.46
hsa-miR-217	MIMAT0000274	Endogenous1	4.5	2.93	4.57	7.95
hsa-miR-218-5p	MIMAT0000275	Endogenous1	525.59	2.13	56.68	148.37
hsa-miR-219a-1-3p	MIMAT0004567	Endogenous1	2.27	1.99	4.81	1.9
hsa-miR-219a-2-3p	MIMAT0004675	Endogenous1	6.35	2.13	3.17	4.75
hsa-miR-219a-5p	MIMAT0000276	Endogenous1	3.67	1.66	4.45	1.9
hsa-miR-219b-3p	MIMAT0019748	Endogenous1	1	3.24	2.86	4.22
hsa-miR-22-3p	MIMAT0000077	Endogenous1	123.28	1.3	14.52	65.99
hsa-miR-221-3p	MIMAT0000278	Endogenous1	51.16	14.37	38.08	81.02
hsa-miR-221-5p	MIMAT0004568	Endogenous1	8.47	1.3	3.62	4.32
hsa-miR-222-3p	MIMAT0000279	Endogenous1	740.16	4.66	112.33	232.17
hsa-miR-223-3p	MIMAT0000280	Endogenous1	1763.1	20.02	350.43	2154.5
hsa-miR-224-5p	MIMAT0000281	Endogenous1	3.94	2.16	3.28	5.04
hsa-miR-2278	MIMAT0011778	Endogenous1	1	1.3	1.29	1.9
hsa-miR-23a-3p	MIMAT0000078	Endogenous1	11186.8	165.65	2067.71	7375.81
hsa-miR-23b-3p	MIMAT0000418	Endogenous1	1747.98	19.66	231.99	1095.62
hsa-miR-23c	MIMAT0018000	Endogenous1	3.56	4.88	1.78	2.31
hsa-miR-24-3p	MIMAT0000080	Endogenous1	75.58	1.3	12.66	75.22
hsa-miR-25-3p	MIMAT0000081	Endogenous1	632.25	3.64	107.87	178.15
hsa-miR-25-5p	MIMAT0004498	Endogenous1	2.79	8.16	4.5	4.21
hsa-miR-2682-5p	MIMAT0013517	Endogenous1	2.27	1.3	3.62	1.9
hsa-miR-26a-5p	MIMAT0000082	Endogenous1	1024.27	14.34	131.13	549.42
hsa-miR-26b-5p	MIMAT0000083	Endogenous1	1086.14	8.41	136.74	553.09
hsa-miR-27a-3p	MIMAT0000084	Endogenous1	6.99	1.44	3.59	3.15
hsa-miR-27b-3p	MIMAT0000419	Endogenous1	864.93	2.31	88.31	367.79
hsa-miR-28-3p	MIMAT0004502	Endogenous1	37.06	3.22	14.02	47.48
hsa-miR-28-5p	MIMAT0000085	Endogenous1	628.11	17.64	66.22	310.97
hsa-miR-296-3p	MIMAT0004679	Endogenous1	1.58	3.82	1.12	3.66
hsa-miR-296-5p	MIMAT0000690	Endogenous1	52.47	1.44	16.19	19.97
hsa-miR-297	MIMAT0004450	Endogenous1	1	1.3	1.12	1.9
hsa-miR-298	MIMAT0004901	Endogenous1	2.03	2.56	5.13	2.02
hsa-miR-299-3p	MIMAT0000687	Endogenous1	17.58	1.3	7.05	9.55
hsa-miR-299-5p	MIMAT0002890	Endogenous1	99.55	11.11	23.06	62.31
hsa-miR-29a-3p	MIMAT0000086	Endogenous1	578.22	4.97	141.45	381.8
hsa-miR-29b-3p	MIMAT0000100	Endogenous1	6136.62	16.41	358.42	3882.94
hsa-miR-29c-3p	MIMAT0000681	Endogenous1	723.64	4.21	109.58	279.98
hsa-miR-300	MIMAT0004903	Endogenous1	1	1.39	1.12	1.9
hsa-miR-301a-3p	MIMAT0000688	Endogenous1	93.6	4.41	24.75	90.85
hsa-miR-301a-5p	MIMAT0022696	Endogenous1	3.35	13.82	9.38	4.66
hsa-miR-301b-3p	MIMAT0004958	Endogenous1	2.74	2.69	7.74	6.68
hsa-miR-301b-5p	MIMAT0032026	Endogenous1	7.88	7.94	10.2	6.75
hsa-miR-302a-3p	MIMAT0000684	Endogenous1	1.33	1.3	1.86	2.68
hsa-miR-302a-5p	MIMAT0000683	Endogenous1	1.33	1.3	1.12	1.9
hsa-miR-302b-3p	MIMAT0000715	Endogenous1	2.74	1.95	2.29	3.92
hsa-miR-302c-3p	MIMAT0000717	Endogenous1	1.84	4.81	1.53	8.95
hsa-miR-302d-3p	MIMAT0000718	Endogenous1	1	1.3	1.12	1.9
hsa-miR-302e	MIMAT0005931	Endogenous1	1	1.73	1.12	1.9
hsa-miR-302f	MIMAT0005932	Endogenous1	1.58	1.3	1.39	1.9
hsa-miR-3065-3p	MIMAT0015378	Endogenous1	3.64	2	3.89	7.91
hsa-miR-3065-5p	MIMAT0015066	Endogenous1	1	1.3	3.34	1.9
hsa-miR-3074-3p	MIMAT0015027	Endogenous1	2.53	2	5.58	2.59
hsa-miR-30a-3p	MIMAT0000088	Endogenous1	24.48	5.62	19.93	24.46
hsa-miR-30a-5p	MIMAT0000087	Endogenous1	87.88	1.73	14.12	93.95
hsa-miR-30b-5p	MIMAT0000420	Endogenous1	107.45	2.16	11.71	43.8
hsa-miR-30c-5p	MIMAT0000244	Endogenous1	33.02	1.3	5.74	19.02
hsa-miR-30d-5p	MIMAT0000245	Endogenous1	263.31	2.66	53.82	129.89
hsa-miR-30e-3p	MIMAT0000693	Endogenous1	43.28	1.95	11.26	44.31
hsa-miR-30e-5p	MIMAT0000692	Endogenous1	149.44	8.97	39.29	109.8
hsa-miR-31-5p	MIMAT0000089	Endogenous1	4.14	2.28	4.29	19.39
hsa-miR-3127-5p	MIMAT0014990	Endogenous1	1	1.51	1.12	1.9
hsa-miR-3130-3p	MIMAT0014994	Endogenous1	1.17	1.3	1.86	1.9
hsa-miR-3131	MIMAT0014996	Endogenous1	1.1	7.42	2.83	3.84
hsa-miR-3136-5p	MIMAT0015003	Endogenous1	3.34	4.03	4.49	5.68
hsa-miR-3140-3p	MIMAT0015008	Endogenous1	1	1.73	1.12	1.9
hsa-miR-3140-5p	MIMAT0019204	Endogenous1	1	1.3	1.12	1.9
hsa-miR-3144-3p	MIMAT0015015	Endogenous1	1	2.31	2.5	1.9
hsa-miR-3144-5p	MIMAT0015014	Endogenous1	1.75	1.95	2.56	4.45
hsa-miR-3147	MIMAT0015019	Endogenous1	6.92	5.86	4.72	5.84
hsa-miR-3150b-3p	MIMAT0018194	Endogenous1	1	1.3	2.86	3.36
hsa-miR-3151-5p	MIMAT0015024	Endogenous1	1.1	2.7	4.37	7.39
hsa-miR-3158-3p	MIMAT0015032	Endogenous1	1	1.3	1.12	1.9
hsa-miR-3161	MIMAT0015035	Endogenous1	5.54	3.01	5.95	7.05
hsa-miR-3164	MIMAT0015038	Endogenous1	1	4.83	5.32	2.98
hsa-miR-3168	MIMAT0015043	Endogenous1	2.84	4.46	5.26	5.48
hsa-miR-3179	MIMAT0015056	Endogenous1	1.33	4.11	5.22	3.73
hsa-miR-3180	MIMAT0018178	Endogenous1	2.27	3.79	2.85	3.43
hsa-miR-3180-3p	MIMAT0015058	Endogenous1	1	1.3	1.12	1.9
hsa-miR-3180-5p	MIMAT0015057	Endogenous1	1	1.44	1.12	1.9
hsa-miR-3182	MIMAT0015062	Endogenous1	1.5	1.3	1.99	2.9
hsa-miR-3185	MIMAT0015065	Endogenous1	1	1.44	1.12	1.9
hsa-miR-3190-3p	MIMAT0022839	Endogenous1	1	1.3	1.12	1.9
hsa-miR-3192-5p	MIMAT0015076	Endogenous1	1.5	2.13	1.12	1.9
hsa-miR-3195	MIMAT0015079	Endogenous1	3.28	1.95	3.63	2.31
hsa-miR-3196	MIMAT0015080	Endogenous1	1.72	1.73	3.65	3.36
hsa-miR-32-5p	MIMAT0000090	Endogenous1	243.75	5.07	27.17	108.58
hsa-miR-3202	MIMAT0015089	Endogenous1	1	2.13	4.25	1.9
hsa-miR-320a	MIMAT0000510	Endogenous1	2.01	1.95	3.16	3.36
hsa-miR-320b	MIMAT0005792	Endogenous1	1.91	1.73	1.71	1.9
hsa-miR-320c	MIMAT0005793	Endogenous1	1.75	5.48	14.42	9.21
hsa-miR-320d	MIMAT0006764	Endogenous1	1.3	1.3	2.54	1.9
hsa-miR-320e	MIMAT0015072	Endogenous1	16.96	2.87	10.37	14.43
hsa-miR-323a-3p	MIMAT0000755	Endogenous1	15.2	1.84	4.55	14.83
hsa-miR-323a-5p	MIMAT0004696	Endogenous1	1	1.3	1.12	1.9
hsa-miR-323b-3p	MIMAT0015050	Endogenous1	7.21	11.09	11.12	10.11
hsa-miR-323b-5p	MIMAT0001630	Endogenous1	1	1.3	1.12	1.9
hsa-miR-324-3p	MIMAT0000762	Endogenous1	7.03	8.37	3.75	15.75
hsa-miR-324-5p	MIMAT0000761	Endogenous1	7.99	1.3	3.01	9.52
hsa-miR-325	MIMAT0000771	Endogenous1	4.4	1.73	5.89	4.16
hsa-miR-326	MIMAT0000756	Endogenous1	1	2.64	2.63	2.72
hsa-miR-328-3p	MIMAT0000752	Endogenous1	2.76	1.95	2.99	2.8
hsa-miR-328-5p	MIMAT0026486	Endogenous1	1	1.99	1.12	1.9
hsa-miR-329-3p	MIMAT0001629	Endogenous1	1.84	2.6	6.8	2.9
hsa-miR-329-5p	MIMAT0026555	Endogenous1	5.93	2.83	5	8.93
hsa-miR-330-3p	MIMAT0000751	Endogenous1	1	1.73	2.54	1.9
hsa-miR-330-5p	MIMAT0004693	Endogenous1	1	1.73	1.29	2.21
hsa-miR-331-3p	MIMAT0000760	Endogenous1	11.39	1.66	3.37	18.28
hsa-miR-331-5p	MIMAT0004700	Endogenous1	1	1.3	1.12	1.9
hsa-miR-335-5p	MIMAT0000765	Endogenous1	40.73	2.3	9.56	15.84
hsa-miR-337-3p	MIMAT0000754	Endogenous1	55.17	6.52	19.85	45.52
hsa-miR-337-5p	MIMAT0004695	Endogenous1	87.41	6.29	21.8	50.87
hsa-miR-338-5p	MIMAT0004701	Endogenous1	2.75	4.12	1.53	1.9
hsa-miR-339-3p	MIMAT0004702	Endogenous1	1	1.3	1.12	3.15
hsa-miR-339-5p	MIMAT0000764	Endogenous1	1	1.99	1.53	3.84
hsa-miR-33a-5p	MIMAT0000091	Endogenous1	12.63	1.3	2.6	11.63
hsa-miR-33b-5p	MIMAT0003301	Endogenous1	10.57	12.7	5.66	15.12
hsa-miR-340-5p	MIMAT0004692	Endogenous1	134.41	2.31	29.14	52.75
hsa-miR-342-3p	MIMAT0000753	Endogenous1	492.08	25.24	117.39	214.22
hsa-miR-342-5p	MIMAT0004694	Endogenous1	4.54	1.99	3.54	4.93
hsa-miR-345-3p	MIMAT0022698	Endogenous1	1	1.3	1.12	3.2
hsa-miR-345-5p	MIMAT0000772	Endogenous1	6.41	1.44	5.36	6.51
hsa-miR-346	MIMAT0000773	Endogenous1	3.24	10.26	2.71	4.74
hsa-miR-34a-5p	MIMAT0000255	Endogenous1	237.37	7.84	82.39	257.85
hsa-miR-34b-3p	MIMAT0004676	Endogenous1	3.08	2.56	2.29	6.19
hsa-miR-34c-3p	MIMAT0004677	Endogenous1	5.37	1.3	3.53	13.03
hsa-miR-34c-5p	MIMAT0000686	Endogenous1	23.3	4.46	21.15	86.17
hsa-miR-3605-3p	MIMAT0017982	Endogenous1	1	1.3	1.12	1.9
hsa-miR-3605-5p	MIMAT0017981	Endogenous1	4.42	4.16	4.27	3.66
hsa-miR-361-3p	MIMAT0004682	Endogenous1	76	1.3	10.57	50.63
hsa-miR-361-5p	MIMAT0000703	Endogenous1	237.48	1.99	25.89	85.5
hsa-miR-3613-3p	MIMAT0017991	Endogenous1	1	1.3	1.6	1.9
hsa-miR-3613-5p	MIMAT0017990	Endogenous1	1	1.3	1.12	1.9
hsa-miR-3614-3p	MIMAT0017993	Endogenous1	1	2.41	2.38	1.9
hsa-miR-3614-5p	MIMAT0017992	Endogenous1	2.47	10.17	3.9	11.42
hsa-miR-3615	MIMAT0017994	Endogenous1	2.9	5.61	2.95	4.9
hsa-miR-362-3p	MIMAT0004683	Endogenous1	14.31	1.3	3.72	4.95
hsa-miR-362-5p	MIMAT0000705	Endogenous1	37.33	6.99	15.35	17.15
hsa-miR-363-3p	MIMAT0000707	Endogenous1	53.63	12.86	33.02	66.18
hsa-miR-363-5p	MIMAT0003385	Endogenous1	2.53	4.65	7.82	1.9
hsa-miR-365a-3p+hsa-miR-365b-3p	MIMAT0000710	Endogenous1	127.53	2.58	35.45	71.66
hsa-miR-365b-5p	MIMAT0022833	Endogenous1	6.51	4.33	12.22	5.5
hsa-miR-367-3p	MIMAT0000719	Endogenous1	3.57	3.16	4.88	2.31
hsa-miR-369-3p	MIMAT0000721	Endogenous1	9.83	10.17	5.57	9.51
hsa-miR-369-5p	MIMAT0001621	Endogenous1	1	1.3	1.53	1.9
hsa-miR-3690	MIMAT0018119	Endogenous1	8.13	8.24	9.11	11.12
hsa-miR-370-3p	MIMAT0000722	Endogenous1	9.81	7.94	12.32	16.15
hsa-miR-370-5p	MIMAT0026483	Endogenous1	2.57	8.65	6.29	4.32
hsa-miR-371a-5p	MIMAT0004687	Endogenous1	3.33	1.3	2.24	7.15
hsa-miR-371b-5p	MIMAT0019892	Endogenous1	1.5	3.11	1.78	5.09
hsa-miR-372-3p	MIMAT0000724	Endogenous1	1	1.3	1.12	1.9
hsa-miR-373-3p	MIMAT0000726	Endogenous1	1.94	1.51	1.12	2.9
hsa-miR-374a-3p	MIMAT0004688	Endogenous1	1	2.75	1.29	2.6
hsa-miR-374a-5p	MIMAT0000727	Endogenous1	2369.96	10.53	177.13	1134.73
hsa-miR-374b-5p	MIMAT0004955	Endogenous1	101.9	8.75	30.12	69.47
hsa-miR-374c-5p	MIMAT0018443	Endogenous1	2.91	1.51	5.85	3.55
hsa-miR-375	MIMAT0000728	Endogenous1	4.88	4.39	6.61	9.99
hsa-miR-376a-2-5p	MIMAT0022928	Endogenous1	1.3	2.44	1.38	1.9
hsa-miR-376a-3p	MIMAT0000729	Endogenous1	523.43	22.83	80.12	221.57
hsa-miR-376b-3p	MIMAT0002172	Endogenous1	1	1.3	1.12	1.9
hsa-miR-376c-3p	MIMAT0000720	Endogenous1	145.13	2.13	12.55	39.43
hsa-miR-376c-5p	MIMAT0022861	Endogenous1	1	1.3	1.12	1.9
hsa-miR-377-3p	MIMAT0000730	Endogenous1	97.7	2.64	10.32	30.68
hsa-miR-378b	MIMAT0014999	Endogenous1	1	1.3	1.78	2.9
hsa-miR-378c	MIMAT0016847	Endogenous1	1.33	1.44	1.53	3.15
hsa-miR-378d	MIMAT0018926	Endogenous1	17.13	6.34	10.46	7.13
hsa-miR-378e	MIMAT0018927	Endogenous1	1	1.3	1.12	1.9
hsa-miR-378f	MIMAT0018932	Endogenous1	2.63	9.24	4.22	4.68
hsa-miR-378g	MIMAT0018937	Endogenous1	69.92	8.78	22.71	46.3
hsa-miR-378h	MIMAT0018984	Endogenous1	3.12	2.16	3.86	5.59
hsa-miR-378i	MIMAT0019074	Endogenous1	128.6	5.21	60.86	76.73
hsa-miR-379-5p	MIMAT0000733	Endogenous1	128.54	3.24	13.21	39.05
hsa-miR-380-3p	MIMAT0000735	Endogenous1	1	1.3	1.53	1.9
hsa-miR-381-3p	MIMAT0000736	Endogenous1	29.37	2.16	3.1	12.68
hsa-miR-381-5p	MIMAT0022862	Endogenous1	1	1.95	1.71	1.9
hsa-miR-382-3p	MIMAT0022697	Endogenous1	1.75	2.94	2.03	1.9
hsa-miR-382-5p	MIMAT0000737	Endogenous1	100.76	1.3	12.31	26.17
hsa-miR-383-5p	MIMAT0000738	Endogenous1	1	1.3	1.78	2.21
hsa-miR-384	MIMAT0001075	Endogenous1	1	1.51	3.68	1.9
hsa-miR-3916	MIMAT0018190	Endogenous1	1	1.3	1.88	1.9
hsa-miR-3918	MIMAT0018192	Endogenous1	1.3	1.3	4.8	3.78
hsa-miR-3928-3p	MIMAT0018205	Endogenous1	5.67	2.28	6.79	9.11
hsa-miR-3934-5p	MIMAT0018349	Endogenous1	1.43	2.46	2.29	1.9
hsa-miR-409-3p	MIMAT0001639	Endogenous1	10.13	1.95	3.34	9.17
hsa-miR-409-5p	MIMAT0001638	Endogenous1	1	1.3	1.12	1.9
hsa-miR-410-3p	MIMAT0002171	Endogenous1	2.1	1.73	2.46	1.9
hsa-miR-411-5p	MIMAT0003329	Endogenous1	58.49	1.3	6.45	27.12
hsa-miR-412-3p	MIMAT0002170	Endogenous1	1.95	1.3	1.4	2.02
hsa-miR-421	MIMAT0003339	Endogenous1	13.06	10.38	9.53	11.11
hsa-miR-422a	MIMAT0001339	Endogenous1	1	1.3	1.12	1.9
hsa-miR-423-3p	MIMAT0001340	Endogenous1	10.25	3.82	4.98	16.92
hsa-miR-423-5p	MIMAT0004748	Endogenous1	31.26	2.56	16.51	35.19
hsa-miR-424-5p	MIMAT0001341	Endogenous1	10496.9	8.07	455.99	2475.89
hsa-miR-425-5p	MIMAT0003393	Endogenous1	7.86	2.28	7.79	18.51
hsa-miR-4284	MIMAT0016915	Endogenous1	1.1	3.98	2.18	2.6
hsa-miR-4286	MIMAT0016916	Endogenous1	46.18	7.96	18.94	47.37
hsa-miR-429	MIMAT0001536	Endogenous1	15.32	2.38	12.89	29.82
hsa-miR-431-5p	MIMAT0001625	Endogenous1	1	2.53	3.28	5.82
hsa-miR-432-5p	MIMAT0002814	Endogenous1	3.4	1.44	3.35	4.63
hsa-miR-433-3p	MIMAT0001627	Endogenous1	2.79	1.3	1.67	1.9
hsa-miR-433-5p	MIMAT0026554	Endogenous1	1.75	1.51	5.03	2.21
hsa-miR-4421	MIMAT0018934	Endogenous1	1.86	2	1.99	3.84
hsa-miR-4425	MIMAT0018940	Endogenous1	1.69	1.3	4.91	3.36
hsa-miR-4431	MIMAT0018947	Endogenous1	1	1.3	1.71	1.9
hsa-miR-4435	MIMAT0018951	Endogenous1	1.33	1.73	1.99	1.9
hsa-miR-4443	MIMAT0018961	Endogenous1	18.12	1.95	14.05	37.07
hsa-miR-4448	MIMAT0018967	Endogenous1	1.93	1.3	1.71	1.9
hsa-miR-4451	MIMAT0018973	Endogenous1	1.1	1.8	2.38	2.34
hsa-miR-4454+hsa-miR-7975	MIMAT0018976	Endogenous1	18887.9	1589.95	6396.8	15327.3
hsa-miR-4455	MIMAT0018977	Endogenous1	1.91	1.3	1.12	3.55
hsa-miR-4458	MIMAT0018980	Endogenous1	2.16	1.99	4.34	2.8
hsa-miR-4461	MIMAT0018983	Endogenous1	1.3	1.51	2.6	2.59
hsa-miR-448	MIMAT0001532	Endogenous1	4.54	5.8	2.12	2.21
hsa-miR-4485-3p	MIMAT0019019	Endogenous1	2.35	1.3	2.69	1.9
hsa-miR-4488	MIMAT0019022	Endogenous1	4.93	6.39	10.39	11.54
hsa-miR-449a	MIMAT0001541	Endogenous1	1.63	1.3	2.33	3.36
hsa-miR-449b-5p	MIMAT0003327	Endogenous1	6.18	2.26	4.16	5.25
hsa-miR-449c-5p	MIMAT0010251	Endogenous1	1.75	3.23	3.28	1.9
hsa-miR-450a-1-3p	MIMAT0022700	Endogenous1	5.8	2.64	5.68	2.6
hsa-miR-450a-2-3p	MIMAT0031074	Endogenous1	4.65	7.71	7.65	4.83
hsa-miR-450a-5p	MIMAT0001545	Endogenous1	1000.89	1.3	37.6	445.31
hsa-miR-450b-3p	MIMAT0004910	Endogenous1	2.88	1.99	2.54	4.53
hsa-miR-450b-5p	MIMAT0004909	Endogenous1	31.91	1.78	6.14	27.73
hsa-miR-4516	MIMAT0019053	Endogenous1	5.75	2.31	2.66	13.57
hsa-miR-451a	MIMAT0001631	Endogenous1	10840.8	45.01	1594.85	8894.6
hsa-miR-452-5p	MIMAT0001635	Endogenous1	1	1.3	1.29	1.9
hsa-miR-4521	MIMAT0019058	Endogenous1	5.48	4.22	6.48	6.89
hsa-miR-4524a-5p	MIMAT0019062	Endogenous1	1	1.3	1.12	1.9
hsa-miR-4531	MIMAT0019070	Endogenous1	1.51	1.3	1.88	4.65
hsa-miR-4532	MIMAT0019071	Endogenous1	1.52	2.45	1.12	3.41
hsa-miR-4536-3p	MIMAT0020959	Endogenous1	2.19	1.51	6.31	1.9
hsa-miR-4536-5p	MIMAT0019078	Endogenous1	1.96	1.95	5.06	7.98
hsa-miR-454-3p	MIMAT0003885	Endogenous1	28.02	2.2	5.04	23.02
hsa-miR-455-3p	MIMAT0004784	Endogenous1	3.05	1.3	1.2	1.9
hsa-miR-455-5p	MIMAT0003150	Endogenous1	493.63	9.48	22.15	102.22
hsa-miR-4647	MIMAT0019709	Endogenous1	2.4	3.98	5.94	4.96
hsa-miR-4707-3p	MIMAT0019808	Endogenous1	1.86	2.15	2.61	1.9
hsa-miR-4707-5p	MIMAT0019807	Endogenous1	7.07	4.64	11.76	5.91
hsa-miR-4741	MIMAT0019871	Endogenous1	2.09	2.13	2.1	2.9
hsa-miR-4755-5p	MIMAT0019895	Endogenous1	2.96	1.3	6.22	3.02
hsa-miR-4787-3p	MIMAT0019957	Endogenous1	1	2.07	2.2	1.9
hsa-miR-4787-5p	MIMAT0019956	Endogenous1	3.49	5.83	6.03	14.06
hsa-miR-4792	MIMAT0019964	Endogenous1	1.33	2.44	1.53	1.9
hsa-miR-483-3p	MIMAT0002173	Endogenous1	2.08	2.63	1.29	12.29
hsa-miR-483-5p	MIMAT0004761	Endogenous1	1	1.3	1.12	1.9
hsa-miR-484	MIMAT0002174	Endogenous1	2.6	1.99	4.26	5.08
hsa-miR-485-3p	MIMAT0002176	Endogenous1	8.14	5.13	4.16	4.76
hsa-miR-485-5p	MIMAT0002175	Endogenous1	1.75	2.19	1.53	1.9
hsa-miR-486-3p	MIMAT0004762	Endogenous1	1.46	1.44	1.97	1.9
hsa-miR-487a-3p	MIMAT0002178	Endogenous1	8.8	3.91	2.12	3.6
hsa-miR-487b-3p	MIMAT0003180	Endogenous1	2.22	1.3	1.12	1.9
hsa-miR-487b-5p	MIMAT0026614	Endogenous1	1.74	1.6	3.78	4.66
hsa-miR-488-3p	MIMAT0004763	Endogenous1	1.46	1.78	2.54	5.11
hsa-miR-489-3p	MIMAT0002805	Endogenous1	2.32	1.3	1.12	5.17
hsa-miR-490-3p	MIMAT0002806	Endogenous1	1.1	1.3	1.12	2.31
hsa-miR-490-5p	MIMAT0004764	Endogenous1	1.74	6.56	3.99	1.9
hsa-miR-491-3p	MIMAT0004765	Endogenous1	3.95	4	5.71	2.6
hsa-miR-491-5p	MIMAT0002807	Endogenous1	14.8	5.51	14.47	34.44
hsa-miR-492	MIMAT0002812	Endogenous1	1.2	2.63	4.25	2.35
hsa-miR-493-3p	MIMAT0003161	Endogenous1	16.02	6.67	17.25	14.47
hsa-miR-494-3p	MIMAT0002816	Endogenous1	1	1.3	1.12	1.9
hsa-miR-494-5p	MIMAT0026607	Endogenous1	1	1.3	1.12	1.9
hsa-miR-495-3p	MIMAT0002817	Endogenous1	373.09	8.39	72.46	123.76
hsa-miR-495-5p	MIMAT0022924	Endogenous1	5.65	3.61	4.68	2.21
hsa-miR-496	MIMAT0002818	Endogenous1	1	1.3	1.12	1.9
hsa-miR-497-5p	MIMAT0002820	Endogenous1	276.49	13.06	93.25	73.51
hsa-miR-498	MIMAT0002824	Endogenous1	1	1.3	1.12	1.9
hsa-miR-499a-3p	MIMAT0004772	Endogenous1	4.83	7.77	6.22	4.54
hsa-miR-499a-5p	MIMAT0002870	Endogenous1	9.34	7.7	7.79	8.75
hsa-miR-499b-3p	MIMAT0019898	Endogenous1	1	1.39	1.86	1.9
hsa-miR-499b-5p	MIMAT0019897	Endogenous1	1.3	1.62	2.44	3.2
hsa-miR-5001-3p	MIMAT0021022	Endogenous1	1	1.3	1.12	1.9
hsa-miR-5001-5p	MIMAT0021021	Endogenous1	3.29	1.62	1.2	2.02
hsa-miR-500a-5p+hsa-miR-501-5p	MIMAT0004773	Endogenous1	25.66	1.73	7.16	16.44
hsa-miR-501-3p	MIMAT0004774	Endogenous1	1	1.3	1.12	1.9
hsa-miR-5010-3p	MIMAT0021044	Endogenous1	3.4	4.64	2.85	5.55
hsa-miR-5010-5p	MIMAT0021043	Endogenous1	1	9.19	3.32	3.36
hsa-miR-502-3p	MIMAT0004775	Endogenous1	2.7	6.2	2.46	3.55
hsa-miR-502-5p	MIMAT0002873	Endogenous1	1	1.3	1.12	1.9
hsa-miR-503-3p	MIMAT0022925	Endogenous1	1.5	1.44	1.12	4.32
hsa-miR-503-5p	MIMAT0002874	Endogenous1	178.44	2.69	36.11	132.42
hsa-miR-504-3p	MIMAT0026612	Endogenous1	1.1	4	2.78	1.9
hsa-miR-504-5p	MIMAT0002875	Endogenous1	10.68	3.54	6.83	14.59
hsa-miR-505-3p	MIMAT0002876	Endogenous1	40.69	2.53	10.17	28.49
hsa-miR-506-3p	MIMAT0002878	Endogenous1	13.98	9.39	20.89	27.47
hsa-miR-506-5p	MIMAT0022701	Endogenous1	3.72	2.46	2.03	2.6
hsa-miR-507	MIMAT0002879	Endogenous1	1	4.26	1.29	2.96
hsa-miR-508-3p	MIMAT0002880	Endogenous1	1	1.3	1.12	1.9
hsa-miR-508-5p	MIMAT0004778	Endogenous1	1	1.51	1.12	2.21
hsa-miR-509-3-5p	MIMAT0004975	Endogenous1	1.1	2.31	1.12	1.9
hsa-miR-509-3p	MIMAT0002881	Endogenous1	1	1.3	1.12	3.2
hsa-miR-509-5p	MIMAT0004779	Endogenous1	3.69	12.39	14.69	10.05
hsa-miR-510-3p	MIMAT0026613	Endogenous1	2.19	4.98	3.05	3.56
hsa-miR-510-5p	MIMAT0002882	Endogenous1	1	1.3	1.63	1.9
hsa-miR-511-5p	MIMAT0002808	Endogenous1	1.5	1.84	2.3	3.15
hsa-miR-512-3p	MIMAT0002823	Endogenous1	1	1.3	1.12	1.9
hsa-miR-512-5p	MIMAT0002822	Endogenous1	4.1	5.83	1.71	8.05
hsa-miR-513a-3p	MIMAT0004777	Endogenous1	1.3	1.95	1.53	2.9
hsa-miR-513a-5p	MIMAT0002877	Endogenous1	1	1.3	1.2	2.9
hsa-miR-513b-5p	MIMAT0005788	Endogenous1	7.93	4.51	5.26	5.13
hsa-miR-513c-3p	MIMAT0022728	Endogenous1	1	1.3	1.12	1.9
hsa-miR-513c-5p	MIMAT0005789	Endogenous1	1.6	2.87	4.97	1.9
hsa-miR-514a-3p	MIMAT0002883	Endogenous1	11.85	14.72	14.69	26.9
hsa-miR-514a-5p	MIMAT0022702	Endogenous1	8.52	2.53	12.32	14.5
hsa-miR-514b-3p	MIMAT0015088	Endogenous1	1	3.05	1.6	2.59
hsa-miR-514b-5p	MIMAT0015087	Endogenous1	21.98	11.54	9.79	9.49
hsa-miR-515-3p	MIMAT0002827	Endogenous1	1.93	1.3	1.99	3.36
hsa-miR-515-5p	MIMAT0002826	Endogenous1	7.31	3.96	8.5	3.15
hsa-miR-516a-3p+hsa-miR-516b-3p	MIMAT0006778	Endogenous1	1.63	2.94	1.67	3.88
hsa-miR-516a-5p	MIMAT0004770	Endogenous1	1	1.51	2.55	2.9
hsa-miR-516b-5p	MIMAT0002859	Endogenous1	3.42	8.33	12.31	8.04
hsa-miR-517a-3p	MIMAT0002852	Endogenous1	3.93	2.83	3.48	7.99
hsa-miR-517b-3p	MIMAT0002857	Endogenous1	1	1.3	2.6	1.9
hsa-miR-517c-3p+hsa-miR-519a-3p	MIMAT0002866	Endogenous1	3.47	11.85	10.92	6.85
hsa-miR-518b	MIMAT0002844	Endogenous1	47.99	2.97	12.82	29.43
hsa-miR-518c-3p	MIMAT0002848	Endogenous1	1.5	2.13	3.99	1.9
hsa-miR-518d-3p	MIMAT0002864	Endogenous1	1.6	2.79	7.18	5.58
hsa-miR-518e-3p	MIMAT0002861	Endogenous1	1	1.44	1.61	2.6
hsa-miR-518f-3p	MIMAT0002842	Endogenous1	4.32	3.28	6.01	11.8
hsa-miR-5196-3p+hsa-miR-6732-3p	MIMAT0021129	Endogenous1	9.72	1.3	4.15	15.92
hsa-miR-5196-5p	MIMAT0021128	Endogenous1	2.37	1.78	4.16	1.9
hsa-miR-519b-3p	MIMAT0002837	Endogenous1	5.12	10.34	18.5	11.08
hsa-miR-519b-5p+hsa-miR-519c-5p+hsa-miR-523-5p+hsa-miR-518e-5p+hsa-miR-522-5p+hsa-miR-519a-5p	MIMAT0005454	Endogenous1	1	1.73	2.2	2.9
hsa-miR-519c-3p	MIMAT0002832	Endogenous1	1.72	3.9	1.67	1.9
hsa-miR-519d-3p	MIMAT0002853	Endogenous1	1	1.62	1.12	2.21
hsa-miR-519e-3p	MIMAT0002829	Endogenous1	6.32	7.71	4.8	3.84
hsa-miR-520a-3p	MIMAT0002834	Endogenous1	1	2.28	1.12	1.9
hsa-miR-520a-5p	MIMAT0002833	Endogenous1	6.03	3.78	4.64	6.56
hsa-miR-520b	MIMAT0002843	Endogenous1	1	1.3	1.53	1.9
hsa-miR-520c-3p	MIMAT0002846	Endogenous1	1.55	2.13	2.52	6.06
hsa-miR-520d-3p	MIMAT0002856	Endogenous1	2.48	1.3	2.76	4.16
hsa-miR-520d-5p+hsa-miR-527+hsa-miR-518a-5p	MIMAT0002855	Endogenous1	2.44	1.44	2.12	3.15
hsa-miR-520e	MIMAT0002825	Endogenous1	1.1	1.3	1.12	2.21
hsa-miR-520f-3p	MIMAT0002830	Endogenous1	1	1.3	2.29	1.9
hsa-miR-520g-3p	MIMAT0002858	Endogenous1	1.1	2.41	1.29	2.98
hsa-miR-520h	MIMAT0002867	Endogenous1	3.18	2.92	2.86	2.9
hsa-miR-521	MIMAT0002854	Endogenous1	1	1.99	1.53	2.21
hsa-miR-522-3p	MIMAT0002868	Endogenous1	1.28	1.73	5.9	12.21
hsa-miR-523-3p	MIMAT0002840	Endogenous1	1.3	2.75	2.54	2.21
hsa-miR-524-3p	MIMAT0002850	Endogenous1	2.01	4.49	3.55	2.8
hsa-miR-525-3p	MIMAT0002839	Endogenous1	7.13	6.45	3.17	4.59
hsa-miR-525-5p	MIMAT0002838	Endogenous1	8.19	7.94	8.26	8.82
hsa-miR-526a+hsa-miR-518c-5p+hsa-miR-518d-5p	MIMAT0002845	Endogenous1	14.13	19.65	17.4	26.07
hsa-miR-526b-5p	MIMAT0002835	Endogenous1	1.75	2.15	7.05	4.74
hsa-miR-532-3p	MIMAT0004780	Endogenous1	8.17	7.89	11.95	4.18
hsa-miR-532-5p	MIMAT0002888	Endogenous1	15.73	5.8	11.51	8.72
hsa-miR-539-3p	MIMAT0022705	Endogenous1	1.58	1.3	1.86	1.9
hsa-miR-539-5p	MIMAT0003163	Endogenous1	5.65	6.06	14.32	14.87
hsa-miR-541-3p	MIMAT0004920	Endogenous1	1	1.3	1.12	1.9
hsa-miR-542-3p	MIMAT0003389	Endogenous1	14.37	5.87	13.17	16.09
hsa-miR-542-5p	MIMAT0003340	Endogenous1	10.7	1.3	2.76	5.16
hsa-miR-543	MIMAT0004954	Endogenous1	113.58	11.58	27.33	72.08
hsa-miR-544a	MIMAT0003164	Endogenous1	1.5	1.44	2.24	1.9
hsa-miR-545-3p	MIMAT0003165	Endogenous1	10.23	2.41	6.35	7.06
hsa-miR-548a-3p	MIMAT0003251	Endogenous1	1	1.3	1.12	1.9
hsa-miR-548a-5p	MIMAT0004803	Endogenous1	6.78	7.76	5.63	6.78
hsa-miR-548aa+hsa-miR-548t-3p	MIMAT0018447	Endogenous1	1	1.3	1.12	1.9
hsa-miR-548ad-3p	MIMAT0018946	Endogenous1	1	1.53	2.92	1.9
hsa-miR-548ah-5p	MIMAT0018972	Endogenous1	6.15	5.47	7.9	12.06
hsa-miR-548ai+hsa-miR-570-5p	MIMAT0018989	Endogenous1	1.1	1.3	1.12	1.9
hsa-miR-548ak	MIMAT0019013	Endogenous1	1	2.56	3.13	2.6
hsa-miR-548al	MIMAT0019024	Endogenous1	6.84	5.92	8.88	6.39
hsa-miR-548ar-3p	MIMAT0022266	Endogenous1	2.16	4.83	5.61	7.62
hsa-miR-548ar-5p	MIMAT0022265	Endogenous1	1	1.3	1.39	1.9
hsa-miR-548b-3p	MIMAT0003254	Endogenous1	1	1.3	1.12	1.9
hsa-miR-548c-5p+hsa-miR-548o-5p+hsa-miR-548am-5p	MIMAT0004806	Endogenous1	1	1.3	1.12	1.9
hsa-miR-548d-3p	MIMAT0003323	Endogenous1	1	1.3	1.12	1.9
hsa-miR-548d-5p	MIMAT0004812	Endogenous1	13.8	5.89	7.85	11.21
hsa-miR-548e-3p	MIMAT0005874	Endogenous1	1	1.3	1.53	1.9
hsa-miR-548e-5p	MIMAT0026736	Endogenous1	9.77	22.57	21.3	30.06
hsa-miR-548g-3p	MIMAT0005912	Endogenous1	2.27	8.55	10.71	3.41
hsa-miR-548h-5p	MIMAT0005928	Endogenous1	1	1.3	1.12	1.9
hsa-miR-548i	MIMAT0005935	Endogenous1	1.42	1.3	1.39	2.21
hsa-miR-548j-3p	MIMAT0026737	Endogenous1	4.62	10.73	14.8	7.23
hsa-miR-548j-5p	MIMAT0005875	Endogenous1	1	1.44	2.3	2.9
hsa-miR-548k	MIMAT0005882	Endogenous1	4.75	7.33	11.12	13.17
hsa-miR-548l	MIMAT0005889	Endogenous1	1.46	1.99	3.28	2.6
hsa-miR-548m	MIMAT0005917	Endogenous1	14.11	9.39	14.83	24.96
hsa-miR-548n	MIMAT0005916	Endogenous1	8.81	5.38	9.85	1.9
hsa-miR-548o-3p+hsa-miR-548ah-3p+hsa-miR-548av-3p	MIMAT0005919	Endogenous1	3.87	4.97	13.74	4.52
hsa-miR-548q	MIMAT0011163	Endogenous1	1	1.3	1.12	1.9
hsa-miR-548v	MIMAT0015020	Endogenous1	1.91	2.07	3.52	1.9
hsa-miR-548y	MIMAT0018354	Endogenous1	7.5	8.17	10.93	7.69
hsa-miR-548z+hsa-miR-548h-3p	MIMAT0018446	Endogenous1	1.33	3.64	13.27	7.64
hsa-miR-549a	MIMAT0003333	Endogenous1	1	1.3	1.71	1.9
hsa-miR-550a-5p	MIMAT0004800	Endogenous1	1	1.3	1.12	1.9
hsa-miR-551a	MIMAT0003214	Endogenous1	2.92	1.3	6.84	7.46
hsa-miR-551b-3p	MIMAT0003233	Endogenous1	6.93	5.21	18.07	19.24
hsa-miR-552-3p	MIMAT0003215	Endogenous1	1.87	4.77	2.52	9.21
hsa-miR-553	MIMAT0003216	Endogenous1	1	2.28	3.91	1.9
hsa-miR-554	MIMAT0003217	Endogenous1	1	1.3	1.12	1.9
hsa-miR-555	MIMAT0003219	Endogenous1	1	1.3	2.29	3.55
hsa-miR-556-3p	MIMAT0004793	Endogenous1	1.63	6.63	2.74	1.9
hsa-miR-556-5p	MIMAT0003220	Endogenous1	1	1.3	1.12	1.9
hsa-miR-561-3p	MIMAT0003225	Endogenous1	1.65	2.64	2.61	3.35
hsa-miR-561-5p	MIMAT0022706	Endogenous1	3.07	1.39	5.46	2.69
hsa-miR-562	MIMAT0003226	Endogenous1	1	2.41	1.71	2.21
hsa-miR-563	MIMAT0003227	Endogenous1	5.52	9.71	5.1	10.93
hsa-miR-564	MIMAT0003228	Endogenous1	4.25	2.44	3.39	5.24
hsa-miR-566	MIMAT0003230	Endogenous1	2.36	2	4.94	4.32
hsa-miR-567	MIMAT0003231	Endogenous1	1.95	6.47	5.58	1.9
hsa-miR-568	MIMAT0003232	Endogenous1	1.75	3.46	6	3.96
hsa-miR-570-3p	MIMAT0003235	Endogenous1	1	1.3	1.12	1.9
hsa-miR-571	MIMAT0003236	Endogenous1	1	1.3	1.12	1.9
hsa-miR-572	MIMAT0003237	Endogenous1	3.67	2.16	2.2	1.9
hsa-miR-573	MIMAT0003238	Endogenous1	1	1.3	1.99	1.9
hsa-miR-574-3p	MIMAT0003239	Endogenous1	93.23	4.09	17.19	40.29
hsa-miR-574-5p	MIMAT0004795	Endogenous1	57.79	4.51	19.45	31.9
hsa-miR-575	MIMAT0003240	Endogenous1	9.54	9.22	19.34	12.35
hsa-miR-576-3p	MIMAT0004796	Endogenous1	1	1.73	1.39	2.21
hsa-miR-576-5p	MIMAT0003241	Endogenous1	3.1	3.76	5.54	4.71
hsa-miR-577	MIMAT0003242	Endogenous1	4.39	1.51	3.11	9.93
hsa-miR-578	MIMAT0003243	Endogenous1	4.96	2.75	5.52	4.81
hsa-miR-579-3p	MIMAT0003244	Endogenous1	1	1.3	1.12	1.9
hsa-miR-579-5p	MIMAT0026616	Endogenous1	4.16	2.82	1.84	1.9
hsa-miR-580-3p	MIMAT0003245	Endogenous1	1.17	1.73	4.25	1.9
hsa-miR-582-3p	MIMAT0004797	Endogenous1	3.68	1.8	2.24	8.56
hsa-miR-582-5p	MIMAT0003247	Endogenous1	18.82	15.17	20.57	37.65
hsa-miR-584-3p	MIMAT0022708	Endogenous1	13.48	14.1	15.61	15.12
hsa-miR-584-5p	MIMAT0003249	Endogenous1	2.25	4.77	4.59	3.56
hsa-miR-585-3p	MIMAT0003250	Endogenous1	5.12	8.09	4.49	5.09
hsa-miR-587	MIMAT0003253	Endogenous1	4.7	1.3	2.29	2.31
hsa-miR-589-5p	MIMAT0004799	Endogenous1	3.14	2.16	1.12	2.21
hsa-miR-590-3p	MIMAT0004801	Endogenous1	1	1.3	1.12	2.9
hsa-miR-590-5p	MIMAT0003258	Endogenous1	9.28	1.44	3.03	18.69
hsa-miR-591	MIMAT0003259	Endogenous1	3.05	3.23	2.1	3.21
hsa-miR-592	MIMAT0003260	Endogenous1	8.54	2.16	6.99	10.04
hsa-miR-593-3p	MIMAT0004802	Endogenous1	13.3	2.59	8.06	25.71
hsa-miR-595	MIMAT0003263	Endogenous1	1.1	3.09	3.98	2.9
hsa-miR-596	MIMAT0003264	Endogenous1	3.17	3.31	6.85	6.74
hsa-miR-597-5p	MIMAT0003265	Endogenous1	1.96	8.72	3.64	11.1
hsa-miR-598-3p	MIMAT0003266	Endogenous1	19.9	6.23	9.34	11.94
hsa-miR-599	MIMAT0003267	Endogenous1	1	1.3	1.12	1.9
hsa-miR-600	MIMAT0003268	Endogenous1	1	1.39	1.77	1.9
hsa-miR-601	MIMAT0003269	Endogenous1	1	1.3	1.99	1.9
hsa-miR-603	MIMAT0003271	Endogenous1	1	1.3	1.12	1.9
hsa-miR-604	MIMAT0003272	Endogenous1	1	1.3	1.12	1.9
hsa-miR-605-5p	MIMAT0003273	Endogenous1	1.3	2.19	1.99	2.21
hsa-miR-606	MIMAT0003274	Endogenous1	1.17	2.36	3.54	1.9
hsa-miR-607	MIMAT0003275	Endogenous1	8.84	10.2	12.28	17.2
hsa-miR-608	MIMAT0003276	Endogenous1	14.18	11.76	16.55	5.38
hsa-miR-610	MIMAT0003278	Endogenous1	3.05	2.75	3.62	4.97
hsa-miR-612	MIMAT0003280	Endogenous1	21.03	32.24	32.65	48.17
hsa-miR-613	MIMAT0003281	Endogenous1	1.63	3.29	1.53	1.9
hsa-miR-614	MIMAT0003282	Endogenous1	1	1.44	2.03	2.21
hsa-miR-615-3p	MIMAT0003283	Endogenous1	1	2.66	1.86	2.34
hsa-miR-615-5p	MIMAT0004804	Endogenous1	2.38	2.66	2.86	1.9
hsa-miR-616-3p	MIMAT0004805	Endogenous1	1.1	1.3	1.38	3.41
hsa-miR-617	MIMAT0003286	Endogenous1	1.86	1.3	3.12	2.68
hsa-miR-619-3p	MIMAT0003288	Endogenous1	1.85	2.41	1.89	1.9
hsa-miR-620	MIMAT0003289	Endogenous1	1	1.95	1.12	1.9
hsa-miR-624-3p	MIMAT0004807	Endogenous1	1.42	1.66	1.29	2.9
hsa-miR-625-5p	MIMAT0003294	Endogenous1	3.41	1.95	3.76	2.6
hsa-miR-626	MIMAT0003295	Endogenous1	6.74	1.95	8.63	5.04
hsa-miR-627-3p	MIMAT0026623	Endogenous1	9.14	14.3	10.57	7.84
hsa-miR-627-5p	MIMAT0003296	Endogenous1	1	1.3	1.12	1.9
hsa-miR-628-3p	MIMAT0003297	Endogenous1	2.17	1.95	3.68	4.53
hsa-miR-628-5p	MIMAT0004809	Endogenous1	18.01	1.99	3.01	18.67
hsa-miR-629-5p	MIMAT0004810	Endogenous1	1.75	6.98	10.23	7.49
hsa-miR-630	MIMAT0003299	Endogenous1	1	2.3	2.1	3.36
hsa-miR-631	MIMAT0003300	Endogenous1	1	2.28	2.55	1.9
hsa-miR-637	MIMAT0003307	Endogenous1	1	1.3	1.12	1.9
hsa-miR-638	MIMAT0003308	Endogenous1	1	1.3	2.24	1.9
hsa-miR-639	MIMAT0003309	Endogenous1	1.33	4.27	2.27	7.84
hsa-miR-640	MIMAT0003310	Endogenous1	4.28	2.45	3.46	3.41
hsa-miR-641	MIMAT0003311	Endogenous1	1	1.3	1.12	1.9
hsa-miR-642a-3p	MIMAT0020924	Endogenous1	1	1.3	1.12	3.15
hsa-miR-642a-5p	MIMAT0003312	Endogenous1	15.55	5.27	9.63	14.69
hsa-miR-643	MIMAT0003313	Endogenous1	1	1.39	1.12	1.9
hsa-miR-644a	MIMAT0003314	Endogenous1	2.53	3.15	2.33	2.21
hsa-miR-648	MIMAT0003318	Endogenous1	1	1.73	2.54	2.59
hsa-miR-649	MIMAT0003319	Endogenous1	1.5	2.53	3.24	1.9
hsa-miR-650	MIMAT0003320	Endogenous1	2.75	3.39	4.66	3.73
hsa-miR-6503-3p	MIMAT0025463	Endogenous1	3.05	2.86	4.24	2.02
hsa-miR-6503-5p	MIMAT0025462	Endogenous1	4.51	6.45	13.72	4.08
hsa-miR-651-3p	MIMAT0026624	Endogenous1	1	1.51	1.12	1.9
hsa-miR-651-5p	MIMAT0003321	Endogenous1	9.48	5.42	4.23	5.99
hsa-miR-6511a-3p	MIMAT0025479	Endogenous1	2.89	1.78	1.12	1.9
hsa-miR-6511a-5p	MIMAT0025478	Endogenous1	1	1.3	1.53	1.9
hsa-miR-652-3p	MIMAT0003322	Endogenous1	1	1.3	1.39	2.6
hsa-miR-652-5p	MIMAT0022709	Endogenous1	1	1.3	1.12	1.9
hsa-miR-654-3p	MIMAT0004814	Endogenous1	2.05	2.69	3.08	2.21
hsa-miR-654-5p	MIMAT0003330	Endogenous1	1.79	1.3	1.53	2.21
hsa-miR-655-3p	MIMAT0003331	Endogenous1	1.17	1.89	2.2	3.36
hsa-miR-656-3p	MIMAT0003332	Endogenous1	15.3	2.54	5.91	11.35
hsa-miR-660-3p	MIMAT0022711	Endogenous1	5.75	2.87	6.56	5.29
hsa-miR-660-5p	MIMAT0003338	Endogenous1	43.57	1.73	7.5	27.59
hsa-miR-661	MIMAT0003324	Endogenous1	2.25	5.87	2.38	4.1
hsa-miR-663a	MIMAT0003326	Endogenous1	1	2.66	1.12	1.9
hsa-miR-664a-3p	MIMAT0005949	Endogenous1	46.26	9.99	25.96	52.92
hsa-miR-664b-3p	MIMAT0022272	Endogenous1	1.5	2.31	3.5	5.02
hsa-miR-664b-5p	MIMAT0022271	Endogenous1	1	1.3	1.12	1.9
hsa-miR-665	MIMAT0004952	Endogenous1	2.23	4.03	2.1	2.02
hsa-miR-671-3p	MIMAT0004819	Endogenous1	1.1	1.44	1.78	2.21
hsa-miR-671-5p	MIMAT0003880	Endogenous1	2.41	9.83	3.13	2.9
hsa-miR-6720-3p	MIMAT0025851	Endogenous1	1	1.73	2.3	1.9
hsa-miR-6721-5p	MIMAT0025852	Endogenous1	8.84	7.49	11.82	15.81
hsa-miR-6724-5p	MIMAT0025856	Endogenous1	5.2	7.46	7.24	14.98
hsa-miR-675-5p	MIMAT0004284	Endogenous1	1	1.3	1.12	2.21
hsa-miR-7-5p	MIMAT0000252	Endogenous1	17.02	1.3	7.02	10.01
hsa-miR-708-5p	MIMAT0004926	Endogenous1	1	1.3	1.12	1.9
hsa-miR-744-5p	MIMAT0004945	Endogenous1	1.63	2.93	2.1	1.9
hsa-miR-758-3p+hsa-miR-411-3p	MIMAT0003879	Endogenous1	4.26	1.3	3.17	6.07
hsa-miR-758-5p	MIMAT0022929	Endogenous1	1	1.44	1.86	3.57
hsa-miR-760	MIMAT0004957	Endogenous1	1	2.16	3.62	2.96
hsa-miR-761	MIMAT0010364	Endogenous1	1.63	2.64	1.12	4.53
hsa-miR-764	MIMAT0010367	Endogenous1	1.98	11.53	11.13	8.34
hsa-miR-765	MIMAT0003945	Endogenous1	4.83	4.33	2.38	2.21
hsa-miR-766-3p	MIMAT0003888	Endogenous1	1	1.3	1.12	1.9
hsa-miR-766-5p	MIMAT0022714	Endogenous1	1	1.3	1.12	1.9
hsa-miR-767-3p	MIMAT0003883	Endogenous1	1.55	1.44	2.61	1.9
hsa-miR-767-5p	MIMAT0003882	Endogenous1	2.54	6.18	2.6	3.96
hsa-miR-769-3p	MIMAT0003887	Endogenous1	1.3	2.83	2.1	2.02
hsa-miR-769-5p	MIMAT0003886	Endogenous1	21.4	4.59	14.44	24.77
hsa-miR-770-5p	MIMAT0003948	Endogenous1	1	2.66	1.12	1.9
hsa-miR-802	MIMAT0004185	Endogenous1	6.29	7.13	7.91	5.06
hsa-miR-873-3p	MIMAT0022717	Endogenous1	13.61	4.84	21.26	6.24
hsa-miR-873-5p	MIMAT0004953	Endogenous1	1.1	1.44	1.39	1.9
hsa-miR-874-3p	MIMAT0004911	Endogenous1	1	1.3	1.12	1.9
hsa-miR-874-5p	MIMAT0026718	Endogenous1	13.33	5.71	5.7	14.32
hsa-miR-875-3p	MIMAT0004923	Endogenous1	1	1.73	1.12	1.9
hsa-miR-876-3p	MIMAT0004925	Endogenous1	2.27	2.75	2.2	2.8
hsa-miR-876-5p	MIMAT0004924	Endogenous1	1	1.3	1.12	1.9
hsa-miR-877-5p	MIMAT0004949	Endogenous1	3.34	1.3	1.71	3.45
hsa-miR-885-3p	MIMAT0004948	Endogenous1	1	1.73	1.71	4.1
hsa-miR-885-5p	MIMAT0004947	Endogenous1	1	1.3	1.12	1.9
hsa-miR-887-3p	MIMAT0004951	Endogenous1	1.91	5.75	2.92	2.9
hsa-miR-887-5p	MIMAT0026720	Endogenous1	1.75	3.05	3.28	3.99
hsa-miR-888-5p	MIMAT0004916	Endogenous1	13.95	14.5	21.68	30.08
hsa-miR-889-3p	MIMAT0004921	Endogenous1	12.27	1.79	2.46	13.31
hsa-miR-890	MIMAT0004912	Endogenous1	3.08	6.44	8.08	2.9
hsa-miR-891a-5p	MIMAT0004902	Endogenous1	9.99	12.18	7.91	18.34
hsa-miR-891b	MIMAT0004913	Endogenous1	4.2	2.07	3.7	15.82
hsa-miR-892a	MIMAT0004907	Endogenous1	3.36	4.7	11.27	4.56
hsa-miR-892b	MIMAT0004918	Endogenous1	1	1.3	1.12	1.9
hsa-miR-9-5p	MIMAT0000441	Endogenous1	225.77	1.3	25.06	39.68
hsa-miR-922	MIMAT0004972	Endogenous1	2.74	11.8	7.21	3.43
hsa-miR-924	MIMAT0004974	Endogenous1	1	1.3	1.12	1.9
hsa-miR-92a-1-5p	MIMAT0004507	Endogenous1	1.33	1.3	1.12	1.9
hsa-miR-92a-3p	MIMAT0000092	Endogenous1	17.3	2.44	13.34	13
hsa-miR-92b-3p	MIMAT0003218	Endogenous1	4.42	2.31	2.33	2.68
hsa-miR-93-5p	MIMAT0000093	Endogenous1	235.4	9.44	76.71	225.18
hsa-miR-933	MIMAT0004976	Endogenous1	4.21	4.51	8.06	1.9
hsa-miR-934	MIMAT0004977	Endogenous1	1	1.8	2.38	4.16
hsa-miR-935	MIMAT0004978	Endogenous1	3.27	3.17	2.68	2.02
hsa-miR-936	MIMAT0004979	Endogenous1	5.89	12.18	8.31	8.68
hsa-miR-937-3p	MIMAT0004980	Endogenous1	2.64	2.66	2.55	2.98
hsa-miR-939-5p	MIMAT0004982	Endogenous1	2.19	3.54	2.29	4.28
hsa-miR-940	MIMAT0004983	Endogenous1	1	1.3	1.71	1.9
hsa-miR-941	MIMAT0004984	Endogenous1	1.87	1.3	1.61	1.9
hsa-miR-942-3p	MIMAT0026734	Endogenous1	1	2.46	2.54	1.9
hsa-miR-942-5p	MIMAT0004985	Endogenous1	2.25	2.39	2.44	3.84
hsa-miR-944	MIMAT0004987	Endogenous1	1.63	1.3	1.12	1.9
hsa-miR-95-3p	MIMAT0000094	Endogenous1	30.48	5.39	27.75	33.66
hsa-miR-96-5p	MIMAT0000095	Endogenous1	13.21	6.86	6.46	26.17
hsa-miR-98-3p	MIMAT0022842	Endogenous1	1	5.18	5.83	1.9
hsa-miR-98-5p	MIMAT0000096	Endogenous1	602.79	1.51	51.42	230.98
hsa-miR-99a-5p	MIMAT0000097	Endogenous1	4171.36	26.53	540.18	954.93
hsa-miR-99b-5p	MIMAT0000689	Endogenous1	257.53	19.47	81.87	180.86
ACTB	NM_001101.2	Housekeeping	2972	3214.79	2640.58	2630.67
B2M	NM_004048.2	Housekeeping	12871.9	8750.16	10256.4	12456.6
GAPDH	NM_002046.3	Housekeeping	2377.44	2620.14	2985.66	2918.47
RPL19	NM_000981.3	Housekeeping	4924.92	4950.38	4520.04	4224.89
RPLP0	NM_001002.3	Housekeeping	2843.97	3491.34	3485.36	3152.72
LIG_NEG_A	nmiR00810.1	Ligation	2.19	5.56	3.79	5.26
LIG_NEG_B	nmiR00828.1	Ligation	3.01	12.16	8.31	5.5
LIG_NEG_C	nmiR00803.1	Ligation	1	1.3	1.12	1.9
LIG_POS_A	nmiR00813.1	Ligation	6497.64	1741.31	6059.58	5414.61
LIG_POS_B	nmiR00809.1	Ligation	1378.71	410	1309.44	1113.3
LIG_POS_C	nmiR00811.1	Ligation	266.96	68.09	322.76	174.63
NEG_A	ERCC_00096.1	Negative	2.02	1.94	1.77	3.07
NEG_B	ERCC_00041.1	Negative	1.16	1.1	1.81	1.21
NEG_C	ERCC_00019.1	Negative	11.53	6.82	9.63	10.03
NEG_D	ERCC_00076.1	Negative	1.37	1	1.24	1.16
NEG_E	ERCC_00098.1	Negative	6.03	4.09	3.01	5.5
NEG_F	ERCC_00126.1	Negative	8.66	6.9	6.18	6.61
NEG_G	ERCC_00144.1	Negative	1	1	1	1
NEG_H	ERCC_00154.1	Negative	1.16	1.66	2.05	1.21
POS_A	ERCC_00117.1	Positive	22980.8	25343.9	25454.8	29471.5
POS_B	ERCC_00112.1	Positive	8539.17	9070.34	9545.21	10232
POS_C	ERCC_00002.1	Positive	2155.48	2240.54	2356.55	2515.55
POS_D	ERCC_00092.1	Positive	377.46	391.57	375.35	469.41
POS_E	ERCC_00035.1	Positive	65.29	74.71	72.57	71.25
POS_F	ERCC_00034.1	Positive	38.32	57.48	55.55	67.08
ath-miR159a	MIMAT0000177	SpikeIn	1	2.11	2.95	2.6
cel-miR-248	MIMAT0000304	SpikeIn	1	3.45	1.12	1.9
cel-miR-254	MIMAT0000310	SpikeIn	6.18	8.39	8.96	6.98
osa-miR414	MIMAT0001330	SpikeIn	7.7	11.9	7.43	5.74
osa-miR442	MIMAT0001605	SpikeIn	21.39	5.08	10.64	19.55

## Sheet: S1. foldchange
Gene Name	Class Name	HPV+C+ vs. HPV-C-	P value of: HPV+C+ vs. HPV-C-	HPV+C- vs. HPV-C-	P value of: HPV+C- vs. HPV-C-	HPV-C+ vs. HPV-C-	P value of: HPV-C+ vs. HPV-C-
hsa-let-7a-5p	Endogenous1	2.07	0.687403	-1179.15	0.0380047	-16.73	0.406664
hsa-let-7b-5p	Endogenous1	1.53	0.813236	-20.8	0.181658	-2.98	0.588602
hsa-let-7c-5p	Endogenous1	4.06	0.503396	-32.83	0.170287	-1.58	0.837605
hsa-let-7d-5p	Endogenous1	2.16	0.698231	-31.81	0.168136	-2.57	0.669486
hsa-let-7e-5p	Endogenous1	1.81	0.78914	-37	0.197986	-4.81	0.544476
hsa-let-7f-5p	Endogenous1	2.58	0.657642	-93.96	0.127237	-4.24	0.580646
hsa-let-7g-5p	Endogenous1	2.11	0.701631	-433.13	0.0594699	-6.11	0.46837
hsa-let-7i-5p	Endogenous1	3.18	0.621007	-123.91	0.123495	-2.18	0.770694
hsa-miR-1-3p	Endogenous1	11.83	0.164493	1.64	0.729519	1.25	0.891152
hsa-miR-1-5p	Endogenous1	-1.89	0.211134	-1.46	0.440221	-1.69	0.271714
hsa-miR-100-5p	Endogenous1	7.32	0.499077	-29.3	0.296854	-1.09	0.975479
hsa-miR-101-3p	Endogenous1	-1.89	0.211134	-1.46	0.440221	-1.69	0.271714
hsa-miR-103a-3p	Endogenous1	-1.89	0.211134	1.05	0.932489	-1.36	0.534826
hsa-miR-105-5p	Endogenous1	-1.8	0.685076	-2.52	0.517429	-1.73	0.701906
hsa-miR-106a-5p+hsa-miR-17-5p	Endogenous1	1.63	0.779386	-38.76	0.130407	-4.23	0.492822
hsa-miR-106b-5p	Endogenous1	1.49	0.840948	-21.62	0.218063	-3.07	0.62498
hsa-miR-107	Endogenous1	1.13	0.93145	-8.14	0.229513	-2.43	0.579546
hsa-miR-10a-5p	Endogenous1	1.96	0.817703	-22.4	0.345284	-4.49	0.664788
hsa-miR-10b-5p	Endogenous1	2.11	0.714736	-21.54	0.220751	-2.01	0.743333
hsa-miR-1178-3p	Endogenous1	-1.89	0.211134	-1.46	0.440221	-1.47	0.392599
hsa-miR-1180-3p	Endogenous1	-1.44	0.810695	-8.31	0.233373	-3.5	0.469813
hsa-miR-1183	Endogenous1	2.59	0.424703	-1.75	0.693868	1.2	0.884177
hsa-miR-1185-1-3p	Endogenous1	-1.89	0.211134	-1.46	0.440221	-1.69	0.271714
hsa-miR-1185-2-3p	Endogenous1	-1.9	0.59226	-1.95	0.499286	-1.45	0.726575
hsa-miR-1185-5p	Endogenous1	-1.67	0.730087	-2.91	0.448221	-1.28	0.851499
hsa-miR-1193	Endogenous1	1.07	0.939921	-2.12	0.33404	-1.35	0.729249
hsa-miR-1197	Endogenous1	-1.63	0.347101	1.39	0.509545	-1.13	0.895248
hsa-miR-1200	Endogenous1	-2.59	0.271818	-2	0.395509	2.1	0.525717
hsa-miR-1202	Endogenous1	-1.25	0.695044	-1.46	0.440221	-1.69	0.271714
hsa-miR-1203	Endogenous1	-2.05	0.446086	-1.31	0.74943	1.25	0.855563
hsa-miR-1204	Endogenous1	1.22	0.778143	-1.01	0.99591	1.33	0.74063
hsa-miR-1205	Endogenous1	-2.59	0.271818	-2	0.395509	-2.31	0.315885
hsa-miR-1206	Endogenous1	-2.04	0.525166	-3.32	0.31052	-3.86	0.270458
hsa-miR-122-5p	Endogenous1	-1.89	0.211134	-1.46	0.440221	1.49	0.702328
hsa-miR-1224-3p	Endogenous1	-3.35	0.303489	-2.58	0.396183	-2.61	0.389985
hsa-miR-1224-5p	Endogenous1	-1.89	0.211134	-1.32	0.606758	1.01	0.991826
hsa-miR-1226-3p	Endogenous1	-2	0.395035	-2	0.395509	-2.31	0.315885
hsa-miR-1228-3p	Endogenous1	-2.51	0.434399	-2.05	0.54962	-1.68	0.66128
hsa-miR-1233-3p	Endogenous1	1.95	0.516771	-2.55	0.297929	-2.19	0.368303
hsa-miR-1234-3p	Endogenous1	1.36	0.775975	-1.62	0.694878	-1.05	0.961135
hsa-miR-1236-3p	Endogenous1	1.24	0.837945	-1.33	0.788503	1.23	0.841719
hsa-miR-124-3p	Endogenous1	-1.89	0.211134	-1.06	0.904976	1.57	0.698008
hsa-miR-1244	Endogenous1	1.31	0.826529	-1.18	0.910982	3.1	0.367744
hsa-miR-1245a	Endogenous1	-1.65	0.0964637	-2.02	0.0736956	-2.17	0.0237762
hsa-miR-1245b-3p	Endogenous1	-1.27	0.680725	1.27	0.816784	3.68	0.0668018
hsa-miR-1245b-5p	Endogenous1	-1.73	0.255918	-1.1	0.894421	-1.24	0.667666
hsa-miR-1246	Endogenous1	2.46	0.620061	-1.46	0.440221	-1.69	0.271714
hsa-miR-1247-5p	Endogenous1	4.52	0.426058	-6.7	0.311213	-2.55	0.627155
hsa-miR-1248	Endogenous1	-1.71	0.389815	1.6	0.622123	1.05	0.919941
hsa-miR-1249-3p	Endogenous1	1.09	0.872646	1.2	0.685339	1.9	0.467054
hsa-miR-1249-5p	Endogenous1	-2.2	0.243402	-1.69	0.404084	-1.96	0.294861
hsa-miR-1250-5p	Endogenous1	-1.89	0.211134	-1.46	0.440221	-1.69	0.271714
hsa-miR-1252-5p	Endogenous1	-1.35	0.684566	-1.69	0.404084	-1.96	0.294861
hsa-miR-1253	Endogenous1	-1.89	0.211134	-1.46	0.440221	-1.69	0.271714
hsa-miR-1254	Endogenous1	-1.62	0.302181	-1.46	0.440221	-1.69	0.271714
hsa-miR-1255a	Endogenous1	3.98	0.131074	3.19	0.168157	2.5	0.372328
hsa-miR-1255b-5p	Endogenous1	-2.01	0.142979	-1.55	0.329432	-1.02	0.982729
hsa-miR-1257	Endogenous1	-6.5	0.101308	-5.73	0.052764	-3.48	0.196113
hsa-miR-1258	Endogenous1	-1.35	0.821889	1.01	0.994287	-2.99	0.435795
hsa-miR-125a-3p	Endogenous1	1.04	0.976171	-1.35	0.815236	1.24	0.851023
hsa-miR-125a-5p	Endogenous1	2.26	0.780876	-17.04	0.382609	-1.68	0.861092
hsa-miR-125b-5p	Endogenous1	4.55	0.575132	-16.78	0.339658	1.18	0.949611
hsa-miR-126-3p	Endogenous1	1.62	0.79878	-114.91	0.0895349	-6.97	0.426447
hsa-miR-1260a	Endogenous1	1.88	0.784829	-11.74	0.344047	-1.05	0.984545
hsa-miR-1260b	Endogenous1	-1.22	0.892582	-2.03	0.65229	-2.84	0.475893
hsa-miR-1261	Endogenous1	-2.35	0.011011	-1.6	0.179365	-1.7	0.225707
hsa-miR-1262	Endogenous1	1.35	0.704921	1.59	0.450779	1.11	0.885948
hsa-miR-1264	Endogenous1	-3.05	0.446381	1.69	0.700753	1.82	0.647222
hsa-miR-1266-5p	Endogenous1	-4.45	0.00463037	-2.29	0.334165	-2.41	0.219639
hsa-miR-1268a	Endogenous1	-1.89	0.211134	-1.46	0.440221	-1.69	0.271714
hsa-miR-1268b	Endogenous1	1.03	0.913004	2.07	0.119329	-1.12	0.904251
hsa-miR-1269a	Endogenous1	-1.02	0.982802	-2.42	0.395499	-2.06	0.477385
hsa-miR-1269b	Endogenous1	-1.89	0.211134	1.4	0.669353	-1.47	0.392599
hsa-miR-127-3p	Endogenous1	4.11	0.473181	-11.78	0.258884	-1.29	0.896862
hsa-miR-127-5p	Endogenous1	-1.36	0.756849	1.74	0.60887	1.42	0.740298
hsa-miR-1270	Endogenous1	-1.85	0.411384	-2.11	0.325645	2.21	0.218221
hsa-miR-1271-3p	Endogenous1	-1.89	0.211134	-1.46	0.440221	-1.69	0.271714
hsa-miR-1271-5p	Endogenous1	-5.66	0.198858	-4.36	0.244908	-2.71	0.425553
hsa-miR-1272	Endogenous1	-1.76	0.570403	-2.77	0.122976	-3.42	0.0978039
hsa-miR-1273c	Endogenous1	-1.12	0.863711	1.05	0.932489	-1.02	0.974015
hsa-miR-1275	Endogenous1	-1.89	0.211134	-1.46	0.440221	-1.69	0.271714
hsa-miR-1276	Endogenous1	-1.44	0.760749	-1.54	0.748869	1.4	0.794156
hsa-miR-1277-3p	Endogenous1	-1.94	0.644126	-2.87	0.459723	-4.78	0.293136
hsa-miR-1278	Endogenous1	-1.89	0.211134	-1.46	0.440221	-1.69	0.271714
hsa-miR-1279	Endogenous1	-1.52	0.531863	-1.69	0.404084	-1.58	0.467924
hsa-miR-128-1-5p	Endogenous1	-1.35	0.786048	-4.38	0.292515	-1.56	0.751448
hsa-miR-128-2-5p	Endogenous1	-1.89	0.211134	-1.07	0.894603	-1.69	0.271714
hsa-miR-128-3p	Endogenous1	-1.89	0.211134	-1.46	0.440221	-1.69	0.271714
hsa-miR-1281	Endogenous1	1.06	0.928121	-1.77	0.431243	1.11	0.909608
hsa-miR-1283	Endogenous1	-1.89	0.211134	-1.46	0.440221	-1.69	0.271714
hsa-miR-1285-3p	Endogenous1	-4.38	0.320112	-1.4	0.788648	-2.13	0.567621
hsa-miR-1285-5p	Endogenous1	-3.01	0.44594	-5.77	0.25518	-2.41	0.549044
hsa-miR-1286	Endogenous1	-1.89	0.211134	-1.32	0.606758	-1.69	0.271714
hsa-miR-1287-3p	Endogenous1	-2.1	0.215775	-1.77	0.321199	-1.01	0.99299
hsa-miR-1287-5p	Endogenous1	-1.21	0.85083	-1.79	0.654511	-1.53	0.714553
hsa-miR-1288-3p	Endogenous1	-1.89	0.211134	-1.46	0.440221	-1.69	0.271714
hsa-miR-1289	Endogenous1	-2.58	0.0217616	-1.99	0.097435	-1.61	0.376381
hsa-miR-129-2-3p	Endogenous1	2.42	0.393263	1.37	0.629727	-1.24	0.667666
hsa-miR-129-5p	Endogenous1	-2.38	0.502611	-1.53	0.735267	-2.42	0.489138
hsa-miR-1290	Endogenous1	-1.92	0.447055	-1.67	0.539211	-2.84	0.405817
hsa-miR-1291	Endogenous1	-1.27	0.680725	1.51	0.555161	1.24	0.787553
hsa-miR-1293	Endogenous1	-1.89	0.211134	-1.32	0.606758	-1.24	0.667666
hsa-miR-1295a	Endogenous1	-1.21	0.803669	-2.15	0.383145	-1.19	0.823777
hsa-miR-1296-3p	Endogenous1	-1.99	0.563753	-1.11	0.927429	1.53	0.68445
hsa-miR-1296-5p	Endogenous1	-1.89	0.211134	-1.1	0.894421	-1.69	0.271714
hsa-miR-1297	Endogenous1	-3.14	0.345602	-1.07	0.958757	-1.32	0.831293
hsa-miR-1298-5p	Endogenous1	1.13	0.855336	-2.19	0.345092	-1.46	0.640267
hsa-miR-1299	Endogenous1	1.63	0.702716	1.22	0.88918	1.99	0.593461
hsa-miR-1301-3p	Endogenous1	-1.89	0.211134	-1.46	0.440221	-1.69	0.271714
hsa-miR-1302	Endogenous1	-1.31	0.644733	-1.5	0.404202	-1.18	0.862426
hsa-miR-1303	Endogenous1	-2.2	0.438289	1.1	0.939578	-2.44	0.388437
hsa-miR-1304-3p	Endogenous1	-2.2	0.243402	-1.11	0.871225	-1.96	0.294861
hsa-miR-1304-5p	Endogenous1	-1.47	0.609802	1.59	0.444263	1.49	0.703051
hsa-miR-1305	Endogenous1	-1.72	0.517558	1.02	0.979733	1.44	0.71202
hsa-miR-1306-3p	Endogenous1	-1.1	0.947027	2.1	0.577658	1.89	0.629501
hsa-miR-1306-5p	Endogenous1	-1.01	0.9949	1.39	0.657944	1.16	0.862309
hsa-miR-1307-3p	Endogenous1	-1.64	0.677497	-2.32	0.553629	-2.27	0.569518
hsa-miR-1307-5p	Endogenous1	-1.11	0.931292	-1	0.998468	-1.04	0.977758
hsa-miR-130a-3p	Endogenous1	2.45	0.705654	-95.46	0.152185	-3.95	0.608865
hsa-miR-130b-3p	Endogenous1	-1.89	0.211134	-1.46	0.440221	-1.69	0.271714
hsa-miR-132-3p	Endogenous1	1.53	0.851701	-21.47	0.264107	-3.87	0.60629
hsa-miR-1322	Endogenous1	1.33	0.514113	1.19	0.820845	1.16	0.856928
hsa-miR-1323	Endogenous1	-3.34	0.337859	-2.65	0.426765	-1.6	0.754637
hsa-miR-133a-3p	Endogenous1	5.12	0.255047	-3.54	0.351151	-1.61	0.730933
hsa-miR-133a-5p	Endogenous1	-1.55	0.742746	1.06	0.967657	1.23	0.888666
hsa-miR-133b	Endogenous1	-1.89	0.211134	-1.46	0.440221	-1.69	0.271714
hsa-miR-134-3p	Endogenous1	2.16	0.184374	1.6	0.424764	1.74	0.443269
hsa-miR-134-5p+hsa-miR-6728-5p	Endogenous1	-1.89	0.211134	-1.46	0.440221	-1.27	0.606982
hsa-miR-135a-5p	Endogenous1	1.08	0.975978	-58.62	0.19979	-7.79	0.534457
hsa-miR-135b-5p	Endogenous1	1.37	0.905428	-50.81	0.229402	-2.99	0.727257
hsa-miR-136-5p	Endogenous1	3.93	0.565177	-75.65	0.160117	-4.38	0.583631
hsa-miR-137	Endogenous1	1.61	0.147826	1.46	0.664785	2.12	0.247184
hsa-miR-138-5p	Endogenous1	-1.42	0.477201	-1.2	0.796791	-2.53	0.371104
hsa-miR-139-3p	Endogenous1	-2.61	0.253008	-2.75	0.185994	1.14	0.657869
hsa-miR-139-5p	Endogenous1	-1.89	0.211134	-1.46	0.440221	-1.69	0.271714
hsa-miR-140-3p	Endogenous1	1.59	0.664627	-2.32	0.466689	-2.34	0.439571
hsa-miR-140-5p	Endogenous1	1.84	0.768754	-38.03	0.166739	-6.46	0.460497
hsa-miR-141-3p	Endogenous1	-1.42	0.888728	-46.82	0.216597	-7.51	0.516512
hsa-miR-142-3p	Endogenous1	1.93	0.80618	-363.95	0.111622	-5.54	0.61527
hsa-miR-142-5p	Endogenous1	-1.89	0.211134	-1.46	0.440221	1.05	0.949733
hsa-miR-143-3p	Endogenous1	6.67	0.564762	-184.56	0.198062	-27.53	0.390051
hsa-miR-144-3p	Endogenous1	1.25	0.929589	-80.3	0.165407	-5.02	0.567423
hsa-miR-145-5p	Endogenous1	4.62	0.569427	-22.67	0.297792	-2.49	0.733852
hsa-miR-1469	Endogenous1	-2.59	0.271818	-1.33	0.767725	1.11	0.90397
hsa-miR-146a-5p	Endogenous1	1.38	0.855019	-15.82	0.205744	-1.4	0.851788
hsa-miR-146b-3p	Endogenous1	-1.89	0.211134	-1.46	0.440221	-1.69	0.271714
hsa-miR-146b-5p	Endogenous1	-1.14	0.936293	-6.42	0.331261	-1.46	0.829575
hsa-miR-147a	Endogenous1	2.06	0.401852	1.56	0.584978	1.13	0.893676
hsa-miR-147b	Endogenous1	-1.62	0.721721	1.26	0.860905	-1.31	0.849842
hsa-miR-148a-3p	Endogenous1	2.41	0.70052	-248.17	0.100832	-7.6	0.520624
hsa-miR-148b-3p	Endogenous1	2.73	0.730137	-31.69	0.303363	-4.13	0.657406
hsa-miR-149-5p	Endogenous1	1.13	0.920187	-2.97	0.40753	1.11	0.932596
hsa-miR-150-5p	Endogenous1	1.77	0.754578	-7.4	0.343963	-1.74	0.776346
hsa-miR-151a-3p	Endogenous1	1.37	0.884659	-12.95	0.31371	-3.11	0.641246
hsa-miR-151a-5p	Endogenous1	2.11	0.706809	-20.76	0.213317	-2.76	0.646714
hsa-miR-151b	Endogenous1	-1.09	0.949006	-2.8	0.436945	-1.02	0.986401
hsa-miR-152-3p	Endogenous1	1.74	0.7759	-10.14	0.313165	-2.08	0.715289
hsa-miR-152-5p	Endogenous1	-1.89	0.211134	-1.46	0.440221	-1.69	0.271714
hsa-miR-153-3p	Endogenous1	1.47	0.641903	1.98	0.43235	-1.02	0.974015
hsa-miR-1537-3p	Endogenous1	-1.64	0.759386	-4.11	0.401884	-2.36	0.590095
hsa-miR-154-5p	Endogenous1	3.22	0.593744	-18.14	0.251577	-2.36	0.708842
hsa-miR-155-5p	Endogenous1	1.25	0.882951	-28.39	0.108103	-1.77	0.719451
hsa-miR-15a-5p	Endogenous1	1.54	0.842896	-219.71	0.0989958	-8.49	0.472596
hsa-miR-15b-5p	Endogenous1	2.34	0.711992	-36.06	0.201541	-2.61	0.700671
hsa-miR-16-5p	Endogenous1	1.64	0.808458	-25.8	0.201176	-2.31	0.715221
hsa-miR-181a-2-3p	Endogenous1	-3.84	0.240848	1.07	0.94374	1.42	0.71279
hsa-miR-181a-3p	Endogenous1	1.2	0.817268	1.55	0.5545	1.35	0.685753
hsa-miR-181a-5p	Endogenous1	1.49	0.845824	-58.11	0.135624	-5.21	0.498987
hsa-miR-181b-2-3p	Endogenous1	-1.73	0.601557	-4.11	0.145543	1.14	0.867612
hsa-miR-181b-5p+hsa-miR-181d-5p	Endogenous1	1.47	0.831012	-16.09	0.210889	-3.35	0.546596
hsa-miR-181c-5p	Endogenous1	1.45	0.850231	-20.31	0.218718	-3.36	0.589613
hsa-miR-181d-3p	Endogenous1	1.82	0.377057	1.67	0.473045	2.15	0.458915
hsa-miR-182-3p	Endogenous1	-1.89	0.211134	1.14	0.83074	-1.02	0.974015
hsa-miR-182-5p	Endogenous1	-3.52	0.221051	-2.71	0.296983	-1.52	0.691058
hsa-miR-1827	Endogenous1	-3.1	0.212384	-3.66	0.140685	-3.29	0.170232
hsa-miR-183-5p	Endogenous1	-3.7	0.280825	-6.53	0.140346	-2.59	0.365155
hsa-miR-184	Endogenous1	-6.58	0.0469884	-1.65	0.491728	1.08	0.893695
hsa-miR-185-5p	Endogenous1	-1.93	0.618147	-4.32	0.313822	-1.39	0.796035
hsa-miR-186-5p	Endogenous1	1.11	0.93196	-2.25	0.533362	-1.32	0.824894
hsa-miR-187-3p	Endogenous1	-1.48	0.703728	-5.4	0.179078	-1.82	0.56025
hsa-miR-188-3p	Endogenous1	-2.45	0.130899	-1.88	0.232056	-1.24	0.734037
hsa-miR-188-5p	Endogenous1	-1.85	0.455618	-4.83	0.169236	-1.99	0.40331
hsa-miR-18a-5p	Endogenous1	1.1	0.94973	-3.77	0.414342	-1.14	0.930548
hsa-miR-18b-5p	Endogenous1	-4.31	0.241059	-1.06	0.954679	-2.23	0.449727
hsa-miR-1908-3p	Endogenous1	-4.96	0.214165	-2.36	0.540667	-1.09	0.947605
hsa-miR-1908-5p	Endogenous1	-2.91	0.298741	-4.21	0.0453194	-2.46	0.343552
hsa-miR-1909-3p	Endogenous1	-2.13	0.0336989	-1.79	0.143776	-1.53	0.315781
hsa-miR-190a-3p	Endogenous1	1.36	0.672593	-1.46	0.626018	-2.31	0.315885
hsa-miR-190a-5p	Endogenous1	10.03	0.276233	-16.66	0.211597	-1.53	0.840865
hsa-miR-190b	Endogenous1	-1.89	0.211134	-1.46	0.440221	-1.69	0.271714
hsa-miR-191-5p	Endogenous1	1.69	0.796471	-16.69	0.250658	-2.07	0.738547
hsa-miR-1910-3p	Endogenous1	-1.89	0.211134	1.58	0.633198	1.26	0.802372
hsa-miR-1910-5p	Endogenous1	2.04	0.618698	-3.77	0.379386	-1.04	0.977438
hsa-miR-1915-3p	Endogenous1	-3.33	0.208154	-2.82	0.253751	-3.27	0.214023
hsa-miR-192-5p	Endogenous1	-2.59	0.271818	-2	0.395509	-2.31	0.315885
hsa-miR-193a-3p	Endogenous1	1.44	0.761239	-1.91	0.616078	1.29	0.843874
hsa-miR-193a-5p+hsa-miR-193b-5p	Endogenous1	1.37	0.826029	-5.63	0.292878	-1.08	0.961567
hsa-miR-193b-3p	Endogenous1	1.77	0.710188	-4.75	0.374775	-1.43	0.841337
hsa-miR-194-5p	Endogenous1	1.47	0.81685	-12.99	0.215928	-1.82	0.754167
hsa-miR-195-5p	Endogenous1	6.2	0.338172	-14.02	0.205282	-2.06	0.743015
hsa-miR-196a-3p	Endogenous1	-2.58	0.0217616	-1.12	0.84135	-1.86	0.0459924
hsa-miR-196a-5p	Endogenous1	1.29	0.781046	-3.04	0.242349	-1.33	0.722472
hsa-miR-196b-5p	Endogenous1	2.49	0.687691	-68.52	0.158428	-5.75	0.503224
hsa-miR-197-3p	Endogenous1	-2.65	0.373309	-4.37	0.194528	-4.42	0.17896
hsa-miR-197-5p	Endogenous1	-3.53	0.0351223	-4.66	0.0912175	-2.37	0.421014
hsa-miR-1972	Endogenous1	-5.57	0.369419	-16.15	0.200754	-2.79	0.582729
hsa-miR-1973	Endogenous1	1.31	0.777213	1.69	0.598136	-1.71	0.617797
hsa-miR-1976	Endogenous1	-2.44	0.224199	1.32	0.691353	-1.16	0.841423
hsa-miR-198	Endogenous1	-4.84	0.327906	-1.91	0.650581	-1.77	0.694035
hsa-miR-199a-3p+hsa-miR-199b-3p	Endogenous1	3.89	0.518233	-134.12	0.0997363	-3.5	0.625122
hsa-miR-199a-5p	Endogenous1	2.71	0.682915	-34.14	0.231904	-2.81	0.686928
hsa-miR-199b-5p	Endogenous1	4.85	0.460812	-56.47	0.137363	-2.34	0.735523
hsa-miR-19a-3p	Endogenous1	-1.25	0.907021	-14.18	0.208132	-3.94	0.480798
hsa-miR-19b-3p	Endogenous1	1.5	0.829698	-16.32	0.219396	-2.43	0.664374
hsa-miR-200a-3p	Endogenous1	-2.01	0.761921	-84.55	0.137216	-11.46	0.397136
hsa-miR-200b-3p	Endogenous1	1.05	0.984255	-167.93	0.132172	-7.03	0.528682
hsa-miR-200c-3p	Endogenous1	1.14	0.958607	-29.13	0.278608	-4.67	0.650044
hsa-miR-202-3p	Endogenous1	1.31	0.806808	1.36	0.822937	2.23	0.468912
hsa-miR-203a-3p	Endogenous1	1.45	0.601698	-8.78	0.0400138	-1.81	0.786224
hsa-miR-203a-5p	Endogenous1	1.63	0.515103	2.16	0.323888	1.95	0.416679
hsa-miR-204-5p	Endogenous1	2	0.697875	-6.19	0.354138	-1.97	0.710841
hsa-miR-205-5p	Endogenous1	1.26	0.849626	-6.93	0.21646	-1.59	0.81035
hsa-miR-2053	Endogenous1	-1.03	0.971821	1.19	0.844053	1.31	0.74924
hsa-miR-206	Endogenous1	-1.64	0.66094	-1.93	0.528001	-1.69	0.59963
hsa-miR-208a-3p	Endogenous1	-2.33	0.396932	-6.2	0.150925	-2.69	0.318073
hsa-miR-208b-3p	Endogenous1	1.64	0.633254	3.41	0.293138	2.87	0.374656
hsa-miR-208b-5p	Endogenous1	-1.46	0.439667	1.2	0.850887	1.46	0.52224
hsa-miR-20a-5p+hsa-miR-20b-5p	Endogenous1	1.64	0.814131	-14.05	0.286316	-1.77	0.803713
hsa-miR-21-5p	Endogenous1	1.32	0.909611	-500.74	0.0886321	-6.99	0.528514
hsa-miR-210-3p	Endogenous1	1.18	0.874875	-2.42	0.395499	-1.19	0.866523
hsa-miR-210-5p	Endogenous1	-2.08	0.284117	-2.57	0.350065	-1.34	0.635597
hsa-miR-211-3p	Endogenous1	-1.89	0.211134	-1.46	0.440221	-1.69	0.271714
hsa-miR-211-5p	Endogenous1	-1.22	0.795708	2.25	0.058895	1.69	0.388991
hsa-miR-2110	Endogenous1	-1.05	0.95152	3.33	0.176796	1.23	0.841819
hsa-miR-2113	Endogenous1	-3.19	0.143587	-2.46	0.204668	-2.85	0.165935
hsa-miR-2116-5p	Endogenous1	-1.89	0.211134	-1.46	0.440221	-1.69	0.271714
hsa-miR-2117	Endogenous1	-3	0.399851	-3.36	0.330527	-1.13	0.924225
hsa-miR-212-3p	Endogenous1	-2.13	0.37869	-1.78	0.472469	-2.87	0.414336
hsa-miR-214-3p	Endogenous1	1.41	0.82947	-11.16	0.212345	-4.77	0.401669
hsa-miR-215-5p	Endogenous1	-1.89	0.211134	-1.46	0.440221	-1.69	0.271714
hsa-miR-216a-5p	Endogenous1	1.8	0.514813	-1.18	0.844432	-1.46	0.705868
hsa-miR-216b-5p	Endogenous1	-1.24	0.860112	-10.06	0.141592	-1.2	0.873239
hsa-miR-217	Endogenous1	-1.77	0.67376	-2.72	0.490444	-1.74	0.67516
hsa-miR-218-5p	Endogenous1	3.54	0.53482	-69.78	0.113179	-2.62	0.683378
hsa-miR-219a-1-3p	Endogenous1	1.2	0.779998	1.05	0.927463	2.54	0.309345
hsa-miR-219a-2-3p	Endogenous1	1.34	0.767985	-2.23	0.517136	-1.5	0.779195
hsa-miR-219a-5p	Endogenous1	1.93	0.355422	-1.14	0.789444	2.34	0.343286
hsa-miR-219b-3p	Endogenous1	-4.2	0.166006	-1.3	0.79207	-1.47	0.754531
hsa-miR-22-3p	Endogenous1	1.87	0.798214	-50.62	0.204176	-4.55	0.586576
hsa-miR-221-3p	Endogenous1	-1.58	0.74888	-5.64	0.285832	-2.13	0.629724
hsa-miR-221-5p	Endogenous1	1.96	0.563	-3.31	0.324878	-1.19	0.881649
hsa-miR-222-3p	Endogenous1	3.19	0.714011	-49.81	0.285475	-2.07	0.830602
hsa-miR-223-3p	Endogenous1	-1.22	0.932821	-107.62	0.150771	-6.15	0.510892
hsa-miR-224-5p	Endogenous1	-1.28	0.827967	-2.34	0.408236	-1.54	0.749746
hsa-miR-2278	Endogenous1	-1.89	0.211134	-1.46	0.440221	-1.47	0.392599
hsa-miR-23a-3p	Endogenous1	1.52	0.816135	-44.53	0.118734	-3.57	0.534356
hsa-miR-23b-3p	Endogenous1	1.6	0.834649	-55.73	0.168934	-4.72	0.530917
hsa-miR-23c	Endogenous1	1.54	0.618365	2.11	0.24972	-1.3	0.678871
hsa-miR-24-3p	Endogenous1	1	0.997676	-57.7	0.0973453	-5.94	0.422082
hsa-miR-25-3p	Endogenous1	3.55	0.636558	-48.89	0.224774	-1.65	0.866463
hsa-miR-25-5p	Endogenous1	-1.51	0.535164	1.94	0.0348071	1.07	0.919128
hsa-miR-2682-5p	Endogenous1	1.2	0.779998	-1.46	0.440221	1.91	0.369663
hsa-miR-26a-5p	Endogenous1	1.86	0.743013	-38.32	0.148259	-4.19	0.519035
hsa-miR-26b-5p	Endogenous1	1.96	0.739818	-65.78	0.130832	-4.04	0.556518
hsa-miR-27a-3p	Endogenous1	2.22	0.483757	-2.19	0.448763	1.14	0.909807
hsa-miR-27b-3p	Endogenous1	2.35	0.755336	-159.45	0.160991	-4.16	0.640378
hsa-miR-28-3p	Endogenous1	-1.28	0.77045	-14.74	0.0518748	-3.39	0.208846
hsa-miR-28-5p	Endogenous1	2.02	0.673007	-17.63	0.171501	-4.7	0.451028
hsa-miR-296-3p	Endogenous1	-2.31	0.198354	1.04	0.955415	-3.25	0.0305156
hsa-miR-296-5p	Endogenous1	2.63	0.589112	-13.9	0.216719	-1.23	0.906752
hsa-miR-297	Endogenous1	-1.89	0.211134	-1.46	0.440221	-1.69	0.271714
hsa-miR-298	Endogenous1	1.01	0.991066	1.27	0.744346	2.55	0.0864921
hsa-miR-299-3p	Endogenous1	1.84	0.663815	-7.32	0.216533	-1.35	0.819832
hsa-miR-299-5p	Endogenous1	1.6	0.774889	-5.61	0.343973	-2.7	0.55744
hsa-miR-29a-3p	Endogenous1	1.51	0.847035	-76.85	0.130416	-2.7	0.689874
hsa-miR-29b-3p	Endogenous1	1.58	0.831895	-236.56	0.0856803	-10.83	0.420627
hsa-miR-29c-3p	Endogenous1	2.58	0.714763	-66.5	0.196593	-2.56	0.735524
hsa-miR-300	Endogenous1	-1.89	0.211134	-1.37	0.502158	-1.69	0.271714
hsa-miR-301a-3p	Endogenous1	1.03	0.981764	-20.6	0.100305	-3.67	0.383459
hsa-miR-301a-5p	Endogenous1	-1.39	0.652178	2.96	0.172054	2.01	0.18867
hsa-miR-301b-3p	Endogenous1	-2.43	0.451911	-2.48	0.464366	1.16	0.896906
hsa-miR-301b-5p	Endogenous1	1.17	0.864833	1.18	0.856106	1.51	0.66442
hsa-miR-302a-3p	Endogenous1	-2.02	0.316933	-2.05	0.302488	-1.44	0.638402
hsa-miR-302a-5p	Endogenous1	-1.43	0.474487	-1.46	0.440221	-1.69	0.271714
hsa-miR-302b-3p	Endogenous1	-1.43	0.754717	-2.01	0.549801	-1.71	0.65285
hsa-miR-302c-3p	Endogenous1	-4.87	0.161917	-1.86	0.525131	-5.86	0.129164
hsa-miR-302d-3p	Endogenous1	-1.89	0.211134	-1.46	0.440221	-1.69	0.271714
hsa-miR-302e	Endogenous1	-1.89	0.211134	-1.1	0.894421	-1.69	0.271714
hsa-miR-302f	Endogenous1	-1.2	0.76709	-1.46	0.440221	-1.36	0.486485
hsa-miR-3065-3p	Endogenous1	-2.18	0.564199	-3.96	0.318548	-2.04	0.611075
hsa-miR-3065-5p	Endogenous1	-1.89	0.211134	-1.46	0.440221	1.76	0.646677
hsa-miR-3074-3p	Endogenous1	-1.03	0.970416	-1.3	0.65226	2.15	0.408648
hsa-miR-30a-3p	Endogenous1	1	0.999668	-4.35	0.46482	-1.23	0.913039
hsa-miR-30a-5p	Endogenous1	-1.07	0.979453	-54.28	0.216508	-6.65	0.534066
hsa-miR-30b-5p	Endogenous1	2.45	0.68576	-20.29	0.249796	-3.74	0.588999
hsa-miR-30c-5p	Endogenous1	1.74	0.75325	-14.59	0.211406	-3.31	0.546122
hsa-miR-30d-5p	Endogenous1	2.03	0.773376	-48.75	0.201796	-2.41	0.740989
hsa-miR-30e-3p	Endogenous1	-1.02	0.986517	-22.67	0.11528	-3.94	0.386749
hsa-miR-30e-5p	Endogenous1	1.36	0.872826	-12.25	0.270843	-2.79	0.626801
hsa-miR-31-5p	Endogenous1	-4.69	0.424531	-8.51	0.294109	-4.53	0.486072
hsa-miR-3127-5p	Endogenous1	-1.89	0.211134	-1.26	0.613108	-1.69	0.271714
hsa-miR-3130-3p	Endogenous1	-1.62	0.302181	-1.46	0.440221	-1.02	0.974015
hsa-miR-3131	Endogenous1	-3.49	0.0482217	1.94	0.258865	-1.36	0.603108
hsa-miR-3136-5p	Endogenous1	-1.7	0.614715	-1.41	0.792571	-1.27	0.840198
hsa-miR-3140-3p	Endogenous1	-1.89	0.211134	-1.1	0.894421	-1.69	0.271714
hsa-miR-3140-5p	Endogenous1	-1.89	0.211134	-1.46	0.440221	-1.69	0.271714
hsa-miR-3144-3p	Endogenous1	-1.89	0.211134	1.22	0.763395	1.32	0.760924
hsa-miR-3144-5p	Endogenous1	-2.54	0.39953	-2.28	0.471309	-1.74	0.577296
hsa-miR-3147	Endogenous1	1.18	0.834512	1	0.997881	-1.24	0.845994
hsa-miR-3150b-3p	Endogenous1	-3.35	0.303489	-2.58	0.396183	-1.18	0.877966
hsa-miR-3151-5p	Endogenous1	-6.71	0.198944	-2.74	0.444935	-1.69	0.691789
hsa-miR-3158-3p	Endogenous1	-1.89	0.211134	-1.46	0.440221	-1.69	0.271714
hsa-miR-3161	Endogenous1	-1.27	0.838509	-2.34	0.594005	-1.18	0.899481
hsa-miR-3164	Endogenous1	-2.97	0.0304433	1.62	0.618347	1.78	0.596835
hsa-miR-3168	Endogenous1	-1.93	0.592076	-1.23	0.85546	-1.04	0.976178
hsa-miR-3179	Endogenous1	-2.81	0.405045	1.1	0.946915	1.4	0.800992
hsa-miR-3180	Endogenous1	-1.51	0.519858	1.11	0.904447	-1.21	0.803174
hsa-miR-3180-3p	Endogenous1	-1.89	0.211134	-1.46	0.440221	-1.69	0.271714
hsa-miR-3180-5p	Endogenous1	-1.89	0.211134	-1.32	0.606758	-1.69	0.271714
hsa-miR-3182	Endogenous1	-1.94	0.486886	-2.23	0.39497	-1.46	0.705868
hsa-miR-3185	Endogenous1	-1.89	0.211134	-1.32	0.606758	-1.69	0.271714
hsa-miR-3190-3p	Endogenous1	-1.89	0.211134	-1.46	0.440221	-1.69	0.271714
hsa-miR-3192-5p	Endogenous1	-1.27	0.680725	1.12	0.89913	-1.69	0.271714
hsa-miR-3195	Endogenous1	1.42	0.72464	-1.19	0.838807	1.57	0.546277
hsa-miR-3196	Endogenous1	-1.95	0.532969	-1.94	0.56156	1.09	0.935372
hsa-miR-32-5p	Endogenous1	2.24	0.764619	-21.41	0.321309	-4	0.653955
hsa-miR-3202	Endogenous1	-1.89	0.211134	1.12	0.89913	2.24	0.387477
hsa-miR-320a	Endogenous1	-1.67	0.62972	-1.73	0.647389	-1.07	0.955309
hsa-miR-320b	Endogenous1	1.01	0.988698	-1.1	0.894421	-1.11	0.85746
hsa-miR-320c	Endogenous1	-5.28	0.0834601	-1.68	0.651756	1.57	0.44141
hsa-miR-320d	Endogenous1	-1.46	0.439667	-1.46	0.440221	1.34	0.585672
hsa-miR-320e	Endogenous1	1.18	0.915775	-5.04	0.339032	-1.39	0.836847
hsa-miR-323a-3p	Endogenous1	1.02	0.984225	-8.06	0.18431	-3.26	0.411754
hsa-miR-323a-5p	Endogenous1	-1.89	0.211134	-1.46	0.440221	-1.69	0.271714
hsa-miR-323b-3p	Endogenous1	-1.4	0.760032	1.1	0.938139	1.1	0.934106
hsa-miR-323b-5p	Endogenous1	-1.89	0.211134	-1.46	0.440221	-1.69	0.271714
hsa-miR-324-3p	Endogenous1	-2.24	0.230514	-1.88	0.29653	-4.2	0.15281
hsa-miR-324-5p	Endogenous1	-1.19	0.905457	-7.31	0.238048	-3.16	0.494485
hsa-miR-325	Endogenous1	1.06	0.964364	-2.41	0.523458	1.41	0.786224
hsa-miR-326	Endogenous1	-2.71	0.0949694	-1.03	0.979332	-1.04	0.968143
hsa-miR-328-3p	Endogenous1	-1.02	0.979505	-1.44	0.640421	1.07	0.897451
hsa-miR-328-5p	Endogenous1	-1.89	0.211134	1.05	0.932489	-1.69	0.271714
hsa-miR-329-3p	Endogenous1	-1.58	0.624018	-1.12	0.906382	2.34	0.370582
hsa-miR-329-5p	Endogenous1	-1.5	0.680841	-3.15	0.328978	-1.78	0.625772
hsa-miR-330-3p	Endogenous1	-1.89	0.211134	-1.1	0.894421	1.34	0.766134
hsa-miR-330-5p	Endogenous1	-2.2	0.243402	-1.28	0.753332	-1.71	0.381907
hsa-miR-331-3p	Endogenous1	-1.6	0.78034	-11.01	0.243225	-5.43	0.407988
hsa-miR-331-5p	Endogenous1	-1.89	0.211134	-1.46	0.440221	-1.69	0.271714
hsa-miR-335-5p	Endogenous1	2.57	0.348335	-6.9	0.111513	-1.66	0.578401
hsa-miR-337-3p	Endogenous1	1.21	0.864491	-6.98	0.15661	-2.29	0.456558
hsa-miR-337-5p	Endogenous1	1.72	0.659096	-8.09	0.1681	-2.33	0.500778
hsa-miR-338-5p	Endogenous1	1.45	0.618635	2.17	0.183944	-1.24	0.667666
hsa-miR-339-3p	Endogenous1	-3.14	0.2966	-2.42	0.395499	-2.8	0.334058
hsa-miR-339-5p	Endogenous1	-3.82	0.23075	-1.93	0.507055	-2.51	0.366497
hsa-miR-33a-5p	Endogenous1	1.09	0.953357	-8.92	0.21421	-4.48	0.371777
hsa-miR-33b-5p	Endogenous1	-1.43	0.236702	-1.19	0.545292	-2.67	0.209438
hsa-miR-340-5p	Endogenous1	2.55	0.686591	-22.87	0.252457	-1.81	0.797261
hsa-miR-342-3p	Endogenous1	2.3	0.681522	-8.49	0.344768	-1.82	0.779627
hsa-miR-342-5p	Endogenous1	-1.09	0.954211	-2.48	0.549834	-1.39	0.828747
hsa-miR-345-3p	Endogenous1	-3.19	0.221043	-2.46	0.306349	-2.85	0.25274
hsa-miR-345-5p	Endogenous1	-1.02	0.991134	-4.53	0.278785	-1.21	0.887347
hsa-miR-346	Endogenous1	-1.46	0.791849	2.17	0.631788	-1.75	0.72122
hsa-miR-34a-5p	Endogenous1	-1.09	0.968799	-32.9	0.189721	-3.13	0.62877
hsa-miR-34b-3p	Endogenous1	-2.01	0.417287	-2.42	0.272821	-2.7	0.297211
hsa-miR-34c-3p	Endogenous1	-2.43	0.570028	-9.99	0.215997	-3.69	0.438105
hsa-miR-34c-5p	Endogenous1	-3.7	0.52883	-19.31	0.206818	-4.07	0.567113
hsa-miR-3605-3p	Endogenous1	-1.89	0.211134	-1.46	0.440221	-1.69	0.271714
hsa-miR-3605-5p	Endogenous1	1.21	0.77397	1.14	0.873668	1.16	0.841933
hsa-miR-361-3p	Endogenous1	1.5	0.829693	-38.84	0.154013	-4.79	0.494814
hsa-miR-361-5p	Endogenous1	2.78	0.692956	-43.04	0.230675	-3.3	0.684256
hsa-miR-3613-3p	Endogenous1	-1.89	0.211134	-1.46	0.440221	-1.18	0.719487
hsa-miR-3613-5p	Endogenous1	-1.89	0.211134	-1.46	0.440221	-1.69	0.271714
hsa-miR-3614-3p	Endogenous1	-1.89	0.211134	1.27	0.816784	1.26	0.802372
hsa-miR-3614-5p	Endogenous1	-4.62	0.192704	-1.12	0.900842	-2.93	0.369768
hsa-miR-3615	Endogenous1	-1.69	0.619969	1.15	0.915287	-1.66	0.627103
hsa-miR-362-3p	Endogenous1	2.89	0.425285	-3.8	0.332809	-1.33	0.834159
hsa-miR-362-5p	Endogenous1	2.18	0.631228	-2.45	0.584844	-1.12	0.944937
hsa-miR-363-3p	Endogenous1	-1.23	0.887323	-5.15	0.331357	-2	0.648373
hsa-miR-363-5p	Endogenous1	1.33	0.697768	2.45	0.465858	4.12	0.0349984
hsa-miR-365a-3p+hsa-miR-365b-3p	Endogenous1	1.78	0.749169	-27.83	0.154153	-2.02	0.697543
hsa-miR-365b-5p	Endogenous1	1.18	0.871634	-1.27	0.858621	2.22	0.479421
hsa-miR-367-3p	Endogenous1	1.54	0.412941	1.37	0.667707	2.11	0.463063
hsa-miR-369-3p	Endogenous1	1.03	0.952748	1.07	0.873183	-1.71	0.580162
hsa-miR-369-5p	Endogenous1	-1.89	0.211134	-1.46	0.440221	-1.24	0.667666
hsa-miR-3690	Endogenous1	-1.37	0.61532	-1.35	0.773995	-1.22	0.827253
hsa-miR-370-3p	Endogenous1	-1.65	0.547047	-2.03	0.415752	-1.31	0.744597
hsa-miR-370-5p	Endogenous1	-1.68	0.55485	2	0.425805	1.46	0.700325
hsa-miR-371a-5p	Endogenous1	-2.15	0.507733	-5.48	0.176091	-3.19	0.366092
hsa-miR-371b-5p	Endogenous1	-3.4	0.268845	-1.64	0.671095	-2.85	0.329897
hsa-miR-372-3p	Endogenous1	-1.89	0.211134	-1.46	0.440221	-1.69	0.271714
hsa-miR-373-3p	Endogenous1	-1.49	0.659295	-1.93	0.472114	-2.58	0.326987
hsa-miR-374a-3p	Endogenous1	-2.59	0.271818	1.06	0.966187	-2.02	0.383801
hsa-miR-374a-5p	Endogenous1	2.09	0.724497	-107.77	0.107903	-6.41	0.483176
hsa-miR-374b-5p	Endogenous1	1.47	0.840612	-7.94	0.336153	-2.31	0.677002
hsa-miR-374c-5p	Endogenous1	-1.22	0.863366	-2.36	0.457056	1.65	0.678725
hsa-miR-375	Endogenous1	-2.05	0.613382	-2.28	0.589977	-1.51	0.792489
hsa-miR-376a-2-5p	Endogenous1	-1.46	0.439667	1.28	0.723518	-1.38	0.45905
hsa-miR-376a-3p	Endogenous1	2.36	0.586363	-9.7	0.22037	-2.77	0.544598
hsa-miR-376b-3p	Endogenous1	-1.89	0.211134	-1.46	0.440221	-1.69	0.271714
hsa-miR-376c-3p	Endogenous1	3.68	0.559032	-18.55	0.252653	-3.14	0.635853
hsa-miR-376c-5p	Endogenous1	-1.89	0.211134	-1.46	0.440221	-1.69	0.271714
hsa-miR-377-3p	Endogenous1	3.18	0.574992	-11.61	0.296935	-2.97	0.625492
hsa-miR-378b	Endogenous1	-2.89	0.286919	-2.23	0.39497	-1.63	0.602142
hsa-miR-378c	Endogenous1	-2.37	0.405091	-2.19	0.448763	-2.06	0.477385
hsa-miR-378d	Endogenous1	2.4	0.500613	-1.12	0.925268	1.47	0.749654
hsa-miR-378e	Endogenous1	-1.89	0.211134	-1.46	0.440221	-1.69	0.271714
hsa-miR-378f	Endogenous1	-1.78	0.59358	1.98	0.486562	-1.11	0.917963
hsa-miR-378g	Endogenous1	1.51	0.82587	-5.28	0.41508	-2.04	0.719353
hsa-miR-378h	Endogenous1	-1.79	0.55978	-2.59	0.329512	-1.45	0.741966
hsa-miR-378i	Endogenous1	1.68	0.727907	-14.73	0.151502	-1.26	0.886378
hsa-miR-379-5p	Endogenous1	3.29	0.586314	-12.05	0.306543	-2.96	0.651067
hsa-miR-380-3p	Endogenous1	-1.89	0.211134	-1.46	0.440221	-1.24	0.667666
hsa-miR-381-3p	Endogenous1	2.32	0.590231	-5.88	0.297402	-4.09	0.39913
hsa-miR-381-5p	Endogenous1	-1.89	0.211134	1.03	0.97363	-1.11	0.85746
hsa-miR-382-3p	Endogenous1	-1.09	0.889241	1.55	0.591122	1.07	0.912887
hsa-miR-382-5p	Endogenous1	3.85	0.501509	-20.08	0.207889	-2.13	0.727985
hsa-miR-383-5p	Endogenous1	-2.2	0.243402	-1.69	0.404084	-1.24	0.751579
hsa-miR-384	Endogenous1	-1.89	0.211134	-1.26	0.613108	1.94	0.3799
hsa-miR-3916	Endogenous1	-1.89	0.211134	-1.46	0.440221	-1.01	0.989001
hsa-miR-3918	Endogenous1	-2.9	0.356487	-2.9	0.356828	1.27	0.845734
hsa-miR-3928-3p	Endogenous1	-1.61	0.706434	-4	0.364707	-1.34	0.812474
hsa-miR-3934-5p	Endogenous1	-1.33	0.540626	1.29	0.759851	1.21	0.826551
hsa-miR-409-3p	Endogenous1	1.1	0.946602	-4.71	0.330855	-2.75	0.494216
hsa-miR-409-5p	Endogenous1	-1.89	0.211134	-1.46	0.440221	-1.69	0.271714
hsa-miR-410-3p	Endogenous1	1.1	0.910799	-1.1	0.894421	1.3	0.782617
hsa-miR-411-5p	Endogenous1	2.16	0.690782	-20.8	0.205003	-4.21	0.499156
hsa-miR-412-3p	Endogenous1	-1.03	0.968418	-1.55	0.329432	-1.44	0.420502
hsa-miR-421	Endogenous1	1.18	0.909782	-1.07	0.96219	-1.17	0.911935
hsa-miR-422a	Endogenous1	-1.89	0.211134	-1.46	0.440221	-1.69	0.271714
hsa-miR-423-3p	Endogenous1	-1.65	0.762351	-4.43	0.418178	-3.4	0.505142
hsa-miR-423-5p	Endogenous1	-1.13	0.954018	-13.77	0.27601	-2.13	0.715473
hsa-miR-424-5p	Endogenous1	4.24	0.432065	-306.83	0.0394258	-5.43	0.524613
hsa-miR-425-5p	Endogenous1	-2.36	0.641914	-8.13	0.295342	-2.38	0.655399
hsa-miR-4284	Endogenous1	-2.36	0.30675	1.53	0.590835	-1.19	0.828412
hsa-miR-4286	Endogenous1	-1.03	0.98236	-5.95	0.177955	-2.5	0.4425
hsa-miR-429	Endogenous1	-1.95	0.737219	-12.53	0.276979	-2.31	0.687863
hsa-miR-431-5p	Endogenous1	-5.79	0.203844	-2.3	0.56245	-1.78	0.632288
hsa-miR-432-5p	Endogenous1	-1.36	0.843688	-3.22	0.433524	-1.38	0.822686
hsa-miR-433-3p	Endogenous1	1.47	0.589486	-1.46	0.440221	-1.13	0.80991
hsa-miR-433-5p	Endogenous1	-1.26	0.770458	-1.47	0.525952	2.28	0.223953
hsa-miR-4421	Endogenous1	-2.07	0.510176	-1.92	0.526526	-1.93	0.537838
hsa-miR-4425	Endogenous1	-1.99	0.526076	-2.58	0.396183	1.46	0.718339
hsa-miR-4431	Endogenous1	-1.89	0.211134	-1.46	0.440221	-1.11	0.855212
hsa-miR-4435	Endogenous1	-1.43	0.474487	-1.1	0.894421	1.05	0.949733
hsa-miR-4443	Endogenous1	-2.05	0.631416	-18.97	0.13104	-2.64	0.51543
hsa-miR-4448	Endogenous1	1.02	0.983355	-1.46	0.440221	-1.11	0.85746
hsa-miR-4451	Endogenous1	-2.12	0.0346958	-1.3	0.498908	1.02	0.983132
hsa-miR-4454+hsa-miR-7975	Endogenous1	1.23	0.91924	-9.64	0.349565	-2.4	0.679301
hsa-miR-4455	Endogenous1	-1.86	0.580915	-2.73	0.396841	-3.16	0.342856
hsa-miR-4458	Endogenous1	-1.3	0.692723	-1.41	0.464723	1.55	0.640963
hsa-miR-4461	Endogenous1	-1.99	0.0998432	-1.72	0.12428	1	0.993741
hsa-miR-448	Endogenous1	2.05	0.314339	2.63	0.185537	-1.04	0.947267
hsa-miR-4485-3p	Endogenous1	1.24	0.749231	-1.46	0.440221	1.42	0.600355
hsa-miR-4488	Endogenous1	-2.34	0.602612	-1.81	0.687181	-1.11	0.942327
hsa-miR-449a	Endogenous1	-2.06	0.523726	-2.58	0.396183	-1.45	0.756412
hsa-miR-449b-5p	Endogenous1	1.18	0.805165	-2.32	0.398817	-1.26	0.803507
hsa-miR-449c-5p	Endogenous1	-1.08	0.911263	1.7	0.49683	1.73	0.453211
hsa-miR-450a-1-3p	Endogenous1	2.23	0.427076	1.02	0.989513	2.18	0.474907
hsa-miR-450a-2-3p	Endogenous1	-1.04	0.973372	1.6	0.568929	1.58	0.569306
hsa-miR-450a-5p	Endogenous1	2.25	0.710962	-341.6	0.0864694	-11.84	0.385359
hsa-miR-450b-3p	Endogenous1	-1.58	0.682892	-2.28	0.406551	-1.79	0.63115
hsa-miR-450b-5p	Endogenous1	1.15	0.937553	-15.59	0.219558	-4.52	0.454869
hsa-miR-4516	Endogenous1	-2.36	0.596685	-5.88	0.32192	-5.11	0.359187
hsa-miR-451a	Endogenous1	1.22	0.916227	-197.6	0.0639086	-5.58	0.458419
hsa-miR-452-5p	Endogenous1	-1.89	0.211134	-1.46	0.440221	-1.47	0.392599
hsa-miR-4521	Endogenous1	-1.26	0.854682	-1.63	0.75598	-1.06	0.965705
hsa-miR-4524a-5p	Endogenous1	-1.89	0.211134	-1.46	0.440221	-1.69	0.271714
hsa-miR-4531	Endogenous1	-3.08	0.210235	-3.57	0.160744	-2.47	0.305459
hsa-miR-4532	Endogenous1	-2.25	0.375711	-1.39	0.719617	-3.03	0.259746
hsa-miR-4536-3p	Endogenous1	1.16	0.763791	-1.26	0.613108	3.33	0.179692
hsa-miR-4536-5p	Endogenous1	-4.07	0.309011	-4.09	0.326841	-1.58	0.739127
hsa-miR-454-3p	Endogenous1	1.22	0.913125	-10.45	0.270363	-4.57	0.452013
hsa-miR-455-3p	Endogenous1	1.61	0.716484	-1.46	0.440221	-1.58	0.320046
hsa-miR-455-5p	Endogenous1	4.83	0.570697	-10.79	0.414909	-4.62	0.61625
hsa-miR-4647	Endogenous1	-2.07	0.355303	-1.25	0.822128	1.2	0.875102
hsa-miR-4707-3p	Endogenous1	-1.02	0.977271	1.13	0.83994	1.38	0.752139
hsa-miR-4707-5p	Endogenous1	1.2	0.745863	-1.28	0.831076	1.99	0.123174
hsa-miR-4741	Endogenous1	-1.39	0.721129	-1.36	0.781709	-1.38	0.754772
hsa-miR-4755-5p	Endogenous1	-1.02	0.967075	-2.31	0.0953211	2.06	0.278612
hsa-miR-4787-3p	Endogenous1	-1.89	0.211134	1.09	0.843767	1.16	0.856928
hsa-miR-4787-5p	Endogenous1	-4.03	0.24145	-2.41	0.434445	-2.33	0.435731
hsa-miR-4792	Endogenous1	-1.43	0.474487	1.28	0.723518	-1.24	0.667666
hsa-miR-483-3p	Endogenous1	-5.91	0.113521	-4.67	0.206549	-9.53	0.0760776
hsa-miR-483-5p	Endogenous1	-1.89	0.211134	-1.46	0.440221	-1.69	0.271714
hsa-miR-484	Endogenous1	-1.95	0.593091	-2.56	0.46962	-1.19	0.899812
hsa-miR-485-3p	Endogenous1	1.71	0.665859	1.08	0.958142	-1.14	0.916224
hsa-miR-485-5p	Endogenous1	-1.08	0.911263	1.15	0.799662	-1.24	0.667666
hsa-miR-486-3p	Endogenous1	-1.3	0.629649	-1.32	0.606758	1.04	0.954456
hsa-miR-487a-3p	Endogenous1	2.45	0.391037	1.09	0.940201	-1.7	0.572806
hsa-miR-487b-3p	Endogenous1	1.17	0.868297	-1.46	0.440221	-1.69	0.271714
hsa-miR-487b-5p	Endogenous1	-2.68	0.093989	-2.91	0.0332902	-1.23	0.793701
hsa-miR-488-3p	Endogenous1	-3.51	0.436094	-2.87	0.501941	-2.01	0.674214
hsa-miR-489-3p	Endogenous1	-2.23	0.50626	-3.96	0.278852	-4.6	0.246561
hsa-miR-490-3p	Endogenous1	-2.1	0.215775	-1.77	0.321199	-2.06	0.225869
hsa-miR-490-5p	Endogenous1	-1.09	0.872526	3.46	0.128484	2.1	0.368647
hsa-miR-491-3p	Endogenous1	1.52	0.678431	1.54	0.687699	2.19	0.515115
hsa-miR-491-5p	Endogenous1	-2.33	0.49581	-6.25	0.293751	-2.38	0.492718
hsa-miR-492	Endogenous1	-1.95	0.261138	1.12	0.902725	1.81	0.524027
hsa-miR-493-3p	Endogenous1	1.11	0.947506	-2.17	0.657249	1.19	0.908504
hsa-miR-494-3p	Endogenous1	-1.89	0.211134	-1.46	0.440221	-1.69	0.271714
hsa-miR-494-5p	Endogenous1	-1.89	0.211134	-1.46	0.440221	-1.69	0.271714
hsa-miR-495-3p	Endogenous1	3.01	0.511971	-14.75	0.184281	-1.71	0.745896
hsa-miR-495-5p	Endogenous1	2.56	0.221292	1.63	0.543734	2.12	0.266667
hsa-miR-496	Endogenous1	-1.89	0.211134	-1.46	0.440221	-1.69	0.271714
hsa-miR-497-5p	Endogenous1	3.76	0.365981	-5.63	0.261741	1.27	0.879239
hsa-miR-498	Endogenous1	-1.89	0.211134	-1.46	0.440221	-1.69	0.271714
hsa-miR-499a-3p	Endogenous1	1.06	0.956003	1.71	0.643696	1.37	0.772971
hsa-miR-499a-5p	Endogenous1	1.07	0.96028	-1.14	0.931632	-1.12	0.935537
hsa-miR-499b-3p	Endogenous1	-1.89	0.211134	-1.37	0.502158	-1.02	0.974015
hsa-miR-499b-5p	Endogenous1	-2.46	0.306711	-1.97	0.415899	-1.31	0.749685
hsa-miR-5001-3p	Endogenous1	-1.89	0.211134	-1.46	0.440221	-1.69	0.271714
hsa-miR-5001-5p	Endogenous1	1.63	0.421101	-1.24	0.598168	-1.68	0.219961
hsa-miR-500a-5p+hsa-miR-501-5p	Endogenous1	1.56	0.788884	-9.5	0.253378	-2.3	0.651735
hsa-miR-501-3p	Endogenous1	-1.89	0.211134	-1.46	0.440221	-1.69	0.271714
hsa-miR-5010-3p	Endogenous1	-1.63	0.4884	-1.2	0.862883	-1.95	0.418968
hsa-miR-5010-5p	Endogenous1	-3.35	0.303489	2.73	0.394204	-1.01	0.99159
hsa-miR-502-3p	Endogenous1	-1.32	0.832344	1.75	0.693782	-1.44	0.778682
hsa-miR-502-5p	Endogenous1	-1.89	0.211134	-1.46	0.440221	-1.69	0.271714
hsa-miR-503-3p	Endogenous1	-2.88	0.247111	-3	0.226926	-3.84	0.169317
hsa-miR-503-5p	Endogenous1	1.35	0.876784	-49.27	0.136561	-3.67	0.528346
hsa-miR-504-3p	Endogenous1	-1.73	0.255918	2.11	0.443563	1.47	0.57902
hsa-miR-504-5p	Endogenous1	-1.37	0.76379	-4.12	0.245673	-2.14	0.572098
hsa-miR-505-3p	Endogenous1	1.43	0.853079	-11.25	0.293173	-2.8	0.634598
hsa-miR-506-3p	Endogenous1	-1.96	0.57034	-2.92	0.393425	-1.31	0.809515
hsa-miR-506-5p	Endogenous1	1.43	0.665162	-1.06	0.953886	-1.28	0.800549
hsa-miR-507	Endogenous1	-2.95	0.210896	1.44	0.7231	-2.3	0.295199
hsa-miR-508-3p	Endogenous1	-1.89	0.211134	-1.46	0.440221	-1.69	0.271714
hsa-miR-508-5p	Endogenous1	-2.2	0.243402	-1.47	0.525952	-1.96	0.294861
hsa-miR-509-3-5p	Endogenous1	-1.73	0.255918	1.22	0.76674	-1.69	0.271714
hsa-miR-509-3p	Endogenous1	-3.19	0.221043	-2.46	0.306349	-2.85	0.25274
hsa-miR-509-5p	Endogenous1	-2.72	0.399766	1.23	0.792099	1.46	0.661281
hsa-miR-510-3p	Endogenous1	-1.63	0.611683	1.4	0.605419	-1.17	0.885275
hsa-miR-510-5p	Endogenous1	-1.89	0.211134	-1.46	0.440221	-1.16	0.74921
hsa-miR-511-5p	Endogenous1	-2.1	0.475348	-1.71	0.61212	-1.37	0.754694
hsa-miR-512-3p	Endogenous1	-1.89	0.211134	-1.46	0.440221	-1.69	0.271714
hsa-miR-512-5p	Endogenous1	-1.96	0.55005	-1.38	0.779744	-4.71	0.237949
hsa-miR-513a-3p	Endogenous1	-2.22	0.395394	-1.48	0.663204	-1.9	0.487414
hsa-miR-513a-5p	Endogenous1	-2.89	0.286919	-2.23	0.39497	-2.42	0.353465
hsa-miR-513b-5p	Endogenous1	1.55	0.736357	-1.14	0.928414	1.02	0.986322
hsa-miR-513c-3p	Endogenous1	-1.89	0.211134	-1.46	0.440221	-1.69	0.271714
hsa-miR-513c-5p	Endogenous1	-1.19	0.782801	1.51	0.555161	2.62	0.363325
hsa-miR-514a-3p	Endogenous1	-2.27	0.220448	-1.83	0.344494	-1.83	0.512605
hsa-miR-514a-5p	Endogenous1	-1.7	0.685907	-5.72	0.2789	-1.18	0.89365
hsa-miR-514b-3p	Endogenous1	-2.58	0.0217616	1.18	0.873042	-1.62	0.0620759
hsa-miR-514b-5p	Endogenous1	2.32	0.525434	1.22	0.875	1.03	0.979567
hsa-miR-515-3p	Endogenous1	-1.74	0.640331	-2.58	0.396183	-1.69	0.645492
hsa-miR-515-5p	Endogenous1	2.32	0.413386	1.26	0.853556	2.7	0.483101
hsa-miR-516a-3p+hsa-miR-516b-3p	Endogenous1	-2.38	0.502611	-1.32	0.829618	-2.32	0.5027
hsa-miR-516a-5p	Endogenous1	-2.89	0.286919	-1.93	0.472114	-1.14	0.888577
hsa-miR-516b-5p	Endogenous1	-2.35	0.424506	1.04	0.973109	1.53	0.696801
hsa-miR-517a-3p	Endogenous1	-2.03	0.571902	-2.82	0.470497	-2.3	0.568334
hsa-miR-517b-3p	Endogenous1	-1.89	0.211134	-1.46	0.440221	1.37	0.651025
hsa-miR-517c-3p+hsa-miR-519a-3p	Endogenous1	-1.98	0.48565	1.73	0.487499	1.59	0.544461
hsa-miR-518b	Endogenous1	1.63	0.763621	-9.91	0.233813	-2.3	0.669299
hsa-miR-518c-3p	Endogenous1	-1.27	0.680725	1.12	0.89913	2.1	0.368647
hsa-miR-518d-3p	Endogenous1	-3.49	0.197667	-2	0.540958	1.29	0.739397
hsa-miR-518e-3p	Endogenous1	-2.59	0.271818	-1.81	0.470964	-1.62	0.56552
hsa-miR-518f-3p	Endogenous1	-2.73	0.519989	-3.6	0.451327	-1.96	0.634777
hsa-miR-5196-3p+hsa-miR-6732-3p	Endogenous1	-1.64	0.773712	-12.21	0.190775	-3.84	0.411721
hsa-miR-5196-5p	Endogenous1	1.25	0.782446	-1.07	0.894603	2.19	0.351171
hsa-miR-519b-3p	Endogenous1	-2.16	0.218601	-1.07	0.942114	1.67	0.425559
hsa-miR-519b-5p+hsa-miR-519c-5p+hsa-miR-523-5p+hsa-miR-518e-5p+hsa-miR-522-5p+hsa-miR-519a-5p	Endogenous1	-2.89	0.286919	-1.68	0.604588	-1.32	0.795688
hsa-miR-519c-3p	Endogenous1	-1.1	0.840528	2.05	0.193134	-1.13	0.80991
hsa-miR-519d-3p	Endogenous1	-2.2	0.243402	-1.36	0.6064	-1.96	0.294861
hsa-miR-519e-3p	Endogenous1	1.65	0.364389	2.01	0.494397	1.25	0.808276
hsa-miR-520a-3p	Endogenous1	-1.89	0.211134	1.2	0.850887	-1.69	0.271714
hsa-miR-520a-5p	Endogenous1	-1.09	0.940922	-1.74	0.636206	-1.41	0.765761
hsa-miR-520b	Endogenous1	-1.89	0.211134	-1.46	0.440221	-1.24	0.667666
hsa-miR-520c-3p	Endogenous1	-3.9	0.325431	-2.85	0.468059	-2.4	0.514297
hsa-miR-520d-3p	Endogenous1	-1.68	0.698517	-3.19	0.398868	-1.51	0.751485
hsa-miR-520d-5p+hsa-miR-527+hsa-miR-518a-5p	Endogenous1	-1.29	0.842777	-2.19	0.448763	-1.49	0.686792
hsa-miR-520e	Endogenous1	-2.01	0.282456	-1.69	0.404084	-1.96	0.294861
hsa-miR-520f-3p	Endogenous1	-1.89	0.211134	-1.46	0.440221	1.21	0.826551
hsa-miR-520g-3p	Endogenous1	-2.72	0.02072	-1.24	0.832066	-2.32	0.0296902
hsa-miR-520h	Endogenous1	1.1	0.928271	1.01	0.996126	-1.01	0.987595
hsa-miR-521	Endogenous1	-2.2	0.243402	-1.11	0.871225	-1.45	0.560541
hsa-miR-522-3p	Endogenous1	-9.53	0.201362	-7.06	0.242916	-2.07	0.625269
hsa-miR-523-3p	Endogenous1	-1.69	0.405093	1.24	0.857595	1.15	0.879744
hsa-miR-524-3p	Endogenous1	-1.39	0.441287	1.6	0.575293	1.27	0.804307
hsa-miR-525-3p	Endogenous1	1.55	0.66415	1.4	0.799194	-1.45	0.797225
hsa-miR-525-5p	Endogenous1	-1.08	0.853909	-1.11	0.876372	-1.07	0.953703
hsa-miR-526a+hsa-miR-518c-5p+hsa-miR-518d-5p	Endogenous1	-1.84	0.406126	-1.33	0.703676	-1.5	0.575078
hsa-miR-526b-5p	Endogenous1	-2.7	0.514753	-2.2	0.594064	1.49	0.792094
hsa-miR-532-3p	Endogenous1	1.95	0.0534552	1.89	0.153425	2.86	0.240833
hsa-miR-532-5p	Endogenous1	1.8	0.579854	-1.51	0.757591	1.32	0.822519
hsa-miR-539-3p	Endogenous1	-1.2	0.76709	-1.46	0.440221	-1.02	0.974015
hsa-miR-539-5p	Endogenous1	-2.63	0.598838	-2.45	0.637164	-1.04	0.981843
hsa-miR-541-3p	Endogenous1	-1.89	0.211134	-1.46	0.440221	-1.69	0.271714
hsa-miR-542-3p	Endogenous1	-1.12	0.945171	-2.74	0.546715	-1.22	0.899486
hsa-miR-542-5p	Endogenous1	2.07	0.336436	-3.96	0.126149	-1.87	0.432684
hsa-miR-543	Endogenous1	1.58	0.725555	-6.22	0.21506	-2.64	0.462609
hsa-miR-544a	Endogenous1	-1.27	0.680725	-1.32	0.606758	1.18	0.823393
hsa-miR-545-3p	Endogenous1	1.45	0.772842	-2.93	0.462513	-1.11	0.938094
hsa-miR-548a-3p	Endogenous1	-1.89	0.211134	-1.46	0.440221	-1.69	0.271714
hsa-miR-548a-5p	Endogenous1	-1	0.999483	1.14	0.8829	-1.2	0.868231
hsa-miR-548aa+hsa-miR-548t-3p	Endogenous1	-1.89	0.211134	-1.46	0.440221	-1.69	0.271714
hsa-miR-548ad-3p	Endogenous1	-1.89	0.211134	-1.24	0.675333	1.54	0.347613
hsa-miR-548ah-5p	Endogenous1	-1.96	0.39895	-2.21	0.334197	-1.53	0.585026
hsa-miR-548ai+hsa-miR-570-5p	Endogenous1	-1.73	0.255918	-1.46	0.440221	-1.69	0.271714
hsa-miR-548ak	Endogenous1	-2.59	0.271818	-1.02	0.985037	1.2	0.839121
hsa-miR-548al	Endogenous1	1.07	0.950012	-1.08	0.955307	1.39	0.766199
hsa-miR-548ar-3p	Endogenous1	-3.53	0.150133	-1.58	0.426954	-1.36	0.756699
hsa-miR-548ar-5p	Endogenous1	-1.89	0.211134	-1.46	0.440221	-1.36	0.486485
hsa-miR-548b-3p	Endogenous1	-1.89	0.211134	-1.46	0.440221	-1.69	0.271714
hsa-miR-548c-5p+hsa-miR-548o-5p+hsa-miR-548am-5p	Endogenous1	-1.89	0.211134	-1.46	0.440221	-1.69	0.271714
hsa-miR-548d-3p	Endogenous1	-1.89	0.211134	-1.46	0.440221	-1.69	0.271714
hsa-miR-548d-5p	Endogenous1	1.23	0.876386	-1.9	0.648793	-1.43	0.786508
hsa-miR-548e-3p	Endogenous1	-1.89	0.211134	-1.46	0.440221	-1.24	0.667666
hsa-miR-548e-5p	Endogenous1	-3.08	0.118994	-1.33	0.511729	-1.41	0.570089
hsa-miR-548g-3p	Endogenous1	-1.5	0.686533	2.51	0.326815	3.14	0.252757
hsa-miR-548h-5p	Endogenous1	-1.89	0.211134	-1.46	0.440221	-1.69	0.271714
hsa-miR-548i	Endogenous1	-1.56	0.497576	-1.69	0.404084	-1.58	0.445399
hsa-miR-548j-3p	Endogenous1	-1.57	0.723835	1.48	0.721618	2.05	0.483348
hsa-miR-548j-5p	Endogenous1	-2.89	0.286919	-2.02	0.45604	-1.26	0.801261
hsa-miR-548k	Endogenous1	-2.77	0.399289	-1.8	0.633105	-1.18	0.870727
hsa-miR-548l	Endogenous1	-1.79	0.46495	-1.31	0.736617	1.26	0.796048
hsa-miR-548m	Endogenous1	-1.77	0.614765	-2.66	0.409862	-1.68	0.644402
hsa-miR-548n	Endogenous1	4.64	0.0727026	2.84	0.364878	5.19	0.0226281
hsa-miR-548o-3p+hsa-miR-548ah-3p+hsa-miR-548av-3p	Endogenous1	-1.17	0.862519	1.1	0.922805	3.04	0.114057
hsa-miR-548q	Endogenous1	-1.89	0.211134	-1.46	0.440221	-1.69	0.271714
hsa-miR-548v	Endogenous1	1.01	0.988698	1.09	0.909829	1.85	0.273592
hsa-miR-548y	Endogenous1	-1.03	0.982015	1.06	0.955509	1.42	0.773026
hsa-miR-548z+hsa-miR-548h-3p	Endogenous1	-5.75	0.251684	-2.1	0.60189	1.74	0.68509
hsa-miR-549a	Endogenous1	-1.89	0.211134	-1.46	0.440221	-1.11	0.85746
hsa-miR-550a-5p	Endogenous1	-1.89	0.211134	-1.46	0.440221	-1.69	0.271714
hsa-miR-551a	Endogenous1	-2.55	0.420013	-5.72	0.174432	-1.09	0.952122
hsa-miR-551b-3p	Endogenous1	-2.78	0.4125	-3.7	0.279318	-1.06	0.942536
hsa-miR-552-3p	Endogenous1	-4.92	0.0585177	-1.93	0.320687	-3.65	0.0994661
hsa-miR-553	Endogenous1	-1.89	0.211134	1.2	0.850887	2.06	0.180216
hsa-miR-554	Endogenous1	-1.89	0.211134	-1.46	0.440221	-1.69	0.271714
hsa-miR-555	Endogenous1	-3.54	0.308723	-2.73	0.396841	-1.55	0.72977
hsa-miR-556-3p	Endogenous1	-1.16	0.818396	3.49	0.164123	1.45	0.72957
hsa-miR-556-5p	Endogenous1	-1.89	0.211134	-1.46	0.440221	-1.69	0.271714
hsa-miR-561-3p	Endogenous1	-2.02	0.475104	-1.27	0.858537	-1.28	0.83859
hsa-miR-561-5p	Endogenous1	1.14	0.874344	-1.94	0.323756	2.03	0.525618
hsa-miR-562	Endogenous1	-2.2	0.243402	1.09	0.934514	-1.29	0.708733
hsa-miR-563	Endogenous1	-1.98	0.358212	-1.13	0.826926	-2.14	0.478051
hsa-miR-564	Endogenous1	-1.23	0.830058	-2.15	0.379004	-1.55	0.53295
hsa-miR-566	Endogenous1	-1.83	0.407461	-2.16	0.29643	1.14	0.890483
hsa-miR-567	Endogenous1	1.03	0.973519	3.41	0.150196	2.94	0.282707
hsa-miR-568	Endogenous1	-2.26	0.359939	-1.15	0.897314	1.52	0.709443
hsa-miR-570-3p	Endogenous1	-1.89	0.211134	-1.46	0.440221	-1.69	0.271714
hsa-miR-571	Endogenous1	-1.89	0.211134	-1.46	0.440221	-1.69	0.271714
hsa-miR-572	Endogenous1	1.93	0.262176	1.14	0.83074	1.16	0.856928
hsa-miR-573	Endogenous1	-1.89	0.211134	-1.46	0.440221	1.05	0.949733
hsa-miR-574-3p	Endogenous1	2.31	0.644754	-9.85	0.272786	-2.34	0.643784
hsa-miR-574-5p	Endogenous1	1.81	0.756072	-7.07	0.366595	-1.64	0.804235
hsa-miR-575	Endogenous1	-1.3	0.766074	-1.34	0.763448	1.57	0.611068
hsa-miR-576-3p	Endogenous1	-2.2	0.243402	-1.28	0.753332	-1.58	0.445399
hsa-miR-576-5p	Endogenous1	-1.52	0.57908	-1.25	0.785845	1.18	0.857013
hsa-miR-577	Endogenous1	-2.26	0.589663	-6.6	0.222386	-3.2	0.405317
hsa-miR-578	Endogenous1	1.03	0.959815	-1.75	0.651816	1.15	0.889431
hsa-miR-579-3p	Endogenous1	-1.89	0.211134	-1.46	0.440221	-1.69	0.271714
hsa-miR-579-5p	Endogenous1	2.19	0.19058	1.49	0.600964	-1.03	0.957779
hsa-miR-580-3p	Endogenous1	-1.62	0.302181	-1.1	0.894421	2.24	0.363444
hsa-miR-582-3p	Endogenous1	-2.33	0.356697	-4.75	0.0303527	-3.82	0.21068
hsa-miR-582-5p	Endogenous1	-2	0.603667	-2.48	0.491137	-1.83	0.637029
hsa-miR-584-3p	Endogenous1	-1.12	0.813253	-1.07	0.887085	1.03	0.95188
hsa-miR-584-5p	Endogenous1	-1.58	0.375641	1.34	0.554455	1.29	0.784976
hsa-miR-585-3p	Endogenous1	1.01	0.994926	1.59	0.356925	-1.13	0.846077
hsa-miR-587	Endogenous1	2.03	0.227962	-1.77	0.321199	-1.01	0.99299
hsa-miR-589-5p	Endogenous1	1.42	0.650655	-1.02	0.97399	-1.96	0.294861
hsa-miR-590-3p	Endogenous1	-2.89	0.286919	-2.23	0.39497	-2.58	0.326987
hsa-miR-590-5p	Endogenous1	-2.01	0.6847	-13.01	0.146397	-6.16	0.265055
hsa-miR-591	Endogenous1	-1.05	0.95014	1.01	0.993823	-1.53	0.624347
hsa-miR-592	Endogenous1	-1.18	0.903882	-4.65	0.316334	-1.44	0.784953
hsa-miR-593-3p	Endogenous1	-1.93	0.328466	-9.91	0.0283475	-3.19	0.127781
hsa-miR-595	Endogenous1	-2.64	0.31807	1.07	0.964818	1.37	0.769896
hsa-miR-596	Endogenous1	-2.13	0.443709	-2.04	0.611365	1.02	0.988217
hsa-miR-597-5p	Endogenous1	-5.66	0.25573	-1.27	0.853253	-3.05	0.439685
hsa-miR-598-3p	Endogenous1	1.67	0.721195	-1.92	0.660894	-1.28	0.867488
hsa-miR-599	Endogenous1	-1.89	0.211134	-1.46	0.440221	-1.69	0.271714
hsa-miR-600	Endogenous1	-1.89	0.211134	-1.37	0.502158	-1.07	0.919272
hsa-miR-601	Endogenous1	-1.89	0.211134	-1.46	0.440221	1.05	0.949733
hsa-miR-603	Endogenous1	-1.89	0.211134	-1.46	0.440221	-1.69	0.271714
hsa-miR-604	Endogenous1	-1.89	0.211134	-1.46	0.440221	-1.69	0.271714
hsa-miR-605-5p	Endogenous1	-1.69	0.405093	-1.01	0.99033	-1.11	0.893592
hsa-miR-606	Endogenous1	-1.62	0.302181	1.24	0.73004	1.87	0.437647
hsa-miR-607	Endogenous1	-1.95	0.329855	-1.69	0.446426	-1.4	0.650044
hsa-miR-608	Endogenous1	2.64	0.473822	2.19	0.569735	3.08	0.414806
hsa-miR-610	Endogenous1	-1.63	0.610117	-1.81	0.652201	-1.37	0.730963
hsa-miR-612	Endogenous1	-2.29	0.264967	-1.49	0.533903	-1.48	0.537652
hsa-miR-613	Endogenous1	-1.16	0.818396	1.73	0.605186	-1.24	0.667666
hsa-miR-614	Endogenous1	-2.2	0.243402	-1.54	0.515285	-1.09	0.908392
hsa-miR-615-3p	Endogenous1	-2.33	0.0425892	1.14	0.85872	-1.26	0.700395
hsa-miR-615-5p	Endogenous1	1.25	0.825945	1.4	0.646755	1.51	0.712063
hsa-miR-616-3p	Endogenous1	-3.1	0.252461	-2.62	0.309954	-2.48	0.330845
hsa-miR-617	Endogenous1	-1.44	0.673557	-2.05	0.302488	1.17	0.84126
hsa-miR-619-3p	Endogenous1	-1.03	0.967899	1.27	0.816784	-1	0.997494
hsa-miR-620	Endogenous1	-1.89	0.211134	1.03	0.954677	-1.69	0.271714
hsa-miR-624-3p	Endogenous1	-2.05	0.446086	-1.75	0.540664	-2.25	0.386424
hsa-miR-625-5p	Endogenous1	1.31	0.775694	-1.33	0.767725	1.44	0.682469
hsa-miR-626	Endogenous1	1.34	0.629457	-2.59	0.32121	1.71	0.487153
hsa-miR-627-3p	Endogenous1	1.17	0.814718	1.82	0.397307	1.35	0.679539
hsa-miR-627-5p	Endogenous1	-1.89	0.211134	-1.46	0.440221	-1.69	0.271714
hsa-miR-628-3p	Endogenous1	-2.09	0.454366	-2.33	0.451184	-1.23	0.835407
hsa-miR-628-5p	Endogenous1	-1.04	0.978827	-9.4	0.191423	-6.2	0.295451
hsa-miR-629-5p	Endogenous1	-4.27	0.309828	-1.07	0.958003	1.37	0.798311
hsa-miR-630	Endogenous1	-3.35	0.303489	-1.47	0.72016	-1.6	0.651932
hsa-miR-631	Endogenous1	-1.89	0.211134	1.2	0.850887	1.35	0.604313
hsa-miR-637	Endogenous1	-1.89	0.211134	-1.46	0.440221	-1.69	0.271714
hsa-miR-638	Endogenous1	-1.89	0.211134	-1.46	0.440221	1.18	0.823393
hsa-miR-639	Endogenous1	-5.9	0.0593356	-1.84	0.5561	-3.45	0.131623
hsa-miR-640	Endogenous1	1.26	0.813768	-1.39	0.719617	1.02	0.987534
hsa-miR-641	Endogenous1	-1.89	0.211134	-1.46	0.440221	-1.69	0.271714
hsa-miR-642a-3p	Endogenous1	-3.14	0.2966	-2.42	0.395499	-2.8	0.334058
hsa-miR-642a-5p	Endogenous1	1.06	0.971941	-2.79	0.548002	-1.53	0.809936
hsa-miR-643	Endogenous1	-1.89	0.211134	-1.37	0.502158	-1.69	0.271714
hsa-miR-644a	Endogenous1	1.15	0.865646	1.43	0.701566	1.05	0.953193
hsa-miR-648	Endogenous1	-2.58	0.0217616	-1.5	0.536736	-1.02	0.982198
hsa-miR-649	Endogenous1	-1.27	0.680725	1.34	0.791194	1.71	0.575906
hsa-miR-650	Endogenous1	-1.35	0.801097	-1.1	0.940351	1.25	0.860545
hsa-miR-6503-3p	Endogenous1	1.51	0.564514	1.42	0.583526	2.11	0.222436
hsa-miR-6503-5p	Endogenous1	1.11	0.9295	1.58	0.598317	3.36	0.239981
hsa-miR-651-3p	Endogenous1	-1.89	0.211134	-1.26	0.613108	-1.69	0.271714
hsa-miR-651-5p	Endogenous1	1.58	0.663667	-1.11	0.923764	-1.42	0.765687
hsa-miR-6511a-3p	Endogenous1	1.52	0.481779	-1.07	0.894603	-1.69	0.271714
hsa-miR-6511a-5p	Endogenous1	-1.89	0.211134	-1.46	0.440221	-1.24	0.667666
hsa-miR-652-3p	Endogenous1	-2.59	0.271818	-2	0.395509	-1.87	0.430637
hsa-miR-652-5p	Endogenous1	-1.89	0.211134	-1.46	0.440221	-1.69	0.271714
hsa-miR-654-3p	Endogenous1	-1.08	0.926411	1.22	0.856473	1.39	0.670536
hsa-miR-654-5p	Endogenous1	-1.24	0.791751	-1.69	0.404084	-1.45	0.560541
hsa-miR-655-3p	Endogenous1	-2.88	0.352625	-1.78	0.584862	-1.53	0.72243
hsa-miR-656-3p	Endogenous1	1.35	0.782914	-4.46	0.242313	-1.92	0.628576
hsa-miR-660-3p	Endogenous1	1.09	0.944104	-1.84	0.609804	1.24	0.857877
hsa-miR-660-5p	Endogenous1	1.58	0.811803	-15.94	0.232181	-3.68	0.548651
hsa-miR-661	Endogenous1	-1.82	0.61549	1.43	0.690706	-1.72	0.633116
hsa-miR-663a	Endogenous1	-1.89	0.211134	1.4	0.546389	-1.69	0.271714
hsa-miR-664a-3p	Endogenous1	-1.14	0.929461	-5.3	0.334887	-2.04	0.65186
hsa-miR-664b-3p	Endogenous1	-3.35	0.311754	-2.18	0.501259	-1.43	0.787461
hsa-miR-664b-5p	Endogenous1	-1.89	0.211134	-1.46	0.440221	-1.69	0.271714
hsa-miR-665	Endogenous1	1.11	0.859228	2	0.450287	1.04	0.957074
hsa-miR-671-3p	Endogenous1	-2.01	0.282456	-1.54	0.515285	-1.24	0.751579
hsa-miR-671-5p	Endogenous1	-1.21	0.848534	3.39	0.240691	1.08	0.93941
hsa-miR-6720-3p	Endogenous1	-1.89	0.211134	-1.1	0.894421	1.21	0.736657
hsa-miR-6721-5p	Endogenous1	-1.79	0.519203	-2.11	0.498812	-1.34	0.764087
hsa-miR-6724-5p	Endogenous1	-2.88	0.331108	-2.01	0.49128	-2.07	0.507084
hsa-miR-675-5p	Endogenous1	-2.2	0.243402	-1.69	0.404084	-1.96	0.294861
hsa-miR-7-5p	Endogenous1	1.7	0.737829	-7.68	0.24056	-1.43	0.83211
hsa-miR-708-5p	Endogenous1	-1.89	0.211134	-1.46	0.440221	-1.69	0.271714
hsa-miR-744-5p	Endogenous1	-1.16	0.818396	1.54	0.730097	1.11	0.896359
hsa-miR-758-3p+hsa-miR-411-3p	Endogenous1	-1.42	0.779167	-4.65	0.252564	-1.91	0.579
hsa-miR-758-5p	Endogenous1	-3.56	0.26992	-2.49	0.39887	-1.92	0.547865
hsa-miR-760	Endogenous1	-2.95	0.210896	-1.37	0.692811	1.22	0.834791
hsa-miR-761	Endogenous1	-2.77	0.335023	-1.72	0.589689	-4.03	0.209371
hsa-miR-764	Endogenous1	-4.21	0.13318	1.38	0.665431	1.33	0.683182
hsa-miR-765	Endogenous1	2.19	0.25682	1.96	0.557101	1.08	0.937139
hsa-miR-766-3p	Endogenous1	-1.89	0.211134	-1.46	0.440221	-1.69	0.271714
hsa-miR-766-5p	Endogenous1	-1.89	0.211134	-1.46	0.440221	-1.69	0.271714
hsa-miR-767-3p	Endogenous1	-1.23	0.659692	-1.32	0.606758	1.38	0.752139
hsa-miR-767-5p	Endogenous1	-1.56	0.653004	1.56	0.566094	-1.53	0.612173
hsa-miR-769-3p	Endogenous1	-1.55	0.331714	1.41	0.639971	1.04	0.957074
hsa-miR-769-5p	Endogenous1	-1.16	0.924457	-5.39	0.325978	-1.72	0.727572
hsa-miR-770-5p	Endogenous1	-1.89	0.211134	1.4	0.669353	-1.69	0.271714
hsa-miR-802	Endogenous1	1.24	0.781608	1.41	0.708267	1.57	0.580305
hsa-miR-873-3p	Endogenous1	2.18	0.510348	-1.29	0.852226	3.41	0.338139
hsa-miR-873-5p	Endogenous1	-1.73	0.255918	-1.32	0.606758	-1.36	0.486485
hsa-miR-874-3p	Endogenous1	-1.89	0.211134	-1.46	0.440221	-1.69	0.271714
hsa-miR-874-5p	Endogenous1	-1.07	0.938352	-2.51	0.458378	-2.51	0.446477
hsa-miR-875-3p	Endogenous1	-1.89	0.211134	-1.1	0.894421	-1.69	0.271714
hsa-miR-876-3p	Endogenous1	-1.23	0.765064	-1.02	0.985707	-1.27	0.756989
hsa-miR-876-5p	Endogenous1	-1.89	0.211134	-1.46	0.440221	-1.69	0.271714
hsa-miR-877-5p	Endogenous1	-1.03	0.966268	-2.65	0.25892	-2.02	0.412688
hsa-miR-885-3p	Endogenous1	-4.08	0.238217	-2.37	0.44629	-2.4	0.423634
hsa-miR-885-5p	Endogenous1	-1.89	0.211134	-1.46	0.440221	-1.69	0.271714
hsa-miR-887-3p	Endogenous1	-1.52	0.669488	1.98	0.582922	1.01	0.994761
hsa-miR-887-5p	Endogenous1	-2.28	0.2055	-1.31	0.738647	-1.22	0.775144
hsa-miR-888-5p	Endogenous1	-2.16	0.513394	-2.07	0.521812	-1.39	0.765659
hsa-miR-889-3p	Endogenous1	-1.08	0.956445	-7.44	0.258739	-5.4	0.340022
hsa-miR-890	Endogenous1	1.06	0.954919	2.22	0.548022	2.78	0.439661
hsa-miR-891a-5p	Endogenous1	-1.84	0.407405	-1.51	0.59752	-2.32	0.351352
hsa-miR-891b	Endogenous1	-3.77	0.352761	-7.63	0.197997	-4.27	0.331908
hsa-miR-892a	Endogenous1	-1.36	0.755843	1.03	0.980972	2.47	0.226622
hsa-miR-892b	Endogenous1	-1.89	0.211134	-1.46	0.440221	-1.69	0.271714
hsa-miR-9-5p	Endogenous1	5.69	0.445839	-30.44	0.202703	-1.58	0.856565
hsa-miR-922	Endogenous1	-1.25	0.666858	3.44	0.0380914	2.1	0.246083
hsa-miR-924	Endogenous1	-1.89	0.211134	-1.46	0.440221	-1.69	0.271714
hsa-miR-92a-1-5p	Endogenous1	-1.43	0.474487	-1.46	0.440221	-1.69	0.271714
hsa-miR-92a-3p	Endogenous1	1.33	0.850223	-5.33	0.325961	1.03	0.986215
hsa-miR-92b-3p	Endogenous1	1.65	0.47584	-1.16	0.845778	-1.15	0.891678
hsa-miR-93-5p	Endogenous1	1.05	0.97869	-23.86	0.152326	-2.94	0.595418
hsa-miR-933	Endogenous1	2.22	0.454022	2.38	0.392049	4.25	0.0655826
hsa-miR-934	Endogenous1	-4.15	0.321625	-2.31	0.526805	-1.75	0.696882
hsa-miR-935	Endogenous1	1.62	0.577302	1.57	0.683623	1.33	0.780851
hsa-miR-936	Endogenous1	-1.47	0.770976	1.4	0.796629	-1.04	0.972952
hsa-miR-937-3p	Endogenous1	-1.13	0.83573	-1.12	0.806607	-1.17	0.786727
hsa-miR-939-5p	Endogenous1	-1.96	0.520637	-1.21	0.830903	-1.87	0.523851
hsa-miR-940	Endogenous1	-1.89	0.211134	-1.46	0.440221	-1.11	0.85746
hsa-miR-941	Endogenous1	-1.01	0.987031	-1.46	0.440221	-1.18	0.776938
hsa-miR-942-3p	Endogenous1	-1.89	0.211134	1.29	0.759851	1.34	0.766134
hsa-miR-942-5p	Endogenous1	-1.7	0.662592	-1.6	0.653014	-1.57	0.649554
hsa-miR-944	Endogenous1	-1.16	0.818396	-1.46	0.440221	-1.69	0.271714
hsa-miR-95-3p	Endogenous1	-1.1	0.938669	-6.24	0.241378	-1.21	0.881139
hsa-miR-96-5p	Endogenous1	-1.98	0.504051	-3.81	0.242128	-4.05	0.294463
hsa-miR-98-3p	Endogenous1	-1.89	0.211134	2.73	0.220252	3.07	0.185659
hsa-miR-98-5p	Endogenous1	2.61	0.586495	-153.43	0.0734251	-4.49	0.563883
hsa-miR-99a-5p	Endogenous1	4.37	0.535051	-35.99	0.216065	-1.77	0.822107
hsa-miR-99b-5p	Endogenous1	1.42	0.861894	-9.29	0.335531	-2.21	0.707531
ACTB	Housekeeping	1.13	0.674026	1.22	0.499908	1	0.989907
B2M	Housekeeping	1.03	0.948747	-1.42	0.489963	-1.21	0.736342
GAPDH	Housekeeping	-1.23	0.409991	-1.11	0.719168	1.02	0.964375
RPL19	Housekeeping	1.17	0.407686	1.17	0.630683	1.07	0.861632
RPLP0	Housekeeping	-1.11	0.584048	1.11	0.559366	1.11	0.595103

## Sheet: S2. (A)
2	qRT-PCR Raw Data (Relative Expression of miRNAs to U6)
		1. miR-9-5p
	Sample	Cт	Cт Mean	Cт SD	ΔCт	ΔCт Mean	ΔCт SD	2-ΔCт	2-ΔCт Mean	2-ΔCт SD	p-value
	PN1	25.2099	25.1736	0.0619717	5.3857	5.39911	0.0606949	23.9189	23.7116	0.99071	0.879178
		25.2088			5.46539			22.6337
		25.102			5.34624			24.5823
	PN2	25.3083	25.3198	0.0850111	5.26383	5.4981	0.203889	26.0273	22.2776	3.25992
		25.2411			5.59502			20.6886
		25.41			5.63545			20.1168
	PN3	25.7306	25.5223	0.19653	6.36601	6.18424	0.171184	12.1238	13.8159	1.6167
		25.4961			6.1606			13.979
		25.3401			6.0261			15.3448
	AVR.		25.3385	0.188201		5.69382	0.394672		19.3193	5.00034
	PC24	32.9325	33.3217	0.338085	7.31769	7.83657	0.471533	6.2684	4.53793	1.54186
		33.4909			7.95313			4.03524
		33.5418			8.23889			3.31015
	PC26	26.1451	26.1607	0.119227	4.35777	4.29749	0.161758	48.7733	51.0713	5.86882
		26.2869			4.42046			46.6992
		26.05			4.11425			57.7414
	PC30	31.9459	31.7533	0.272954	11.6279	11.6072	0.160456	0.315975	0.321885	0.0361204
		31.4409			11.4373			0.360596
		31.873			11.7562			0.289084
	AVR.		30.4119	3.26771		7.91374	3.17652		4.14694	24.5771
		2. miR-136-5p
	Sample	Cт	Cт Mean	Cт SD	ΔCт	ΔCт Mean	ΔCт SD	2-ΔCт	2-ΔCт Mean	2-ΔCт SD	p-value
	PN1	27.2731	27.1485	0.109112	7.44892	7.3741	0.068658	5.72336	6.03253	0.284908	0.0736391
		27.1028			7.3594			6.08976
		27.0697			7.31399			6.28449
	PN2	25.9329	25.8867	0.0456424	5.8884	6.06496	0.17549	16.8816	15.0109	1.82459
		25.8855			6.23936			13.2362
		25.8417			6.06712			14.9147
	PN3	26.8472	26.7674	0.0775524	7.48267	7.42936	0.0522152	5.59105	5.80404	0.209783
		26.7626			7.42709			5.81061
		26.6923			7.37831			6.01046
	AVR.		26.6009	0.564937		6.95614	0.675921		8.05365	4.64135
	PC24	28.1329	28.1039	0.0844084	2.51808	2.61869	0.216336	174.575	164.005	23.5049
		28.0088			2.47098			180.369
		28.17			2.86701			137.071
	PC26	27.9597	27.9433	0.0142121	6.17232	6.08014	0.0875022	13.8658	14.7988	0.89243
		27.9363			6.06986			14.8864
		27.934			5.99823			15.6442
	PC30	32.2858	32.1512	0.145931	11.9678	12.005	0.147913	0.249655	0.244134	0.0245412
		32.1716			12.168			0.217302
		31.9961			11.8793			0.265444
	AVR.		29.3995	2.06668		6.90128	4.11312		8.36578	79.3714
		3. miR-148a-3p
	Sample	Cт	Cт Mean	Cт SD	ΔCт	ΔCт Mean	ΔCт SD	2-ΔCт	2-ΔCт Mean	2-ΔCт SD	p-value
	PN1	21.9005	21.7686	0.134657	2.07638	1.99412	0.096452	237.108	251.397	16.9923	0.0080302
		21.6314			1.88797			270.187
		21.7738			2.01802			246.897
	PN2	22.079	22.0811	0.0532791	2.03452	2.2594	0.19506	244.089	210.166	29.4148
		22.0289			2.3828			191.736
		22.1354			2.36088			194.672
	PN3	21.1165	20.9933	0.1086	1.75191	1.65527	0.0892802	296.909	317.881	19.4925
		20.9113			1.57585			335.445
		20.9521			1.63806			321.288
	AVR.		21.6143	0.49341		1.9696	0.287404		255.324	50.9784
	PC24	28.1172	28.0122	0.0913088	2.50245	2.52707	0.111042	176.477	173.831	13.2062
		27.9682			2.4304			185.513
		27.9513			2.64836			159.502
	PC26	23.9287	23.9078	0.0400214	2.14137	2.04458	0.109407	226.664	242.861	18.604
		23.933			2.06649			238.74
		23.8616			1.92587			263.181
	PC30	28.0239	28.0203	0.107617	7.70593	7.8742	0.219513	4.78944	4.29432	0.627755
		28.1261			8.1225			3.58827
		27.9109			7.79417			4.50527
	AVR.		26.6468	2.05556		4.14862	2.80522		56.3822	106.925
							Relatvie fold change		0.220826
		4. miR-190a-5p
	Sample	Cт	Cт Mean	Cт SD	ΔCт	ΔCт Mean	ΔCт SD	2-ΔCт	2-ΔCт Mean	2-ΔCт SD	p-value
	PN1	26.6297	26.4464	0.158989	6.80558	6.67191	0.116548	8.93954	9.82844	0.775794	5.94211e-09
		26.362			6.61859			10.1767
		26.3473			6.59157			10.3691
	PN2	26.4553	26.3954	0.0619656	6.41074	6.57363	0.171825	11.7537	10.5482	1.24332
		26.3993			6.75318			9.27024
		26.3315			6.55697			10.6207
	PN3	25.9581	25.8633	0.113856	6.59349	6.5253	0.0902403	10.3553	10.8708	0.689877
		25.8949			6.55945			10.6025
		25.737			6.42297			11.6545
	AVR.		26.235	0.297854		6.59028	0.13038		10.3783	0.932458
	PC24	33.6876	33.6361	0.214148	8.07287	8.15094	0.333792	3.71385	3.57967	0.791085
		33.4009			7.8631			4.29508
		33.8198			8.51685			2.73007
	PC26	30.0105	29.8481	0.142357	8.2231	7.98492	0.20664	3.34657	3.9736	0.544262
		29.7446			7.87817			4.25045
		29.7893			7.85349			4.32379
	PC30	33.245	33.1845	0.118729	12.927	13.0384	0.189538	0.128408	0.119533	0.0150679
		33.2608			13.2572			0.102136
		33.0477			12.9309			0.128056
	AVR.		32.2229	1.79738		9.72475	2.4958		1.18184	1.89823
							Relatvie fold change		0.113876
		5. miR-199b-5p
	Sample	Cт	Cт Mean	Cт SD	ΔCт	ΔCт Mean	ΔCт SD	2-ΔCт	2-ΔCт Mean	2-ΔCт SD	p-value
	PN1	21.9316	21.8306	0.0887838	2.10745	2.05618	0.0493185	232.057	240.545	8.20417	2.75171e-07
		21.7954			2.05202			241.146
		21.7648			2.00907			248.433
	PN2	21.8416	21.7456	0.0839296	1.79711	1.92392	0.121754	287.751	264.165	22.398
		21.686			2.03989			243.183
		21.7093			1.93478			261.562
	PN3	20.9179	20.7743	0.125507	1.5533	1.4363	0.101541	340.73	370.117	25.5103
		20.7198			1.38437			383.058
		20.6853			1.37122			386.564
	AVR.		21.4502	0.515731		1.80547	0.294674		286.089	62.2616
	PC24	28.6031	28.4372	0.156076	2.98832	2.95206	0.0645318	126.016	129.311	5.8567
		28.4153			2.87755			136.073
		28.2932			2.9903			125.843
	PC26	26.9748	26.9281	0.050943	5.18742	5.06486	0.124767	27.443	29.9508	2.59356
		26.9357			5.06918			29.7869
		26.8738			4.93799			32.6224
	PC30	27.32	27.212	0.107606	7.002	7.06586	0.122923	7.8017	7.48164	0.621293
		27.2112			7.20757			6.76557
		27.1048			6.98802			7.87763
	AVR.		27.5258	0.701468		5.02759	1.78399		30.658	56.2388
							Relatvie fold change		0.107163
		6. miR-382-5p
	Sample	Cт	Cт Mean	Cт SD	ΔCт	ΔCт Mean	ΔCт SD	2-ΔCт	2-ΔCт Mean	2-ΔCт SD	p-value
	PN1	27.8784	27.7103	0.15358	8.05424	7.93588	0.111081	3.7621	4.09181	0.312187	0.0641265
		27.5773			7.8339			4.38288
		27.6752			7.91949			4.13043
	PN2	27.4144	27.3497	0.0562406	7.36992	7.52803	0.153419	6.04551	5.4385	0.580452
		27.3224			7.67628			4.88886
		27.3124			7.53788			5.38112
	PN3	27.5892	27.5177	0.0627964	8.22463	8.17967	0.0389328	3.34303	3.44968	0.0923573
		27.4924			8.15697			3.50355
		27.4715			8.15742			3.50244
	AVR.		27.5259	0.179134		7.88119	0.301082		4.24155	0.93989
	PC24	29.9746	29.9249	0.0838917	4.35983	4.43971	0.201664	48.7036	46.3737	6.23742
		29.828			4.29023			51.1107
		29.972			4.66908			39.3067
	PC26	28.8999	28.7257	0.155992	7.11248	6.86253	0.228952	7.22652	8.66464	1.33642
		28.6786			6.81213			8.89906
		28.5987			6.66298			9.86834
	PC30	30.9444	30.9485	0.00403073	10.6264	10.8024	0.163254	0.632617	0.562377	0.0644691
		30.9524			10.9489			0.505902
		30.9487			10.8319			0.548611
	AVR.		29.8664	0.967552		7.36821	2.78648		6.05268	21.4117
		7. miR-597-5p
	Sample	Cт	Cт Mean	Cт SD	ΔCт	ΔCт Mean	ΔCт SD	2-ΔCт	2-ΔCт Mean	2-ΔCт SD	p-value
	PN1	34.5322	34.2855	0.281325	14.7081	14.511	0.254739	0.037362	0.0432883	0.00791771	0.0817349
		34.3451			14.6016			0.0402224
		33.9791			14.2234			0.0522805
	PN2	33.4457	33.742	0.269631	13.4012	13.9203	0.449915	0.092436	0.0667375	0.0222665
		33.8073			14.1611			0.0545847
		33.973			14.1984			0.0531917
	PN3	35.3186	34.7071	0.530186	15.954	15.3691	0.506804	0.0157529	0.0245452	0.00762014
		34.4269			15.0914			0.0286435
		34.3758			15.0617			0.0292392
	AVR.		34.2448	0.532737		14.6001	0.727376		0.040265	0.0221203
	PC24	34.4105	33.9863	0.556701	8.79573	8.5011	0.394464	2.2502	2.83237	0.816315
		34.1924			8.65461			2.48144
		33.3559			8.05296			3.76547
	PC26	38.4784	38.3076	0.287016	16.6911	16.4444	0.300484	0.00945122	0.0113811	0.00245285
		37.9762			16.1097			0.0141414
		38.468			16.5323			0.0105508
	PC30	36.2026	36.0666	0.423422	15.8846	15.9205	0.351474	0.016529	0.0164403	0.0039033
		35.5919			15.5883			0.0202985
		36.4052			16.2885			0.0124934
	AVR.		36.1201	1.9094		13.622	3.85933		0.0793191	1.46715
		8. miR-655-3p
	Sample	Cт	Cт Mean	Cт SD	ΔCт	ΔCт Mean	ΔCт SD	2-ΔCт	2-ΔCт Mean	2-ΔCт SD	p-value
	PN1	28.8624	28.582	0.245043	9.03828	8.80752	0.203518	1.90198	2.24638	0.305152	1.61174e-12
		28.474			8.73063			2.35407
		28.4094			8.65365			2.48308
	PN2	28.6823	28.6539	0.0271277	8.63775	8.8322	0.176441	2.51061	2.20514	0.274934
		28.6282			8.98208			1.97754
		28.6513			8.87679			2.12726
	PN3	28.0119	28.0516	0.111892	8.6473	8.71353	0.13048	2.49403	2.38853	0.21023
		27.9649			8.62944			2.52511
		28.1779			8.86384			2.14644
	AVR.		28.4291	0.315431		8.78442	0.15917		2.26792	0.245292
	PC24	36.2676	36.9451	1.06888	10.6529	11.4599	1.0444	0.621115	0.412475	0.235753
		38.1773			12.6395			0.156724
		36.3903			11.0874			0.459587
	PC26	33.3451	33.2756	0.188791	11.5577	11.4123	0.247908	0.331733	0.370634	0.0664958
		33.4197			11.5533			0.332755
		33.0619			11.1261			0.447414
	PC30	33.3625	33.2128	0.13121	13.0445	13.0667	0.0795303	0.118366	0.116671	0.00636037
		33.1586			13.155			0.109636
		33.1174			13.0007			0.122013
	AVR.		34.4778	1.92969		11.9797	0.977119		0.247608	0.18501
							Relatvie fold change		0.109179
		R. RNU6
	Sample	Cт	Cт Mean	Cт SD
	PN1	19.8242	19.7744	0.0434976
		19.7434
		19.7558
	PN2	20.0445	19.8217	0.203347
		19.6461
		19.7745
	PN3	19.3646	19.338	0.0253583
		19.3355
		19.314
	PC24	25.6148	25.4852	0.16244
		25.5378
		25.3029
	PC26	21.7874	21.8632	0.0742482
		21.8665
		21.9358
	PC30	20.318	20.1461	0.159251
		20.0036
		20.1168

## Sheet: S2. (B)
3	qRT-PCR Raw Data (Relative Expression of miRNAs to U6)
		1. miR-9-5p
	Sample	Cт	Cт Mean	Cт SD	ΔCт	ΔCт Mean	ΔCт SD	2-ΔCт	2-ΔCт Mean	2-ΔCт SD	p-value
	PN1	25.2099	25.1736	0.0619717	5.3857	5.39911	0.0606949	23.9189	23.7116	0.99071	0.100613
		25.2088			5.46539			22.6337
		25.102			5.34624			24.5823
	PN2	25.3083	25.3198	0.0850111	5.26383	5.4981	0.203889	26.0273	22.2776	3.25992
		25.2411			5.59502			20.6886
		25.41			5.63545			20.1168
	PN3	25.7306	25.5223	0.19653	6.36601	6.18424	0.171184	12.1238	13.8159	1.6167
		25.4961			6.1606			13.979
		25.3401			6.0261			15.3448
	PN4	26.3779	26.2866	0.0827936	7.87204	7.83344	0.0425193	4.26853	4.38556	0.129693
		26.2162			7.84041			4.36316
		26.2658			7.78787			4.525
	AVR.		25.5756	0.459205		6.22872	1.02471		13.3342	8.22457
	PC1	24.9724	24.9509	0.0223698	5.96514	6.06848	0.090963	16.0072	14.9206	0.954845
		24.9526			6.10391			14.5392
		24.9278			6.1364			14.2154
	PC2	23.5056	23.51	0.0282708	6.22513	6.23292	0.11999	13.3674	13.326	1.10291
		23.4841			6.35662			12.203
		23.5401			6.11702			14.4076
	PC3	23.9057	23.7936	0.0973734	5.83893	5.78904	0.0482622	17.4705	18.0921	0.604063
		23.7451			5.78558			18.1288
		23.7299			5.7426			18.677
	PC4	23.551	23.4675	0.0874202	5.39902	5.3031	0.177415	23.6992	25.4593	3.23279
		23.475			5.41191			23.4884
		23.3766			5.09837			29.1902
	PC5	22.279	22.3037	0.0223996	3.79683	3.9707	0.152307	71.9518	64.0238	6.93153
		22.3226			4.03477			61.0117
		22.3095			4.08051			59.1079
	PC6	27.2187	27.1837	0.12875	9.57536	9.67648	0.125369	1.31078	1.22509	0.104392
		27.041			9.63734			1.25566
		27.2913			9.81675			1.10882
	PC7	20.2207	20.0062	0.18625	2.18674	1.98353	0.18118	219.648	254.178	30.9821
		19.8853			1.83885			279.544
		19.9126			1.92499			263.342
	PC8	25.1126	24.9876	0.108264	6.76006	6.51604	0.213208	9.2261	11.004	1.55717
		24.9259			6.42224			11.6604
		24.9242			6.36581			12.1255
	PC9	23.9602	23.9138	0.0787592	2.92141	3.0475	0.118123	131.999	121.224	10.0072
		23.9584			3.06551			119.451
		23.8229			3.15558			112.221
	PC10	22.661	22.6573	0.0211658	5.47544	5.62848	0.228074	22.4765	20.3781	3.06901
		22.6345			5.89061			16.8558
		22.6764			5.5194			21.802
	PC11	22.2378	22.0771	0.154188	3.71918	3.6618	0.089754	75.9304	79.1145	5.00546
		22.063			3.70785			76.5291
		21.9304			3.55836			84.8839
	PC12	24.5588	24.5425	0.0510625	6.77673	6.81698	0.0608537	9.12012	8.87441	0.369816
		24.5834			6.88699			8.44909
		24.4852			6.78723			9.05402
	PC13	22.0224	21.9688	0.0485204	3.93901	3.90754	0.062287	65.1988	66.6784	2.91294
		21.9562			3.94781			64.8021
		21.9279			3.8358			70.0341
	PC14	24.9201	24.9191	0.0657845	6.00645	6.04729	0.0501621	15.5553	15.1272	0.522113
		24.8528			6.03214			15.2808
		24.9844			6.10328			14.5455
	PC15	24.6807	24.539	0.129875	7.41999	7.37751	0.0670725	5.83929	6.01817	0.283388
		24.5108			7.41234			5.87032
		24.4256			7.30018			6.34491
	PC17	23.6148	23.5819	0.0312123	3.11642	3.00075	0.158029	115.309	125.444	14.0965
		23.5783			3.06515			119.481
		23.5527			2.8207			141.542
	PC18	24.7731	24.6702	0.0933137	5.16505	5.20814	0.0518095	27.8717	27.0632	0.964995
		24.6463			5.26563			25.9949
		24.5911			5.19374			27.323
	PC19	25.1835	25.1451	0.0562337	4.80644	4.82647	0.0201213	35.7368	35.2465	0.491523
		25.0806			4.82628			35.2489
		25.1713			4.84669			34.7538
	PC20	27.4963	27.314	0.157909	8.03956	7.94393	0.0901628	3.80059	4.06632	0.252424
		27.2178			7.86047			4.3029
		27.228			7.93176			4.09547
	PC21	25.1289	25.0424	0.0758645	5.73584	5.60555	0.113258	18.7647	20.5798	1.57868
		25.011			5.55017			21.3419
		24.9873			5.53063			21.6328
	PC23	33.5121	33.5247	0.0164658	7.84648	8.01819	0.148751	4.34486	3.87127	0.410243
		33.5186			8.10032			3.64384
		33.5433			8.10776			3.62512
	PC25	24.972	24.9461	0.0235213	6.24632	6.19877	0.18153	13.1725	13.687	1.75773
		24.9261			5.99819			15.6446
		24.9403			6.35178			12.244
	PC27	26.7919	26.807	0.0179163	5.53646	5.6391	0.105503	21.5457	20.1018	1.46485
		26.8025			5.63358			20.1429
		26.8268			5.74725			18.6168
	PC28	23.2642	23.2398	0.0386343	3.19611	3.2106	0.0126648	109.113	108.025	0.950508
		23.1953			3.21616			107.607
		23.26			3.21954			107.355
	PC29	25.6468	25.3942	0.218784	6.63172	6.42494	0.185257	10.0845	11.7015	1.45956
		25.2709			6.27409			12.9214
		25.2649			6.36901			12.0986
	AVR.		24.5795	2.46807		5.52415	1.77417		21.7302	57.0814
		2. miR-136-5p
	Sample	Cт	Cт Mean	Cт SD	ΔCт	ΔCт Mean	ΔCт SD	2-ΔCт	2-ΔCт Mean	2-ΔCт SD	p-value
	PN1	27.2731	27.1485	0.109112	7.44892	7.3741	0.068658	5.72336	6.03253	0.284908	0.643082
		27.1028			7.3594			6.08976
		27.0697			7.31399			6.28449
	PN2	25.9329	25.8867	0.0456424	5.8884	6.06496	0.17549	16.8816	15.0109	1.82459
		25.8855			6.23936			13.2362
		25.8417			6.06712			14.9147
	PN3	26.8472	26.7674	0.0775524	7.48267	7.42936	0.0522152	5.59105	5.80404	0.209783
		26.7626			7.42709			5.81061
		26.6923			7.37831			6.01046
	PN4	28.263	28.2042	0.068933	9.75723	9.75096	0.00717582	1.15553	1.16057	0.00577699
		28.1283			9.7525			1.15932
		28.2211			9.74313			1.16688
	AVR.		27.0017	0.871071		7.65484	1.38924		4.96206	5.29859
	PC1	32.404	32.3011	0.138561	13.3967	13.4186	0.136064	0.0927228	0.0915941	0.00853286
		32.1435			13.2949			0.0995064
		32.3557			13.5643			0.082553
	PC2	30.296	30.2386	0.0511109	13.0155	12.9616	0.166434	0.120765	0.125929	0.0148612
		30.2219			13.0944			0.114338
		30.198			12.7749			0.142683
	PC3	29.1753	29.1072	0.122455	11.1086	11.1027	0.121334	0.452885	0.455815	0.0384179
		29.1805			11.2209			0.418946
		28.9658			10.9785			0.495614
	PC4	30.9326	30.9112	0.0344785	12.7806	12.7467	0.139779	0.142122	0.145955	0.0143559
		30.9296			12.8665			0.133905
		30.8714			12.5932			0.161839
	PC5	31.9578	31.5849	0.383588	13.4756	13.2519	0.262861	0.0877866	0.103673	0.0193986
		31.6056			13.3177			0.0979406
		31.1914			12.9624			0.125292
	PC6	29.0957	29.0605	0.0347883	11.4524	11.5533	0.0893867	0.356846	0.333165	0.0209275
		29.0262			11.6225			0.317158
		29.0596			11.5851			0.32549
	PC7	29.3392	29.2094	0.112932	11.3053	11.1867	0.104393	0.395154	0.42974	0.0305162
		29.155			11.1086			0.452872
		29.1339			11.1463			0.441195
	PC8	28.6444	28.6413	0.0202363	10.2919	10.1697	0.106073	0.79767	0.869715	0.0625631
		28.6196			10.116			0.901123
		28.6597			10.1013			0.910352
	PC9	27.4326	27.2188	0.185332	6.39381	6.3525	0.126619	11.8925	12.2697	1.09622
		27.1033			6.21039			13.5048
		27.1206			6.45331			11.412
	PC10	29.2844	29.2203	0.0555238	12.0988	12.1915	0.219464	0.227983	0.215403	0.0313625
		29.186			12.4421			0.179704
		29.1905			12.0336			0.238523
	PC11	30.8971	30.8437	0.0869782	12.3785	12.4284	0.0928429	0.187808	0.181659	0.0114671
		30.8907			12.5356			0.168429
		30.7433			12.3713			0.188741
	PC12	28.3037	28.3521	0.0439354	10.5216	10.6266	0.0917561	0.680264	0.633374	0.0409364
		28.3633			10.6669			0.615105
		28.3894			10.6914			0.604753
	PC13	28.9261	28.8061	0.116927	10.8427	10.7449	0.12766	0.544526	0.584284	0.0527207
		28.7998			10.7914			0.564238
		28.6925			10.6005			0.644087
	PC14	30.4086	30.4762	0.0803734	11.4949	11.6043	0.127497	0.346489	0.322006	0.0280014
		30.5651			11.7443			0.291475
		30.4549			11.5738			0.328054
	PC15	29.175	29.0895	0.0775219	11.9143	11.928	0.0382941	0.259078	0.256693	0.00677053
		29.0697			11.9713			0.249053
		29.0238			11.8984			0.261949
	PC17	28.4469	28.4408	0.0369366	7.9485	7.85963	0.10598	4.04821	4.31325	0.320939
		28.4012			7.88804			4.22145
		28.4743			7.74234			4.67008
	PC18	30.5061	30.4185	0.0776432	10.8981	10.9564	0.0511703	0.524028	0.503464	0.0180166
		30.3583			10.9777			0.495904
		30.391			10.9936			0.490458
	PC19	32.0912	32.1296	0.141772	11.7141	11.8109	0.19221	0.297643	0.279939	0.035797
		32.2866			12.0323			0.23874
		32.0109			11.6863			0.303434
	PC20	29.4788	29.567	0.0874129	10.0221	10.1969	0.151853	0.96174	0.855207	0.0924991
		29.6536			10.2962			0.795293
		29.5686			10.2723			0.808589
	PC21	27.3305	27.2042	0.147924	7.93745	7.76734	0.178988	4.07932	4.61354	0.576122
		27.0415			7.58064			5.22398
		27.2406			7.78395			4.53732
	PC23	26.8851	26.717	0.15325	1.21946	1.21047	0.0568863	429.443	432.353	17.1221
		26.6806			1.26232			416.872
		26.5852			1.14962			450.743
	PC25	30.1161	30.0446	0.0670135	11.3904	11.2972	0.165203	0.372517	0.399157	0.0471093
		30.0343			11.1064			0.453551
		29.9832			11.3947			0.371404
	PC27	32.2199	32.2719	0.116395	10.9645	11.104	0.136074	0.50045	0.455687	0.0430889
		32.4052			11.2364			0.414495
		32.1906			11.111			0.452117
	PC28	30.5769	30.6731	0.0945802	10.5088	10.6439	0.117788	0.686323	0.62641	0.0522125
		30.6764			10.6973			0.602284
		30.766			10.7255			0.590623
	PC29	29.3876	29.1788	0.216289	10.3725	10.2095	0.156771	0.754319	0.847873	0.0913641
		29.193			10.1961			0.852423
		28.9558			10.0599			0.936877
	AVR.		29.6683	1.51806		10.613	2.54872		0.638532	85.1326
		3. miR-148a-3p
	Sample	Cт	Cт Mean	Cт SD	ΔCт	ΔCт Mean	ΔCт SD	2-ΔCт	2-ΔCт Mean	2-ΔCт SD	p-value
	PN1	21.9005	21.7686	0.134657	2.07638	1.99412	0.096452	237.108	251.397	16.9923	0.0805631
		21.6314			1.88797			270.187
		21.7738			2.01802			246.897
	PN2	22.079	22.0811	0.0532791	2.03452	2.2594	0.19506	244.089	210.166	29.4148
		22.0289			2.3828			191.736
		22.1354			2.36088			194.672
	PN3	21.1165	20.9933	0.1086	1.75191	1.65527	0.0892802	296.909	317.881	19.4925
		20.9113			1.57585			335.445
		20.9521			1.63806			321.288
	PN4	20.1559	20.058	0.0865014	1.65005	1.60479	0.0787819	318.63	329.114	18.2461
		20.0263			1.6505			318.529
		19.9918			1.51382			350.183
	AVR.		21.2252	0.820894		1.8784	0.297362		271.986	54.156
	PC1	23.8346	23.8195	0.0372768	4.82733	4.93706	0.114324	35.2232	32.7117	2.57851
		23.777			4.92837			32.8407
		23.8469			5.05548			30.071
	PC2	20.4353	20.3892	0.148867	3.15483	3.11221	0.0371732	112.28	115.672	2.95938
		20.2228			3.0953			117.009
		20.5096			3.08649			117.727
	PC3	19.861	19.6574	0.181011	1.79427	1.65289	0.134193	288.317	318.914	29.3923
		19.5967			1.63713			321.495
		19.5146			1.52728			346.931
	PC4	21.1955	21.135	0.0895337	3.04355	2.9706	0.190947	121.283	128.335	17.4858
		21.1774			3.11432			115.477
		21.0322			2.75393			148.246
	PC5	20.988	20.9692	0.0244187	2.50589	2.63618	0.113398	176.057	161.189	12.9311
		20.9779			2.69008			154.955
		20.9416			2.71258			152.557
	PC6	19.4807	19.4106	0.0702443	1.83735	1.90342	0.0572161	279.836	267.451	10.7254
		19.3402			1.93652			261.246
		19.4109			1.93638			261.271
	PC7	18.6537	18.3997	0.222337	0.619745	0.376988	0.219066	650.786	775.859	114.068
		18.2404			0.194033			874.159
		18.3048			0.317186			802.634
	PC8	20.5943	20.5066	0.0759941	2.24175	2.0351	0.180487	211.43	245.237	29.5854
		20.4588			1.95519			257.886
		20.4668			1.90836			266.396
	PC9	21.9701	21.9108	0.0714139	0.931259	1.04446	0.116605	524.4	485.88	39.1061
		21.9308			1.03793			487.027
		21.8315			1.16419			446.213
	PC10	19.1152	19.1188	0.0226615	1.92967	2.09002	0.230584	262.489	236.825	36.084
		19.0982			2.35427			195.566
		19.1431			1.98611			252.418
	PC11	20.6795	20.5695	0.113252	2.16084	2.15423	0.0699627	223.626	224.83	10.9368
		20.5758			2.22065			214.545
		20.4532			2.08119			236.319
	PC12	19.8609	19.7864	0.0697246	2.07881	2.06092	0.0314306	236.71	239.702	5.25457
		19.7757			2.07932			236.626
		19.7226			2.02462			245.769
	PC13	21.5487	21.4644	0.0950021	3.46533	3.4031	0.115866	90.5379	94.7354	7.7749
		21.483			3.47455			89.9613
		21.3615			3.26942			103.707
	PC14	21.3976	21.3568	0.0360712	2.48389	2.48494	0.0374894	178.761	178.672	4.63999
		21.3437			2.52295			173.987
		21.3291			2.44799			183.266
	PC15	20.6003	20.4427	0.137534	3.33962	3.28123	0.059105	98.7813	102.919	4.21862
		20.3811			3.28263			102.761
		20.3468			3.22143			107.214
	PC17	23.7379	23.5871	0.131903	3.23959	3.00591	0.239164	105.873	125.636	20.8692
		23.5297			3.01653			123.576
		23.4936			2.76161			147.459
	PC18	21.9718	21.9505	0.0212831	2.36374	2.48847	0.109682	194.287	178.543	13.8192
		21.9505			2.56984			168.423
		21.9292			2.53185			172.917
	PC19	23.5619	23.5442	0.0215419	3.18486	3.22559	0.0405476	109.967	106.934	3.00569
		23.5203			3.26595			103.956
		23.5505			3.22594			106.879
	PC20	22.9924	22.9837	0.0573225	3.5357	3.61355	0.110367	86.2279	81.8555	6.12908
		22.9225			3.5651			84.4888
		23.0361			3.73986			74.8499
	PC21	21.3139	21.3333	0.0954982	1.92078	1.89639	0.0943042	264.111	269	17.7807
		21.437			1.9761			254.176
		21.2489			1.79229			288.714
	PC23	28.247	28.1816	0.0605838	2.58131	2.67509	0.0866422	167.089	156.762	9.48855
		28.1704			2.75216			148.429
		28.1274			2.69181			154.77
	PC25	22.91	22.7237	0.161763	4.18431	3.9763	0.239925	55.0043	64.1328	10.9079
		22.6417			3.71383			76.2127
		22.6193			4.03076			61.1814
	PC27	24.2162	24.0961	0.11999	2.96081	2.92812	0.0320824	128.442	131.407	2.92014
		24.0958			2.92689			131.498
		23.9762			2.89668			134.28
	PC28	23.3147	23.1856	0.122518	3.24662	3.15641	0.0805283	105.358	112.273	6.18906
		23.0709			3.09179			117.294
		23.1713			3.1308			114.166
	PC29	22.5826	22.4719	0.101398	3.56753	3.50264	0.100594	84.3464	88.3716	6.27805
		22.3836			3.38676			95.6055
		22.4495			3.55363			85.1628
	AVR.		21.7198	2.04127		2.66447	0.948763		157.73	154.893
		4. miR-190a-5p
	Sample	Cт	Cт Mean	Cт SD	ΔCт	ΔCт Mean	ΔCт SD	2-ΔCт	2-ΔCт Mean	2-ΔCт SD	p-value
	PN1	26.6297	26.4464	0.158989	6.80558	6.67191	0.116548	8.93954	9.82844	0.775794	8.90041e-07
		26.362			6.61859			10.1767
		26.3473			6.59157			10.3691
	PN2	26.4553	26.3954	0.0619656	6.41074	6.57363	0.171825	11.7537	10.5482	1.24332
		26.3993			6.75318			9.27024
		26.3315			6.55697			10.6207
	PN3	25.9581	25.8633	0.113856	6.59349	6.5253	0.0902403	10.3553	10.8708	0.689877
		25.8949			6.55945			10.6025
		25.737			6.42297			11.6545
	PN4	27.1556	27.1246	0.0891076	8.64977	8.67141	0.038743	2.48977	2.4533	0.0653646
		27.0241			8.64831			2.49229
		27.1941			8.71614			2.37784
	AVR.		26.4574	0.477323		7.11056	0.947912		7.23614	3.68804
	PC1	27.9098	27.7293	0.156393	8.90255	8.84684	0.0579312	2.08962	2.17305	0.0874309
		27.6356			8.78691			2.26399
		27.6424			8.85107			2.16553
	PC2	27.2394	27.1705	0.0600059	9.95889	9.89351	0.164562	1.00479	1.05602	0.12364
		27.1428			10.0153			0.966233
		27.1294			9.70631			1.19704
	PC3	26.6187	26.5503	0.0746015	8.55194	8.54571	0.0594667	2.66445	2.67751	0.110694
		26.5614			8.60182			2.57392
		26.4707			8.48338			2.79415
	PC4	28.5682	28.6365	0.225799	10.4162	10.4721	0.120471	0.731825	0.705631	0.057517
		28.4528			10.3897			0.745389
		28.8886			10.6104			0.63968
	PC5	28.1638	27.9883	0.156008	9.68166	9.65533	0.0235514	1.21767	1.24021	0.0201758
		27.9359			9.64805			1.24637
		27.8653			9.63627			1.25659
	PC6	26.3074	26.219	0.090604	8.66408	8.71178	0.0934368	2.4652	2.38831	0.151742
		26.2231			8.81944			2.21352
		26.1263			8.65183			2.48622
	PC7	26.6141	26.527	0.0754226	8.58012	8.50437	0.070762	2.61292	2.75599	0.134357
		26.4864			8.43998			2.87948
		26.4806			8.493			2.77557
	PC8	27.3048	27.3894	0.0787039	8.95228	8.91787	0.0635473	2.01881	2.06889	0.0922517
		27.4604			8.95679			2.01251
		27.403			8.84454			2.17535
	PC9	26.9433	26.7238	0.192872	5.90452	5.85751	0.0898123	16.6941	17.2696	1.09344
		26.6468			5.75395			18.5306
		26.5814			5.91405			16.5841
	PC10	26.2097	26.1481	0.073356	9.02415	9.11928	0.269735	1.9207	1.81855	0.323708
		26.1676			9.42369			1.45609
		26.0669			8.90999			2.07886
	PC11	28.2824	28.2026	0.0802856	9.76375	9.78737	0.0534613	1.15032	1.13216	0.0415303
		28.2037			9.84857			1.08464
		28.1218			9.74978			1.16151
	PC12	25.8158	25.7573	0.0685674	8.03372	8.03181	0.0470783	3.81602	3.82241	0.12484
		25.7743			8.07791			3.70089
		25.6818			7.98381			3.95032
	PC13	26.263	26.1262	0.133422	8.17962	8.06486	0.143187	3.44898	3.74696	0.379245
		26.119			8.11057			3.61805
		25.9965			7.9044			4.17386
	PC14	28.9576	28.9584	0.0166155	10.044	10.0865	0.0595879	0.947261	0.920233	0.0375867
		28.9753			10.1546			0.87731
		28.9421			10.061			0.936129
	PC15	26.0843	26.0245	0.0700034	8.82357	8.863	0.0695717	2.20719	2.14934	0.102168
		26.0417			8.94333			2.03138
		25.9475			8.82209			2.20946
	PC17	27.8106	27.8106	0.113419	7.31229	7.22945	0.0718471	6.29191	6.66919	0.327291
		27.6972			7.18403			6.87687
		27.924			7.19204			6.8388
	PC18	28.2088	28.1678	0.0366949	8.60074	8.70569	0.0925425	2.57584	2.39843	0.156149
		28.1563			8.77557			2.28187
		28.1382			8.74077			2.33757
	PC19	28.8114	28.679	0.114809	8.43437	8.36032	0.071087	2.89068	3.04539	0.14952
		28.6083			8.35396			3.05638
		28.6172			8.29263			3.18912
	PC20	28.6963	28.6192	0.0670098	9.23957	9.24905	0.0367828	1.65429	1.64381	0.0417139
		28.5753			9.21793			1.67929
		28.5859			9.28964			1.59786
	PC21	27.1371	27.1355	0.00253829	7.74405	7.69863	0.0393308	4.66455	4.81491	0.130215
		27.1368			7.67592			4.8901
		27.1326			7.67593			4.89007
	PC23	34.5648	34.2215	0.344681	8.89916	8.71503	0.242763	2.09453	2.40279	0.418799
		34.2242			8.80601			2.23423
		33.8755			8.43992			2.8796
	PC25	28.4395	28.3742	0.0636583	9.71384	9.62686	0.159375	1.19081	1.27007	0.144452
		28.3708			9.44292			1.4368
		28.3123			9.72383			1.18259
	PC27	30.0674	30.0404	0.0603212	8.81203	8.87244	0.0534532	2.22493	2.13466	0.0797635
		30.0825			8.91359			2.07369
		29.9713			8.89172			2.10535
	PC28	28.3173	28.3235	0.0287466	8.24924	8.29428	0.0706637	3.28648	3.18799	0.153918
		28.3549			8.37572			3.01062
		28.2984			8.25787			3.26687
	PC29	27.88	27.8682	0.10707	8.86491	8.8989	0.159764	2.14484	2.10339	0.228632
		27.7557			8.75886			2.30845
		27.9688			9.07292			1.85686
	AVR.		27.8156	1.70414		8.76034	0.95812		2.30608	3.21048
							Relatvie fold change		0.318689
		5. miR-199b-5p
	Sample	Cт	Cт Mean	Cт SD	ΔCт	ΔCт Mean	ΔCт SD	2-ΔCт	2-ΔCт Mean	2-ΔCт SD	p-value
	PN1	21.9316	21.8306	0.0887838	2.10745	2.05618	0.0493185	232.057	240.545	8.20417	3.32413e-21
		21.7954			2.05202			241.146
		21.7648			2.00907			248.433
	PN2	21.8416	21.7456	0.0839296	1.79711	1.92392	0.121754	287.751	264.165	22.398
		21.686			2.03989			243.183
		21.7093			1.93478			261.562
	PN3	20.9179	20.7743	0.125507	1.5533	1.4363	0.101541	340.73	370.117	25.5103
		20.7198			1.38437			383.058
		20.6853			1.37122			386.564
	PN4	22.319	22.1754	0.128957	3.81314	3.72223	0.116164	71.1426	75.9359	6.21994
		22.138			3.76218			73.7006
		22.0693			3.59136			82.9646
	AVR.		21.6315	0.551403		2.28466	0.903936		205.234	111.089
	PC1	27.7027	27.6538	0.0439064	8.69539	8.77135	0.077149	2.41228	2.29073	0.122307
		27.6177			8.76902			2.29224
		27.641			8.84963			2.16768
	PC2	22.9225	22.9197	0.0529192	5.64197	5.64264	0.094961	20.0261	20.0458	1.31828
		22.8654			5.73793			18.7375
		22.9711			5.54801			21.3738
	PC3	23.0737	23.0278	0.0487114	5.00701	5.02322	0.0199365	31.0986	30.753	0.42375
		22.9767			5.01718			30.8801
		23.0328			5.04548			30.2802
	PC4	23.9405	23.9205	0.1021	5.78855	5.75607	0.21009	18.0915	18.6359	2.75058
		24.0111			5.94802			16.1982
		23.8099			5.53163			21.6179
	PC5	24.8114	24.8046	0.0672765	6.32928	6.47161	0.12887	12.4365	11.2984	1.02446
		24.8682			6.58038			10.4498
		24.7342			6.50517			11.009
	PC6	22.9528	22.9793	0.0509542	5.30949	5.47213	0.141216	25.2165	22.6014	2.26965
		22.9471			5.54338			21.4426
		23.038			5.56354			21.145
	PC7	23.259	23.1835	0.065527	5.22511	5.16083	0.0647101	26.7353	27.9722	1.25489
		23.1421			5.0957			29.2444
		23.1493			5.16168			27.9369
	PC8	22.5914	22.528	0.0551722	4.2389	4.05651	0.161373	52.962	60.3458	6.56053
		22.502			3.99835			62.5714
		22.4907			3.93227			65.504
	PC9	24.8641	24.8264	0.0392701	3.82534	3.96008	0.178121	70.5434	64.5738	7.71647
		24.7858			3.89287			67.3176
		24.8293			4.16203			55.8604
	PC10	22.6667	22.6242	0.073959	5.48115	5.59536	0.173383	22.3878	20.7812	2.40814
		22.5388			5.79487			18.0124
		22.667			5.51007			21.9434
	PC11	24.2508	24.0708	0.156119	5.73217	5.65553	0.0684793	18.8125	19.8537	0.932591
		23.9892			5.63405			20.1364
		23.9724			5.60036			20.6122
	PC12	22.3497	22.3175	0.0371412	4.56763	4.59202	0.033016	42.1703	41.4705	0.943508
		22.326			4.62959			40.3975
		22.2769			4.57884			41.8437
	PC13	22.1467	22.1502	0.055383	4.06333	4.08892	0.025942	59.8157	58.7703	1.05636
		22.0967			4.08824			58.7919
		22.2073			4.1152			57.7033
	PC14	25.7734	25.7179	0.107061	6.85974	6.8461	0.0665225	8.61019	8.69818	0.403678
		25.5945			6.77381			9.1386
		25.7859			6.90474			8.34576
	PC15	22.6602	22.5063	0.133592	5.39949	5.34484	0.0527879	23.6914	24.6171	0.898744
		22.4393			5.34089			24.6735
		22.4195			5.29414			25.4863
	PC17	23.798	23.8058	0.0963918	3.29963	3.22461	0.215593	101.558	107.794	16.6012
		23.9058			3.39267			95.215
		23.7135			2.98153			126.611
	PC18	25.2339	25.1237	0.1018	5.62586	5.66162	0.053512	20.251	19.7642	0.725387
		25.1038			5.72314			18.9305
		25.0333			5.63586			20.1112
	PC19	27.9486	28.0864	0.126577	7.57155	7.76778	0.186697	5.25697	4.61426	0.602175
		28.1975			7.9432			4.06311
		28.1132			7.7886			4.52271
	PC20	24.4994	24.3139	0.16964	5.04264	4.94375	0.0889221	30.3399	32.5334	1.97976
		24.2756			4.91823			33.0724
		24.1666			4.87037			34.1878
	PC21	23.3143	23.2848	0.0257174	3.92117	3.84796	0.0634133	66.0101	69.4905	3.0148
		23.2735			3.81263			71.1677
		23.2667			3.81008			71.2938
	PC23	28.014	29.685	2.91966	2.34833	4.17847	2.98303	196.373	123.426	103.411
		27.9846			2.56641			168.824
		33.0563			7.62068			5.08097
	PC25	24.93	24.6969	0.221034	6.20428	5.9495	0.234593	13.562	16.3223	2.58227
		24.6703			5.74244			18.679
		24.4903			5.90178			16.7258
	PC27	27.9336	27.8851	0.0608212	6.67821	6.7172	0.0948806	9.76471	9.5179	0.615003
		27.8169			6.64802			9.97116
		27.9049			6.82536			8.81783
	PC28	24.8348	24.7361	0.088603	4.76673	4.70685	0.0748344	36.7343	38.3256	2.00944
		24.71			4.73087			37.6588
		24.6635			4.62296			40.5837
	PC29	23.6631	23.5736	0.0778064	4.64801	4.60433	0.0578119	39.885	41.1331	1.66394
		23.5356			4.53877			43.0222
		23.5221			4.62621			40.4921
	AVR.		24.4169	2.04077		5.36157	1.3531		24.3224	34.6506
							Relatvie fold change		0.11851
		6. miR-382-5p
	Sample	Cт	Cт Mean	Cт SD	ΔCт	ΔCт Mean	ΔCт SD	2-ΔCт	2-ΔCт Mean	2-ΔCт SD	p-value
	PN1	27.8784	27.7103	0.15358	8.05424	7.93588	0.111081	3.7621	4.09181	0.312187	0.60851
		27.5773			7.8339			4.38288
		27.6752			7.91949			4.13043
	PN2	27.4144	27.3497	0.0562406	7.36992	7.52803	0.153419	6.04551	5.4385	0.580452
		27.3224			7.67628			4.88886
		27.3124			7.53788			5.38112
	PN3	27.5892	27.5177	0.0627964	8.22463	8.17967	0.0389328	3.34303	3.44968	0.0923573
		27.4924			8.15697			3.50355
		27.4715			8.15742			3.50244
	PN4	28.3369	28.3618	0.0239938	9.8311	9.90863	0.0784467	1.09785	1.04143	0.0565541
		28.3638			9.98797			0.984742
		28.3848			9.90683			1.04171
	AVR.		27.7349	0.407881		8.38805	0.952803		2.985	1.68839
	PC1	30.7027	30.598	0.11993	11.6954	11.7156	0.0528903	0.301535	0.297473	0.0108055
		30.6243			11.7756			0.285225
		30.4672			11.6758			0.30566
	PC2	29.5571	29.534	0.0200692	12.2766	12.257	0.150832	0.201549	0.205052	0.021621
		29.5246			12.3971			0.185396
		29.5205			12.0973			0.22821
	PC3	28.0915	28.0199	0.0624467	10.0247	10.0153	0.0230183	0.959976	0.966313	0.0154796
		27.9917			10.0322			0.955008
		27.9765			9.98912			0.983956
	PC4	29.3819	29.4064	0.108459	11.23	11.242	0.214203	0.416337	0.415918	0.0612025
		29.525			11.4619			0.354507
		29.3123			11.034			0.47691
	PC5	30.2542	30.128	0.141941	11.772	11.795	0.0643901	0.285937	0.281598	0.0124334
		30.1556			11.8678			0.267576
		29.9743			11.7453			0.29128
	PC6	28.6299	28.6652	0.0472991	10.9865	11.158	0.164831	0.492865	0.439539	0.0505026
		28.7189			11.3153			0.392436
		28.6468			11.1723			0.433315
	PC7	28.6048	28.5757	0.0688894	10.5709	10.5531	0.0947737	0.657431	0.666556	0.0441523
		28.4971			10.4507			0.714558
		28.6253			10.6377			0.62768
	PC8	27.6457	27.6067	0.0580515	9.29322	9.13516	0.155886	1.59391	1.78538	0.19219
		27.6343			9.13071			1.78395
		27.54			8.98154			1.97828
	PC9	25.4718	25.3085	0.141381	4.43296	4.4422	0.110665	46.2963	46.0908	3.51604
		25.2293			4.33644			49.4997
		25.2245			4.55719			42.4766
	PC10	28.8224	28.8249	0.0288895	11.6368	11.7961	0.272778	0.314032	0.284448	0.0505713
		28.8549			12.111			0.226055
		28.7973			11.6404			0.313256
	PC11	29.5478	29.5023	0.0892428	11.0292	11.087	0.10172	0.478502	0.460444	0.0317785
		29.5596			11.2045			0.423751
		29.3995			11.0274			0.479079
	PC12	27.6764	27.6069	0.0797803	9.89436	9.8814	0.052737	1.05075	1.06071	0.0390119
		27.5198			9.82339			1.10374
		27.6245			9.92644			1.02764
	PC13	26.6396	26.6359	0.0549635	8.55619	8.57461	0.0979972	2.65662	2.62693	0.176683
		26.6889			8.68051			2.43728
		26.5792			8.48713			2.78688
	PC14	29.5292	29.4472	0.139567	10.6155	10.5753	0.154324	0.637415	0.657943	0.0716287
		29.5263			10.7056			0.598819
		29.286			10.4049			0.737595
	PC15	28.0645	28.0341	0.0268529	10.8038	10.8726	0.0601464	0.559409	0.533655	0.0224886
		28.0135			10.915			0.517901
		28.0245			10.8991			0.523654
	PC17	28.6613	28.6774	0.0145411	8.16296	8.09621	0.120003	3.48903	3.6628	0.3116
		28.6811			8.16801			3.47684
		28.6896			7.95768			4.02254
	PC18	30.3001	30.1453	0.138526	10.692	10.6833	0.0440889	0.60449	0.608346	0.0186697
		30.103			10.7223			0.591905
		30.0329			10.6355			0.628642
	PC19	31.3507	31.2926	0.0513809	10.9736	10.974	0.0245439	0.497303	0.497226	0.00845716
		31.253			10.9987			0.48873
		31.2742			10.9496			0.505644
	PC20	29.4566	29.4942	0.0731424	9.99991	10.1241	0.113086	0.976621	0.89792	0.0712572
		29.5785			10.2211			0.837779
		29.4475			10.1513			0.879359
	PC21	28.2497	28.0851	0.149439	8.85663	8.64828	0.185447	2.15719	2.50584	0.312223
		28.0477			8.58689			2.6007
		27.958			8.50131			2.75963
	PC23	29.0248	28.9274	0.0928064	3.35916	3.42088	0.061241	97.4521	93.4275	3.96698
		28.8401			3.42183			93.3096
		28.9172			3.48163			89.5207
	PC25	29.8317	29.9024	0.0614747	11.106	11.155	0.180376	0.453693	0.44079	0.0536962
		29.9321			11.0042			0.486859
		29.9433			11.3548			0.381818
	PC27	30.9286	30.7991	0.120736	9.67315	9.63116	0.0965832	1.22487	1.26295	0.0859835
		30.6896			9.52069			1.3614
		30.7792			9.69964			1.20259
	PC28	29.9931	29.9006	0.0807356	9.92502	9.87132	0.0616315	1.02866	1.06832	0.0459336
		29.864			9.88491			1.05766
		29.8445			9.80402			1.11865
	PC29	28.8062	28.8415	0.0756213	9.79107	9.87219	0.138725	1.12874	1.07026	0.0999092
		28.7899			9.79312			1.12714
		28.9283			10.0324			0.954894
	AVR.		28.9584	1.317		9.90307	2.06651		1.04443	19.9921
		7. miR-597-5p
	Sample	Cт	Cт Mean	Cт SD	ΔCт	ΔCт Mean	ΔCт SD	2-ΔCт	2-ΔCт Mean	2-ΔCт SD	p-value
	PN1	34.5322	34.2855	0.281325	14.7081	14.511	0.254739	0.037362	0.0432883	0.00791771	0.505645
		34.3451			14.6016			0.0402224
		33.9791			14.2234			0.0522805
	PN2	33.4457	33.742	0.269631	13.4012	13.9203	0.449915	0.092436	0.0667375	0.0222665
		33.8073			14.1611			0.0545847
		33.973			14.1984			0.0531917
	PN3	35.3186	34.7071	0.530186	15.954	15.3691	0.506804	0.0157529	0.0245452	0.00762014
		34.4269			15.0914			0.0286435
		34.3758			15.0617			0.0292392
	PN4	33.6102	33.9638	0.365715	15.1044	15.5106	0.432155	0.0283866	0.0220562	0.0063756
		34.3406			15.9647			0.0156364
		33.9406			15.4626			0.0221456
	AVR.		34.1746	0.496871		14.8277	0.767008		0.034388	0.02167
	PC1	33.3738	33.2802	0.235205	14.3666	14.3977	0.194012	0.047341	0.0466057	0.00615443
		33.4541			14.6054			0.0401166
		33.0126			14.2212			0.0523594
	PC2	34.9682	35.0417	0.119835	17.6877	17.7647	0.258115	0.0047366	0.0045374	0.000778842
		35.18			18.0525			0.0036783
		34.9769			17.5538			0.00519729
	PC3	35.047	34.863	0.383025	16.9802	16.8585	0.350644	0.00773457	0.00858858	0.00218225
		34.4227			16.4632			0.0110687
		35.1193			17.132			0.00696248
	PC4	33.0829	33.0159	0.0586022	14.9309	14.8515	0.134835	0.0320142	0.0339268	0.00325139
		32.9908			14.9277			0.0320852
		32.9741			14.6958			0.037681
	PC5	33.9213	33.9923	0.110627	15.4391	15.6593	0.22603	0.0225092	0.0194808	0.00302511
		33.9359			15.6481			0.0194742
		34.1198			15.8908			0.016459
	PC6	34.0174	33.9573	0.279817	16.3741	16.4501	0.317249	0.0117735	0.0113455	0.00238724
		34.2021			16.7985			0.00877326
		33.6523			16.1778			0.0134898
	PC7	34.1532	34.0625	0.380515	16.1193	16.0399	0.407555	0.0140477	0.0152507	0.00442762
		33.6449			15.5985			0.0201555
		34.3895			16.4019			0.0115489
	PC8	34.9514	34.9699	0.287753	16.5989	16.4984	0.274117	0.0100745	0.0109362	0.00215904
		34.6918			16.1882			0.013393
		35.2664			16.708			0.00934106
	PC9	35.5103	36.0902	0.760736	14.4715	15.2239	0.79679	0.0440194	0.0287791	0.0147159
		36.9516			16.0587			0.0146507
		35.8088			15.1415			0.0276672
	PC10	34.2043	34.283	0.413651	17.0187	17.2542	0.64748	0.00753109	0.00680264	0.0026636
		34.7304			17.9865			0.00385061
		33.9144			16.7574			0.00902623
	PC11	34.1973	34.2647	0.340324	15.6787	15.8494	0.358726	0.0190657	0.0172723	0.00396442
		33.9631			15.608			0.020023
		34.6337			16.2616			0.012728
	PC12	34.7412	34.7893	0.271262	16.9591	17.0638	0.282195	0.0078487	0.00738962	0.00137022
		34.5454			16.849			0.00847135
		35.0814			17.3834			0.00584881
	PC13	33.3333	33.2363	0.115246	15.2499	15.1751	0.0746883	0.0256644	0.0270547	0.00139996
		33.1089			15.1005			0.0284641
		33.2668			15.1748			0.0270355
	PC14	34.6247	34.8937	0.272092	15.711	16.0218	0.318807	0.0186429	0.0152741	0.00332829
		35.1688			16.3481			0.0119879
		34.8875			16.0064			0.0151916
	PC15	33.9664	33.8559	0.120386	16.7058	16.6944	0.087084	0.00935548	0.00944059	0.000572872
		33.8737			16.7753			0.00891504
		33.7276			16.6023			0.0100513
	PC17	34.6284	34.0577	0.494959	14.13	13.4766	0.571785	0.0557754	0.0920614	0.0320392
		33.7448			13.2317			0.103959
		33.8			13.068			0.11645
	PC18	33.289	33.2097	0.104388	13.6809	13.7477	0.104463	0.0761446	0.0728266	0.00516063
		33.2487			13.868			0.0668809
		33.0914			13.694			0.0754541
	PC19	34.125	33.7941	0.351187	13.7479	13.4755	0.289589	0.0726896	0.0889936	0.0180573
		33.4256			13.1713			0.108402
		33.8318			13.5072			0.0858894
	PC20	33.9678	34.1026	0.178595	14.5111	14.7325	0.253443	0.0428283	0.0371062	0.00631602
		34.0349			14.6775			0.0381612
		34.3052			15.0089			0.0303291
	PC21	35.972	35.6474	0.485801	16.5789	16.2105	0.507039	0.0102155	0.0137689	0.00516159
		35.8812			16.4204			0.0114016
		35.0889			15.6322			0.0196895
	PC23	33.5101	33.6303	0.172936	7.84445	8.12376	0.274359	4.35095	3.62863	0.690537
		33.5522			8.13394			3.55993
		33.8285			8.39289			2.97501
	PC25	33.9592	33.4938	0.414423	15.2336	14.7464	0.428223	0.0259564	0.0374048	0.0101547
		33.3572			14.4294			0.0453238
		33.1648			14.5763			0.0409344
	PC27	34.4965	34.278	0.189653	13.241	13.1101	0.117654	0.103287	0.113352	0.00908488
		34.1822			13.0133			0.120946
		34.1554			13.0758			0.115822
	PC28	33.6268	33.4636	0.26412	13.5587	13.4343	0.275704	0.0828733	0.0914776	0.0182658
		33.605			13.6259			0.0791029
		33.1588			13.1183			0.112457
	PC29	34.4904	34.248	0.223105	15.4753	15.2788	0.211836	0.0219521	0.0253383	0.00376263
		34.0512			15.0544			0.0293889
		34.2026			15.3067			0.0246739
	AVR.		34.1808	0.803531		15.1255	1.95535		0.0279741	0.718741
		8. miR-655-3p
	Sample	Cт	Cт Mean	Cт SD	ΔCт	ΔCт Mean	ΔCт SD	2-ΔCт	2-ΔCт Mean	2-ΔCт SD	p-value
	PN1	28.8624	28.582	0.245043	9.03828	8.80752	0.203518	1.90198	2.24638	0.305152	9.78951e-05
		28.474			8.73063			2.35407
		28.4094			8.65365			2.48308
	PN2	28.6823	28.6539	0.0271277	8.63775	8.8322	0.176441	2.51061	2.20514	0.274934
		28.6282			8.98208			1.97754
		28.6513			8.87679			2.12726
	PN3	28.0119	28.0516	0.111892	8.6473	8.71353	0.13048	2.49403	2.38853	0.21023
		27.9649			8.62944			2.52511
		28.1779			8.86384			2.14644
	PN4	29.5736	29.246	0.295555	11.0678	10.7928	0.240272	0.465871	0.568778	0.0901545
		28.9994			10.6236			0.633846
		29.1649			10.6869			0.606617
	AVR.		28.6334	0.47404		9.2865	0.924092		1.60134	0.802628
	PC1	32.4928	32.4092	0.0834376	13.4855	13.5267	0.03792	0.0871879	0.0847517	0.00223608
		32.4088			13.5601			0.0827929
		32.3259			13.5345			0.0842742
	PC2	30.9292	30.7468	0.161081	13.6487	13.4697	0.236855	0.077863	0.0889625	0.0151211
		30.6868			13.5593			0.0828397
		30.6243			13.2011			0.106185
	PC3	29.1798	29.0221	0.138065	11.113	11.0175	0.0829573	0.451485	0.482915	0.0273047
		28.923			10.9635			0.500789
		28.9634			10.976			0.49647
	PC4	30.7614	30.6745	0.0959253	12.6094	12.5101	0.0985851	0.160025	0.171702	0.0117166
		30.5716			12.5085			0.171623
		30.6905			12.4123			0.183457
	PC5	31.4744	31.245	0.213978	12.9923	12.912	0.0856617	0.122725	0.1299	0.00774864
		31.2098			12.9219			0.128858
		31.0508			12.8218			0.138117
	PC6	29.5658	29.4599	0.0993525	11.9225	11.9527	0.026304	0.257611	0.2523	0.0046229
		29.3688			11.9651			0.250111
		29.445			11.9705			0.249179
	PC7	29.7498	29.6217	0.127619	11.7158	11.599	0.106631	0.297295	0.322947	0.0235623
		29.6208			11.5744			0.327922
		29.4945			11.5069			0.343625
	PC8	28.4993	28.5099	0.0278273	10.1468	10.0384	0.0938673	0.882111	0.952257	0.060753
		28.489			9.98532			0.986549
		28.5415			9.98304			0.988111
	PC9	28.439	28.4051	0.180204	7.40023	7.53881	0.136493	5.91984	5.39372	0.510857
		28.566			7.67311			4.89963
		28.2104			7.54309			5.3617
	PC10	29.9581	29.8509	0.11393	12.7725	12.8221	0.275969	0.142918	0.13975	0.0259464
		29.8634			13.1195			0.112365
		29.7313			12.5743			0.163967
	PC11	30.5315	30.6276	0.0968246	12.0129	12.2123	0.177535	0.241973	0.211816	0.0267102
		30.6261			12.271			0.202336
		30.7251			12.3531			0.191139
	PC12	28.8338	28.7444	0.0779125	11.0518	11.0189	0.0299464	0.471064	0.481988	0.0099692
		28.7082			11.0118			0.484305
		28.6912			10.9932			0.490595
	PC13	27.7086	27.6553	0.157225	9.62525	9.59398	0.193995	1.26623	1.30186	0.17739
		27.7789			9.77044			1.14499
		27.4783			9.38625			1.49436
	PC14	31.431	31.3964	0.071794	12.5173	12.5246	0.0355964	0.170573	0.169752	0.0041729
		31.3139			12.4932			0.173453
		31.4444			12.5632			0.16523
	PC15	28.9922	29.0648	0.0840966	11.7315	11.9033	0.164122	0.294071	0.262199	0.0300306
		29.157			12.0585			0.234432
		29.0452			11.9198			0.258093
	PC17	31.1197	31.017	0.0888968	10.6213	10.4359	0.193795	0.634844	0.726296	0.0981261
		30.9647			10.4516			0.714089
		30.9666			10.2347			0.829954
	PC18	33.0704	32.4826	0.509037	13.4623	13.0205	0.382652	0.0886015	0.123038	0.0298319
		32.1878			12.8071			0.139534
		32.1896			12.7922			0.14098
	PC19	34.5439	34.1957	0.301609	14.1668	13.877	0.252662	0.0543717	0.0671269	0.0111464
		34.0157			13.7614			0.0720142
		34.0275			13.7029			0.0749948
	PC20	31.5871	31.6693	0.0984668	12.1304	12.2992	0.176341	0.223046	0.199396	0.0241493
		31.6424			12.2851			0.200366
		31.7784			12.4822			0.174777
	PC21	29.5211	29.5201	0.0112698	10.128	10.0833	0.0409954	0.89363	0.922037	0.0260805
		29.5084			10.0476			0.944899
		29.5309			10.0742			0.927583
	PC23	35.9647	36.3518	0.676936	10.299	10.8453	0.748029	0.793748	0.588964	0.256675
		35.9572			10.539			0.672124
		37.1334			11.6979			0.301019
	PC25	31.9331	32.018	0.0748391	13.2074	13.2706	0.191586	0.105724	0.101774	0.013087
		32.0465			13.1187			0.112431
		32.0744			13.4859			0.0871673
	PC27	34.7895	34.3911	0.410193	13.5341	13.2231	0.378839	0.0842991	0.107082	0.0292786
		33.9701			12.8012			0.140105
		34.4136			13.334			0.096841
	PC28	31.7532	31.6682	0.127631	11.6851	11.639	0.140754	0.303691	0.314568	0.031301
		31.73			11.7509			0.290157
		31.5215			11.4809			0.349857
	PC29	30.6467	30.6029	0.0379524	11.6316	11.6337	0.0519662	0.315163	0.314854	0.0113273
		30.5795			11.5827			0.326023
		30.5825			11.6866			0.303375
	AVR.		30.854	2.0345		11.7987	1.47383		0.280695	1.04751
							Relatvie fold change		0.175287
		R. RNU6
	Sample	Cт	Cт Mean	Cт SD
	PN1	19.8242	19.7744	0.0434976
		19.7434
		19.7558
	PN2	20.0445	19.8217	0.203347
		19.6461
		19.7745
	PN3	19.3646	19.338	0.0253583
		19.3355
		19.314
	PN4	18.5058	18.4532	0.0684359
		18.3758
		18.478
	PC1	19.0073	18.8824	0.111847
		18.8487
		18.7914
	PC2	17.2805	17.277	0.147853
		17.1275
		17.4231
	PC3	18.0667	18.0045	0.0556299
		17.9595
		17.9873
	PC4	18.152	18.1644	0.108121
		18.0631
		18.2783
	PC5	18.4821	18.333	0.132465
		18.2879
		18.229
	PC6	17.6433	17.5072	0.123122
		17.4037
		17.4745
	PC7	18.0339	18.0227	0.030966
		18.0464
		17.9876
	PC8	18.3525	18.4715	0.106652
		18.5036
		18.5584
	PC9	21.0388	20.8663	0.187162
		20.8929
		20.6673
	PC10	17.1856	17.0288	0.247152
		16.7439
		17.157
	PC11	18.5186	18.4153	0.0899174
		18.3551
		18.372
	PC12	17.782	17.7255	0.0489912
		17.6964
		17.698
	PC13	18.0834	18.0613	0.045994
		18.0084
		18.0921
	PC14	18.9137	18.8718	0.0471771
		18.8207
		18.8811
	PC15	17.2607	17.1615	0.0869486
		17.0984
		17.1254
	PC17	20.4984	20.5812	0.130818
		20.5131
		20.732
	PC18	19.6081	19.4621	0.126731
		19.3807
		19.3974
	PC19	20.3771	20.3187	0.0616014
		20.2543
		20.3246
	PC20	19.4567	19.3701	0.0809957
		19.3574
		19.2962
	PC21	19.3931	19.4369	0.0379647
		19.4608
		19.4566
	PC23	25.6657	25.5065	0.138128
		25.4182
		25.4356
	PC25	18.7257	18.7474	0.170713
		18.9279
		18.5885
	PC27	21.2554	21.168	0.0879286
		21.1689
		21.0796
	PC28	20.0681	20.0292	0.045529
		19.9791
		20.0405
	PC29	19.0151	18.9693	0.0641924
		18.9968
		18.8959

## Sheet: S3
4	qRT-PCR Raw Data (Expression levels depend on stages)
	Target Gene : miR-9-5p, miR-136-5p, miR-148a-3p, miR-190a-5p, miR-199b-5p, miR-382-5p, miR-597-5p, miR-655-3p
	Reference Gene : RNU6
	Sample : PN(PN1, PN2, PN3, PN4, PN5), IA(PC21, PC23, PC24, PC26), IB(PC13, PC18, PC5, PC10, PC11, PC14, PC2, PC29, PC3, PC5, PC7, PC9), IIA(PC12, PC15, PC28, PC4, PC6), IIB+III(PC17, PC19, PC20, PC27, PC8, PC1)
	Total 32samples of Human RNA
	ΔCт = Target Cт - RNU6 Cт				ΔΔCт = Target Sample ΔCт - control Sample ΔCт
	2-ΔΔCт = Normalized gene amount of target group relative to target gene amount of control group
		1. miR-9-5p
	Sample	Cт	Cт Mean	Cт SD	ΔCт	ΔCт Mean	ΔCт SD	ΔΔCт	ΔΔCт Mean	ΔΔCт SD	2-ΔΔCт	2-ΔΔCт Mean	2-ΔΔCт SD
PN	PN1	25.2099	25.1736	0.0619717	5.3857	5.39911	0.0606949	-0.690317	-0.67691	0.0606949	1.61364	1.59965	0.066836
		25.2088			5.46539			-0.610633			1.52693
		25.102			5.34624			-0.729781			1.65839
	PN2	25.3083	25.3198	0.0850111	5.26383	5.4981	0.203889	-0.812188	-0.577918	0.203889	1.75587	1.50291	0.219923
		25.2411			5.59502			-0.481			1.39571
		25.41			5.63545			-0.440564			1.35714
	PN3	25.7306	25.5223	0.19653	6.36601	6.18424	0.171184	0.289994	0.108219	0.171184	0.817906	0.932057	0.109067
		25.4961			6.1606			0.0845782			0.94306
		25.3401			6.0261			-0.0499166			1.03521
	PN4	26.3779	26.2866	0.0827936	7.87204	7.83344	0.0425193	1.79602	1.75742	0.0425193	0.287967	0.295862	0.00874943
		26.2162			7.84041			1.76439			0.29435
		26.2658			7.78787			1.71185			0.305269
	PN5	24.7094	24.6218	0.0765582	5.31765	5.46521	0.1333	-0.758369	-0.610813	0.1333	1.69158	1.53152	0.143772
		24.5679			5.50105			-0.574972			1.48965
		24.5881			5.57692			-0.499097			1.41333
	AVR.		25.3848	0.567856		6.07602	0.963063		-5.77316e-16	0.963063		1	0.528572
IA1	PC21	25.1289	25.0424	0.0758645	5.73584	5.60555	0.113258	-0.340181	-0.470473	0.113258	1.26592	1.38837	0.106502
		25.011			5.55017			-0.525853			1.43979
		24.9873			5.53063			-0.545385			1.45941
	PC23	33.5121	33.5247	0.0164658	7.84648	8.01819	0.148751	1.77046	1.94217	0.148751	0.293116	0.261167	0.0276761
		33.5186			8.10032			2.02431			0.245823
		33.5433			8.10776			2.03174			0.24456
	PC24	32.9325	33.3217	0.338085	7.31769	7.83657	0.471533	1.24167	1.76055	0.471533	0.422884	0.306141	0.104018
		33.4909			7.95313			1.87711			0.272228
		33.5418			8.23889			2.16287			0.223312
	PC26	26.1451	26.1607	0.119227	4.35777	4.29749	0.161758	-1.71825	-1.77853	0.161758	3.29038	3.44541	0.395927
		26.2869			4.42046			-1.65556			3.15046
		26.05			4.11425			-1.96177			3.89539
	AVR.		29.5124	4.10921		6.43945	1.64455		0.363429	1.64455		0.777315	1.36053
IB	PC13	22.0224	21.9688	0.0485204	3.93901	3.90754	0.062287	-2.13701	-2.16848	0.062287	4.39849	4.4983	0.196515
		21.9562			3.94781			-2.1282			4.37173
		21.9279			3.8358			-2.24022			4.72469
	PC18	24.7731	24.6702	0.0933137	5.16505	5.20814	0.0518095	-0.910964	-0.867878	0.0518095	1.8803	1.82576	0.0651012
		24.6463			5.26563			-0.810392			1.75369
		24.5911			5.19374			-0.882278			1.84328
	PC25	24.972	24.9461	0.0235213	6.24632	6.19877	0.18153	0.170306	0.122747	0.18153	0.888654	0.923365	0.118581
		24.9261			5.99819			-0.0778287			1.05543
		24.9403			6.35178			0.275763			0.826013
	PC10	22.661	22.6573	0.0211658	5.47544	5.62848	0.228074	-0.600581	-0.447536	0.228074	1.51633	1.37476	0.207043
		22.6345			5.89061			-0.185405			1.13714
		22.6764			5.5194			-0.556621			1.47082
	PC11	22.2378	22.0771	0.154188	3.71918	3.6618	0.089754	-2.35684	-2.41422	0.089754	5.12247	5.33728	0.337682
		22.063			3.70785			-2.36817			5.16286
		21.9304			3.55836			-2.51765			5.7265
	PC14	24.9201	24.9191	0.0657845	6.00645	6.04729	0.0501621	-0.0695699	-0.028731	0.0501621	1.0494	1.02052	0.0352231
		24.8528			6.03214			-0.0438836			1.03089
		24.9844			6.10328			0.0272605			0.981282
	PC2	23.5056	23.51	0.0282708	6.22513	6.23292	0.11999	0.149113	0.156906	0.11999	0.901805	0.89901	0.0744052
		23.4841			6.35662			0.280602			0.823247
		23.5401			6.11702			0.0410029			0.971979
	PC29	25.6468	25.3942	0.218784	6.63172	6.42494	0.185257	0.555699	0.348922	0.185257	0.680327	0.789416	0.0984662
		25.2709			6.27409			0.198071			0.871715
		25.2649			6.36901			0.292996			0.816205
	PC3	23.9057	23.7936	0.0973734	5.83893	5.78904	0.0482622	-0.237085	-0.286983	0.0482622	1.17861	1.22054	0.0407517
		23.7451			5.78558			-0.290443			1.22302
		23.7299			5.7426			-0.333423			1.26
	PC5	22.279	22.3037	0.0223996	3.79683	3.9707	0.152307	-2.27919	-2.10532	0.152307	4.85406	4.31922	0.46762
		22.3226			4.03477			-2.04125			4.11601
		22.3095			4.08051			-1.99551			3.98758
	PC7	20.2207	20.0062	0.18625	2.18674	1.98353	0.18118	-3.88928	-4.09249	0.18118	14.818	17.1475	2.09013
		19.8853			1.83885			-4.23717			18.8588
		19.9126			1.92499			-4.15103			17.7658
	PC9	23.9602	23.9138	0.0787592	2.92141	3.0475	0.118123	-3.15461	-3.02852	0.118123	8.90498	8.17808	0.67511
		23.9584			3.06551			-3.01051			8.05851
		23.8229			3.15558			-2.92043			7.57074
	AVR.		23.3467	1.54499		4.84172	1.43273		-1.2343	1.43273		2.35267	4.66197
IIA	PC12	24.5588	24.5425	0.0510625	6.77673	6.81698	0.0608537	0.700713	0.740963	0.0608537	0.615268	0.598692	0.0249488
		24.5834			6.88699			0.810969			0.569999
		24.4852			6.78723			0.711207			0.610809
	PC15	24.6807	24.539	0.129875	7.41999	7.37751	0.0670725	1.34397	1.30149	0.0670725	0.393934	0.406002	0.0191181
		24.5108			7.41234			1.33633			0.396028
		24.4256			7.30018			1.22417			0.428045
	PC28	23.2642	23.2398	0.0386343	3.19611	3.2106	0.0126648	-2.87991	-2.86542	0.0126648	7.36106	7.28766	0.0641238
		23.1953			3.21616			-2.85986			7.25946
		23.26			3.21954			-2.85648			7.24248
	PC4	23.551	23.4675	0.0874202	5.39902	5.3031	0.177415	-0.677003	-0.772921	0.177415	1.59882	1.71755	0.218093
		23.475			5.41191			-0.664113			1.58459
		23.3766			5.09837			-0.977647			1.96925
	PC6	27.2187	27.1837	0.12875	9.57536	9.67648	0.125369	3.49934	3.60047	0.125369	0.088429	0.0826478	0.00704255
		27.041			9.63734			3.56132			0.08471
		27.2913			9.81675			3.74073			0.0748043
	AVR.		24.5945	1.45245		6.47693	2.23196		0.400915	2.23196		0.757378	2.78722
IIB+III	PC17	23.6148	23.5819	0.0312123	3.11642	3.00075	0.158029	-2.9596	-3.07526	0.158029	7.77908	8.4628	0.950989
		23.5783			3.06515			-3.01087			8.0605
		23.5527			2.8207			-3.25532			9.54882
	PC19	25.1835	25.1451	0.0562337	4.80644	4.82647	0.0201213	-1.26957	-1.24955	0.0201213	2.4109	2.37783	0.0331595
		25.0806			4.82628			-1.24974			2.37799
		25.1713			4.84669			-1.22933			2.34459
	PC20	27.4963	27.314	0.157909	8.03956	7.94393	0.0901628	1.96354	1.86791	0.0901628	0.256398	0.274325	0.0170292
		27.2178			7.86047			1.78445			0.290286
		27.228			7.93176			1.85574			0.276291
	PC27	26.7919	26.807	0.0179163	5.53646	5.6391	0.105503	-0.539562	-0.436923	0.105503	1.45353	1.35612	0.0988231
		26.8025			5.63358			-0.442436			1.3589
		26.8268			5.74725			-0.328771			1.25594
	PC8	25.1126	24.9876	0.108264	6.76006	6.51604	0.213208	0.684045	0.440018	0.213208	0.622418	0.74236	0.105051
		24.9259			6.42224			0.346217			0.786644
		24.9242			6.36581			0.289794			0.818019
	PC1	24.9724	24.9509	0.0223698	5.96514	6.06848	0.090963	-0.110881	-0.00753466	0.090963	1.07989	1.00658	0.0644164
		24.9526			6.10391			0.0278937			0.980851
		24.9278			6.1364			0.0603835			0.959009
	AVR.		25.4644	1.28716		5.6658	1.5689		-0.410223	1.5689		1.32889	2.90043
		2. miR-136-5p
	Sample	Cт	Cт Mean	Cт SD	ΔCт	ΔCт Mean	ΔCт SD	ΔΔCт	ΔΔCт Mean	ΔΔCт SD	2-ΔΔCт	2-ΔΔCт Mean	2-ΔΔCт SD
PN	PN1	27.2731	27.1485	0.109112	7.44892	7.3741	0.068658	-0.200269	-0.275088	0.068658	1.14891	1.21098	0.0571928
		27.1028			7.3594			-0.289793			1.22246
		27.0697			7.31399			-0.335203			1.26155
	PN2	25.9329	25.8867	0.0456424	5.8884	6.06496	0.17549	-1.76079	-1.58423	0.17549	3.38883	3.0133	0.36627
		25.8855			6.23936			-1.40983			2.65706
		25.8417			6.06712			-1.58207			2.994
	PN3	26.8472	26.7674	0.0775524	7.48267	7.42936	0.0522152	-0.166526	-0.219836	0.0522152	1.12235	1.16511	0.0421122
		26.7626			7.42709			-0.222099			1.16643
		26.6923			7.37831			-0.270883			1.20655
	PN4	28.263	28.2042	0.068933	9.75723	9.75096	0.00717582	2.10804	2.10176	0.00717582	0.231962	0.232975	0.00115968
		28.1283			9.7525			2.10331			0.232723
		28.2211			9.74313			2.09394			0.23424
	PN5	26.9299	26.7832	0.138734	7.53813	7.62658	0.0815015	-0.111066	-0.0226098	0.0815015	1.08003	1.01688	0.0578909
		26.7655			7.69863			0.0494409			0.966311
		26.6541			7.64299			-0.0062041			1.00431
	AVR.		26.958	0.779171		7.64919	1.23187		-1.18655e-16	1.23187		1	0.956709
IA1	PC21	27.3305	27.2042	0.147924	7.93745	7.76734	0.178988	0.288262	0.118152	0.178988	0.818888	0.926127	0.115651
		27.0415			7.58064			-0.0685572			1.04867
		27.2406			7.78395			0.134753			0.910826
	PC23	26.8851	26.717	0.15325	1.21946	1.21047	0.0568863	-6.42973	-6.43872	0.0568863	86.2069	86.791	3.43711
		26.6806			1.26232			-6.38687			83.6834
		26.5852			1.14962			-6.49957			90.4827
	PC24	28.1329	28.1039	0.0844084	2.51808	2.61869	0.216336	-5.13111	-5.0305	0.216336	35.0445	32.9226	4.71839
		28.0088			2.47098			-5.17821			36.2074
		28.17			2.86701			-4.78219			27.5158
	PC26	27.9597	27.9433	0.0142121	6.17232	6.08014	0.0875022	-1.47687	-1.56906	0.0875022	2.78344	2.97073	0.179147
		27.9363			6.06986			-1.57933			2.98831
		27.934			5.99823			-1.65097			3.14044
	AVR.		27.4921	0.594686		4.41916	2.74192		-3.23003	2.74192		9.38289	36.2909
IB	PC13	28.9261	28.8061	0.116927	10.8427	10.7449	0.12766	3.19352	3.09567	0.12766	0.109309	0.11729	0.0105832
		28.7998			10.7914			3.14222			0.113266
		28.6925			10.6005			2.95126			0.129295
	PC18	30.5061	30.4185	0.0776432	10.8981	10.9564	0.0511703	3.24888	3.30724	0.0511703	0.105194	0.101066	0.00361667
		30.3583			10.9777			3.32846			0.0995483
		30.391			10.9936			3.34439			0.0984552
	PC25	30.1161	30.0446	0.0670135	11.3904	11.2972	0.165203	3.74121	3.648	0.165203	0.0747795	0.0801272	0.00945678
		30.0343			11.1064			3.45726			0.0910462
		29.9832			11.3947			3.74553			0.074556
	PC10	29.2844	29.2203	0.0555238	12.0988	12.1915	0.219464	4.4496	4.5423	0.219464	0.0457655	0.0432402	0.00629574
		29.186			12.4421			4.7929			0.0360739
		29.1905			12.0336			4.38439			0.0478813
	PC11	30.8971	30.8437	0.0869782	12.3785	12.4284	0.0928429	4.72926	4.77925	0.0928429	0.0377007	0.0364665	0.00230191
		30.8907			12.5356			4.88638			0.0338107
		30.7433			12.3713			4.72211			0.0378881
	PC14	30.4086	30.4762	0.0803734	11.4949	11.6043	0.127497	3.84571	3.95515	0.127497	0.0695546	0.0646398	0.00562103
		30.5651			11.7443			4.09515			0.058511
		30.4549			11.5738			3.92459			0.0658539
	PC2	30.296	30.2386	0.0511109	13.0155	12.9616	0.166434	5.36632	5.31241	0.166434	0.0242424	0.0252791	0.00298325
		30.2219			13.0944			5.44521			0.0229524
		30.198			12.7749			5.12571			0.0286424
	PC29	29.3876	29.1788	0.216289	10.3725	10.2095	0.156771	2.72335	2.56032	0.156771	0.151423	0.170203	0.0183405
		29.193			10.1961			2.54695			0.171116
		28.9558			10.0599			2.41066			0.18807
	PC3	29.1753	29.1072	0.122455	11.1086	11.1027	0.121334	3.45937	3.45348	0.121334	0.0909127	0.0915009	0.00771205
		29.1805			11.2209			3.57175			0.0840997
		28.9658			10.9785			3.3293			0.0994902
	PC5	31.9578	31.5849	0.383588	13.4756	13.2519	0.262861	5.82645	5.60274	0.262861	0.0176224	0.0208114	0.0038941
		31.6056			13.3177			5.66854			0.0196607
		31.1914			12.9624			5.31323			0.0251512
	PC7	29.3392	29.2094	0.112932	11.3053	11.1867	0.104393	3.65611	3.53754	0.104393	0.0793236	0.0862665	0.00612586
		29.155			11.1086			3.45942			0.09091
		29.1339			11.1463			3.49711			0.0885659
	PC9	27.4326	27.2188	0.185332	6.39381	6.3525	0.126619	-1.25539	-1.29669	0.126619	2.38731	2.46304	0.220056
		27.1033			6.21039			-1.4388			2.71096
		27.1206			6.45331			-1.19588			2.29085
	AVR.		29.6956	1.1201		11.1906	1.7301		3.54145	1.7301		0.085885	0.672448
IIA	PC12	28.3037	28.3521	0.0439354	10.5216	10.6266	0.0917561	2.87243	2.97743	0.0917561	0.136557	0.127144	0.00821761
		28.3633			10.6669			3.01769			0.123477
		28.3894			10.6914			3.04217			0.121399
	PC15	29.175	29.0895	0.0775219	11.9143	11.928	0.0382941	4.26514	4.27881	0.0382941	0.0520075	0.0515289	0.00135912
		29.0697			11.9713			4.32207			0.0499952
		29.0238			11.8984			4.24924			0.0525839
	PC28	30.5769	30.6731	0.0945802	10.5088	10.6439	0.117788	2.85963	2.99466	0.117788	0.137773	0.125746	0.0104812
		30.6764			10.6973			3.04808			0.120903
		30.766			10.7255			3.07628			0.118562
	PC4	30.9326	30.9112	0.0344785	12.7806	12.7467	0.139779	5.13139	5.09755	0.139779	0.0285298	0.0292992	0.00288182
		30.9296			12.8665			5.21731			0.0268802
		30.8714			12.5932			4.94396			0.0324877
	PC6	29.0957	29.0605	0.0347883	11.4524	11.5533	0.0893867	3.80322	3.90415	0.0893867	0.0716337	0.0668799	0.00420102
		29.0262			11.6225			3.97332			0.0636667
		29.0596			11.5851			3.93591			0.0653392
	AVR.		29.6173	1.03417		11.4997	0.837135		3.85052	0.837135		0.069323	0.0414177
IIB+III	PC17	28.4469	28.4408	0.0369366	7.9485	7.85963	0.10598	0.299309	0.210435	0.10598	0.812641	0.865846	0.0644257
		28.4012			7.88804			0.238852			0.847419
		28.4743			7.74234			0.093144			0.937478
	PC19	32.0912	32.1296	0.141772	11.7141	11.8109	0.19221	4.06494	4.16172	0.19221	0.0597492	0.0561953	0.00718593
		32.2866			12.0323			4.38308			0.0479249
		32.0109			11.6863			4.03714			0.0609117
	PC20	29.4788	29.567	0.0874129	10.0221	10.1969	0.151853	2.37287	2.54767	0.151853	0.193061	0.171675	0.0185684
		29.6536			10.2962			2.64703			0.159648
		29.5686			10.2723			2.62311			0.162317
	PC27	32.2199	32.2719	0.116395	10.9645	11.104	0.136074	3.31529	3.45476	0.136074	0.100461	0.0914752	0.00864972
		32.4052			11.2364			3.58717			0.0832061
		32.1906			11.111			3.46182			0.0907585
	PC8	28.6444	28.6413	0.0202363	10.2919	10.1697	0.106073	2.64273	2.52054	0.106073	0.160125	0.174588	0.012559
		28.6196			10.116			2.4668			0.180893
		28.6597			10.1013			2.4521			0.182745
	PC1	32.404	32.3011	0.138561	13.3967	13.4186	0.136064	5.74752	5.76944	0.136064	0.0186133	0.0183867	0.0017129
		32.1435			13.2949			5.64566			0.019975
		32.3557			13.5643			5.91513			0.0165718
	AVR.		30.5586	1.76364		10.76	1.75474		3.11076	1.75474		0.115762	0.299452
		3. miR-148a-3p
	Sample	Cт	Cт Mean	Cт SD	ΔCт	ΔCт Mean	ΔCт SD	ΔΔCт	ΔΔCт Mean	ΔΔCт SD	2-ΔΔCт	2-ΔΔCт Mean	2-ΔΔCт SD
PN	PN1	21.9005	21.7686	0.134657	2.07638	1.99412	0.096452	0.251151	0.168893	0.096452	0.840226	0.890861	0.0602146
		21.6314			1.88797			0.0627396			0.957444
		21.7738			2.01802			0.192788			0.874913
	PN2	22.079	22.0811	0.0532791	2.03452	2.2594	0.19506	0.209293	0.434173	0.19506	0.864961	0.744751	0.104235
		22.0289			2.3828			0.557574			0.679444
		22.1354			2.36088			0.535651			0.689847
	PN3	21.1165	20.9933	0.1086	1.75191	1.65527	0.0892802	-0.0733231	-0.169956	0.0892802	1.05214	1.12645	0.0690743
		20.9113			1.57585			-0.249377			1.18869
		20.9521			1.63806			-0.187169			1.13853
	PN4	20.1559	20.058	0.0865014	1.65005	1.60479	0.0787819	-0.175183	-0.220441	0.0787819	1.12911	1.16626	0.0646575
		20.0263			1.6505			-0.174729			1.12875
		19.9918			1.51382			-0.31141			1.24092
	PN5	20.8533	20.7692	0.0743599	1.46151	1.61256	0.131462	-0.363725	-0.212669	0.131462	1.28674	1.16209	0.108404
		20.742			1.6751			-0.150134			1.10967
		20.7122			1.70108			-0.124148			1.08986
	AVR.		21.134	0.752273		1.82523	0.289931		-4.996e-17	0.289931		1	0.190187
IA1	PC21	21.3139	21.3333	0.0954982	1.92078	1.89639	0.0943042	0.0955536	0.0711599	0.0943042	0.935913	0.953239	0.0630084
		21.437			1.9761			0.150871			0.900707
		21.2489			1.79229			-0.0329445			1.0231
	PC23	28.247	28.1816	0.0605838	2.58131	2.67509	0.0866422	0.75608	0.849862	0.0866422	0.592103	0.555509	0.033624
		28.1704			2.75216			0.926929			0.525977
		28.1274			2.69181			0.866576			0.548447
	PC24	28.1172	28.0122	0.0913088	2.50245	2.52707	0.111042	0.677219	0.701839	0.111042	0.62537	0.615993	0.0467978
		27.9682			2.4304			0.605174			0.657392
		27.9513			2.64836			0.823125			0.565216
	PC26	23.9287	23.9078	0.0400214	2.14137	2.04458	0.109407	0.316142	0.219349	0.109407	0.803215	0.860612	0.0659257
		23.933			2.06649			0.24126			0.846006
		23.8616			1.92587			0.100644			0.932616
	AVR.		25.3587	3.01517		2.28578	0.349046		0.460552	0.349046		0.726708	0.178654
IB	PC13	21.5487	21.4644	0.0950021	3.46533	3.4031	0.115866	1.6401	1.57787	0.115866	0.320833	0.335708	0.0275514
		21.483			3.47455			1.64932			0.31879
		21.3615			3.26942			1.44419			0.367499
	PC18	21.9718	21.9505	0.0212831	2.36374	2.48847	0.109682	0.538507	0.663243	0.109682	0.688483	0.63269	0.0489701
		21.9505			2.56984			0.744607			0.59683
		21.9292			2.53185			0.706615			0.612756
	PC25	22.91	22.7237	0.161763	4.18431	3.9763	0.239925	2.35908	2.15107	0.239925	0.194915	0.227263	0.0386535
		22.6417			3.71383			1.88859			0.27007
		22.6193			4.03076			2.20553			0.216805
	PC10	19.1152	19.1188	0.0226615	1.92967	2.09002	0.230584	0.104438	0.264786	0.230584	0.930167	0.839221	0.127869
		19.0982			2.35427			0.529041			0.693015
		19.1431			1.98611			0.16088			0.894479
	PC11	20.6795	20.5695	0.113252	2.16084	2.15423	0.0699627	0.335609	0.328996	0.0699627	0.79245	0.796716	0.0387562
		20.5758			2.22065			0.395417			0.760269
		20.4532			2.08119			0.255962			0.837429
	PC14	21.3976	21.3568	0.0360712	2.48389	2.48494	0.0374894	0.658664	0.659712	0.0374894	0.633465	0.633147	0.0164424
		21.3437			2.52295			0.697715			0.616548
		21.3291			2.44799			0.622758			0.649428
	PC2	20.4353	20.3892	0.148867	3.15483	3.11221	0.0371732	1.3296	1.28698	0.0371732	0.397879	0.409899	0.010487
		20.2228			3.0953			1.27007			0.414638
		20.5096			3.08649			1.26126			0.41718
	PC29	22.5826	22.4719	0.101398	3.56753	3.50264	0.100594	1.7423	1.67741	0.100594	0.298893	0.313157	0.0222471
		22.3836			3.38676			1.56153			0.338791
		22.4495			3.55363			1.7284			0.301786
	PC3	19.861	19.6574	0.181011	1.79427	1.65289	0.134193	-0.030957	-0.172336	0.134193	1.02169	1.13012	0.104156
		19.5967			1.63713			-0.1881			1.13926
		19.5146			1.52728			-0.297952			1.2294
	PC5	20.988	20.9692	0.0244187	2.50589	2.63618	0.113398	0.680658	0.810953	0.113398	0.623881	0.571197	0.0458232
		20.9779			2.69008			0.864852			0.549103
		20.9416			2.71258			0.887349			0.540606
	PC7	18.6537	18.3997	0.222337	0.619745	0.376988	0.219066	-1.20549	-1.44824	0.219066	2.30615	2.74936	0.404216
		18.2404			0.194033			-1.6312			3.0977
		18.3048			0.317186			-1.50804			2.84424
	PC9	21.9701	21.9108	0.0714139	0.931259	1.04446	0.116605	-0.893971	-0.78077	0.116605	1.85828	1.72178	0.138578
		21.9308			1.03793			-0.787303			1.72584
		21.8315			1.16419			-0.661036			1.58122
	AVR.		20.9152	1.30614		2.4102	1.01809		0.584972	1.01809		0.666662	0.711075
IIA	PC12	19.8609	19.7864	0.0697246	2.07881	2.06092	0.0314306	0.253576	0.235685	0.0314306	0.838815	0.849416	0.0186203
		19.7757			2.07932			0.254087			0.838518
		19.7226			2.02462			0.199393			0.870917
	PC15	20.6003	20.4427	0.137534	3.33962	3.28123	0.059105	1.51439	1.456	0.059105	0.350045	0.364707	0.0149492
		20.3811			3.28263			1.4574			0.364149
		20.3468			3.22143			1.3962			0.379928
	PC28	23.3147	23.1856	0.122518	3.24662	3.15641	0.0805283	1.42139	1.33118	0.0805283	0.373351	0.397854	0.0219318
		23.0709			3.09179			1.26656			0.415648
		23.1713			3.1308			1.30557			0.404562
	PC4	21.1955	21.135	0.0895337	3.04355	2.9706	0.190947	1.21832	1.14537	0.190947	0.429782	0.454774	0.0619634
		21.1774			3.11432			1.28909			0.40921
		21.0322			2.75393			0.928703			0.525331
	PC6	19.4807	19.4106	0.0702443	1.83735	1.90342	0.0572161	0.0121185	0.0781859	0.0572161	0.991635	0.947748	0.0380071
		19.3402			1.93652			0.111289			0.92576
		19.4109			1.93638			0.11115			0.92585
	AVR.		20.7921	1.38279		2.67451	0.602296		0.849283	0.602296		0.555061	0.255498
IIB+III	PC17	23.7379	23.5871	0.131903	3.23959	3.00591	0.239164	1.41436	1.18068	0.239164	0.375177	0.445208	0.073953
		23.5297			3.01653			1.1913			0.437907
		23.4936			2.76161			0.936383			0.522541
	PC19	23.5619	23.5442	0.0215419	3.18486	3.22559	0.0405476	1.35963	1.40036	0.0405476	0.389682	0.378935	0.0106511
		23.5203			3.26595			1.44072			0.368382
		23.5505			3.22594			1.40071			0.378742
	PC20	22.9924	22.9837	0.0573225	3.5357	3.61355	0.110367	1.71047	1.78832	0.110367	0.30556	0.290066	0.0217192
		22.9225			3.5651			1.73987			0.299398
		23.0361			3.73986			1.91463			0.265241
	PC27	24.2162	24.0961	0.11999	2.96081	2.92812	0.0320824	1.13558	1.10289	0.0320824	0.455153	0.465658	0.0103479
		24.0958			2.92689			1.10166			0.465982
		23.9762			2.89668			1.07145			0.475841
	PC8	20.5943	20.5066	0.0759941	2.24175	2.0351	0.180487	0.416516	0.209869	0.180487	0.749232	0.869032	0.10484
		20.4588			1.95519			0.129964			0.913854
		20.4668			1.90836			0.0831272			0.944009
	PC1	23.8346	23.8195	0.0372768	4.82733	4.93706	0.114324	3.0021	3.11183	0.114324	0.124818	0.115918	0.00913729
		23.777			4.92837			3.10314			0.116376
		23.8469			5.05548			3.23025			0.106561
	AVR.		23.0895	1.23988		3.29089	0.909415		1.46566	0.909415		0.36207	0.240052
		4. miR-190a-5p
	Sample	Cт	Cт Mean	Cт SD	ΔCт	ΔCт Mean	ΔCт SD	ΔΔCт	ΔΔCт Mean	ΔΔCт SD	2-ΔΔCт	2-ΔΔCт Mean	2-ΔΔCт SD
PN	PN1	26.6297	26.4464	0.158989	6.80558	6.67191	0.116548	-0.253665	-0.387336	0.116548	1.19223	1.31078	0.103465
		26.362			6.61859			-0.440663			1.35723
		26.3473			6.59157			-0.467679			1.38288
	PN2	26.4553	26.3954	0.0619656	6.41074	6.57363	0.171825	-0.648509	-0.485618	0.171825	1.56755	1.40678	0.165817
		26.3993			6.75318			-0.306071			1.23634
		26.3315			6.55697			-0.502275			1.41644
	PN3	25.9581	25.8633	0.113856	6.59349	6.5253	0.0902403	-0.465758	-0.533945	0.0902403	1.38104	1.44979	0.0920062
		25.8949			6.55945			-0.499803			1.41402
		25.737			6.42297			-0.636275			1.55431
	PN4	27.1556	27.1246	0.0891076	8.64977	8.67141	0.038743	1.59052	1.61216	0.038743	0.332051	0.327187	0.00871743
		27.0241			8.64831			1.58906			0.332387
		27.1941			8.71614			1.65689			0.317123
	PN5	26.2039	26.0106	0.167558	6.81207	6.85399	0.0509402	-0.24718	-0.205258	0.0509402	1.18688	1.15337	0.0404307
		25.9061			6.83922			-0.220029			1.16476
		25.9218			6.91068			-0.148564			1.10847
	AVR.		26.368	0.466101		7.05925	0.847142		1.13798e-15	0.847142		1	0.436428
IA1	PC21	27.1371	27.1355	0.00253829	7.74405	7.69863	0.0393308	0.684798	0.639383	0.0393308	0.622093	0.642146	0.0173663
		27.1368			7.67592			0.616671			0.652174
		27.1326			7.67593			0.616679			0.65217
	PC23	34.5648	34.2215	0.344681	8.89916	8.71503	0.242763	1.83991	1.65578	0.242763	0.279339	0.32045	0.0558536
		34.2242			8.80601			1.74676			0.297971
		33.8755			8.43992			1.38067			0.384041
	PC24	33.6876	33.6361	0.214148	8.07287	8.15094	0.333792	1.01362	1.09169	0.333792	0.495301	0.477406	0.105504
		33.4009			7.8631			0.803851			0.572818
		33.8198			8.51685			1.4576			0.364099
	PC26	30.0105	29.8481	0.142357	8.2231	7.98492	0.20664	1.16385	0.92567	0.20664	0.446319	0.529944	0.0725862
		29.7446			7.87817			0.818919			0.566866
		29.7893			7.85349			0.79424			0.576647
	AVR.		31.2103	3.02421		8.13738	0.434638		1.07813	0.434638		0.473642	0.135014
IB	PC13	26.263	26.1262	0.133422	8.17962	8.06486	0.143187	1.12037	1.00561	0.143187	0.459977	0.499718	0.0505785
		26.119			8.11057			1.05132			0.482526
		25.9965			7.9044			0.845153			0.556652
	PC18	28.2088	28.1678	0.0366949	8.60074	8.70569	0.0925425	1.54149	1.64645	0.0925425	0.34353	0.319869	0.020825
		28.1563			8.77557			1.71632			0.304324
		28.1382			8.74077			1.68153			0.311753
	PC25	28.4395	28.3742	0.0636583	9.71384	9.62686	0.159375	2.65459	2.56762	0.159375	0.158814	0.169384	0.019265
		28.3708			9.44292			2.38368			0.191621
		28.3123			9.72383			2.66458			0.157718
	PC10	26.2097	26.1481	0.073356	9.02415	9.11928	0.269735	1.9649	2.06003	0.269735	0.256157	0.242533	0.0431717
		26.1676			9.42369			2.36444			0.194193
		26.0669			8.90999			1.85075			0.277249
	PC11	28.2824	28.2026	0.0802856	9.76375	9.78737	0.0534613	2.7045	2.72812	0.0534613	0.153414	0.150991	0.00553873
		28.2037			9.84857			2.78932			0.144654
		28.1218			9.74978			2.69053			0.154906
	PC14	28.9576	28.9584	0.0166155	10.044	10.0865	0.0595879	2.9847	3.02728	0.0595879	0.126333	0.122728	0.0050128
		28.9753			10.1546			3.09538			0.117004
		28.9421			10.061			3.00176			0.124848
	PC2	27.2394	27.1705	0.0600059	9.95889	9.89351	0.164562	2.89964	2.83427	0.164562	0.134005	0.140838	0.0164894
		27.1428			10.0153			2.95609			0.128863
		27.1294			9.70631			2.64706			0.159645
	PC29	27.88	27.8682	0.10707	8.86491	8.8989	0.159764	1.80566	1.83965	0.159764	0.28605	0.280521	0.0304918
		27.7557			8.75886			1.69961			0.30787
		27.9688			9.07292			2.01367			0.247643
	PC3	26.6187	26.5503	0.0746015	8.55194	8.54571	0.0594667	1.4927	1.48646	0.0594667	0.355348	0.357089	0.0147628
		26.5614			8.60182			1.54257			0.343274
		26.4707			8.48338			1.42413			0.372645
	PC5	28.1638	27.9883	0.156008	9.68166	9.65533	0.0235514	2.62241	2.59608	0.0235514	0.162396	0.165402	0.00269078
		27.9359			9.64805			2.5888			0.166224
		27.8653			9.63627			2.57703			0.167586
	PC7	26.6141	26.527	0.0754226	8.58012	8.50437	0.070762	1.52087	1.44512	0.070762	0.348475	0.367556	0.0179187
		26.4864			8.43998			1.38073			0.384025
		26.4806			8.493			1.43375			0.370167
	PC9	26.9433	26.7238	0.192872	5.90452	5.85751	0.0898123	-1.15473	-1.20174	0.0898123	2.22642	2.30318	0.145828
		26.6468			5.75395			-1.3053			2.47136
		26.5814			5.91405			-1.1452			2.21176
	AVR.		27.4004	0.94609		8.89549	1.12397		1.83624	1.12397		0.28005	0.585909
IIA	PC12	25.8158	25.7573	0.0685674	8.03372	8.03181	0.0470783	0.974467	0.972566	0.0470783	0.508928	0.50978	0.0166494
		25.7743			8.07791			1.01866			0.493573
		25.6818			7.98381			0.924565			0.526839
	PC15	26.0843	26.0245	0.0700034	8.82357	8.863	0.0695717	1.76433	1.80375	0.0695717	0.294364	0.28665	0.0136257
		26.0417			8.94333			1.88408			0.270917
		25.9475			8.82209			1.76284			0.294667
	PC28	28.3173	28.3235	0.0287466	8.24924	8.29428	0.0706637	1.18999	1.23503	0.0706637	0.438305	0.42517	0.0205275
		28.3549			8.37572			1.31647			0.401515
		28.2984			8.25787			1.19862			0.43569
	PC4	28.5682	28.6365	0.225799	10.4162	10.4721	0.120471	3.35697	3.41285	0.120471	0.0976007	0.0941073	0.00767082
		28.4528			10.3897			3.33047			0.0994097
		28.8886			10.6104			3.55111			0.0853116
	PC6	26.3074	26.219	0.090604	8.66408	8.71178	0.0934368	1.60483	1.65254	0.0934368	0.328775	0.31852	0.0202372
		26.2231			8.81944			1.7602			0.295208
		26.1263			8.65183			1.59258			0.331577
	AVR.		26.9922	1.27464		8.8746	0.884296		1.81535	0.884296		0.284136	0.146302
IIB+III	PC17	27.8106	27.8106	0.113419	7.31229	7.22945	0.0718471	0.253037	0.170204	0.0718471	0.839128	0.889445	0.0436495
		27.6972			7.18403			0.124783			0.917142
		27.924			7.19204			0.132792			0.912064
	PC19	28.8114	28.679	0.114809	8.43437	8.36032	0.071087	1.37512	1.30107	0.071087	0.385519	0.406152	0.0199409
		28.6083			8.35396			1.29471			0.407618
		28.6172			8.29263			1.23338			0.42532
	PC20	28.6963	28.6192	0.0670098	9.23957	9.24905	0.0367828	2.18032	2.1898	0.0367828	0.220627	0.219229	0.00556322
		28.5753			9.21793			2.15868			0.223961
		28.5859			9.28964			2.23039			0.213101
	PC27	30.0674	30.0404	0.0603212	8.81203	8.87244	0.0534532	1.75278	1.8132	0.0534532	0.29673	0.284691	0.0106378
		30.0825			8.91359			1.85434			0.27656
		29.9713			8.89172			1.83247			0.280783
	PC8	27.3048	27.3894	0.0787039	8.95228	8.91787	0.0635473	1.89303	1.85862	0.0635473	0.269242	0.27592	0.0123033
		27.4604			8.95679			1.89754			0.2684
		27.403			8.84454			1.78529			0.290118
	PC1	27.9098	27.7293	0.156393	8.90255	8.84684	0.0579312	1.8433	1.78759	0.0579312	0.278684	0.289811	0.0116603
		27.6356			8.78691			1.72767			0.30194
		27.6424			8.85107			1.79182			0.288808
	AVR.		28.378	0.908356		8.57933	0.678054		1.52008	0.678054		0.348666	0.23567
		5. miR-199b-5p
	Sample	Cт	Cт Mean	Cт SD	ΔCт	ΔCт Mean	ΔCт SD	ΔΔCт	ΔΔCт Mean	ΔΔCт SD	2-ΔΔCт	2-ΔΔCт Mean	2-ΔΔCт SD
PN	PN1	21.9316	21.8306	0.0887838	2.10745	2.05618	0.0493185	-0.0388376	-0.0901045	0.0493185	1.02729	1.06486	0.0363187
		21.7954			2.05202			-0.0942651			1.06752
		21.7648			2.00907			-0.137211			1.09978
	PN2	21.8416	21.7456	0.0839296	1.79711	1.92392	0.121754	-0.349178	-0.222361	0.121754	1.27384	1.16942	0.0991527
		21.686			2.03989			-0.106398			1.07654
		21.7093			1.93478			-0.211508			1.1579
	PN3	20.9179	20.7743	0.125507	1.5533	1.4363	0.101541	-0.592985	-0.709988	0.101541	1.50836	1.63846	0.11293
		20.7198			1.38437			-0.761917			1.69574
		20.6853			1.37122			-0.775063			1.71126
	PN4	22.319	22.1754	0.128957	3.81314	3.72223	0.116164	1.66686	1.57594	0.116164	0.314938	0.336158	0.0275348
		22.138			3.76218			1.6159			0.326262
		22.0693			3.59136			1.44508			0.367273
	PN5	20.7902	20.7494	0.0479906	1.39841	1.5928	0.168407	-0.747875	-0.553489	0.168407	1.67932	1.47445	0.177472
		20.7615			1.69461			-0.451674			1.36763
		20.6965			1.68537			-0.460919			1.37642
	AVR.		21.4551	0.610419		2.14628	0.853297		0	0.853297		1	0.474427
IA1	PC21	23.3143	23.2848	0.0257174	3.92117	3.84796	0.0634133	1.77489	1.70168	0.0634133	0.292218	0.307625	0.0133461
		23.2735			3.81263			1.66635			0.31505
		23.2667			3.81008			1.6638			0.315608
	PC23	28.014	29.685	2.91966	2.34833	4.17847	2.98303	0.202047	2.03219	2.98303	0.869316	0.54639	0.457788
		27.9846			2.56641			0.420122			0.747361
		33.0563			7.62068			5.4744			0.0224928
	PC24	28.6031	28.4372	0.156076	2.98832	2.95206	0.0645318	0.842031	0.805772	0.0645318	0.557858	0.572441	0.0259268
		28.4153			2.87755			0.731266			0.602375
		28.2932			2.9903			0.844019			0.55709
	PC26	26.9748	26.9281	0.050943	5.18742	5.06486	0.124767	3.04113	2.91858	0.124767	0.121487	0.132588	0.0114813
		26.9357			5.06918			2.92289			0.131863
		26.8738			4.93799			2.79171			0.144415
	AVR.		27.0838	2.80044		4.01084	1.49862		1.86455	1.49862		0.274608	0.271941
IB	PC13	22.1467	22.1502	0.055383	4.06333	4.08892	0.025942	1.91705	1.94264	0.025942	0.264796	0.260168	0.00467638
		22.0967			4.08824			1.94196			0.260263
		22.2073			4.1152			1.96892			0.255445
	PC18	25.2339	25.1237	0.1018	5.62586	5.66162	0.053512	3.47958	3.51534	0.053512	0.0896484	0.0874936	0.00321119
		25.1038			5.72314			3.57686			0.0838029
		25.0333			5.63586			3.48957			0.0890294
	PC25	24.93	24.6969	0.221034	6.20428	5.9495	0.234593	4.058	3.80322	0.234593	0.0600372	0.0722564	0.0114313
		24.6703			5.74244			3.59615			0.0826895
		24.4903			5.90178			3.7555			0.0740426
	PC10	22.6667	22.6242	0.073959	5.48115	5.59536	0.173383	3.33486	3.44908	0.173383	0.0991075	0.0919954	0.0106605
		22.5388			5.79487			3.64858			0.0797383
		22.667			5.51007			3.36378			0.0971405
	PC11	24.2508	24.0708	0.156119	5.73217	5.65553	0.0684793	3.58588	3.50924	0.0684793	0.0832801	0.0878895	0.00412845
		23.9892			5.63405			3.48777			0.0891411
		23.9724			5.60036			3.45407			0.0912474
	PC14	25.7734	25.7179	0.107061	6.85974	6.8461	0.0665225	4.71346	4.69981	0.0665225	0.0381161	0.0385056	0.00178703
		25.5945			6.77381			4.62753			0.0404553
		25.7859			6.90474			4.75846			0.0369455
	PC2	22.9225	22.9197	0.0529192	5.64197	5.64264	0.094961	3.49569	3.49635	0.094961	0.088653	0.08874	0.00583586
		22.8654			5.73793			3.59165			0.0829482
		22.9711			5.54801			3.40173			0.0946189
	PC29	23.6631	23.5736	0.0778064	4.64801	4.60433	0.0578119	2.50173	2.45805	0.0578119	0.176565	0.182091	0.00736602
		23.5356			4.53877			2.39249			0.190453
		23.5221			4.62621			2.47993			0.179253
	PC3	23.0737	23.0278	0.0487114	5.00701	5.02322	0.0199365	2.86072	2.87694	0.0199365	0.137669	0.136139	0.00187588
		22.9767			5.01718			2.8709			0.136702
		23.0328			5.04548			2.8992			0.134046
	PC5	24.8114	24.8046	0.0672765	6.32928	6.47161	0.12887	4.18299	4.32532	0.12887	0.0550545	0.0500166	0.00453513
		24.8682			6.58038			4.43409			0.0462599
		24.7342			6.50517			4.35888			0.0487354
	PC7	23.259	23.1835	0.065527	5.22511	5.16083	0.0647101	3.07882	3.01455	0.0647101	0.118354	0.123829	0.00555525
		23.1421			5.0957			2.94941			0.129461
		23.1493			5.16168			3.0154			0.123673
	PC9	24.8641	24.8264	0.0392701	3.82534	3.96008	0.178121	1.67906	1.8138	0.178121	0.312286	0.285859	0.0341598
		24.7858			3.89287			1.74659			0.298006
		24.8293			4.16203			2.01575			0.247286
	AVR.		23.8933	1.10546		5.38831	0.853757		3.24203	0.853757		0.105695	0.077279
IIA	PC12	22.3497	22.3175	0.0371412	4.56763	4.59202	0.033016	2.42134	2.44574	0.033016	0.186682	0.183584	0.00417678
		22.326			4.62959			2.48331			0.178834
		22.2769			4.57884			2.43256			0.185236
	PC15	22.6602	22.5063	0.133592	5.39949	5.34484	0.0527879	3.25321	3.19856	0.0527879	0.104879	0.108976	0.00397861
		22.4393			5.34089			3.19461			0.109226
		22.4195			5.29414			3.14785			0.112824
	PC28	24.8348	24.7361	0.088603	4.76673	4.70685	0.0748344	2.62045	2.56057	0.0748344	0.162618	0.169662	0.00889552
		24.71			4.73087			2.58458			0.16671
		24.6635			4.62296			2.47667			0.179658
	PC4	23.9405	23.9205	0.1021	5.78855	5.75607	0.21009	3.64226	3.60978	0.21009	0.0800885	0.0824984	0.0121764
		24.0111			5.94802			3.80174			0.0717071
		23.8099			5.53163			3.38534			0.0956996
	PC6	22.9528	22.9793	0.0509542	5.30949	5.47213	0.141216	3.1632	3.32585	0.141216	0.11163	0.100053	0.0100474
		22.9471			5.54338			3.39709			0.0949233
		23.038			5.56354			3.41725			0.0936061
	AVR.		23.2919	0.945497		5.17438	0.477232		3.0281	0.477232		0.122589	0.04211
IIB+III	PC17	23.798	23.8058	0.0963918	3.29963	3.22461	0.215593	1.15334	1.07832	0.215593	0.449582	0.477191	0.073491
		23.9058			3.39267			1.24638			0.421503
		23.7135			2.98153			0.835243			0.560489
	PC19	27.9486	28.0864	0.126577	7.57155	7.76778	0.186697	5.42527	5.6215	0.186697	0.0232719	0.0204267	0.00266575
		28.1975			7.9432			5.79692			0.0179868
		28.1132			7.7886			5.64231			0.0200214
	PC20	24.4994	24.3139	0.16964	5.04264	4.94375	0.0889221	2.89635	2.79746	0.0889221	0.134311	0.144021	0.00876413
		24.2756			4.91823			2.77194			0.146407
		24.1666			4.87037			2.72409			0.151345
	PC27	27.9336	27.8851	0.0608212	6.67821	6.7172	0.0948806	4.53192	4.57091	0.0948806	0.043227	0.0421344	0.00272253
		27.8169			6.64802			4.50174			0.0441409
		27.9049			6.82536			4.67908			0.0390353
	PC8	22.5914	22.528	0.0551722	4.2389	4.05651	0.161373	2.09262	1.91022	0.161373	0.234455	0.267142	0.0290425
		22.502			3.99835			1.85207			0.276995
		22.4907			3.93227			1.78599			0.289977
	PC1	27.7027	27.6538	0.0439064	8.69539	8.77135	0.077149	6.5491	6.62506	0.077149	0.0106788	0.0101408	0.000541435
		27.6177			8.76902			6.62274			0.0101474
		27.641			8.84963			6.70335			0.00959601
	AVR.		25.7122	2.29702		5.91353	2.05616		3.76725	2.05616		0.0734421	0.174423
		6. miR-382-5p
	Sample	Cт	Cт Mean	Cт SD	ΔCт	ΔCт Mean	ΔCт SD	ΔΔCт	ΔΔCт Mean	ΔΔCт SD	2-ΔΔCт	2-ΔΔCт Mean	2-ΔΔCт SD
PN	PN1	27.8784	27.7103	0.15358	8.05424	7.93588	0.111081	-0.27566	-0.394025	0.111081	1.21055	1.31664	0.100454
		27.5773			7.8339			-0.496001			1.4103
		27.6752			7.91949			-0.410414			1.32907
	PN2	27.4144	27.3497	0.0562406	7.36992	7.52803	0.153419	-0.959984	-0.801877	0.153419	1.94529	1.74997	0.186775
		27.3224			7.67628			-0.65362			1.57311
		27.3124			7.53788			-0.792027			1.73151
	PN3	27.5892	27.5177	0.0627964	8.22463	8.17967	0.0389328	-0.105279	-0.150233	0.0389328	1.0757	1.11002	0.0297182
		27.4924			8.15697			-0.17294			1.12735
		27.4715			8.15742			-0.172482			1.127
	PN4	28.3369	28.3618	0.0239938	9.8311	9.90863	0.0784467	1.5012	1.57873	0.0784467	0.35326	0.335107	0.0181977
		28.3638			9.98797			1.65806			0.316865
		28.3848			9.90683			1.57692			0.335196
	PN5	27.2669	27.2539	0.0139758	7.8751	8.09731	0.193435	-0.45481	-0.232592	0.193435	1.3706	1.18217	0.163851
		27.2557			8.18889			-0.141018			1.10268
		27.2391			8.22796			-0.101948			1.07322
	AVR.		27.6387	0.4128		8.32991	0.856232		4.88498e-16	0.856232		1	0.48605
IA1	PC21	28.2497	28.0851	0.149439	8.85663	8.64828	0.185447	0.526729	0.318372	0.185447	0.694127	0.806314	0.100465
		28.0477			8.58689			0.25698			0.836838
		27.958			8.50131			0.171405			0.887977
	PC23	29.0248	28.9274	0.0928064	3.35916	3.42088	0.061241	-4.97074	-4.90903	0.061241	31.3576	30.0626	1.27647
		28.8401			3.42183			-4.90807			30.0246
		28.9172			3.48163			-4.84827			28.8055
	PC24	29.9746	29.9249	0.0838917	4.35983	4.43971	0.201664	-3.97008	-3.89019	0.201664	15.6716	14.9218	2.00704
		29.828			4.29023			-4.03968			16.4461
		29.972			4.66908			-3.66082			12.6479
	PC26	28.8999	28.7257	0.155992	7.11248	6.86253	0.228952	-1.21742	-1.46737	0.228952	2.32531	2.78806	0.430026
		28.6786			6.81213			-1.51777			2.86349
		28.5987			6.66298			-1.66693			3.17538
	AVR.		28.9158	0.69793		5.84285	2.14258		-2.48706	2.14258		5.60633	12.2337
IB	PC13	26.6396	26.6359	0.0549635	8.55619	8.57461	0.0979972	0.226287	0.244707	0.0979972	0.854832	0.845278	0.0568519
		26.6889			8.68051			0.350606			0.784254
		26.5792			8.48713			0.157226			0.896748
	PC18	30.3001	30.1453	0.138526	10.692	10.6833	0.0440889	2.36209	2.35337	0.0440889	0.194509	0.19575	0.00600744
		30.103			10.7223			2.39244			0.19046
		30.0329			10.6355			2.30557			0.202281
	PC25	29.8317	29.9024	0.0614747	11.106	11.155	0.180376	2.77609	2.82511	0.180376	0.145987	0.141835	0.0172781
		29.9321			11.0042			2.6743			0.156659
		29.9433			11.3548			3.02492			0.122859
	PC10	28.8224	28.8249	0.0288895	11.6368	11.7961	0.272778	3.30689	3.46616	0.272778	0.101048	0.091528	0.0162726
		28.8549			12.111			3.78114			0.0727386
		28.7973			11.6404			3.31046			0.100798
	PC11	29.5478	29.5023	0.0892428	11.0292	11.087	0.10172	2.69928	2.75714	0.10172	0.15397	0.148159	0.0102255
		29.5596			11.2045			2.87459			0.136352
		29.3995			11.0274			2.69754			0.154155
	PC14	29.5292	29.4472	0.139567	10.6155	10.5753	0.154324	2.28557	2.24541	0.154324	0.205104	0.211709	0.0230483
		29.5263			10.7056			2.37569			0.192685
		29.286			10.4049			2.07498			0.237339
	PC2	29.5571	29.534	0.0200692	12.2766	12.257	0.150832	3.94668	3.92711	0.150832	0.0648531	0.0659804	0.00695709
		29.5246			12.3971			4.0672			0.0596557
		29.5205			12.0973			3.76744			0.0734323
	PC29	28.8062	28.8415	0.0756213	9.79107	9.87219	0.138725	1.46117	1.54228	0.138725	0.363199	0.344381	0.0321482
		28.7899			9.79312			1.46322			0.362683
		28.9283			10.0324			1.70247			0.30726
	PC3	28.0915	28.0199	0.0624467	10.0247	10.0153	0.0230183	1.69481	1.68544	0.0230183	0.308896	0.310935	0.00498094
		27.9917			10.0322			1.70229			0.307297
		27.9765			9.98912			1.65921			0.316612
	PC5	30.2542	30.128	0.141941	11.772	11.795	0.0643901	3.44211	3.46512	0.0643901	0.0920071	0.0906109	0.00400074
		30.1556			11.8678			3.53786			0.0860992
		29.9743			11.7453			3.4154			0.0937265
	PC7	28.6048	28.5757	0.0688894	10.5709	10.5531	0.0947737	2.24097	2.22317	0.0947737	0.211544	0.214481	0.0142071
		28.4971			10.4507			2.12076			0.229926
		28.6253			10.6377			2.30778			0.201971
	PC9	25.4718	25.3085	0.141381	4.43296	4.4422	0.110665	-3.89694	-3.88771	0.110665	14.8969	14.8308	1.13137
		25.2293			4.33644			-3.99347			15.9277
		25.2245			4.55719			-3.77272			13.6679
	AVR.		28.7388	1.42836		10.2338	2.01969		1.90394	2.01969		0.267212	4.10335
IIA	PC12	27.6764	27.6069	0.0797803	9.89436	9.8814	0.052737	1.56446	1.55149	0.052737	0.338105	0.34131	0.012553
		27.5198			9.82339			1.49348			0.355154
		27.6245			9.92644			1.59654			0.33067
	PC15	28.0645	28.0341	0.0268529	10.8038	10.8726	0.0601464	2.4739	2.54274	0.0601464	0.180003	0.171716	0.00723625
		28.0135			10.915			2.58513			0.166647
		28.0245			10.8991			2.56919			0.168498
	PC28	29.9931	29.9006	0.0807356	9.92502	9.87132	0.0616315	1.59511	1.54141	0.0616315	0.330996	0.343759	0.0147802
		29.864			9.88491			1.555			0.340328
		29.8445			9.80402			1.47412			0.359953
	PC4	29.3819	29.4064	0.108459	11.23	11.242	0.214203	2.90006	2.91205	0.214203	0.133966	0.133832	0.0196934
		29.525			11.4619			3.13199			0.114071
		29.3123			11.034			2.70409			0.153457
	PC6	28.6299	28.6652	0.0472991	10.9865	11.158	0.164831	2.65662	2.82812	0.164831	0.158591	0.141432	0.0162504
		28.7189			11.3153			2.98535			0.126276
		28.6468			11.1723			2.84239			0.13943
	AVR.		28.7226	0.877779		10.6051	0.638173		2.27516	0.638173		0.206589	0.0997958
IIB+III	PC17	28.6613	28.6774	0.0145411	8.16296	8.09621	0.120003	-0.166949	-0.233691	0.120003	1.12268	1.1786	0.100265
		28.6811			8.16801			-0.161896			1.11876
		28.6896			7.95768			-0.372227			1.29435
	PC19	31.3507	31.2926	0.0513809	10.9736	10.974	0.0245439	2.64368	2.64405	0.0245439	0.160019	0.159994	0.0027213
		31.253			10.9987			2.66877			0.157261
		31.2742			10.9496			2.61969			0.162703
	PC20	29.4566	29.4942	0.0731424	9.99991	10.1241	0.113086	1.67001	1.7942	0.113086	0.314251	0.288927	0.0229287
		29.5785			10.2211			1.89124			0.269576
		29.4475			10.1513			1.82136			0.282955
	PC27	30.9286	30.7991	0.120736	9.67315	9.63116	0.0965832	1.34325	1.30126	0.0965832	0.394132	0.406386	0.0276673
		30.6896			9.52069			1.19079			0.438064
		30.7792			9.69964			1.36974			0.386961
	PC8	27.6457	27.6067	0.0580515	9.29322	9.13516	0.155886	0.963312	0.805251	0.155886	0.512878	0.574488	0.0618417
		27.6343			9.13071			0.800807			0.574028
		27.54			8.98154			0.651634			0.636559
	PC1	30.7027	30.598	0.11993	11.6954	11.7156	0.0528903	3.36548	3.38569	0.0528903	0.0970261	0.0957192	0.00347694
		30.6243			11.7756			3.4457			0.0917782
		30.4672			11.6758			3.34588			0.0983534
	AVR.		29.7447	1.33082		9.94603	1.22049		1.61613	1.22049		0.32621	0.374308
		7. miR-597-5p
	Sample	Cт	Cт Mean	Cт SD	ΔCт	ΔCт Mean	ΔCт SD	ΔΔCт	ΔΔCт Mean	ΔΔCт SD	2-ΔΔCт	2-ΔΔCт Mean	2-ΔΔCт SD
PN	PN1	34.5322	34.2855	0.281325	14.7081	14.511	0.254739	-0.277735	-0.474778	0.254739	1.21229	1.40458	0.256907
		34.3451			14.6016			-0.384163			1.3051
		33.9791			14.2234			-0.762436			1.69635
	PN2	33.4457	33.742	0.269631	13.4012	13.9203	0.449915	-1.58462	-1.06555	0.449915	2.99928	2.16544	0.722483
		33.8073			14.1611			-0.824659			1.77112
		33.973			14.1984			-0.787365			1.72592
	PN3	35.3186	34.7071	0.530186	15.954	15.3691	0.506804	0.968216	0.38326	0.506804	0.511138	0.796421	0.247252
		34.4269			15.0914			0.105631			0.929398
		34.3758			15.0617			0.0759335			0.948728
	PN4	33.6102	33.9638	0.365715	15.1044	15.5106	0.432155	0.118626	0.524792	0.432155	0.921065	0.71566	0.20687
		34.3406			15.9647			0.978931			0.507355
		33.9406			15.4626			0.47682			0.71856
	PN5	34.7084	34.7747	0.0575626	15.3166	15.6181	0.263057	0.330812	0.632273	0.263057	0.795089	0.652564	0.124112
		34.8034			15.7366			0.750748			0.594295
		34.8122			15.8011			0.815258			0.568307
	AVR.		34.2946	0.506148		14.9858	0.761054		0	0.761054		1	0.675363
IA1	PC21	35.972	35.6474	0.485801	16.5789	16.2105	0.507039	1.59308	1.2247	0.507039	0.331463	0.44676	0.167479
		35.8812			16.4204			1.4346			0.369951
		35.0889			15.6322			0.646412			0.638867
	PC23	33.5101	33.6303	0.172936	7.84445	8.12376	0.274359	-7.14135	-6.86204	0.274359	141.176	117.739	22.406
		33.5522			8.13394			-6.85187			115.509
		33.8285			8.39289			-6.59291			96.5306
	PC24	34.4105	33.9863	0.556701	8.79573	8.5011	0.394464	-6.19007	-6.48471	0.394464	73.0127	91.9023	26.4871
		34.1924			8.65461			-6.3312			80.5156
		33.3559			8.05296			-6.93285			122.179
	PC26	38.4784	38.3076	0.287016	16.6911	16.4444	0.300484	1.70527	1.45855	0.300484	0.306665	0.369285	0.0795879
		37.9762			16.1097			1.12391			0.458847
		38.468			16.5323			1.54648			0.342344
	AVR.		35.3929	1.95989		12.3199	4.20144		-2.66588	4.20144		6.34612	57.2986
IB	PC13	33.3333	33.2363	0.115246	15.2499	15.1751	0.0746883	0.264071	0.189248	0.0746883	0.832735	0.877846	0.0454245
		33.1089			15.1005			0.114695			0.923578
		33.2668			15.1748			0.18898			0.877226
	PC18	33.289	33.2097	0.104388	13.6809	13.7477	0.104463	-1.3049	-1.23814	0.104463	2.47067	2.36301	0.167448
		33.2487			13.868			-1.11776			2.17009
		33.0914			13.694			-1.29176			2.44827
	PC25	33.9592	33.4938	0.414423	15.2336	14.7464	0.428223	0.247749	-0.239386	0.428223	0.842209	1.21368	0.32949
		33.3572			14.4294			-0.556431			1.47063
		33.1648			14.5763			-0.409477			1.3282
	PC10	34.2043	34.283	0.413651	17.0187	17.2542	0.64748	2.03291	2.26841	0.64748	0.244362	0.220726	0.0864261
		34.7304			17.9865			3.00068			0.124941
		33.9144			16.7574			1.77164			0.292875
	PC11	34.1973	34.2647	0.340324	15.6787	15.8494	0.358726	0.692856	0.863619	0.358726	0.618628	0.560436	0.128634
		33.9631			15.608			0.622175			0.649691
		34.6337			16.2616			1.27583			0.412989
	PC14	34.6247	34.8937	0.272092	15.711	16.0218	0.318807	0.72521	1.03601	0.318807	0.604909	0.495602	0.107993
		35.1688			16.3481			1.36226			0.388972
		34.8875			16.0064			1.02056			0.492925
	PC2	34.9682	35.0417	0.119835	17.6877	17.7647	0.258115	2.70191	2.77888	0.258115	0.153689	0.147226	0.0252712
		35.18			18.0525			3.06672			0.11935
		34.9769			17.5538			2.568			0.168637
	PC29	34.4904	34.248	0.223105	15.4753	15.2788	0.211836	0.489475	0.292963	0.211836	0.712284	0.822156	0.122087
		34.0512			15.0544			0.0685654			0.953586
		34.2026			15.3067			0.320848			0.800599
	PC3	35.047	34.863	0.383025	16.9802	16.8585	0.350644	1.99444	1.87265	0.350644	0.250965	0.278675	0.0708077
		34.4227			16.4632			1.47735			0.359147
		35.1193			17.132			2.14616			0.225913
	PC5	33.9213	33.9923	0.110627	15.4391	15.6593	0.22603	0.453321	0.673517	0.22603	0.730359	0.632097	0.0981563
		33.9359			15.6481			0.66227			0.631883
		34.1198			15.8908			0.904961			0.534047
	PC7	34.1532	34.0625	0.380515	16.1193	16.0399	0.407555	1.1335	1.05408	0.407555	0.455809	0.494842	0.143663
		33.6449			15.5985			0.612663			0.653988
		34.3895			16.4019			1.41608			0.374729
	PC9	35.5103	36.0902	0.760736	14.4715	15.2239	0.79679	-0.514303	0.238076	0.79679	1.4283	0.933799	0.477489
		36.9516			16.0587			1.07287			0.475372
		35.8088			15.1415			0.155661			0.897721
	AVR.		34.3066	0.856149		15.8016	1.12748		0.815828	1.12748		0.568083	0.601384
IIA	PC12	34.7412	34.7893	0.271262	16.9591	17.0638	0.282195	1.97331	2.07803	0.282195	0.254668	0.239772	0.0444596
		34.5454			16.849			1.86317			0.274871
		35.0814			17.3834			2.39762			0.189777
	PC15	33.9664	33.8559	0.120386	16.7058	16.6944	0.087084	1.71995	1.70865	0.087084	0.303558	0.30632	0.0185881
		33.8737			16.7753			1.78952			0.289267
		33.7276			16.6023			1.61646			0.326135
	PC28	33.6268	33.4636	0.26412	13.5587	13.4343	0.275704	-1.42707	-1.55147	0.275704	2.689	2.96819	0.592674
		33.605			13.6259			-1.35989			2.56666
		33.1588			13.1183			-1.86746			3.64889
	PC4	33.0829	33.0159	0.0586022	14.9309	14.8515	0.134835	-0.0548763	-0.134316	0.134835	1.03877	1.10083	0.105498
		32.9908			14.9277			-0.058073			1.04107
		32.9741			14.6958			-0.289999			1.22264
	PC6	34.0174	33.9573	0.279817	16.3741	16.4501	0.317249	1.38829	1.4643	0.317249	0.382016	0.36813	0.0774591
		34.2021			16.7985			1.81265			0.284667
		33.6523			16.1778			1.19196			0.437707
	AVR.		33.8164	0.636892		15.6988	1.42324		0.713039	1.42324		0.610034	1.09441
IIB+III	PC17	34.6284	34.0577	0.494959	14.13	13.4766	0.571785	-0.855791	-1.50923	0.571785	1.80975	2.98713	1.03958
		33.7448			13.2317			-1.75411			3.37318
		33.8			13.068			-1.9178			3.77846
	PC19	34.125	33.7941	0.351187	13.7479	13.4755	0.289589	-1.23791	-1.51034	0.289589	2.35857	2.88759	0.585909
		33.4256			13.1713			-1.81448			3.51733
		33.8318			13.5072			-1.47864			2.78687
	PC20	33.9678	34.1026	0.178595	14.5111	14.7325	0.253443	-0.474728	-0.253289	0.253443	1.38966	1.20399	0.204937
		34.0349			14.6775			-0.308271			1.23822
		34.3052			15.0089			0.0231323			0.984094
	PC27	34.4965	34.278	0.189653	13.241	13.1101	0.117654	-1.74476	-1.87574	0.117654	3.35138	3.67795	0.294778
		34.1822			13.0133			-1.97246			3.92437
		34.1554			13.0758			-1.91			3.75809
	PC8	34.9514	34.9699	0.287753	16.5989	16.4984	0.274117	1.61313	1.51256	0.274117	0.326888	0.354848	0.0700546
		34.6918			16.1882			1.20236			0.434564
		35.2664			16.708			1.72218			0.303091
	PC1	33.3738	33.2802	0.235205	14.3666	14.3977	0.194012	-0.619253	-0.588076	0.194012	1.53608	1.51222	0.199694
		33.4541			14.6054			-0.380363			1.30167
		33.0126			14.2212			-0.764612			1.69891
	AVR.		34.0804	0.584572		14.2818	1.20311		-0.704021	1.20311		1.62904	1.27114
		8. miR-655-3p
	Sample	Cт	Cт Mean	Cт SD	ΔCт	ΔCт Mean	ΔCт SD	ΔΔCт	ΔΔCт Mean	ΔΔCт SD	2-ΔΔCт	2-ΔΔCт Mean	2-ΔΔCт SD
PN	PN1	28.8624	28.582	0.245043	9.03828	8.80752	0.203518	-0.18008	-0.410842	0.203518	1.13295	1.33809	0.181769
		28.474			8.73063			-0.487737			1.40224
		28.4094			8.65365			-0.564708			1.47909
	PN2	28.6823	28.6539	0.0271277	8.63775	8.8322	0.176441	-0.580614	-0.386158	0.176441	1.49549	1.31353	0.163769
		28.6282			8.98208			-0.236284			1.17795
		28.6513			8.87679			-0.341575			1.26714
	PN3	28.0119	28.0516	0.111892	8.6473	8.71353	0.13048	-0.57106	-0.504835	0.13048	1.48561	1.42277	0.125227
		27.9649			8.62944			-0.588922			1.50412
		28.1779			8.86384			-0.354522			1.27856
	PN4	29.5736	29.246	0.295555	11.0678	10.7928	0.240272	1.84942	1.5744	0.240272	0.277504	0.338802	0.0537021
		28.9994			10.6236			1.40522			0.377561
		29.1649			10.6869			1.46856			0.361342
	PN5	28.0945	28.1024	0.0380841	8.70273	8.9458	0.220403	-0.515632	-0.272566	0.220403	1.42962	1.21754	0.190426
		28.0689			9.00201			-0.216352			1.16179
		28.1438			9.13265			-0.085714			1.06121
	AVR.		28.5272	0.474442		9.21836	0.835342		3.66374e-16	0.835342		1	0.432453
IA1	PC21	29.5211	29.5201	0.0112698	10.128	10.0833	0.0409954	0.909672	0.864912	0.0409954	0.532306	0.549227	0.0155353
		29.5084			10.0476			0.82919			0.562845
		29.5309			10.0742			0.855873			0.552531
	PC23	35.9647	36.3518	0.676936	10.299	10.8453	0.748029	1.08067	1.62693	0.748029	0.472809	0.350826	0.152893
		35.9572			10.539			1.32062			0.400362
		37.1334			11.6979			2.4795			0.179307
	PC24	36.2676	36.9451	1.06888	10.6529	11.4599	1.0444	1.43449	2.24154	1.0444	0.369977	0.245698	0.14043
		38.1773			12.6395			3.42112			0.0933553
		36.3903			11.0874			1.86901			0.273761
	PC26	33.3451	33.2756	0.188791	11.5577	11.4123	0.247908	2.33933	2.19399	0.247908	0.197602	0.220774	0.0396094
		33.4197			11.5533			2.33489			0.198211
		33.0619			11.1261			1.90774			0.26651
	AVR.		34.0231	3.12849		10.9502	0.805365		1.73184	0.805365		0.301067	0.162588
IB	PC13	27.7086	27.6553	0.157225	9.62525	9.59398	0.193995	0.406887	0.37562	0.193995	0.754249	0.775476	0.105665
		27.7789			9.77044			0.552082			0.682035
		27.4783			9.38625			0.167891			0.890143
	PC18	33.0704	32.4826	0.509037	13.4623	13.0205	0.382652	4.24395	3.80218	0.382652	0.052777	0.0732899	0.0177699
		32.1878			12.8071			3.58873			0.0831159
		32.1896			12.7922			3.57386			0.0839769
	PC25	31.9331	32.018	0.0748391	13.2074	13.2706	0.191586	3.98904	4.05228	0.191586	0.0629765	0.0606236	0.00779547
		32.0465			13.1187			3.90031			0.0669716
		32.0744			13.4859			4.26749			0.0519227
	PC10	29.9581	29.8509	0.11393	12.7725	12.8221	0.275969	3.55416	3.60376	0.275969	0.0851316	0.0832444	0.0154554
		29.8634			13.1195			3.90116			0.0669321
		29.7313			12.5743			3.35595			0.0976696
	PC11	30.5315	30.6276	0.0968246	12.0129	12.2123	0.177535	2.7945	2.99394	0.177535	0.144135	0.126172	0.0159104
		30.6261			12.271			3.0526			0.120525
		30.7251			12.3531			3.13473			0.113855
	PC14	31.431	31.3964	0.071794	12.5173	12.5246	0.0355964	3.29896	3.30621	0.0355964	0.101605	0.101116	0.00248566
		31.3139			12.4932			3.2748			0.10332
		31.4444			12.5632			3.34488			0.0984218
	PC2	30.9292	30.7468	0.161081	13.6487	13.4697	0.236855	4.43034	4.25136	0.236855	0.0463804	0.052992	0.00900713
		30.6868			13.5593			4.34096			0.0493449
		30.6243			13.2011			3.98277			0.0632508
	PC29	30.6467	30.6029	0.0379524	11.6316	11.6337	0.0519662	2.41325	2.41529	0.0519662	0.187732	0.187548	0.00674727
		30.5795			11.5827			2.36437			0.194201
		30.5825			11.6866			2.46825			0.180711
	PC3	29.1798	29.0221	0.138065	11.113	11.0175	0.0829573	1.89467	1.79915	0.0829573	0.268935	0.287656	0.0162645
		28.923			10.9635			1.74515			0.298304
		28.9634			10.976			1.75764			0.295731
	PC5	31.4744	31.245	0.213978	12.9923	12.912	0.0856617	3.77392	3.69365	0.0856617	0.0731033	0.0773771	0.00461561
		31.2098			12.9219			3.70357			0.0767564
		31.0508			12.8218			3.60346			0.0822717
	PC7	29.7498	29.6217	0.127619	11.7158	11.599	0.106631	2.49746	2.38066	0.106631	0.177089	0.192369	0.0140353
		29.6208			11.5744			2.356			0.195333
		29.4945			11.5069			2.28852			0.204686
	PC9	28.439	28.4051	0.180204	7.40023	7.53881	0.136493	-1.81814	-1.67955	0.136493	3.52625	3.21286	0.3043
		28.566			7.67311			-1.54525			2.91855
		28.2104			7.54309			-1.67527			3.19379
	AVR.		30.3062	1.41605		11.8012	1.69225		2.58288	1.69225		0.166908	0.874389
IIA	PC12	28.8338	28.7444	0.0779125	11.0518	11.0189	0.0299464	1.83343	1.80056	0.0299464	0.280598	0.287104	0.00593833
		28.7082			11.0118			1.79343			0.288485
		28.6912			10.9932			1.77482			0.292231
	PC15	28.9922	29.0648	0.0840966	11.7315	11.9033	0.164122	2.51319	2.68494	0.164122	0.175168	0.156183	0.0178883
		29.157			12.0585			2.84018			0.139643
		29.0452			11.9198			2.70146			0.153738
	PC28	31.7532	31.6682	0.127631	11.6851	11.639	0.140754	2.46674	2.42062	0.140754	0.180899	0.187378	0.018645
		31.73			11.7509			2.53252			0.172837
		31.5215			11.4809			2.26259			0.208398
	PC4	30.7614	30.6745	0.0959253	12.6094	12.5101	0.0985851	3.39106	3.29169	0.0985851	0.0953214	0.102277	0.00697918
		30.5716			12.5085			3.2901			0.10223
		30.6905			12.4123			3.19391			0.10928
	PC6	29.5658	29.4599	0.0993525	11.9225	11.9527	0.026304	2.70416	2.73437	0.026304	0.15345	0.150287	0.00275371
		29.3688			11.9651			2.74678			0.148983
		29.445			11.9705			2.75217			0.148428
	AVR.		29.9224	1.13228		11.8048	0.509784		2.58643	0.509784		0.166497	0.0645865
IIB+III	PC17	31.1197	31.017	0.0888968	10.6213	10.4359	0.193795	1.40295	1.2175	0.193795	0.378156	0.432631	0.0584505
		30.9647			10.4516			1.23325			0.425359
		30.9666			10.2347			1.01632			0.494377
	PC19	34.5439	34.1957	0.301609	14.1668	13.877	0.252662	4.94842	4.65864	0.252662	0.0323874	0.0399853	0.00663954
		34.0157			13.7614			4.543			0.0428965
		34.0275			13.7029			4.48449			0.0446719
	PC20	31.5871	31.6693	0.0984668	12.1304	12.2992	0.176341	2.91201	3.08085	0.176341	0.132861	0.118774	0.014385
		31.6424			12.2851			3.06671			0.119351
		31.7784			12.4822			3.26384			0.104109
	PC27	34.7895	34.3911	0.410193	13.5341	13.2231	0.378839	4.31576	4.00475	0.378839	0.0502142	0.0637851	0.0174403
		33.9701			12.8012			3.58284			0.0834561
		34.4136			13.334			4.11566			0.057685
	PC8	28.4993	28.5099	0.0278273	10.1468	10.0384	0.0938673	0.928389	0.820008	0.0938673	0.525445	0.567228	0.0361885
		28.489			9.98532			0.766959			0.587655
		28.5415			9.98304			0.764677			0.588585
	PC1	32.4928	32.4092	0.0834376	13.4855	13.5267	0.03792	4.26715	4.30837	0.03792	0.051935	0.0504838	0.00133196
		32.4088			13.5601			4.34177			0.049317
		32.3259			13.5345			4.31619			0.0501994
	AVR.		32.032	2.06421		12.2334	1.54909		3.01502	1.54909		0.123705	0.216138
		R. RNU6
	Sample	Cт	Cт Mean	Cт SD
PN	PN1	19.8242	19.7744	0.0434976
		19.7434
		19.7558
	PN2	20.0445	19.8217	0.203347
		19.6461
		19.7745
	PN3	19.3646	19.338	0.0253583
		19.3355
		19.314
	PN4	18.5058	18.4532	0.0684359
		18.3758
		18.478
	PN5	19.3918	19.1566	0.205574
		19.0669
		19.0112
IA1	PC21	19.3931	19.4369	0.0379647
		19.4608
		19.4566
	PC23	25.6657	25.5065	0.138128
		25.4182
		25.4356
	PC24	25.6148	25.4852	0.16244
		25.5378
		25.3029
	PC26	21.7874	21.8632	0.0742482
		21.8665
		21.9358
IB	PC13	18.0834	18.0613	0.045994
		18.0084
		18.0921
	PC18	19.6081	19.4621	0.126731
		19.3807
		19.3974
	PC25	18.7257	18.7474	0.170713
		18.9279
		18.5885
	PC10	17.1856	17.0288	0.247152
		16.7439
		17.157
	PC11	18.5186	18.4153	0.0899174
		18.3551
		18.372
	PC14	18.9137	18.8718	0.0471771
		18.8207
		18.8811
	PC2	17.2805	17.277	0.147853
		17.1275
		17.4231
	PC29	19.0151	18.9693	0.0641924
		18.9968
		18.8959
	PC3	18.0667	18.0045	0.0556299
		17.9595
		17.9873
	PC5	18.4821	18.333	0.132465
		18.2879
		18.229
	PC7	18.0339	18.0227	0.030966
		18.0464
		17.9876
	PC9	21.0388	20.8663	0.187162
		20.8929
		20.6673
IIA	PC12	17.782	17.7255	0.0489912
		17.6964
		17.698
	PC15	17.2607	17.1615	0.0869486
		17.0984
		17.1254
	PC28	20.0681	20.0292	0.045529
		19.9791
		20.0405
	PC4	18.152	18.1644	0.108121
		18.0631
		18.2783
	PC6	17.6433	17.5072	0.123122
		17.4037
		17.4745
IIB+III	PC17	20.4984	20.5812	0.130818
		20.5131
		20.732
	PC19	20.3771	20.3187	0.0616014
		20.2543
		20.3246
	PC20	19.4567	19.3701	0.0809957
		19.3574
		19.2962
	PC27	21.2554	21.168	0.0879286
		21.1689
		21.0796
	PC8	18.3525	18.4715	0.106652
		18.5036
		18.5584
	PC1	19.0073	18.8824	0.111847
		18.8487
		18.7914

## Sheet: S4
5	qRT-PCR Raw Data (Relative E5, E6, E7 mRNA expression to GAPDH)
		1. CaSki cell line
	Sample	Cт	Cт Mean	Cт SD	ΔCт	ΔCт Mean	ΔCт SD	2-ΔCт	2-ΔCт Mean	2-ΔCт SD
Blank	Blank 1	25.2099	25.1736	0.0619717	0	0	0	1000	1000	0
		25.2088			0			1000
		25.102			0			1000
	Blank 2	25.3083	25.3198	0.0850111	0	0	0	1000	1000	0
		25.2411			0			1000
		25.41			0			1000
	Blank 3	25.7306	25.5223	0.19653	0	0	0	1000	1000	0
		25.4961			0			1000
		25.3401			0			1000
	AVR.		25.3385	0.188201		0	0		1000	0
Scrambled shRNA	Scramb. sh 1	25.1289	25.0424	0.0758645	0	0	0	1000	1000	0
		25.011			0			1000
		24.9873			0			1000
	Scramb. Sh 2	33.5121	33.5247	0.0164658	0	0	0	1000	1000	0
		33.5186			0			1000
		33.5433			0			1000
	Scramb. Sh 3	33.5121	33.5247	0.0164658	0	0	0	1000	1000	0
		33.5186			0			1000
		33.5433			0			1000
	AVR.		30.6973	4.24132		0	0		1000	0
E5 shRNA	shRNA 1	25.1289	25.0424	0.0758645	0	0	0	1000	1000	0
		25.011			0			1000
		24.9873			0			1000
	shRNA 2	33.5121	33.5247	0.0164658	0	0	0	1000	1000	0
		33.5186			0			1000
		33.5433			0			1000
	shRNA 3	33.5121	33.5247	0.0164658	0	0	0	1000	1000	0
		33.5186			0			1000
		33.5433			0			1000
	AVR.		30.6973	4.24132		0	0		1000	0
Scrambled siRNA	Scramb. Si 1	25.1289	25.0424	0.0758645	0	0	0	1000	1000	0
		25.011			0			1000
		24.9873			0			1000
	Scramb. Si 2	33.5121	33.5247	0.0164658	0	0	0	1000	1000	0
		33.5186			0			1000
		33.5433			0			1000
	Scramb. Si 3	33.5121	33.5247	0.0164658	0	0	0	1000	1000	0
		33.5186			0			1000
		33.5433			0			1000
	AVR.		30.6973	4.24132		0	0		1000	0
E6/E7 siRNA	siRNA 1	25.1289	25.0424	0.0758645	0	0	0	1000	1000	0
		25.011			0			1000
		24.9873			0			1000
	siRNA 2	33.5121	33.5247	0.0164658	0	0	0	1000	1000	0
		33.5186			0			1000
		33.5433			0			1000
	siRNA 3	33.5121	33.5247	0.0164658	0	0	0	1000	1000	0
		33.5186			0			1000
		33.5433			0			1000
	AVR.		30.6973	4.24132		0	0		1000	0
		2. SiHa cell line
	Sample	Cт	Cт Mean	Cт SD	ΔCт	ΔCт Mean	ΔCт SD	2-ΔCт	2-ΔCт Mean	2-ΔCт SD
Blank	Blank 1	25.2099	25.1736	0.0619717	0	0	0	1000	1000	0
		25.2088			0			1000
		25.102			0			1000
	Blank 2	25.3083	25.3198	0.0850111	0	0	0	1000	1000	0
		25.2411			0			1000
		25.41			0			1000
	Blank 3	25.7306	25.5223	0.19653	0	0	0	1000	1000	0
		25.4961			0			1000
		25.3401			0			1000
	AVR.		25.3385	0.188201		0	0		1000	0
Scrambled shRNA	Scramb. sh 1	25.1289	25.0424	0.0758645	0	0	0	1000	1000	0
		25.011			0			1000
		24.9873			0			1000
	Scramb. Sh 2	33.5121	33.5247	0.0164658	0	0	0	1000	1000	0
		33.5186			0			1000
		33.5433			0			1000
	Scramb. Sh 3	33.5121	33.5247	0.0164658	0	0	0	1000	1000	0
		33.5186			0			1000
		33.5433			0			1000
	AVR.		30.6973	4.24132		0	0		1000	0
E5 shRNA	shRNA 1	25.1289	25.0424	0.0758645	0	0	0	1000	1000	0
		25.011			0			1000
		24.9873			0			1000
	shRNA 2	33.5121	33.5247	0.0164658	0	0	0	1000	1000	0
		33.5186			0			1000
		33.5433			0			1000
	shRNA 3	33.5121	33.5247	0.0164658	0	0	0	1000	1000	0
		33.5186			0			1000
		33.5433			0			1000
	AVR.		30.6973	4.24132		0	0		1000	0
Scrambled siRNA	Scramb. Si 1	25.1289	25.0424	0.0758645	0	0	0	1000	1000	0
		25.011			0			1000
		24.9873			0			1000
	Scramb. Si 2	33.5121	33.5247	0.0164658	0	0	0	1000	1000	0
		33.5186			0			1000
		33.5433			0			1000
	Scramb. Si 3	33.5121	33.5247	0.0164658	0	0	0	1000	1000	0
		33.5186			0			1000
		33.5433			0			1000
	AVR.		30.6973	4.24132		0	0		1000	0
E6/E7 siRNA	siRNA 1	25.1289	25.0424	0.0758645	0	0	0	1000	1000	0
		25.011			0			1000
		24.9873			0			1000
	siRNA 2	33.5121	33.5247	0.0164658	0	0	0	1000	1000	0
		33.5186			0			1000
		33.5433			0			1000
	siRNA 3	33.5121	33.5247	0.0164658	0	0	0	1000	1000	0
		33.5186			0			1000
		33.5433			0			1000
	AVR.		30.6973	4.24132		0	0		1000	0
		R. GAPDH
	Sample	Cт	Cт Mean	Cт SD
Blank	Blank 1	25.2099	25.1736	0.0619717
		25.2088
		25.102
	Blank 2	25.3083	25.3198	0.0850111
		25.2411
		25.41
	Blank 3	25.7306	25.5223	0.19653
		25.4961
		25.3401
Scrambled shRNA	Scramb. sh 1	25.1289	25.0424	0.0833766
		25.011
		24.9873
	Scramb. Sh 2	33.5121	33.5247	0.0164658
		33.5186
		33.5433
	Scramb. Sh 3	33.5121	33.5247	0.0164658
		33.5186
		33.5433
E5 shRNA	ShRNA 1	25.1289	25.0424	0.0833766
		25.011
		24.9873
	ShRNA 2	33.5121	33.5247	0.0164658
		33.5186
		33.5433
	ShRNA 3	33.5121	33.5247	0.0164658
		33.5186
		33.5433
Scrambled siRNA	Scramb. Si 1	25.1289	25.0424	0.0758645
		25.011
		24.9873
	Scramb. Si 2	33.5121	33.5247	0.0164658
		33.5186
		33.5433
	Scramb. Si 3	33.5121	33.5247	0.0164658
		33.5186
		33.5433
E6/E7 siRNA	SiRNA 1	25.1289	25.0424	0.0758645
		25.011
		24.9873
	SiRNA 2	33.5121	33.5247	0.0164658
		33.5186
		33.5433
	SiRNA 3	33.5121	33.5247	0.0164658
		33.5186
		33.5433

## Sheet: S5
6	qRT-PCR Raw Data (Relative Expression of miRNAs to U6)
	Target Gene : miR-148a-3p, miR-190a-5p, miR-199b-5p, miR-655-3p
	Reference Gene : RNU6
	Sample : Caski(Blank, Scramble_shRNA, E5 shRNA 24hr, E5 shRNA 48hr, E5 shRNA 72hr, Scramble_siRNA, E6/7 siRNA 24hr, E6/7 siRNA 48hr, E6/7 siRNA 72hr), SiHa(Blank, Scramble_shRNA, E5 shRNA 24hr, E5 shRNA 48hr, E5 shRNA 72hr, Scramble_siRNA, E6/7 siRNA 24hr, E6/7 siRNA 48hr, E6/7 siRNA 72hr)
	Total 18samples of Human RNA
	ΔCт = Target Cт - RNU6 Cт				ΔΔCт = Target Sample ΔCт - control Sample ΔCт
	2-ΔΔCт = Normalized gene amount of target group relative to target gene amount of control group
		1. miR-148a-3p
	Sample	Cт	Cт Mean	Cт SD	ΔCт	ΔCт Mean	ΔCт SD	2-ΔCт	2-ΔCт Mean	2-ΔCт SD
Caski	Blank	30.4102	30.2029	0.181503	13.0974	13.0791	0.0871405	0.114099	0.115703	0.00704883
		30.0729			12.9842			0.123416
		30.1255			13.1555			0.109595
	Scramble_(shRNA)	30.4295	30.5337	0.0914408	12.8659	13.0493	0.204996	0.133959	0.118754	0.0165102
		30.5709			13.0114			0.12111
		30.6007			13.2706			0.101192
	E5 shRNA 24 hr	30.7449	30.5442	0.174681	13.6301	13.7648	0.130111	0.0788727	0.0720401	0.00652249
		30.4261			13.7744			0.0713677
		30.4617			13.8898			0.0658799
	E5 shRNA 48 hr	29.4599	29.28	0.161922	12.8195	12.6388	0.182239	0.138337	0.157634	0.0199031
		29.2339			12.6418			0.156474
		29.1461			12.4551			0.178092
	E5 shRNA 72 hr	28.9083	28.794	0.0996206	11.793	11.9431	0.131932	0.2818	0.254674	0.0237921
		28.7259			12.0407			0.237345
		28.7477			11.9957			0.244875
	Scramble_(siRNA)	30.837	30.7073	0.114246	13.7058	13.6972	0.060364	0.0748392	0.0753314	0.00316505
		30.6633			13.7528			0.0724414
		30.6216			13.633			0.0787138
	E6/7 SiRNA 24 hr	29.9243	29.95	0.119101	12.9186	12.8896	0.0917772	0.129153	0.131957	0.00850324
		29.8458			12.7868			0.141508
		30.0798			12.9634			0.12521
	E6/7 SiRNA 48hr	29.8989	29.8569	0.0398057	12.7541	12.8505	0.0872555	0.144756	0.135563	0.00828563
		29.8198			12.8735			0.133259
		29.8521			12.924			0.128673
	E6/7 SiRNA 72hr	28.9346	28.948	0.0369443	12.1803	12.1746	0.216745	0.215457	0.217946	0.0327472
		28.9897			12.3884			0.186513
		28.9196			11.9551			0.251866
SiHa	Blank	30.0232	29.9753	0.139027	13.4063	13.4225	0.10243	0.0921086	0.0912322	0.00642002
		30.0841			13.5321			0.084419
		29.8187			13.3291			0.0971691
	Scramble_(shRNA)	29.8375	29.7034	0.12095	13.4728	13.3105	0.167827	0.0879575	0.0988775	0.0115451
		29.6027			13.3211			0.0977151
		29.67			13.1377			0.11096
	E5 shRNA 24 hr	30.3537	30.3138	0.0634034	14.1003	14.075	0.0271826	0.056937	0.0579486	0.00109377
		30.347			14.0463			0.0591092
		30.2406			14.0786			0.0577997
	E5 shRNA 48 hr	29.335	29.2077	0.110382	13.1346	12.9589	0.248688	0.111196	0.126879	0.0227556
		29.1383			13.0678			0.116463
		29.1499			12.6744			0.152978
	E5 shRNA 72 hr	28.6966	28.6286	0.0618302	12.3715	12.4271	0.0521823	0.18872	0.181661	0.00659546
		28.6137			12.4348			0.180608
		28.5756			12.475			0.175656
	Scramble_(siRNA)	30.1481	30.0777	0.100762	13.613	13.6181	0.0455505	0.0798131	0.0795559	0.0025049
		29.9623			13.5754			0.0819223
		30.1227			13.666			0.0769324
	E6/7 SiRNA 24 hr	30.3536	30.1816	0.149004	13.5703	13.722	0.131448	0.0822135	0.0742149	0.00692924
		30.0936			13.8014			0.0700408
		30.0976			13.7943			0.0703903
	E6/7 SiRNA 48hr	29.6814	29.5836	0.12089	13.5119	13.4451	0.127001	0.0856074	0.0899006	0.00810201
		29.6209			13.5247			0.0848487
		29.4484			13.2986			0.0992457
	E6/7 SiRNA 72hr	28.9214	28.7726	0.129976	12.3882	12.3938	0.066111	0.186538	0.185957	0.00849496
		28.6813			12.3306			0.194147
		28.715			12.4624			0.177187
		2. miR-190a-5p
	Sample	Cт	Cт Mean	Cт SD	ΔCт	ΔCт Mean	ΔCт SD	2-ΔCт	2-ΔCт Mean	2-ΔCт SD
Caski	Blank	31.5587	31.467	0.115549	14.2459	14.3432	0.0877694	0.0514698	0.0481732	0.00296301
		31.5051			14.4164			0.045732
		31.3372			14.3673			0.0473178
	Scramble_(shRNA)	34.4996	34.1786	0.59173	16.936	16.6942	0.670578	0.00797528	0.0101729	0.00504934
		33.4957			15.9362			0.0159486
		34.5403			17.2103			0.00659471
	E5 shRNA 24 hr	34.1428	33.7514	0.33965	17.0281	16.9719	0.0778899	0.0074824	0.00778698	0.000426105
		33.5347			16.883			0.00827392
		33.5766			17.0047			0.00760462
	E5 shRNA 48 hr	33.1453	32.7192	0.397263	16.505	16.0781	0.418678	0.0107526	0.0148615	0.0042314
		32.6532			16.0611			0.0146262
		32.3591			15.6681			0.0192056
	E5 shRNA 72 hr	30.4469	30.3383	0.0963786	13.3316	13.4875	0.145495	0.0970014	0.0873683	0.00890365
		30.3049			13.6198			0.0794409
		30.263			13.511			0.0856627
	Scramble_(siRNA)	31.6715	31.391	0.248784	14.5404	14.3809	0.138836	0.0419676	0.0470136	0.00439849
		31.1971			14.2866			0.0500372
		31.3044			14.3158			0.0490358
	E6/7 SiRNA 24 hr	30.1208	30.2059	0.118743	13.1152	13.1456	0.0695369	0.112703	0.110438	0.0052531
		30.1554			13.0964			0.114179
		30.3416			13.2251			0.104433
	E6/7 SiRNA 48hr	33.8026	34.0036	0.594919	16.6577	16.9972	0.632283	0.0096723	0.00809992	0.00302702
		34.673			17.7267			0.0046103
		33.5353			16.6072			0.0100172
	E6/7 SiRNA 72hr	31.4397	31.3524	0.103097	14.6854	14.5791	0.268026	0.0379526	0.0413425	0.00799198
		31.3789			14.7776			0.0356042
		31.2387			14.2742			0.0504707
SiHa	Blank	30.2611	30.5168	0.223497	13.6442	13.964	0.276938	0.0781044	0.0633761	0.0127551
		30.6749			14.1229			0.0560529
		30.6145			14.125			0.055971
	Scramble_(shRNA)	29.004	29.1878	0.160405	12.6393	12.7949	0.170901	0.156743	0.141372	0.0164855
		29.2594			12.9778			0.123962
		29.2998			12.7675			0.143412
	E5 shRNA 24 hr	32.5918	33.126	0.470117	16.3385	16.8873	0.475534	0.0120679	0.00856969	0.00303029
		33.4767			17.176			0.00675299
		33.3095			17.1474			0.00688819
	E5 shRNA 48 hr	31.036	31.4763	0.422722	14.8356	15.2276	0.340077	0.0342019	0.0265711	0.00661616
		31.5142			15.4437			0.0224373
		31.8789			15.4034			0.023074
	E5 shRNA 72 hr	31.795	31.7263	0.153382	15.4699	15.5247	0.112772	0.0220344	0.0212552	0.00162374
		31.8333			15.6544			0.0193887
		31.5505			15.4499			0.0223425
	Scramble_(siRNA)	31.8927	31.9547	0.278993	15.3576	15.4951	0.330849	0.0238179	0.0220187	0.00471569
		32.2594			15.8725			0.0166682
		31.7119			15.2552			0.0255699
	E6/7 SiRNA 24 hr	31.7219	31.4386	0.251048	14.9386	14.979	0.0684259	0.0318454	0.0309877	0.00144908
		31.3501			15.058			0.0293146
		31.2438			14.9405			0.031803
	E6/7 SiRNA 48hr	30.1279	30.226	0.0992637	13.9584	14.0875	0.114473	0.0628199	0.0575642	0.00464638
		30.2238			14.1276			0.0558698
		30.3264			14.1766			0.0540028
	E6/7 SiRNA 72hr	29.6409	29.5595	0.178314	13.1078	13.1807	0.130876	0.11328	0.107992	0.00952798
		29.6825			13.3318			0.0969923
		29.355			13.1025			0.113702
		3. miR-199b-5p
	Sample	Cт	Cт Mean	Cт SD	ΔCт	ΔCт Mean	ΔCт SD	2-ΔCт	2-ΔCт Mean	2-ΔCт SD
Caski	Blank	34.6618	34.1685	1.5832	17.349	17.0446	1.48864	0.00599009	0.0105537	0.0106209
		35.4463			18.3576			0.00297726
		32.3973			15.4274			0.0226937
	Scramble_(shRNA)	33.7905	33.3049	0.49155	16.2269	15.8205	0.378696	0.0130379	0.0176709	0.00445238
		33.3165			15.757			0.0180576
		32.8076			15.4776			0.0219174
	E5 shRNA 24 hr	34.4023	33.2702	0.980451	17.2875	16.4907	0.69161	0.00625074	0.0116304	0.00468158
		32.6977			16.046			0.0147804
		32.7107			16.1387			0.01386
	E5 shRNA 48 hr	33.0192	33.4134	0.643191	16.3788	16.7723	0.60148	0.0117349	0.00941827	0.00338895
		33.0654			16.4733			0.0109913
		34.1556			17.4646			0.00552866
	E5 shRNA 72 hr	35.4912	34.0972	1.59193	18.3759	17.2463	1.40194	0.00293961	0.00892208	0.00884611
		32.3625			15.6773			0.0190835
		34.4378			17.6857			0.00474315
	Scramble_(siRNA)	36.8271	34.7136	1.89112	19.696	17.7035	1.77985	0.00117739	0.00691005	0.00573451
		33.1814			16.2709			0.0126464
		34.1322			17.1436			0.00690634
	E6/7 SiRNA 24 hr	33.3638	34.0797	1.24272	16.3581	17.0194	1.19447	0.0119045	0.00905942	0.00534421
		33.3607			16.3017			0.0123792
		35.5147			18.3982			0.00289455
	E6/7 SiRNA 48hr	33.7629	34.2907	1.25354	16.618	17.2843	1.31022	0.00994197	0.00779414	0.00488747
		33.3873			16.441			0.0112399
		35.7218			18.7937			0.00220054
	E6/7 SiRNA 72hr	36.0262	35.4457	1.95488	19.2719	18.6723	2.13484	0.00157977	0.00488644	0.0065029
		37.0446			20.4433			0.000701363
		33.2663			16.3018			0.0123782
SiHa	Blank	Undetermined	35.8712	0.626937	-	19.3504	0.671115	-	0.00157768	0.000708538
		35.4279			18.8759			0.00207869
		36.3145			19.825			0.00107667
	Scramble_(shRNA)	34.6562	34.4139	0.629714	18.2915	18.021	0.523684	0.00311687	0.00393796	0.00153839
		33.699			17.4174			0.00571269
		34.8864			18.3542			0.00298432
	E5 shRNA 24 hr	34.9722	33.6889	1.26407	18.7188	17.4501	1.28767	0.0023178	0.00718894	0.0059402
		32.445			16.1443			0.0138066
		33.6494			17.4873			0.00544241
	E5 shRNA 48 hr	34.1301	34.204	0.403586	17.9297	17.9552	0.197203	0.00400514	0.0039593	0.000532897
		33.8424			17.772			0.0044678
		34.6394			18.1639			0.00340496
	E5 shRNA 72 hr	34.4279	34.5089	2.35101	18.1028	18.3074	2.31766	0.00355225	0.0061267	0.0071896
		36.8994			20.7205			0.000578757
		32.1994			16.0988			0.0142491
	Scramble_(siRNA)	35.7217	36.0671	0.685113	19.1866	19.6075	0.746335	0.0016759	0.00135469	0.000576716
		36.8561			20.4692			0.000688895
		35.6233			19.1666			0.00169929
	E6/7 SiRNA 24 hr	Undetermined	36.9186	3.49272	-	20.6209	3.48482	-	0.00176719	0.00234024
		34.4488			18.1567			0.00342199
		39.3883			23.085			0.000112388
	E6/7 SiRNA 48hr	33.2449	35.0427	1.82787	17.0754	18.9042	1.86481	0.00724082	0.0033091	0.00349693
		36.8992			20.8031			0.000546581
		34.9838			18.834			0.00213989
	E6/7 SiRNA 72hr	33.3024	33.541	0.350614	16.7693	17.1622	0.413056	0.00895251	0.00700325	0.00194692
		33.9436			17.5928			0.00505869
		33.3771			17.1245			0.00699854
		4. miR-655-3p
	Sample	Cт	Cт Mean	Cт SD	ΔCт	ΔCт Mean	ΔCт SD	2-ΔCт	2-ΔCт Mean	2-ΔCт SD
Caski	Blank	35.7892	35.5017	0.778394	18.4764	18.3779	0.801401	0.00274195	0.00325595	0.00181972
		34.6204			17.5317			0.00527738
		36.0954			19.1254			0.00174851
	Scramble_(shRNA)	36.5574	36.3183	0.936097	18.9938	18.8339	0.810129	0.00191561	0.00238334	0.00137729
		37.1116			19.5521			0.00130082
		35.2858			17.9557			0.00393357
	E5 shRNA 24 hr	34.8549	34.6355	0.525695	17.7402	17.856	0.539442	0.00456746	0.00440613	0.00152769
		34.0356			17.3839			0.00584674
		35.0159			18.444			0.00280417
	E5 shRNA 48 hr	34.5639	34.7026	0.243195	17.9235	18.0615	0.286958	0.00402243	0.0037022	0.000691706
		34.9834			18.3913			0.00290841
		34.5605			17.8695			0.00417577
	E5 shRNA 72 hr	34.5804	34.1052	0.537204	17.4652	17.2544	0.420398	0.00552665	0.00658833	0.0020453
		34.2129			17.5277			0.00529219
		33.5223			16.7703			0.00894616
	Scramble_(siRNA)	35.1874	35.0757	0.559466	18.0563	18.0657	0.590143	0.00366877	0.0038504	0.00153584
		35.5709			18.6605			0.00241345
		34.4689			17.4803			0.00546897
	E6/7 SiRNA 24 hr	33.5491	35.8065	1.95583	16.5435	18.7462	1.90782	0.0104694	0.00419659	0.00543248
		36.8783			19.8194			0.00108089
		36.9922			19.8757			0.00103946
	E6/7 SiRNA 48hr	35.802	35.5403	0.229229	18.6571	18.5339	0.115338	0.00241909	0.00264032	0.000209009
		35.3748			18.4285			0.00283447
		35.4442			18.5161			0.00266738
	E6/7 SiRNA 72hr	34.5847	35.0006	0.747154	17.8304	18.2272	0.584669	0.00429066	0.00342632	0.00120785
		34.5539			17.9526			0.0039421
		35.8631			18.8986			0.00204621
SiHa	Blank	33.5994	34.7606	1.20493	16.9825	18.2078	1.23534	0.00772268	0.00415489	0.00324074
		36.0049			19.4529			0.00139345
		34.6776			18.188			0.00334855
	Scramble_(shRNA)	35.9202	35.9734	0.438485	19.5555	19.5805	0.561818	0.00129779	0.0013402	0.000505887
		36.4361			20.1545			0.000856849
		35.5639			19.0317			0.00186595
	E5 shRNA 24 hr	35.2692	34.9917	0.836539	19.0159	18.753	0.89986	0.00188649	0.00259203	0.00170215
		34.0516			17.7509			0.0045335
		35.6542			19.4921			0.0013561
	E5 shRNA 48 hr	34.3898	34.591	0.182535	18.1894	18.3422	0.28896	0.00334545	0.003048	0.00057209
		34.7459			18.6755			0.00238846
		34.6372			18.1618			0.00341009
	E5 shRNA 72 hr	34.3652	34.863	0.493285	18.0402	18.6615	0.606057	0.00370998	0.00255727	0.00106751
		34.8722			18.6934			0.00235907
		35.3517			19.251			0.00160275
	Scramble_(siRNA)	34.8271	34.7234	0.426626	18.292	18.2638	0.452612	0.00311574	0.00328336	0.00103189
		35.0885			18.7016			0.00234554
		34.2544			17.7977			0.0043888
	E6/7 SiRNA 24 hr	35.3297	34.7493	0.578754	18.5464	18.2897	0.358492	0.00261207	0.00318803	0.000834656
		34.1722			17.8801			0.00414523
		34.7459			18.4426			0.00280679
	E6/7 SiRNA 48hr	35.1959	34.9359	0.366826	19.0264	18.7974	0.37341	0.00187271	0.00224661	0.000617073
		35.0955			18.9993			0.00190827
		34.5163			18.3665			0.00295885
	E6/7 SiRNA 72hr	34.8506	34.9951	0.254494	18.3175	18.6163	0.311004	0.00306119	0.00252688	0.000535181
		35.289			18.9382			0.00199083
		34.8457			18.5932			0.00252864
		R. RNU6
	Sample	Cт	Cт Mean	Cт SD
Caski	Blank	17.3128	17.1238	0.174094
		17.0887
		16.97
	Scramble_(shRNA)	17.5636	17.4844	0.13365
		17.5595
		17.3301
	E5 shRNA 24 hr	17.1148	16.7795	0.293104
		16.6517
		16.5719
	E5 shRNA 48 hr	16.6404	16.6411	0.0494552
		16.5921
		16.691
	E5 shRNA 72 hr	17.1153	16.8508	0.231443
		16.6852
		16.752
	Scramble_(siRNA)	17.1311	17.0101	0.111899
		16.9105
		16.9886
	E6/7 SiRNA 24 hr	17.0056	17.0604	0.0554185
		17.059
		17.1164
	E6/7 SiRNA 48hr	17.1449	17.0064	0.120242
		16.9463
		16.9281
	E6/7 SiRNA 72hr	16.7543	16.7734	0.182352
		16.6013
		16.9645
SiHa	Blank	16.6169	16.5528	0.0636758
		16.552
		16.4895
	Scramble_(shRNA)	16.3647	16.3929	0.127693
		16.2816
		16.5323
	E5 shRNA 24 hr	16.2534	16.2387	0.0704741
		16.3007
		16.1621
	E5 shRNA 48 hr	16.2004	16.2488	0.206808
		16.0704
		16.4755
	E5 shRNA 72 hr	16.3251	16.2015	0.113918
		16.1788
		16.1007
	Scramble_(siRNA)	16.5351	16.4596	0.0741375
		16.3869
		16.4567
	E6/7 SiRNA 24 hr	16.7833	16.4596	0.280445
		16.2921
		16.3033
	E6/7 SiRNA 48hr	16.1695	16.1385	0.0379474
		16.0962
		16.1498
	E6/7 SiRNA 72hr	16.5331	16.3788	0.142386
		16.3508
		16.2525
